# Supplementary material for: Cardiac mitochondrial function depends on BUD23 mediated ribosome programming
Source: eLife. 2020 Jan 15;9:e50705. doi: 10.7554/eLife.50705 (PMC7002040; doi:10.7554/eLife.50705)
Supplement: Figure 2—source data 1. — Proteomics was performed on A549 cell lysates 48 hr after transfection with either BUD23-targeting siRNA or control siRNA. Significantly down-regulated and up-regulated proteins were defined using Welch’s T-test with a permutation-based FDR < 0.05. [file elife-50705-fig2-data1.xlsx]

## Sheet: merm1_2validimpute
Significant	#NAME?	Difference	Protein IDs	Majority protein IDs	Protein names	Gene names	Symbol color	Symbol type	Symbol size	Show label	Only identified by site	Reverse	Potential contaminant	Peptides	Razor + unique peptides	Unique peptides	Sequence coverage [%]	Unique + razor sequence coverage [%]	Unique sequence coverage [%]	Mol. weight [kDa]	Q-value	Score	Intensity	MS/MS Count	LFQ intensity merm1_1	LFQ intensity merm1_2	LFQ intensity merm1_3	LFQ intensity WT_1	LFQ intensity WT_2	LFQ intensity WT_3
+	1.57413	0.732815	A8MXV4	A8MXV4	Nucleoside diphosphate-linked moiety X motif 19, mitochondrial	NUDT19	Color2 [DarkGray]	1	4					3	3	3	13.6	13.6	13.6	42.233	0	6.7627	69803000	12	23.7079	24.143	23.6674	23.3901	22.878	23.0517
+	3.87021	-0.898379	O43175	O43175	D-3-phosphoglycerate dehydrogenase	PHGDH	Color2 [DarkGray]	1	4					13	13	13	29.5	29.5	29.5	56.65	0	46.242	799730000	49	26.113	26.3174	26.2653	27.1526	27.1184	27.1198
+	2.7527	-0.594044	O43765	O43765	Small glutamine-rich tetratricopeptide repeat-containing protein alpha	SGTA	Color2 [DarkGray]	1	4					5	5	5	18.8	18.8	18.8	34.063	0	23.607	342370000	23	25.2687	25.2842	25.0628	25.7529	25.7736	25.8712
+	4.20028	1.09201	O43852	O43852	Calumenin	CALU	Color2 [DarkGray]	1	4					16	16	16	59	59	59	37.106	0	234.23	3459900000	93	29.4743	29.3368	29.5387	28.3271	28.3926	28.3541
+	2.56362	-0.902054	O60493	O60493	Sorting nexin-3	SNX3	Color2 [DarkGray]	1	4					8	7	7	54.3	54.3	54.3	18.762	0	34.056	338740000	27	25.1557	24.78	25.138	25.805	25.9838	25.9911
+	2.3244	0.412457	O75083	O75083	WD repeat-containing protein 1	WDR1	Color2 [DarkGray]	1	4					27	27	27	57.8	57.8	57.8	66.193	0	323.31	9083200000	179	30.6206	30.5217	30.396	30.0384	30.115	30.1476
+	2.39204	0.857773	O75340	O75340	Programmed cell death protein 6	PDCD6	Color2 [DarkGray]	1	4					6	6	6	33	33	33	21.868	0	25.264	474350000	26	26.6769	26.4305	26.2185	25.5457	25.5084	25.6985
+	2.93282	0.73641	O75531	O75531	Barrier-to-autointegration factor;Barrier-to-autointegration factor, N-terminally processed	BANF1	Color2 [DarkGray]	1	4					5	5	5	58.4	58.4	58.4	10.058	0	22.402	1166200000	22	27.777	27.759	27.5961	26.9593	27.0988	26.8648
+	1.99622	-0.577623	O75533	O75533	Splicing factor 3B subunit 1	SF3B1	Color2 [DarkGray]	1	4					33	33	33	34.1	34.1	34.1	145.83	0	109.51	1151200000	100	26.8181	26.9835	27.1221	27.4653	27.7322	27.4591
+	4.63727	-0.607063	O75534	O75534	Cold shock domain-containing protein E1	CSDE1	Color2 [DarkGray]	1	4					21	21	21	31.5	31.5	31.5	88.884	0	107.69	811910000	74	26.4505	26.4381	26.5187	27.0809	27.057	27.0905
+	1.5942	1.94847	O75844	O75844	CAAX prenyl protease 1 homolog	ZMPSTE24	Color2 [DarkGray]	1	4					5	5	5	13.5	13.5	13.5	54.812	0	19.097	177100000	21	25.7132	24.9147	25.4121	23.6362	24.1381	22.4202
+	2.58214	-0.665206	O76031	O76031	ATP-dependent Clp protease ATP-binding subunit clpX-like, mitochondrial	CLPX	Color2 [DarkGray]	1	4					12	12	12	26.4	26.4	26.4	69.223	0	29.344	207030000	30	24.2547	24.593	24.4534	25.0908	25.1316	25.0743
+	2.31093	0.63741	O94826	O94826	Mitochondrial import receptor subunit TOM70	TOMM70A	Color2 [DarkGray]	1	4					10	10	10	20.1	20.1	20.1	67.454	0	29.061	258890000	32	25.621	25.3173	25.4313	24.8242	24.6947	24.9385
+	2.67289	-0.866436	O95864	O95864	Fatty acid desaturase 2	FADS2	Color2 [DarkGray]	1	4					11	11	10	27.7	27.7	26.1	52.259	0	35.866	970810000	42	26.3104	26.5364	26.6536	27.3392	27.4994	27.2611
+	2.20753	0.815348	O95994;Q8TD06	O95994	Anterior gradient protein 2 homolog	AGR2	Color2 [DarkGray]	1	4					8	8	8	59.4	59.4	59.4	19.979	0	90.053	1051900000	25	27.6657	27.7899	27.4105	26.7483	27.0141	26.6576
+	2.17685	0.536819	P05386	P05386	60S acidic ribosomal protein P1	RPLP1	Color2 [DarkGray]	1	4					5	4	4	94.7	79.8	79.8	11.514	0	280.16	6736000000	31	30.2164	30.1615	29.9745	29.6142	29.688	29.4397
+	2.93387	0.491929	P05387	P05387	60S acidic ribosomal protein P2	RPLP2	Color2 [DarkGray]	1	4					11	11	10	95.7	95.7	80.9	11.665	0	170.28	16113000000	85	31.4153	31.3377	31.3788	30.8405	30.9949	30.8207
+	3.27305	0.627176	P05388;Q8NHW5	P05388;Q8NHW5	60S acidic ribosomal protein P0;60S acidic ribosomal protein P0-like	RPLP0;RPLP0P6	Color2 [DarkGray]	1	4					16	16	16	53	53	53	34.273	0	151.39	12755000000	100	31.0788	31.069	31.1491	30.3948	30.5819	30.4387
+	1.94496	0.465757	P05556	P05556	Integrin beta-1	ITGB1	Color2 [DarkGray]	1	4					20	20	20	30.1	30.1	30.1	88.414	0	170.62	6681400000	130	30.121	29.9408	30.251	29.7343	29.6342	29.5471
+	3.26545	-0.323137	P08238;Q58FF7	P08238	Heat shock protein HSP 90-beta	HSP90AB1	Color2 [DarkGray]	1	4					52	32	29	66.7	45.6	42.1	83.263	0	323.31	54380000000	362	32.623	32.5306	32.6191	32.9018	32.9354	32.905
+	2.09552	-0.661745	P08243	P08243	Asparagine synthetase [glutamine-hydrolyzing]	ASNS	Color2 [DarkGray]	1	4					9	9	9	17.5	17.5	17.5	64.369	0	34.637	788410000	42	26.6116	26.2815	26.1749	27.0764	26.9732	27.0037
+	2.31926	0.627146	P08670;P17661;P41219;Q16352;P07196;P07197;P12036	P08670	Vimentin	VIM	Color2 [DarkGray]	1	4					48	48	46	80.5	80.5	78.5	53.651	0	323.31	64764000000	359	33.4361	33.44	33.4631	32.6954	33.0395	32.7229
+	2.23989	-1.22517	P08708	P08708	40S ribosomal protein S17	RPS17	Color2 [DarkGray]	1	4					8	8	8	57	57	57	15.55	0	146.1	3273200000	43	27.5874	28.1753	28.2051	29.2093	29.4014	29.0326
+	2.25764	0.444197	P08754	P08754	Guanine nucleotide-binding protein G(k) subunit alpha	GNAI3	Color2 [DarkGray]	1	4					12	12	6	41.2	41.2	22	40.532	0	72.91	896270000	48	27.1194	27.1179	27.2233	26.6971	26.8428	26.5882
+	2.16207	-0.679487	P08865	P08865	40S ribosomal protein SA	RPSA	Color2 [DarkGray]	1	4					16	16	16	63.4	63.4	63.4	32.854	0	309.83	13565000000	106	30.5964	30.277	30.5377	31.1756	31.29	30.9839
+	2.38729	-0.765889	P09601	P09601	Heme oxygenase 1	HMOX1	Color2 [DarkGray]	1	4					9	9	9	42.4	42.4	42.4	32.818	0	70.66	685220000	44	26.1167	25.9784	26.2892	27.0304	26.7156	26.936
+	3.59004	-0.742861	P0DMV9;P0DMV8	P0DMV9;P0DMV8	Heat shock 70 kDa protein 1B;Heat shock 70 kDa protein 1A	HSPA1B;HSPA1A	Color2 [DarkGray]	1	4					38	32	19	64.6	59	34	70.051	0	323.31	29617000000	263	31.5069	31.569	31.608	32.28	32.4059	32.2266
+	2.0921	-0.55677	P11908	P11908	Ribose-phosphate pyrophosphokinase 2	PRPS2	Color2 [DarkGray]	1	4					17	7	6	61.6	28.3	24.2	34.769	0	28.422	246730000	22	24.6387	24.8879	24.7205	25.1848	25.4747	25.2579
+	2.11003	-0.462034	P11940;Q9H361;Q4VXU2;Q96DU9	P11940;Q9H361	Polyadenylate-binding protein 1;Polyadenylate-binding protein 3	PABPC1;PABPC3	Color2 [DarkGray]	1	4					34	34	23	52.7	52.7	34.7	70.67	0	265.57	10020000000	213	30.0657	30.2703	30.1481	30.5944	30.76	30.5158
+	2.86315	0.487916	P12429	P12429	Annexin A3	ANXA3	Color2 [DarkGray]	1	4					21	21	21	65	65	65	36.375	0	181.2	3530300000	89	29.3115	29.1619	29.2402	28.8138	28.666	28.7699
+	3.00142	-0.851676	P12955	P12955	Xaa-Pro dipeptidase	PEPD	Color2 [DarkGray]	1	4					17	17	17	39.6	39.6	39.6	54.548	0	68.176	1774200000	83	27.599	27.3007	27.3266	28.2096	28.2791	28.2925
+	3.66997	0.75076	P13667	P13667	Protein disulfide-isomerase A4	PDIA4	Color2 [DarkGray]	1	4					38	38	38	54	54	54	72.932	0	267.1	6776100000	211	30.216	30.1554	30.3359	29.4975	29.5207	29.4369
+	3.52729	1.04153	P13693;Q9HAU6;Q56UQ5	P13693	Translationally-controlled tumor protein	TPT1	Color2 [DarkGray]	1	4					11	11	11	50	50	50	19.595	0	61.721	6056800000	75	30.1636	30.3476	30.107	29.2205	29.064	29.2092
+	2.83188	0.491942	P13797	P13797	Plastin-3	PLS3	Color2 [DarkGray]	1	4					36	36	28	63.3	63.3	50.5	70.81	0	323.31	11803000000	214	31.056	30.905	30.8559	30.4263	30.4856	30.4291
+	3.65485	-1.03139	P15880	P15880	40S ribosomal protein S2	RPS2	Color2 [DarkGray]	1	4					17	17	17	58	58	58	31.324	0	89.93	7447000000	107	29.2626	29.4794	29.3109	30.3739	30.3042	30.469
+	2.47683	1.68669	P17301	P17301	Integrin alpha-2	ITGA2	Color2 [DarkGray]	1	4					23	23	23	29.9	29.9	29.9	129.29	0	156.08	1435600000	86	28.2833	28.0017	28.7317	26.9671	26.5863	26.4032
+	2.22144	-0.406917	P17987	P17987	T-complex protein 1 subunit alpha	TCP1	Color2 [DarkGray]	1	4					28	28	28	62.1	62.1	62.1	60.343	0	323.31	7778200000	161	29.9311	29.8019	29.7879	30.2792	30.3339	30.1285
+	3.11515	0.581727	P18124	P18124	60S ribosomal protein L7	RPL7	Color2 [DarkGray]	1	4					18	18	18	55.6	55.6	55.6	29.225	0	112.95	11087000000	112	30.8394	30.9119	30.9752	30.3948	30.231	30.3555
+	3.02075	0.628366	P18621	P18621	60S ribosomal protein L17	RPL17	Color2 [DarkGray]	1	4					10	10	10	52.2	52.2	52.2	21.397	0	71.947	5483400000	81	30.0243	29.7944	29.91	29.2428	29.3358	29.265
+	2.26735	-0.596068	P20340;Q9NRW1;Q14964	P20340;Q9NRW1	Ras-related protein Rab-6A;Ras-related protein Rab-6B	RAB6A;RAB6B	Color2 [DarkGray]	1	4					7	7	7	34.6	34.6	34.6	23.593	0	33.247	2080100000	37	27.6741	27.8544	27.5648	28.1566	28.3659	28.359
+	2.64273	-0.767193	P22570	P22570	NADPH:adrenodoxin oxidoreductase, mitochondrial	FDXR	Color2 [DarkGray]	1	4					18	18	18	46.8	46.8	46.8	53.836	0	58.121	747380000	68	26.0765	26.3028	26.3439	26.8776	27.1305	27.0168
+	4.9093	-1.05185	P23396	P23396	40S ribosomal protein S3	RPS3	Color2 [DarkGray]	1	4					22	22	22	78.6	78.6	78.6	26.688	0	135.44	6177900000	139	29.0684	29.0839	29.1269	30.0826	30.1453	30.2069
+	1.80502	-1.31247	P23921	P23921	Ribonucleoside-diphosphate reductase large subunit	RRM1	Color2 [DarkGray]	1	4					20	20	20	33.6	33.6	33.6	90.069	0	95.884	879160000	64	26.3459	26.3056	25.3968	27.4886	27.3489	27.1482
+	2.61914	1.07891	P24534	P24534	Elongation factor 1-beta	EEF1B2	Color2 [DarkGray]	1	4					9	8	8	50.7	47.6	47.6	24.763	0	167.96	5804800000	55	29.9923	30.1776	30.3322	28.8889	29.0617	29.3148
+	3.52157	-1.2899	P25398	P25398	40S ribosomal protein S12	RPS12	Color2 [DarkGray]	1	4					8	8	8	70.5	70.5	70.5	14.515	0	126.51	4427400000	53	28.4438	28.562	28.2431	29.5905	29.7509	29.7772
+	2.27536	-0.419795	P25685	P25685	DnaJ homolog subfamily B member 1	DNAJB1	Color2 [DarkGray]	1	4					11	11	10	34.1	34.1	30.6	38.044	0	67.76	1038900000	57	27.0223	26.7967	26.8064	27.2889	27.3317	27.2642
+	3.34971	0.783875	P26006	P26006	Integrin alpha-3;Integrin alpha-3 heavy chain;Integrin alpha-3 light chain	ITGA3	Color2 [DarkGray]	1	4					21	21	21	22.4	22.4	22.4	116.61	0	134.57	4081200000	118	29.6066	29.3963	29.5585	28.8076	28.7225	28.6796
+	2.18971	0.604383	P26373	P26373	60S ribosomal protein L13	RPL13	Color2 [DarkGray]	1	4					11	11	11	44.5	44.5	44.5	24.261	0	56.227	8590300000	68	30.5617	30.4393	30.6465	29.9369	29.7772	30.1203
+	3.90259	0.850344	P26641	P26641	Elongation factor 1-gamma	EEF1G	Color2 [DarkGray]	1	4					23	23	23	57	57	57	50.118	0	218.88	12420000000	163	31.1638	31.1239	31.245	30.2559	30.4123	30.3135
+	1.81053	0.706812	P27635;Q96L21	P27635	60S ribosomal protein L10	RPL10	Color2 [DarkGray]	1	4					10	10	10	43	43	43	24.604	0	162.23	9032100000	84	30.8686	30.4976	30.5682	29.9813	29.6902	30.1425
+	2.20298	0.769011	P29317;P54764;P54760;P54753	P29317	Ephrin type-A receptor 2	EPHA2	Color2 [DarkGray]	1	4					13	13	12	14.5	14.5	13.4	108.27	0	32.903	353100000	41	25.8442	26.2521	25.8559	25.2754	25.2718	25.0981
+	2.53266	0.552876	P29692	P29692	Elongation factor 1-delta	EEF1D	Color2 [DarkGray]	1	4					13	13	12	58.4	58.4	55.9	31.121	0	169.66	8398900000	68	30.5318	30.3685	30.5818	30.0181	29.8321	29.9734
+	3.68017	-0.278851	P30041	P30041	Peroxiredoxin-6	PRDX6	Color2 [DarkGray]	1	4					20	20	20	83	83	83	25.035	0	214.63	15153000000	131	30.8633	30.9342	30.8839	31.1742	31.1803	31.1634
+	2.18121	0.694097	P30050	P30050	60S ribosomal protein L12	RPL12	Color2 [DarkGray]	1	4					9	9	9	63.6	63.6	63.6	17.818	0	89.667	6831600000	59	30.2332	30.1904	30.2351	29.717	29.5898	29.2696
+	2.67472	-0.501603	P30520	P30520	Adenylosuccinate synthetase isozyme 2	ADSS	Color2 [DarkGray]	1	4					14	14	14	35.1	35.1	35.1	50.097	0	66.324	1123200000	55	26.9801	27.0297	26.8224	27.4394	27.3908	27.5068
+	3.45677	0.745818	P32969	P32969	60S ribosomal protein L9	RPL9	Color2 [DarkGray]	1	4					12	12	12	70.3	70.3	70.3	21.863	0	285.74	6730700000	81	30.1616	30.2805	30.3369	29.432	29.5494	29.5602
+	2.73775	0.507137	P36578	P36578	60S ribosomal protein L4	RPL4	Color2 [DarkGray]	1	4					25	25	25	51.3	51.3	51.3	47.697	0	194.05	14055000000	164	31.2707	31.2589	31.0878	30.6278	30.7415	30.7268
+	3.37655	-0.355717	P36957	P36957	Dihydrolipoyllysine-residue succinyltransferase component of 2-oxoglutarate dehydrogenase complex, mitochondrial	DLST	Color2 [DarkGray]	1	4					9	9	9	21.2	21.2	21.2	48.755	0	36.593	833400000	34	26.6471	26.7115	26.6169	27.0111	27.0463	26.9853
+	2.40807	-1.08644	P39019	P39019	40S ribosomal protein S19	RPS19	Color2 [DarkGray]	1	4					13	13	13	55.9	55.9	55.9	16.06	0	57.374	4977700000	76	28.5403	29.0108	28.6687	29.6172	29.8489	30.013
+	3.56274	0.554781	P39023;Q92901	P39023	60S ribosomal protein L3	RPL3	Color2 [DarkGray]	1	4					26	26	26	54.6	54.6	54.6	46.108	0	212.86	14449000000	163	31.2041	31.2247	31.3508	30.7078	30.7119	30.6956
+	1.89088	-0.526545	P39687;O95626;O43423	P39687	Acidic leucine-rich nuclear phosphoprotein 32 family member A	ANP32A	Color2 [DarkGray]	1	4					10	10	7	34.5	34.5	31.7	28.585	0	129.04	4923200000	67	28.9405	29.0095	29.2974	29.6415	29.6865	29.499
+	2.77917	-0.429035	P40227;Q92526	P40227	T-complex protein 1 subunit zeta	CCT6A	Color2 [DarkGray]	1	4					26	26	26	58.4	58.4	58.4	58.024	0	323.31	11602000000	150	30.3757	30.3222	30.5069	30.857	30.8043	30.8305
+	3.2132	-0.541391	P42677	P42677	40S ribosomal protein S27	RPS27	Color2 [DarkGray]	1	4					5	5	3	40.5	40.5	15.5	9.461	0	37.542	1753600000	29	27.7219	27.5451	27.6719	28.1619	28.2203	28.1809
+	2.66071	0.540874	P42766	P42766	60S ribosomal protein L35	RPL35	Color2 [DarkGray]	1	4					4	4	4	26	26	26	14.551	0	27.345	4054700000	31	29.4909	29.408	29.3536	28.7737	28.9999	28.8564
+	2.22387	0.503124	P46108	P46108	Adapter molecule crk	CRK	Color2 [DarkGray]	1	4					9	9	9	40.5	40.5	40.5	33.83	0	33.572	516570000	38	26.3624	26.4838	26.4893	25.8691	26.1113	25.8458
+	4.84402	-1.13712	P46781	P46781	40S ribosomal protein S9	RPS9	Color2 [DarkGray]	1	4					15	15	15	51	51	51	22.591	0	43.754	5880800000	95	28.9031	28.9657	28.9842	30.1435	30.0166	30.1044
+	2.06509	-0.903478	P46782	P46782	40S ribosomal protein S5;40S ribosomal protein S5, N-terminally processed	RPS5	Color2 [DarkGray]	1	4					14	14	14	54.9	54.9	54.9	22.876	0	127.75	7343400000	69	29.3431	29.3183	29.6497	30.4575	30.0337	30.5304
+	2.50428	-0.827638	P46783;Q9NQ39	P46783;Q9NQ39	40S ribosomal protein S10;Putative 40S ribosomal protein S10-like	RPS10;RPS10P5	Color2 [DarkGray]	1	4					9	8	8	53.3	49.1	49.1	18.898	0	60.738	5200900000	70	29.0775	28.7519	29.1607	29.8885	29.7603	29.8242
+	2.20308	0.651927	P46934	P46934	E3 ubiquitin-protein ligase NEDD4	NEDD4	Color2 [DarkGray]	1	4					11	11	10	11.8	11.8	10.8	149.11	0	47.417	369180000	36	26.2459	25.9411	25.8675	25.4464	25.2938	25.3584
+	1.84279	-0.540473	P47813	P47813	Eukaryotic translation initiation factor 1A, X-chromosomal	EIF1AX	Color2 [DarkGray]	1	4					8	8	2	44.4	44.4	7.6	16.46	0	46.459	892040000	29	26.4466	26.7488	26.6501	27.1413	27.3278	26.9979
+	2.23245	-0.536162	P48643	P48643	T-complex protein 1 subunit epsilon	CCT5	Color2 [DarkGray]	1	4					33	33	33	70.8	70.8	70.8	59.67	0	323.31	13515000000	224	30.4102	30.5798	30.6657	30.9986	31.2173	31.0482
+	1.58274	-0.824828	P49247	P49247	Ribose-5-phosphate isomerase	RPIA	Color2 [DarkGray]	1	4					7	7	7	31.5	31.5	31.5	33.269	0	26.719	216010000	24	24.7831	24.2974	24.2724	24.9317	25.458	25.4378
+	2.8509	-0.48514	P50990	P50990	T-complex protein 1 subunit theta	CCT8	Color2 [DarkGray]	1	4					37	37	37	74.8	74.8	74.8	59.62	0	214.6	10251000000	179	30.1043	30.2981	30.1964	30.6828	30.7304	30.641
+	2.69997	0.812677	P51149	P51149	Ras-related protein Rab-7a	RAB7A	Color2 [DarkGray]	1	4					14	14	14	71.5	71.5	71.5	23.489	0	110.82	2557900000	70	29.0003	28.675	28.9432	28.1575	27.9769	28.046
+	2.57238	-0.543165	P51648	P51648	Fatty aldehyde dehydrogenase	ALDH3A2	Color2 [DarkGray]	1	4					19	18	18	47.2	44.7	44.7	54.847	0	97.826	3112200000	101	28.2794	28.4054	28.554	28.9402	28.9959	28.9322
+	3.2497	-1.10322	P52272	P52272	Heterogeneous nuclear ribonucleoprotein M	HNRNPM	Color2 [DarkGray]	1	4					35	35	35	56.7	56.7	56.7	77.515	0	151.01	2922700000	123	27.8958	27.8006	28.1201	28.9288	29.1014	29.096
+	2.94987	-0.547137	P52895	P52895	Aldo-keto reductase family 1 member C2	AKR1C2	Color2 [DarkGray]	1	4					25	19	7	79.9	69.7	25.7	36.735	0	323.31	87659000000	305	33.3258	33.1239	33.2498	33.7321	33.7775	33.8314
+	2.98184	0.940418	P55010	P55010	Eukaryotic translation initiation factor 5	EIF5	Color2 [DarkGray]	1	4					14	14	14	36.9	36.9	36.9	49.222	0	86.615	2592600000	71	29.1508	28.9151	28.7855	27.9769	28.0647	27.9884
+	1.79954	-1.09099	P60866	P60866	40S ribosomal protein S20	RPS20	Color2 [DarkGray]	1	4					5	5	5	29.4	29.4	29.4	13.373	0	41.424	2650000000	52	27.6195	27.653	28.1878	29.2145	28.5353	28.9835
+	3.81212	-0.937068	P61247	P61247	40S ribosomal protein S3a	RPS3A	Color2 [DarkGray]	1	4					17	17	17	56.4	56.4	56.4	29.945	0	128.1	9232800000	113	29.6868	29.7045	29.8317	30.7309	30.5793	30.7241
+	1.75932	0.715532	P61313	P61313	60S ribosomal protein L15	RPL15	Color2 [DarkGray]	1	4					11	11	11	42.2	42.2	42.2	24.146	0	55.006	7829400000	73	30.4369	30.4672	30.4336	29.8831	29.3665	29.9415
+	1.79852	-0.970408	P62241	P62241	40S ribosomal protein S8	RPS8	Color2 [DarkGray]	1	4					12	12	12	55.8	55.8	55.8	24.205	0	116.71	5806800000	72	29.2033	29.2956	28.6203	29.7914	30.0479	30.1911
+	2.21499	-1.02246	P62244	P62244	40S ribosomal protein S15a	RPS15A	Color2 [DarkGray]	1	4					8	8	8	63.8	63.8	63.8	14.839	0	58.634	2759800000	44	27.5441	28.1137	28.0232	28.762	28.9786	29.0078
+	4.15526	-1.2104	P62249	P62249	40S ribosomal protein S16	RPS16	Color2 [DarkGray]	1	4					13	13	13	67.1	67.1	67.1	16.445	0	44.823	3800000000	82	28.1626	28.3218	28.3451	29.4357	29.5704	29.4547
+	3.3906	-1.32465	P62263	P62263	40S ribosomal protein S14	RPS14	Color2 [DarkGray]	1	4					10	10	10	68.2	68.2	68.2	16.273	0	152.08	3600000000	62	27.8881	28.2474	28.1441	29.3727	29.5344	29.3465
+	1.56246	-0.690372	P62266	P62266	40S ribosomal protein S23	RPS23	Color2 [DarkGray]	1	4					5	5	5	43.4	43.4	43.4	15.807	0	21.33	1718500000	20	27.8182	27.2117	27.3724	28.3413	28.0599	28.0723
+	2.8873	-1.15487	P62269	P62269	40S ribosomal protein S18	RPS18	Color2 [DarkGray]	1	4					13	13	13	59.2	59.2	59.2	17.718	0	47.103	5378700000	58	28.6445	28.7905	29.0615	30.0368	29.8389	30.0855
+	1.37566	-0.990911	P62273	P62273	40S ribosomal protein S29	RPS29	Color2 [DarkGray]	1	4					4	4	4	48.2	48.2	48.2	6.6767	0	23.43	1625800000	25	27.2939	26.7329	27.643	28.0809	27.9415	28.62
+	3.27961	-1.25378	P62277	P62277	40S ribosomal protein S13	RPS13	Color2 [DarkGray]	1	4					11	11	11	54.3	54.3	54.3	17.222	0	56.795	5286300000	55	28.525	28.7918	28.7959	29.7935	30.0742	30.0062
+	2.14402	-0.983512	P62280	P62280	40S ribosomal protein S11	RPS11	Color2 [DarkGray]	1	4					14	14	14	62.7	62.7	62.7	18.431	0	60.154	5931500000	72	28.9082	29.0536	29.1531	30.1887	29.6604	30.2163
+	3.124	-0.971177	P62701;Q8TD47;P22090	P62701	40S ribosomal protein S4, X isoform	RPS4X	Color2 [DarkGray]	1	4					20	20	20	63.9	63.9	63.9	29.597	0	97.732	8980100000	120	29.6337	29.5941	29.7987	30.6939	30.4837	30.7626
+	1.80168	-0.878712	P62753	P62753	40S ribosomal protein S6	RPS6	Color2 [DarkGray]	1	4					10	10	10	32.9	32.9	32.9	28.68	0	64.168	2633100000	40	27.8914	28.2879	27.6122	28.6254	28.8532	28.949
+	2.22399	-1.17251	P62847	P62847	40S ribosomal protein S24	RPS24	Color2 [DarkGray]	1	4					6	6	6	40.6	40.6	40.6	15.423	0	44.292	4249700000	44	28.0622	28.5801	28.7117	29.8076	29.577	29.4869
+	2.7622	-1.20356	P62851	P62851	40S ribosomal protein S25	RPS25	Color2 [DarkGray]	1	4					5	5	5	29.6	29.6	29.6	13.742	0	20.032	2962900000	36	27.6927	28.2366	27.8584	29.109	29.1412	29.1481
+	1.60469	-0.751387	P62854;Q5JNZ5	P62854;Q5JNZ5	40S ribosomal protein S26;Putative 40S ribosomal protein S26-like 1	RPS26;RPS26P11	Color2 [DarkGray]	1	4					4	4	4	37.4	37.4	37.4	13.015	0	23.115	2956800000	24	28.1844	28.0064	28.4063	29.1839	28.5948	29.0726
+	1.77285	-0.695215	P62857	P62857	40S ribosomal protein S28	RPS28	Color2 [DarkGray]	1	4					3	3	3	46.4	46.4	46.4	7.8409	0	34.019	3037300000	18	28.5174	28.0308	28.4696	28.9623	29.202	28.9392
+	2.39747	0.682828	P62888	P62888	60S ribosomal protein L30	RPL30	Color2 [DarkGray]	1	4					7	7	7	66.1	66.1	66.1	12.784	0	60.412	5760600000	53	29.9532	30.0819	29.9344	29.3647	29.1033	29.453
+	2.01213	0.702158	P62910	P62910	60S ribosomal protein L32	RPL32	Color2 [DarkGray]	1	4					11	11	11	54.1	54.1	54.1	15.86	0	53.929	6757400000	71	30.19	30.2392	30.3029	29.7788	29.2706	29.5762
+	1.88488	-1.23287	P63220	P63220	40S ribosomal protein S21	RPS21	Color2 [DarkGray]	1	4					6	6	6	63.9	63.9	63.9	9.1113	0	106.12	1784500000	45	26.739	27.3821	27.3666	28.6338	28.0045	28.5481
+	3.20592	-1.06847	P63244	P63244	Guanine nucleotide-binding protein subunit beta-2-like 1;Guanine nucleotide-binding protein subunit beta-2-like 1, N-terminally processed	GNB2L1	Color2 [DarkGray]	1	4					20	20	20	81.1	81.1	81.1	35.076	0	205.89	10467000000	117	29.6731	29.8539	29.9832	30.8148	31.026	30.8747
+	1.96608	-0.989927	P78330	P78330	Phosphoserine phosphatase	PSPH	Color2 [DarkGray]	1	4					6	6	6	26.7	26.7	26.7	25.007	0	19.287	379320000	23	25.0263	25.341	25.0552	25.8886	26.518	25.9856
+	1.90463	-0.640122	P78417	P78417	Glutathione S-transferase omega-1	GSTO1	Color2 [DarkGray]	1	4					14	14	14	58.9	58.9	58.9	27.566	0	88.503	3438700000	92	28.3397	28.5085	28.8045	29.3096	29.1291	29.1344
+	1.74813	0.988326	P84095;P17081;Q9H4E5	P84095	Rho-related GTP-binding protein RhoG	RHOG	Color2 [DarkGray]	1	4					7	6	6	57.1	51.3	51.3	21.308	0	47.963	273310000	22	25.7111	25.5655	25.8963	25.0382	24.2706	24.8991
+	2.78957	0.380793	Q00534	Q00534	Cyclin-dependent kinase 6	CDK6	Color2 [DarkGray]	1	4					9	8	8	35.9	33.4	33.4	36.938	0	28.824	327640000	35	25.6928	25.6353	25.7991	25.2986	25.3434	25.3428
+	2.80983	0.494943	Q01813	Q01813	ATP-dependent 6-phosphofructokinase, platelet type	PFKP	Color2 [DarkGray]	1	4					37	37	34	48.1	48.1	43.4	85.595	0	323.31	20495000000	261	31.7924	31.7027	31.7336	31.3541	31.1507	31.2391
+	2.31336	-0.381207	Q02818	Q02818	Nucleobindin-1	NUCB1	Color2 [DarkGray]	1	4					17	17	16	45.1	45.1	43.4	53.879	0	74.68	1170100000	68	27.066	27.2175	27.0968	27.5908	27.4204	27.5127
+	1.92572	0.643615	Q02878	Q02878	60S ribosomal protein L6	RPL6	Color2 [DarkGray]	1	4					17	17	17	47.9	47.9	47.9	32.728	0	138.83	12105000000	129	31.0364	30.911	31.1714	30.5224	30.1436	30.522
+	2.42259	0.853919	Q02952	Q02952	A-kinase anchor protein 12	AKAP12	Color2 [DarkGray]	1	4					29	29	29	27.3	27.3	27.3	191.48	0	122.16	878110000	74	27.3698	27.1273	27.5901	26.5952	26.4394	26.4908
+	1.8131	-0.706266	Q0VDF9	Q0VDF9	Heat shock 70 kDa protein 14	HSPA14	Color2 [DarkGray]	1	4					4	4	4	9	9	9	54.794	0	11.318	155670000	17	23.8523	24.246	23.7477	24.6479	24.8061	24.5108
+	2.63539	0.623017	Q12860	Q12860	Contactin-1	CNTN1	Color2 [DarkGray]	1	4					14	14	14	17.8	17.8	17.8	113.32	0	45.633	519670000	43	26.6415	26.3811	26.4371	25.9066	25.9074	25.7766
+	1.76712	-0.878587	Q12907	Q12907	Vesicular integral-membrane protein VIP36	LMAN2	Color2 [DarkGray]	1	4					10	10	10	39.3	39.3	39.3	40.228	0	50.033	653240000	32	25.7242	26.2925	25.7044	26.8677	26.5621	26.9271
+	2.17815	0.583785	Q12979;P11274	Q12979	Active breakpoint cluster region-related protein	ABR	Color2 [DarkGray]	1	4					12	12	12	17.9	17.9	17.9	97.597	0	46.165	282630000	34	25.4115	25.6675	25.7802	25.0907	24.9926	25.0245
+	2.02937	-0.485238	Q13011	Q13011	Delta(3,5)-Delta(2,4)-dienoyl-CoA isomerase, mitochondrial	ECH1	Color2 [DarkGray]	1	4					15	15	15	65.5	65.5	65.5	35.816	0	167.81	4112600000	64	28.6942	28.9625	28.8871	29.2807	29.2552	29.4635
+	2.25394	-0.394809	Q13442	Q13442	28 kDa heat- and acid-stable phosphoprotein	PDAP1	Color2 [DarkGray]	1	4					7	7	7	31.5	31.5	31.5	20.63	0	28.789	570900000	37	26.0776	26.1338	25.9891	26.5736	26.372	26.4393
+	2.16011	0.460523	Q13509	Q13509	Tubulin beta-3 chain	TUBB3	Color2 [DarkGray]	1	4					24	11	8	62.7	37.1	30.4	50.432	0	224.52	8399400000	69	30.5345	30.238	30.4677	29.9404	29.9555	29.9628
+	2.1407	0.764384	Q13867	Q13867	Bleomycin hydrolase	BLMH	Color2 [DarkGray]	1	4					10	10	10	35.4	35.4	35.4	52.562	0	59.791	811790000	33	27.3095	27.2711	27.0372	26.6794	26.3904	26.2549
+	2.5022	0.460072	Q14204	Q14204	Cytoplasmic dynein 1 heavy chain 1	DYNC1H1	Color2 [DarkGray]	1	4					148	148	148	38.8	38.8	38.8	532.4	0	323.31	9634300000	558	30.7518	30.6102	30.587	30.2184	30.0906	30.2598
+	1.68926	-0.596008	Q14914	Q14914	Prostaglandin reductase 1	PTGR1	Color2 [DarkGray]	1	4					16	16	16	53.5	53.5	53.5	35.869	0	164.09	4131200000	84	28.494	29.0291	28.8394	29.4132	29.4204	29.3168
+	2.28955	0.582306	Q15404	Q15404	Ras suppressor protein 1	RSU1	Color2 [DarkGray]	1	4					6	6	6	22.4	22.4	22.4	31.54	0	19.106	269650000	24	25.4694	25.6361	25.558	25.1015	24.7916	25.0235
+	1.93859	0.662598	Q56VL3	Q56VL3	OCIA domain-containing protein 2	OCIAD2	Color2 [DarkGray]	1	4					4	4	4	26	26	26	16.953	0	13.774	204330000	16	24.9115	25.4106	25.1159	24.4664	24.5573	24.4266
+	1.88141	0.563007	Q5GLZ8	Q5GLZ8	Probable E3 ubiquitin-protein ligase HERC4	HERC4	Color2 [DarkGray]	1	4					24	24	24	33.8	33.8	33.8	118.56	0	70.535	617870000	66	26.9032	26.6529	26.5269	26.2727	26.03	26.0914
+	1.9523	-0.693551	Q6FI81	Q6FI81	Anamorsin	CIAPIN1	Color2 [DarkGray]	1	4					13	13	13	46.2	46.2	46.2	33.582	0	54.385	506160000	41	25.7975	25.6643	25.5467	26.3233	26.6188	26.1471
+	2.10928	-0.433381	Q7L1Q6	Q7L1Q6	Basic leucine zipper and W2 domain-containing protein 1	BZW1	Color2 [DarkGray]	1	4					12	12	11	23.9	23.9	22.2	48.043	0	24.448	635330000	40	26.2732	26.0552	26.21	26.6686	26.495	26.6751
+	2.07526	0.532405	Q7L5N1	Q7L5N1	COP9 signalosome complex subunit 6	COPS6	Color2 [DarkGray]	1	4					9	9	9	40.1	40.1	40.1	36.163	0	60.071	433840000	28	26.2849	26.1045	26.2524	25.7005	25.5083	25.8357
+	1.60873	0.710649	Q8NBJ7	Q8NBJ7	Sulfatase-modifying factor 2	SUMF2	Color2 [DarkGray]	1	4					5	5	5	21.9	21.9	21.9	33.843	0	20.343	239000000	20	25.5826	25.3932	25.0501	24.8543	24.6322	24.4073
+	2.75309	0.476288	Q8TEX9	Q8TEX9	Importin-4	IPO4	Color2 [DarkGray]	1	4					23	23	23	26.2	26.2	26.2	118.71	0	180.62	1477400000	75	28.0428	27.8415	27.9173	27.4933	27.4727	27.4068
+	1.52971	-0.732341	Q8WU90	Q8WU90	Zinc finger CCCH domain-containing protein 15	ZC3H15	Color2 [DarkGray]	1	4					9	9	9	29.3	29.3	29.3	48.602	0	67.621	423540000	37	25.7618	25.2651	25.116	26.0168	26.3201	26.003
+	2.65072	-0.493269	Q92688	Q92688	Acidic leucine-rich nuclear phosphoprotein 32 family member B	ANP32B	Color2 [DarkGray]	1	4					9	6	6	35.1	20.7	20.7	28.787	0	27.577	2929000000	77	28.058	28.1996	28.2533	28.7335	28.6632	28.5939
+	2.82694	0.525027	Q93052	Q93052	Lipoma-preferred partner	LPP	Color2 [DarkGray]	1	4					21	21	21	48.9	48.9	48.9	65.746	0	106.84	1521100000	98	28.026	27.9635	27.9651	27.4891	27.5539	27.3364
+	1.61178	0.653491	Q96AY3	Q96AY3	Peptidyl-prolyl cis-trans isomerase FKBP10	FKBP10	Color2 [DarkGray]	1	4					9	9	8	16.8	16.8	15.6	64.244	0	30.427	447090000	30	26.0013	26.4861	26.4043	25.5298	25.8629	25.5385
+	2.28881	0.568684	Q96KP4	Q96KP4	Cytosolic non-specific dipeptidase	CNDP2	Color2 [DarkGray]	1	4					21	21	21	58.9	58.9	58.9	52.878	0	114.14	1812500000	84	28.3956	28.1526	28.2743	27.5923	27.8462	27.6779
+	2.39093	0.495838	Q99536	Q99536	Synaptic vesicle membrane protein VAT-1 homolog	VAT1	Color2 [DarkGray]	1	4					22	22	22	70.5	70.5	70.5	41.92	0	217.12	5084900000	119	29.5846	29.7626	29.8671	29.2685	29.2198	29.2385
+	1.89896	-0.838417	Q99653	Q99653	Calcineurin B homologous protein 1	CHP1	Color2 [DarkGray]	1	4					9	9	9	51.8	51.8	51.8	22.456	0	30.765	381620000	30	25.3458	25.2642	24.9056	26.0365	26.2391	25.7552
+	1.76682	-0.695638	Q99816	Q99816	Tumor susceptibility gene 101 protein	TSG101	Color2 [DarkGray]	1	4					7	7	7	22.8	22.8	22.8	43.944	0	30.641	166300000	25	24.3122	23.8022	24.0687	24.6817	24.9514	24.6369
+	2.62171	-0.346334	Q99832	Q99832	T-complex protein 1 subunit eta	CCT7	Color2 [DarkGray]	1	4					32	32	32	68.9	68.9	68.9	59.366	0	323.31	8916400000	151	30.1334	29.9644	30.0596	30.4207	30.3756	30.4002
+	1.67823	-0.675225	Q9BSH4	Q9BSH4	Translational activator of cytochrome c oxidase 1	TACO1	Color2 [DarkGray]	1	4					4	4	4	17.2	17.2	17.2	32.477	0	23.997	275280000	24	24.6514	25.0329	24.7246	25.4551	25.7325	25.2469
+	2.63495	-0.660726	Q9BYN0	Q9BYN0	Sulfiredoxin-1	SRXN1	Color2 [DarkGray]	1	4					4	4	4	43.8	43.8	43.8	14.259	0	11.977	134580000	14	23.9371	24.0175	23.7275	24.5112	24.6374	24.5158
+	1.51487	-0.729209	Q9HAV7	Q9HAV7	GrpE protein homolog 1, mitochondrial	GRPEL1	Color2 [DarkGray]	1	4					5	5	5	30	30	30	24.279	0	18.531	511240000	28	25.3085	25.8629	25.9491	26.4301	26.6051	26.2729
+	1.61743	-0.797805	Q9HCC0	Q9HCC0	Methylcrotonoyl-CoA carboxylase beta chain, mitochondrial	MCCC2	Color2 [DarkGray]	1	4					11	11	11	25.4	25.4	25.4	61.332	0	44.921	261150000	22	24.5315	24.6812	24.6481	25.7428	25.5156	24.9958
+	2.81739	0.839209	Q9NUQ9;Q9H0Q0	Q9NUQ9	Protein FAM49B	FAM49B	Color2 [DarkGray]	1	4					9	9	9	33.3	33.3	33.3	36.748	0	68.497	738160000	28	27.3183	27.0025	27.0023	26.2273	26.3207	26.2574
+	1.65393	1.00626	Q9P258	Q9P258	Protein RCC2	RCC2	Color2 [DarkGray]	1	4					11	11	11	25.1	25.1	25.1	56.084	0	27.093	215880000	35	25.1114	25.6235	25.3259	24.741	23.9307	24.3704
+	1.59734	-0.790464	Q9UI30	Q9UI30	Multifunctional methyltransferase subunit TRM112-like protein	TRMT112	Color2 [DarkGray]	1	4					6	6	6	66.4	66.4	66.4	14.199	0	30.29	485070000	21	25.5854	25.9767	25.2744	26.2015	26.5205	26.4859
+	2.55969	0.47714	Q9UK76	Q9UK76	Hematological and neurological expressed 1 protein;Hematological and neurological expressed 1 protein, N-terminally processed	HN1	Color2 [DarkGray]	1	4					6	6	6	46.8	46.8	46.8	16.014	0	120.36	2458800000	47	28.6669	28.7823	28.543	28.1861	28.1494	28.2252
+	1.6883	0.577195	Q9ULC4	Q9ULC4	Malignant T-cell-amplified sequence 1	MCTS1	Color2 [DarkGray]	1	4					7	7	7	49.7	49.7	49.7	20.555	0	42.858	524640000	24	26.6298	26.2257	26.7292	25.981	25.9143	25.9578
+	2.80371	-0.647358	Q9Y2Z0	Q9Y2Z0	Suppressor of G2 allele of SKP1 homolog	SUGT1	Color2 [DarkGray]	1	4					12	12	12	45.5	45.5	45.5	41.024	0	46.706	735060000	46	26.295	26.3142	26.1118	26.9602	26.9225	26.7802
+	1.67327	0.787894	Q9Y3C8	Q9Y3C8	Ubiquitin-fold modifier-conjugating enzyme 1	UFC1	Color2 [DarkGray]	1	4					5	5	5	28.7	28.7	28.7	19.458	0	11.989	176370000	22	24.9386	24.8847	25.0572	24.2176	24.5077	23.7915
+	1.95994	-0.642995	Q9Y5K5	Q9Y5K5	Ubiquitin carboxyl-terminal hydrolase isozyme L5	UCHL5	Color2 [DarkGray]	1	4					12	12	12	41	41	41	37.606	0	52.437	336080000	36	25.1857	25.2657	24.8235	25.6966	25.6822	25.8251
+	3.42483	-0.530574	Q9Y617	Q9Y617	Phosphoserine aminotransferase	PSAT1	Color2 [DarkGray]	1	4					17	17	17	52.4	52.4	52.4	40.422	0	101.22	4207000000	109	28.859	28.8823	28.9243	29.4476	29.4767	29.333
	0.0508445	0.0192782	A0AVT1	A0AVT1	Ubiquitin-like modifier-activating enzyme 6	UBA6	Color2 [DarkGray]	1	4					21	21	21	24.7	24.7	24.7	117.97	0	70.356	671340000	68	26.597	26.6258	26.312	26.3433	26.6315	26.5022
	1.06922	0.30482	A0FGR8	A0FGR8	Extended synaptotagmin-2	ESYT2	Color2 [DarkGray]	1	4					9	9	9	12.4	12.4	12.4	102.36	0	26.088	217570000	28	24.95	25.3484	25.0647	24.7616	24.9414	24.7458
	0.804239	-0.545012	A0MZ66	A0MZ66	Shootin-1	KIAA1598	Color2 [DarkGray]	1	4					12	12	12	21.7	21.7	21.7	71.639	0	42.942	286470000	31	24.3531	25.2303	25.1456	25.4136	25.7184	25.232
	0.119682	0.0709712	A5YKK6	A5YKK6	CCR4-NOT transcription complex subunit 1	CNOT1	Color2 [DarkGray]	1	4					23	23	23	12.6	12.6	12.6	266.94	0	57.236	317570000	53	25.856	25.2378	25.3679	25.5972	25.4228	25.2289
	1.26301	-0.330209	Q9GZQ8;A6NCE7;Q9H492	Q9GZQ8;A6NCE7;Q9H492	Microtubule-associated proteins 1A/1B light chain 3B;Microtubule-associated proteins 1A/1B light chain 3 beta 2;Microtubule-associated proteins 1A/1B light chain 3A	MAP1LC3B;MAP1LC3B2;MAP1LC3A	Color2 [DarkGray]	1	4					2	2	2	16.8	16.8	16.8	14.688	0	7.2182	310450000	13	25.2478	25.1301	25.4042	25.5108	25.7774	25.4845
	0.0541861	-0.0319131	A6NDG6	A6NDG6	Phosphoglycolate phosphatase	PGP	Color2 [DarkGray]	1	4					9	9	9	36.1	36.1	36.1	34.006	0	65.252	675660000	45	26.9101	26.2337	26.4491	26.5192	26.5318	26.6377
	0.169012	0.145253	Q13765;E9PAV3;Q9BZK3	Q13765;E9PAV3	Nascent polypeptide-associated complex subunit alpha;Nascent polypeptide-associated complex subunit alpha, muscle-specific form	NACA	Color2 [DarkGray]	1	4					5	5	5	32.6	32.6	32.6	23.384	0	71.717	3644300000	45	29.2822	29.4208	28.5089	28.6898	28.8618	29.2245
	0.769426	0.245359	O00116	O00116	Alkyldihydroxyacetonephosphate synthase, peroxisomal	AGPS	Color2 [DarkGray]	1	4					15	15	15	34	34	34	72.911	0	53.905	776610000	45	27.0424	26.6877	26.7839	26.7701	26.5899	26.4179
	0.794078	-0.0754038	O00151	O00151	PDZ and LIM domain protein 1	PDLIM1	Color2 [DarkGray]	1	4					20	20	20	83.3	83.3	83.3	36.071	0	285.17	4961700000	129	29.4389	29.4531	29.3192	29.4693	29.5012	29.467
	0.106709	-0.053098	O00154;Q6ZUV0	O00154	Cytosolic acyl coenzyme A thioester hydrolase	ACOT7	Color2 [DarkGray]	1	4					11	11	11	34.2	34.2	34.2	41.796	0	53.673	1139500000	44	27.1778	27.6224	27.1116	27.5153	27.3052	27.2505
	1.21873	0.148877	O00159	O00159	Unconventional myosin-Ic	MYO1C	Color2 [DarkGray]	1	4					35	35	34	35.6	35.6	34.9	121.68	0	226.34	3833200000	160	29.1803	29.0622	29.1553	29.0561	28.9931	28.902
	0.150388	-0.335393	O00170	O00170	AH receptor-interacting protein	AIP	Color2 [DarkGray]	1	4					9	9	9	33.3	33.3	33.3	37.636	0	23.618	140180000	19	24.4593	22.4295	24.1017	24.6681	24.4154	22.9132
	0.348013	-0.402576	O00186	O00186	Syntaxin-binding protein 3	STXBP3	Color2 [DarkGray]	1	4					8	8	8	14.2	14.2	14.2	67.764	0	16.601	106180000	19	22.5852	24.1531	23.8023	24.0349	23.8006	23.913
	0.0297012	-0.16249	O00193	O00193	Small acidic protein	SMAP	Color2 [DarkGray]	1	4					5	5	5	29	29	29	20.332	0	23.318	714890000	15	26.8963	26.7417	22.6657	27.097	26.4964	23.1979
	0.623271	-0.503326	O00203	O00203	AP-3 complex subunit beta-1	AP3B1	Color2 [DarkGray]	1	4					18	18	15	16.6	16.6	14	121.32	0	49.866	853750000	49	26.6206	27.2834	26.2677	27.2206	26.8702	27.5908
	0.0250587	-0.00512187	O00231	O00231	26S proteasome non-ATPase regulatory subunit 11	PSMD11	Color2 [DarkGray]	1	4					25	25	25	60.7	60.7	60.7	47.463	0	136.76	4660600000	149	29.4522	29.3308	29.2671	29.4341	29.3388	29.2927
	0.110367	0.0454171	O00232	O00232	26S proteasome non-ATPase regulatory subunit 12	PSMD12	Color2 [DarkGray]	1	4					18	18	18	42.8	42.8	42.8	52.904	0	92.401	1947200000	74	28.1588	28.066	28.1685	28.2197	27.7954	28.242
	0.413249	-0.876605	O00233	O00233	26S proteasome non-ATPase regulatory subunit 9	PSMD9	Color2 [DarkGray]	1	4					5	5	5	26	26	26	24.682	0	15.564	307520000	20	22.989	25.6244	25.6871	25.3608	25.6884	25.8812
	0.079836	0.0450071	O00244	O00244	Copper transport protein ATOX1	ATOX1	Color2 [DarkGray]	1	4					3	3	3	39.7	39.7	39.7	7.4016	0	49.422	711030000	25	26.8826	26.3417	26.7251	26.3704	26.714	26.73
	0.154068	-0.0691878	O00264	O00264	Membrane-associated progesterone receptor component 1	PGRMC1	Color2 [DarkGray]	1	4					8	8	8	41	41	41	21.671	0	23.3	748960000	42	26.7898	26.8186	26.3478	26.5809	26.7807	26.8022
	0.480383	-0.202975	O00267	O00267	Transcription elongation factor SPT5	SUPT5H	Color2 [DarkGray]	1	4					17	17	17	21.2	21.2	21.2	121	0	91.125	559260000	60	25.817	26.3214	26.3784	26.4602	26.3471	26.3184
	0.370406	-0.18833	O00273	O00273	DNA fragmentation factor subunit alpha	DFFA	Color2 [DarkGray]	1	4					4	4	4	15.4	15.4	15.4	36.521	0	22.073	266330000	18	24.8256	25.3332	25.0478	25.3726	25.4467	24.9522
	1.98368	0.358087	O00299	O00299	Chloride intracellular channel protein 1	CLIC1	Color2 [DarkGray]	1	4					15	15	15	79.7	79.7	79.7	26.922	0	188.2	7438900000	93	30.2037	30.0945	30.3121	29.8644	29.7556	29.916
	0.0301146	-0.0114428	O00303	O00303	Eukaryotic translation initiation factor 3 subunit F	EIF3F	Color2 [DarkGray]	1	4					12	12	12	47.1	47.1	47.1	37.563	0	97.819	2145800000	55	28.3195	28.202	28.1568	28.0574	28.1946	28.4606
	1.21057	0.145566	O00410;O60518	O00410	Importin-5	IPO5	Color2 [DarkGray]	1	4					42	42	42	54.9	54.9	54.9	123.63	0	323.31	7209500000	209	30.1105	30.1045	29.976	29.8964	29.9877	29.8702
	1.41818	0.353911	O00425	O00425	Insulin-like growth factor 2 mRNA-binding protein 3	IGF2BP3	Color2 [DarkGray]	1	4					19	17	17	41.3	37.3	37.3	63.704	0	136.69	1346500000	70	27.8922	27.5894	27.678	27.3997	27.4733	27.2249
	0.633902	0.113028	O00429	O00429	Dynamin-1-like protein	DNM1L	Color2 [DarkGray]	1	4					22	22	22	35.2	35.2	35.2	81.876	0	149.96	1771800000	111	28.111	27.8938	27.9891	27.8996	27.9635	27.7919
	0.330992	-0.110339	O00442	O00442	RNA 3-terminal phosphate cyclase	RTCA	Color2 [DarkGray]	1	4					4	4	4	11.7	11.7	11.7	39.336	0	8.0414	68690000	12	23.1235	23.3404	23.2139	23.5138	23.1024	23.3926
	0.0537601	0.0131111	O00469	O00469	Procollagen-lysine,2-oxoglutarate 5-dioxygenase 2	PLOD2	Color2 [DarkGray]	1	4					26	26	26	40.2	40.2	40.2	84.685	0	154	2972900000	120	28.6366	28.6929	28.8186	28.7366	28.794	28.5781
	0.633711	0.148106	O00487	O00487	26S proteasome non-ATPase regulatory subunit 14	PSMD14	Color2 [DarkGray]	1	4					11	11	11	58.7	58.7	58.7	34.577	0	67.605	1052500000	45	27.4053	27.3846	27.0804	27.1481	27.1521	27.1257
	0.29019	-0.747688	O00505	O00505	Importin subunit alpha-4	KPNA3	Color2 [DarkGray]	1	4					6	4	4	19.2	13.6	13.6	57.81	0	28.803	339650000	16	22.8759	25.9511	25.8798	25.1911	26.0113	25.7475
	1.41033	0.36781	O00560	O00560	Syntenin-1	SDCBP	Color2 [DarkGray]	1	4					7	7	7	41.3	41.3	41.3	32.444	0	67.786	630080000	36	26.6946	26.7748	26.3803	26.2746	26.2537	26.218
	0.494403	0.317158	O00567	O00567	Nucleolar protein 56	NOP56	Color2 [DarkGray]	1	4					6	6	6	11.6	11.6	11.6	66.049	0	15.452	72176000	16	23.9054	23.4046	23.5212	23.1364	23.756	22.9873
	0.962905	0.263084	O00571;O15523;Q9NQI0	O00571;O15523	ATP-dependent RNA helicase DDX3X;ATP-dependent RNA helicase DDX3Y	DDX3X;DDX3Y	Color2 [DarkGray]	1	4					36	36	35	63.4	63.4	61.8	73.243	0	232.81	6160300000	167	29.9671	29.8126	29.9276	29.8126	29.4108	29.6946
	1.11718	0.819752	O00592	O00592	Podocalyxin	PODXL	Color2 [DarkGray]	1	4					5	5	5	9.3	9.3	9.3	58.635	0	14.161	184000000	12	24.4486	25.3341	25.0972	23.8075	24.0535	24.5596
	0.344389	-0.0792777	O00625	O00625	Pirin	PIR	Color2 [DarkGray]	1	4					12	12	12	62.4	62.4	62.4	32.113	0	96.946	1598000000	50	27.9053	27.7964	27.5941	27.7959	27.8923	27.8454
	1.53876	0.372108	O00629	O00629	Importin subunit alpha-3	KPNA4	Color2 [DarkGray]	1	4					8	8	6	28.2	28.2	22.6	57.886	0	123.55	1218700000	38	27.6983	27.4377	27.6883	27.2401	27.3584	27.1095
	0.195149	-0.19004	O00743	O00743	Serine/threonine-protein phosphatase 6 catalytic subunit;Serine/threonine-protein phosphatase 6 catalytic subunit, N-terminally processed	PPP6C	Color2 [DarkGray]	1	4					7	7	7	26.6	26.6	26.6	35.144	0	21.428	210630000	22	25.2111	24.9464	24.0392	24.9631	24.7007	25.103
	0.996887	-0.15635	O00764	O00764	Pyridoxal kinase	PDXK	Color2 [DarkGray]	1	4					10	10	10	56.4	56.4	56.4	35.102	0	153.88	1515300000	44	27.5195	27.65	27.7651	27.7852	27.7787	27.8397
	0.803431	-0.520196	O14530	O14530	Thioredoxin domain-containing protein 9	TXNDC9	Color2 [DarkGray]	1	4					5	5	5	27	27	27	26.534	0	15.123	152850000	17	24.3158	23.5508	24.448	24.8146	24.4453	24.6153
	0.0354578	0.0307681	O14561	O14561	Acyl carrier protein, mitochondrial	NDUFAB1	Color2 [DarkGray]	1	4					3	3	3	21.2	21.2	21.2	17.417	0	8.0394	867630000	18	26.9821	27.0894	27.3055	27.3852	26.5394	27.36
	0.361711	0.093551	O14579	O14579	Coatomer subunit epsilon	COPE	Color2 [DarkGray]	1	4					11	11	11	54.5	54.5	54.5	34.482	0	61.332	1076700000	50	27.3727	27.2057	27.1796	27.1432	27.3212	27.013
	0.114229	0.0569547	O14672	O14672	Disintegrin and metalloproteinase domain-containing protein 10	ADAM10	Color2 [DarkGray]	1	4					8	8	8	15.2	15.2	15.2	84.141	0	39.1	400830000	35	25.65	25.9791	25.8426	26.0256	25.7818	25.4935
	0.198524	0.0598284	O14737	O14737	Programmed cell death protein 5	PDCD5	Color2 [DarkGray]	1	4					8	8	8	56.8	56.8	56.8	14.285	0	51.379	3245000000	48	28.9959	28.8063	28.6655	28.8271	28.8293	28.6318
	1.22136	-0.282688	O14744	O14744	Protein arginine N-methyltransferase 5;Protein arginine N-methyltransferase 5, N-terminally processed	PRMT5	Color2 [DarkGray]	1	4					19	19	19	36.1	36.1	36.1	72.683	0	54.442	1140300000	72	27.2163	27.0147	27.1304	27.4922	27.4975	27.2197
	0.965289	-0.159526	O14818;Q8TAA3	O14818	Proteasome subunit alpha type-7	PSMA7	Color2 [DarkGray]	1	4					15	15	15	64.1	64.1	64.1	27.887	0	162.16	4923200000	90	29.4691	29.2166	29.3213	29.5336	29.5037	29.4483
	1.13288	-0.168862	O14929	O14929	Histone acetyltransferase type B catalytic subunit	HAT1	Color2 [DarkGray]	1	4					11	11	11	36.3	36.3	36.3	49.512	0	86.118	902030000	41	26.9095	26.9352	26.7966	26.9778	27.159	27.0111
	0.344785	-0.109318	P19105;O14950;P24844	P19105;O14950;P24844	Myosin regulatory light chain 12A;Myosin regulatory light chain 12B;Myosin regulatory light polypeptide 9	MYL12A;MYL12B;MYL9	Color2 [DarkGray]	1	4					8	8	8	62.6	62.6	62.6	19.794	0	148.31	7953500000	59	30.2071	29.8704	30.1017	30.0351	30.329	30.1431
	0.19979	-0.0802517	O14964	O14964	Hepatocyte growth factor-regulated tyrosine kinase substrate	HGS	Color2 [DarkGray]	1	4					14	14	14	17.8	17.8	17.8	86.191	0	44.109	499120000	37	25.8167	26.192	26.2169	26.1486	26.3055	26.0124
	0.925681	-0.193293	O14980	O14980	Exportin-1	XPO1	Color2 [DarkGray]	1	4					40	40	40	45.9	45.9	45.9	123.38	0	323.31	5500900000	195	29.4956	29.4825	29.4342	29.5958	29.8532	29.5432
	0.512916	-0.129044	O15013	O15013	Rho guanine nucleotide exchange factor 10	ARHGEF10	Color2 [DarkGray]	1	4					9	9	9	9.9	9.9	9.9	151.61	0	22.296	179250000	26	24.6519	24.7811	24.4435	24.6829	24.8506	24.73
	0.289983	-0.0642738	O15067	O15067	Phosphoribosylformylglycinamidine synthase	PFAS	Color2 [DarkGray]	1	4					31	31	31	35.9	35.9	35.9	144.73	0	289.24	4781400000	162	29.2709	29.2426	29.4809	29.493	29.34	29.3541
	1.29053	0.371869	O15118	O15118	Niemann-Pick C1 protein	NPC1	Color2 [DarkGray]	1	4					8	8	8	7.9	7.9	7.9	142.17	0	66.865	304100000	31	25.4561	25.7347	25.725	25.1869	25.1486	25.4647
	0.393521	-0.0795892	O15143	O15143	Actin-related protein 2/3 complex subunit 1B	ARPC1B	Color2 [DarkGray]	1	4					14	14	13	52.7	52.7	46.5	40.949	0	148.73	2541600000	83	28.3154	28.4952	28.4559	28.5194	28.3802	28.6056
	0.777885	-0.321705	O15144	O15144	Actin-related protein 2/3 complex subunit 2	ARPC2	Color2 [DarkGray]	1	4					15	15	15	43	43	43	34.333	0	57.518	1522300000	62	27.2072	27.5425	27.7506	27.7625	28.0282	27.6748
	0.090695	0.0964781	O15145	O15145	Actin-related protein 2/3 complex subunit 3	ARPC3	Color2 [DarkGray]	1	4					5	5	5	29.8	29.8	29.8	20.546	0	25.271	636740000	22	26.7357	26.0124	26.8236	26.8132	25.887	26.582
	0.148622	-0.103326	O15173	O15173	Membrane-associated progesterone receptor component 2	PGRMC2	Color2 [DarkGray]	1	4					8	8	8	35.9	35.9	35.9	23.818	0	78.924	445380000	24	25.9571	25.8182	25.6514	25.5063	26.3477	25.8825
	0.195304	-0.0989799	O15212	O15212	Prefoldin subunit 6	PFDN6	Color2 [DarkGray]	1	4					4	4	4	24	24	24	14.582	0	18.561	571450000	25	26.1061	26.5567	26.083	26.1407	26.552	26.3501
	1.24658	1.23584	O15235	O15235	28S ribosomal protein S12, mitochondrial	MRPS12	Color2 [DarkGray]	1	4					4	4	4	34.1	34.1	34.1	15.173	0	10.482	123560000	16	24.6948	24.5274	24.5233	23.7598	23.8545	22.4235
	0.474247	1.67244	O15260	O15260	Surfeit locus protein 4	SURF4	Color2 [DarkGray]	1	4					4	4	4	14.9	14.9	14.9	30.394	0	16.405	801700000	15	27.3001	26.9094	26.9478	26.8499	26.9577	22.3323
	0.215875	-0.394184	O15269	O15269	Serine palmitoyltransferase 1	SPTLC1	Color2 [DarkGray]	1	4					7	7	7	15.4	15.4	15.4	52.743	0	16.333	218310000	22	24.9627	23.2316	25.4355	25.2524	24.4777	25.0823
	0.588408	-0.35423	O15305;Q92871	O15305	Phosphomannomutase 2	PMM2	Color2 [DarkGray]	1	4					7	7	7	28.9	28.9	28.9	28.082	0	24.428	583700000	32	25.5626	26.3521	26.3705	26.4259	26.5212	26.4008
	1.17153	0.516108	O15344;Q9UJV3	O15344	E3 ubiquitin-protein ligase Midline-1	MID1	Color2 [DarkGray]	1	4					10	10	10	18.1	18.1	18.1	75.25	0	31.029	219920000	32	24.8772	25.4159	25.3704	24.9261	24.6477	24.5413
	0.582612	0.222841	O15355	O15355	Protein phosphatase 1G	PPM1G	Color2 [DarkGray]	1	4					10	10	10	26.9	26.9	26.9	59.271	0	58.219	1489800000	56	27.7401	27.7758	27.8418	27.7671	27.2299	27.692
	0.899373	0.0721035	O15371	O15371	Eukaryotic translation initiation factor 3 subunit D	EIF3D	Color2 [DarkGray]	1	4					17	17	17	39.1	39.1	39.1	63.972	0	111.72	2244900000	64	28.3655	28.2594	28.3213	28.2211	28.2857	28.2231
	1.06485	0.281931	O15372	O15372	Eukaryotic translation initiation factor 3 subunit H	EIF3H	Color2 [DarkGray]	1	4					16	16	16	54.3	54.3	54.3	39.93	0	115.45	2103200000	73	28.3409	28.3237	28.4723	28.022	27.9459	28.3233
	1.72127	-0.515851	O15382	O15382	Branched-chain-amino-acid aminotransferase, mitochondrial	BCAT2	Color2 [DarkGray]	1	4					11	11	11	40.6	40.6	40.6	44.287	0	51.293	611930000	39	26.016	26.0031	26.185	26.7629	26.6384	26.3503
	0.389596	0.296049	O15460	O15460	Prolyl 4-hydroxylase subunit alpha-2	P4HA2	Color2 [DarkGray]	1	4					11	11	11	30.1	30.1	30.1	60.901	0	42.643	297540000	33	25.5174	25.6631	25.504	24.6419	25.4852	25.6693
	0.575366	-0.190189	O15498	O15498	Synaptobrevin homolog YKT6	YKT6	Color2 [DarkGray]	1	4					8	8	8	50.5	50.5	50.5	22.417	0	21.988	434250000	26	25.7619	25.7273	25.7693	25.6925	26.2002	25.9363
	0.27801	-0.0635955	O43143;Q14562	O43143	Pre-mRNA-splicing factor ATP-dependent RNA helicase DHX15	DHX15	Color2 [DarkGray]	1	4					30	30	29	43.9	43.9	42.8	90.932	0	155.75	2786800000	126	28.7389	28.5581	28.4937	28.7012	28.7293	28.551
	0.122438	-0.0772171	O43169	O43169	Cytochrome b5 type B	CYB5B	Color2 [DarkGray]	1	4					5	5	5	53.4	53.4	53.4	16.332	0	70.839	1906000000	41	27.6885	28.308	28.048	27.9068	28.3763	27.993
	0.175465	-0.0195433	O43242	O43242	26S proteasome non-ATPase regulatory subunit 3	PSMD3	Color2 [DarkGray]	1	4					23	23	23	41.6	41.6	41.6	60.977	0	196.47	3142900000	130	28.8121	28.7753	28.6725	28.7737	28.7832	28.7616
	0.399107	-0.808472	O43252	O43252	Bifunctional 3-phosphoadenosine 5-phosphosulfate synthase 1;Sulfate adenylyltransferase;Adenylyl-sulfate kinase	PAPSS1	Color2 [DarkGray]	1	4					8	7	7	16.2	13.9	13.9	70.832	0	20.643	229680000	20	25.3963	22.6612	24.9068	24.8474	25.1424	25.3999
	0.369644	-0.493395	O43291	O43291	Kunitz-type protease inhibitor 2	SPINT2	Color2 [DarkGray]	1	4					3	3	3	12.7	12.7	12.7	28.228	0	18.702	196070000	14	23.4026	25.1421	24.968	25.153	24.9229	24.917
	0.0918009	0.0473404	O43324	O43324	Eukaryotic translation elongation factor 1 epsilon-1	EEF1E1	Color2 [DarkGray]	1	4					6	6	6	33.3	33.3	33.3	19.81	0	19.527	789300000	21	26.9821	26.9156	26.4471	26.8461	26.7617	26.5949
	0.285972	-0.419587	O43390	O43390	Heterogeneous nuclear ribonucleoprotein R	HNRNPR	Color2 [DarkGray]	1	4					17	11	11	25.1	16.3	16.3	70.942	0	25.031	314580000	22	25.7634	23.9313	25.5459	25.4956	25.7252	25.2786
	0.377485	-0.155758	O43396	O43396	Thioredoxin-like protein 1	TXNL1	Color2 [DarkGray]	1	4					12	12	12	58.1	58.1	58.1	32.251	0	79.543	1094600000	39	26.8419	27.3329	27.3362	27.3622	27.3981	27.218
	0.80349	-0.362964	O43399	O43399	Tumor protein D54	TPD52L2	Color2 [DarkGray]	1	4					13	13	13	62.6	62.6	62.6	22.237	0	82.63	1194600000	50	26.7905	27.2328	27.4617	27.3877	27.6128	27.5734
	1.40008	-0.583614	O43491;Q9Y2J2	O43491	Band 4.1-like protein 2	EPB41L2	Color2 [DarkGray]	1	4					20	20	19	27.7	27.7	26.5	112.59	0	77.015	683520000	58	26.0908	26.3754	26.0002	26.7656	26.9986	26.4531
	0.890013	-0.18822	O43570	O43570	Carbonic anhydrase 12	CA12	Color2 [DarkGray]	1	4					9	9	9	37.3	37.3	37.3	39.45	0	115.39	1411100000	40	27.4323	27.6812	27.3583	27.6786	27.7017	27.6562
	0.908573	0.868377	O43583	O43583	Density-regulated protein	DENR	Color2 [DarkGray]	1	4					4	4	4	25.8	25.8	25.8	22.092	0	9.0328	138000000	8	24.6399	24.5285	24.8305	24.272	24.1974	22.9244
	0.552943	-0.313342	O43592	O43592	Exportin-T	XPOT	Color2 [DarkGray]	1	4					13	13	13	15.3	15.3	15.3	109.96	0	34.834	367030000	35	25.5884	25.2682	25.4397	25.4919	26.2114	25.5329
	0.497887	-0.31649	O43598	O43598	2-deoxynucleoside 5-phosphate N-hydrolase 1	DNPH1	Color2 [DarkGray]	1	4					6	6	6	37.9	37.9	37.9	19.108	0	16.223	230370000	20	24.3286	25.2098	24.8787	24.9417	25.3047	25.1203
	0.280193	0.649728	O43615	O43615	Mitochondrial import inner membrane translocase subunit TIM44	TIMM44	Color2 [DarkGray]	1	4					8	8	8	20.4	20.4	20.4	51.355	0	24.02	185990000	27	24.9702	24.8459	24.2329	24.7579	25.1071	22.2349
	0.279994	0.367273	O43633	O43633	Charged multivesicular body protein 2a	CHMP2A	Color2 [DarkGray]	1	4					6	6	6	27	27	27	25.104	0	15.352	197780000	17	24.9665	24.7475	25.1832	23.6813	24.6603	25.4537
	0.500209	0.965785	O43670	O43670	BUB3-interacting and GLEBS motif-containing protein ZNF207	ZNF207	Color2 [DarkGray]	1	4					5	5	5	13	13	13	50.75	0	18.509	189160000	13	24.5321	24.8392	25.1007	24.8322	24.5297	22.2128
	0.548835	-0.173127	O43681	O43681	ATPase ASNA1	ASNA1	Color2 [DarkGray]	1	4					9	9	9	35.3	35.3	35.3	38.792	0	25.952	437120000	35	25.9178	25.6906	25.7836	25.813	26.2129	25.8855
	0.00295318	-0.000942866	O43684	O43684	Mitotic checkpoint protein BUB3	BUB3	Color2 [DarkGray]	1	4					8	8	8	35.1	35.1	35.1	37.154	0	27.776	699160000	47	26.685	26.5853	26.5655	26.5776	26.7967	26.4643
	1.17504	-0.25989	O43707	O43707	Alpha-actinin-4	ACTN4	Color2 [DarkGray]	1	4					73	73	52	77.7	77.7	57.2	104.85	0	323.31	148920000000	819	34.3362	34.2045	34.035	34.3633	34.4345	34.5575
	2.82875	-0.273057	O43747	O43747	AP-1 complex subunit gamma-1	AP1G1	Color2 [DarkGray]	1	4					15	15	15	20.9	20.9	20.9	91.35	0	47.261	445830000	43	25.8144	25.8097	25.7644	26.0201	26.0601	26.1275
	0.333523	0.446859	O43760	O43760	Synaptogyrin-2	SYNGR2	Color2 [DarkGray]	1	4					5	5	5	20.5	20.5	20.5	24.81	0	12.746	196610000	22	24.3617	25.2156	25.2812	23.5901	25.1169	24.8108
	0.0810334	0.0180855	O43776	O43776	Asparagine--tRNA ligase, cytoplasmic	NARS	Color2 [DarkGray]	1	4					22	22	22	44.5	44.5	44.5	62.942	0	204.91	3266900000	110	28.8862	28.8207	28.7906	28.8636	28.91	28.6697
	0.135008	-0.042984	O43795	O43795	Unconventional myosin-Ib	MYO1B	Color2 [DarkGray]	1	4					40	40	37	40.4	40.4	37.1	131.98	0	246.07	3176500000	153	28.8567	28.748	28.7476	28.7468	29.0477	28.6868
	0.479316	-0.856679	O43813	O43813	LanC-like protein 1	LANCL1	Color2 [DarkGray]	1	4					7	7	7	23.1	23.1	23.1	45.283	0	42.941	188220000	19	24.7705	24.2253	22.401	24.9432	24.9651	24.0585
	0.193051	-0.177145	O43815	O43815	Striatin	STRN	Color2 [DarkGray]	1	4					7	7	6	13.2	13.2	12.3	86.131	0	27.785	210650000	24	25.2784	24.6079	24.2029	24.6223	25.1697	24.8287
	0.407038	-0.149789	O43837	O43837	Isocitrate dehydrogenase [NAD] subunit beta, mitochondrial	IDH3B	Color2 [DarkGray]	1	4					10	10	10	28.6	28.6	28.6	42.183	0	28.328	574990000	46	25.9515	26.3918	26.2958	26.2639	26.3019	26.5227
	0.185939	0.0710843	O43847	O43847	Nardilysin	NRD1	Color2 [DarkGray]	1	4					17	17	17	15.9	15.9	15.9	131.57	0	48.257	548210000	59	26.5399	26.2362	26.0438	26.1711	26.193	26.2427
	0.223482	0.0506477	O43865;Q96HN2	O43865;Q96HN2	Putative adenosylhomocysteinase 2;Putative adenosylhomocysteinase 3	AHCYL1;AHCYL2	Color2 [DarkGray]	1	4					8	8	8	18.9	18.9	18.9	58.951	0	33.952	304620000	26	25.371	25.5601	25.4219	25.3324	25.3321	25.5366
	0.245465	-0.0566483	O60218	O60218	Aldo-keto reductase family 1 member B10	AKR1B10	Color2 [DarkGray]	1	4					29	29	18	83.2	83.2	50.6	36.019	0	323.31	208530000000	394	34.9423	34.7076	34.6799	34.9	34.8289	34.7709
	0.20277	-0.0272096	O60256	O60256	Phosphoribosyl pyrophosphate synthase-associated protein 2	PRPSAP2	Color2 [DarkGray]	1	4					10	10	8	35.2	35.2	29.5	40.925	0	47.742	859270000	51	26.8283	26.8551	26.9424	26.9713	26.8375	26.8986
	0.981294	0.222161	O60271;Q9UPT6	O60271	C-Jun-amino-terminal kinase-interacting protein 4	SPAG9	Color2 [DarkGray]	1	4					24	24	24	24.3	24.3	24.3	146.2	0	124.79	1283400000	85	27.6659	27.4579	27.6901	27.4963	27.2374	27.4136
	0.807361	-0.637505	O60313	O60313	Dynamin-like 120 kDa protein, mitochondrial;Dynamin-like 120 kDa protein, form S1	OPA1	Color2 [DarkGray]	1	4					10	10	10	13.4	13.4	13.4	111.63	0	24.157	160950000	26	24.079	24.3763	23.7423	24.0807	25.1081	24.9213
	1.01007	-0.561885	O60443	O60443	Non-syndromic hearing impairment protein 5	DFNA5	Color2 [DarkGray]	1	4					10	10	10	27.8	27.8	27.8	54.554	0	34.585	218030000	28	24.4166	24.6407	24.2729	25.0712	25.3807	24.5639
	0.621226	-0.584667	O60488	O60488	Long-chain-fatty-acid--CoA ligase 4	ACSL4	Color2 [DarkGray]	1	4					10	8	8	19.5	15.5	15.5	79.187	0	15.385	95993000	15	23.3399	24.0352	22.7091	24.1867	24.0575	23.5939
	0.151761	-0.423035	O60502	O60502	Protein O-GlcNAcase	MGEA5	Color2 [DarkGray]	1	4					8	8	8	10.8	10.8	10.8	102.91	0	30.225	219540000	23	25.3598	22.7315	25.1995	25.4301	25.474	23.656
	0.423667	0.0817051	O60506	O60506	Heterogeneous nuclear ribonucleoprotein Q	SYNCRIP	Color2 [DarkGray]	1	4					25	25	19	44.8	44.8	35.8	69.602	0	203.37	5159900000	130	29.6688	29.4942	29.4296	29.3833	29.524	29.4403
	1.18999	-0.361165	O60610	O60610	Protein diaphanous homolog 1	DIAPH1	Color2 [DarkGray]	1	4					14	14	14	11.6	11.6	11.6	141.35	0	37.571	365430000	42	25.5424	25.1583	25.5778	25.8564	25.8108	25.6948
	1.46671	0.240358	O60664	O60664	Perilipin-3	PLIN3	Color2 [DarkGray]	1	4					17	17	17	57.6	57.6	57.6	47.074	0	183.77	3714800000	88	29.1739	29.2566	29.046	28.9851	28.9378	28.8326
	1.38735	0.629571	O60678	O60678	Protein arginine N-methyltransferase 3	PRMT3	Color2 [DarkGray]	1	4					9	9	9	19.8	19.8	19.8	59.875	0	31.88	240850000	33	25.5863	25.5899	25.0582	24.5845	24.9883	24.773
	0.456427	-0.220956	O60684;O15131	O60684;O15131	Importin subunit alpha-7;Importin subunit alpha-6	KPNA6;KPNA5	Color2 [DarkGray]	1	4					10	10	3	21.6	21.6	8	60.029	0	53.163	389600000	36	25.804	25.7552	25.3089	25.6093	26.084	25.8376
	1.06951	-0.247298	O60701	O60701	UDP-glucose 6-dehydrogenase	UGDH	Color2 [DarkGray]	1	4					35	35	35	69.8	69.8	69.8	55.023	0	323.31	39092000000	273	32.4344	32.2617	32.0733	32.4756	32.565	32.4707
	0.0882163	0.032889	O60716	O60716	Catenin delta-1	CTNND1	Color2 [DarkGray]	1	4					25	25	25	34	34	34	108.17	0	119.69	1488300000	87	27.8933	27.4866	27.7185	27.7269	27.7276	27.5452
	0.260706	-0.15182	O60749	O60749	Sorting nexin-2	SNX2	Color2 [DarkGray]	1	4					14	12	12	30.8	26.8	26.8	58.47	0	49.56	317440000	37	25.148	25.7477	25.1944	25.2599	25.6059	25.6797
	0.0521547	0.0323499	O60763;REV__Q5VZ89	O60763	General vesicular transport factor p115	USO1	Color2 [DarkGray]	1	4					23	23	23	31	31	31	107.89	0	66.763	984630000	77	27.1168	26.9322	27.2235	27.3161	26.6745	27.185
	0.215406	-0.671053	Q99880;Q99879;Q99877;Q93079;Q5QNW6;P62807;P58876;P57053;O60814;Q16778;P33778;P23527;P06899;Q8N257;Q96A08	Q99880;Q99879;Q99877;Q93079;Q5QNW6;P62807;P58876;P57053;O60814;Q16778;P33778;P23527;P06899	Histone H2B type 1-L;Histone H2B type 1-M;Histone H2B type 1-N;Histone H2B type 1-H;Histone H2B type 2-F;Histone H2B type 1-C/E/F/G/I;Histone H2B type 1-D;Histone H2B type F-S;Histone H2B type 1-K;Histone H2B type 2-E;Histone H2B type 1-B;Histone H2B type 1-O;Histone H2B type 1-J	HIST1H2BL;HIST1H2BM;HIST1H2BN;HIST1H2BH;HIST2H2BF;HIST1H2BC;HIST1H2BD;H2BFS;HIST1H2BK;HIST2H2BE;HIST1H2BB;HIST1H2BO;HIST1H2BJ	Color2 [DarkGray]	1	4					5	5	5	32.5	32.5	32.5	13.952	0	30.344	597360000	13	25.7278	25.7715	23.3154	26.3414	23.8217	26.6648
	0.353664	0.114899	O60826	O60826	Coiled-coil domain-containing protein 22	CCDC22	Color2 [DarkGray]	1	4					5	5	5	11.3	11.3	11.3	70.755	0	14.718	101540000	19	23.9853	24.0124	23.7131	23.7623	23.9657	23.6381
	1.12804	0.424993	O60841	O60841	Eukaryotic translation initiation factor 5B	EIF5B	Color2 [DarkGray]	1	4					25	25	25	27	27	27	138.83	0	123.85	1481400000	81	28.1904	27.8362	27.7092	27.6049	27.5747	27.2812
	0.534451	-0.252508	O60869	O60869	Endothelial differentiation-related factor 1	EDF1	Color2 [DarkGray]	1	4					5	5	5	37.2	37.2	37.2	16.368	0	19.65	471510000	20	25.8852	25.6339	26.2227	26.3234	25.9318	26.2441
	0.0699645	-0.0201925	O60884	O60884	DnaJ homolog subfamily A member 2	DNAJA2	Color2 [DarkGray]	1	4					16	16	16	45.9	45.9	45.9	45.745	0	68.867	1397300000	71	27.689	27.4637	27.7165	27.7655	27.5706	27.5938
	0.287049	0.245272	O60925	O60925	Prefoldin subunit 1	PFDN1	Color2 [DarkGray]	1	4					8	8	8	54.9	54.9	54.9	14.21	0	66.552	402710000	24	25.6466	26.1036	26.028	26.2809	25.2166	25.5449
	0.217695	-0.0963872	O75116	O75116	Rho-associated protein kinase 2	ROCK2	Color2 [DarkGray]	1	4					31	31	26	23.6	23.6	20.2	160.9	0	110.34	1019100000	113	26.9316	27.0246	27.2844	27.3502	26.908	27.2716
	0.743841	-0.3005	O75131;Q96FN4;Q8IYJ1;Q96A23;O95741;Q86YQ8;Q9HCH3;Q9UBL6	O75131	Copine-3	CPNE3	Color2 [DarkGray]	1	4					12	12	12	28.5	28.5	28.5	60.13	0	54.321	1178500000	58	27.3297	27.0123	27.2242	27.7356	27.1887	27.5434
	0.56258	0.101489	O75153;Q9Y5I4	O75153	Clustered mitochondria protein homolog	CLUH	Color2 [DarkGray]	1	4					21	21	21	19.9	19.9	19.9	146.67	0	62.884	707920000	63	26.7116	26.7081	26.6079	26.7193	26.4979	26.5059
	0.311095	0.179084	O75223	O75223	Gamma-glutamylcyclotransferase	GGCT	Color2 [DarkGray]	1	4					7	7	7	43.1	43.1	43.1	21.007	0	24.992	465970000	31	26.1017	26.3164	25.9155	26.0316	25.5388	26.226
	0.174893	-0.21904	O75306	O75306	NADH dehydrogenase [ubiquinone] iron-sulfur protein 2, mitochondrial	NDUFS2	Color2 [DarkGray]	1	4					5	5	5	12.5	12.5	12.5	52.545	0	10.556	161570000	17	23.4796	24.9578	24.4952	24.2362	24.876	24.4775
	0.267842	0.145164	O75312	O75312	Zinc finger protein ZPR1	ZPR1	Color2 [DarkGray]	1	4					9	9	9	23.7	23.7	23.7	50.925	0	21.544	146100000	22	24.6565	24.2167	24.3019	24.5577	23.973	24.209
	1.03955	-0.243036	O75347	O75347	Tubulin-specific chaperone A	TBCA	Color2 [DarkGray]	1	4					13	13	13	61.1	61.1	61.1	12.855	0	55.291	2875400000	77	28.4543	28.4103	28.6567	28.9067	28.6495	28.6942
	0.353407	0.129384	O75348;O95670	O75348	V-type proton ATPase subunit G 1	ATP6V1G1	Color2 [DarkGray]	1	4					4	4	4	41.5	41.5	41.5	13.757	0	48.837	489430000	17	26.4578	25.9764	26.0976	26.1229	26.0611	25.9597
	0.629611	-0.173232	O75351;Q6PIW4	O75351	Vacuolar protein sorting-associated protein 4B	VPS4B	Color2 [DarkGray]	1	4					7	6	6	21.2	18.5	18.5	49.301	0	33.985	264530000	17	24.9911	25.1573	25.2106	25.3792	25.4152	25.0843
	0.843565	0.280532	O75368	O75368	SH3 domain-binding glutamic acid-rich-like protein	SH3BGRL	Color2 [DarkGray]	1	4					7	7	7	84.2	84.2	84.2	12.774	0	60.648	523010000	26	26.4849	25.9987	26.3495	25.9554	26.103	25.933
	1.8153	-0.196571	O75369	O75369	Filamin-B	FLNB	Color2 [DarkGray]	1	4					146	146	132	70.5	70.5	67.8	278.16	0	323.31	68227000000	1029	33.0798	33.0709	33.1692	33.2443	33.3709	33.2945
	0.699196	-0.09003	O75390	O75390	Citrate synthase, mitochondrial	CS	Color2 [DarkGray]	1	4					16	16	16	47.4	47.4	47.4	51.712	0	323.31	4412700000	78	29.2416	29.1521	29.2411	29.2614	29.4022	29.2413
	0.483358	-0.182248	O75396	O75396	Vesicle-trafficking protein SEC22b	SEC22B	Color2 [DarkGray]	1	4					6	6	6	32.6	32.6	32.6	24.593	0	26.003	455600000	19	25.9853	25.7213	25.654	25.8409	25.8393	26.2272
	0.43022	-0.253969	O75436	O75436	Vacuolar protein sorting-associated protein 26A	VPS26A	Color2 [DarkGray]	1	4					8	8	8	32.4	32.4	32.4	38.169	0	34.485	646830000	38	26.0159	26.6745	26.2728	26.2468	26.7537	26.7247
	0.32333	-0.158013	O75439	O75439	Mitochondrial-processing peptidase subunit beta	PMPCB	Color2 [DarkGray]	1	4					9	8	8	21.9	20.4	20.4	54.366	0	31.166	222400000	30	24.6853	24.9386	24.7964	25.2214	25.0714	24.6014
	0.311037	0.122188	O75477	O75477	Erlin-1	ERLIN1	Color2 [DarkGray]	1	4					8	8	5	26.9	26.9	17.9	38.925	0	35.994	485040000	30	26.3489	26.0157	26.0745	26.0792	26.2047	25.7887
	0.326385	-0.427552	O75489	O75489	NADH dehydrogenase [ubiquinone] iron-sulfur protein 3, mitochondrial	NDUFS3	Color2 [DarkGray]	1	4					4	4	4	18.9	18.9	18.9	30.241	0	9.5097	107960000	12	22.5778	24.2116	24.0649	23.9465	24.3084	23.8821
	1.45604	0.562672	O75521	O75521	Enoyl-CoA delta isomerase 2, mitochondrial	ECI2	Color2 [DarkGray]	1	4					5	5	5	16.8	16.8	16.8	43.585	0	19.142	176030000	20	25.158	24.8193	24.7013	24.513	24.3627	24.115
	0.0860397	-0.0327447	O75607	O75607	Nucleoplasmin-3	NPM3	Color2 [DarkGray]	1	4					2	2	2	20.2	20.2	20.2	19.343	0	51.335	592170000	15	26.3594	26.5023	26.181	26.3678	26.5559	26.2173
	0.244202	-0.0913601	O75608	O75608	Acyl-protein thioesterase 1	LYPLA1	Color2 [DarkGray]	1	4					7	7	7	43.9	43.9	43.9	24.669	0	141.84	870970000	25	27.0083	26.8686	26.8697	26.9959	26.7695	27.2552
	0.0419925	-0.0192178	O75643	O75643	U5 small nuclear ribonucleoprotein 200 kDa helicase	SNRNP200	Color2 [DarkGray]	1	4					49	49	49	28.1	28.1	28.1	244.5	0	272.35	2506100000	168	28.534	28.393	28.2947	28.3958	28.682	28.2015
	0.199667	0.0701135	O75663	O75663	TIP41-like protein	TIPRL	Color2 [DarkGray]	1	4					7	7	7	37.1	37.1	37.1	31.444	0	18.56	272850000	23	25.4974	25.2911	25.1373	25.3567	25.0712	25.2876
	0.4693	-0.560116	O75688	O75688	Protein phosphatase 1B	PPM1B	Color2 [DarkGray]	1	4					5	5	3	14.8	14.8	10.2	52.642	0	37.74	138210000	12	23.1652	24.9468	24.0955	24.5433	24.632	24.7126
	0.250228	-0.135694	O75694	O75694	Nuclear pore complex protein Nup155	NUP155	Color2 [DarkGray]	1	4					13	13	13	13.5	13.5	13.5	155.2	0	35.358	162180000	30	24.2902	24.3122	24.3674	24.6725	24.6728	24.0316
	3.25104	-0.191711	O75821	O75821	Eukaryotic translation initiation factor 3 subunit G	EIF3G	Color2 [DarkGray]	1	4					11	11	11	37.8	37.8	37.8	35.611	0	66.871	755320000	37	26.6428	26.6103	26.6651	26.8466	26.8105	26.8362
	0.00344701	0.000881831	O75822	O75822	Eukaryotic translation initiation factor 3 subunit J	EIF3J	Color2 [DarkGray]	1	4					10	10	10	32.9	32.9	32.9	29.062	0	44.47	695690000	39	26.7295	26.4556	26.6089	26.5436	26.6245	26.6232
	1.38537	-0.885548	O75832	O75832	26S proteasome non-ATPase regulatory subunit 10	PSMD10	Color2 [DarkGray]	1	4					6	6	6	30.1	30.1	30.1	24.428	0	11.49	156600000	20	23.417	24.0289	24.2869	24.503	24.8922	24.9944
	0.00116842	-0.000415802	O75874	O75874	Isocitrate dehydrogenase [NADP] cytoplasmic	IDH1	Color2 [DarkGray]	1	4					24	24	23	67.9	67.9	65.7	46.659	0	195.25	8849300000	133	30.4934	30.1331	30.2037	30.2296	30.3485	30.2534
	0.0963299	-0.0879091	O75880	O75880	Protein SCO1 homolog, mitochondrial	SCO1	Color2 [DarkGray]	1	4					4	4	4	12.3	12.3	12.3	33.814	0	9.9686	142070000	17	23.9793	23.9934	24.7247	24.6091	23.9011	24.4509
	0.266561	-0.183242	O75884	O75884	Putative hydrolase RBBP9	RBBP9	Color2 [DarkGray]	1	4					6	6	6	53.2	53.2	53.2	21	0	21.029	306060000	28	25.6304	24.7964	25.4695	25.4108	25.3537	25.6815
	0.110186	0.0696729	O75915	O75915	PRA1 family protein 3	ARL6IP5	Color2 [DarkGray]	1	4					5	5	5	25	25	25	21.614	0	58.731	578410000	15	26.3204	26.1341	26.7552	26.4086	26.0697	26.5224
	0.202099	-0.172946	O75947	O75947	ATP synthase subunit d, mitochondrial	ATP5H	Color2 [DarkGray]	1	4					7	7	7	45.3	45.3	45.3	18.491	0	24.782	627920000	27	25.6865	26.5859	26.7299	26.5978	26.4331	26.4903
	0.38292	-0.503251	O75955	O75955	Flotillin-1	FLOT1	Color2 [DarkGray]	1	4					7	7	7	21.5	21.5	21.5	47.355	0	21.283	162650000	15	24.6938	23.1585	24.8344	24.4831	24.7806	24.9327
	0.599775	0.232924	O75964	O75964	ATP synthase subunit g, mitochondrial	ATP5L	Color2 [DarkGray]	1	4					4	4	4	46.6	46.6	46.6	11.428	0	13.641	297620000	21	25.4495	25.6762	25.3104	24.9721	25.3631	25.4022
	0.134691	0.0273393	O76003	O76003	Glutaredoxin-3	GLRX3	Color2 [DarkGray]	1	4					18	18	18	57.9	57.9	57.9	37.432	0	179.9	3909900000	108	29.1228	29.0687	29.1306	29.1838	28.9411	29.1152
	0.110065	-0.0153484	O76094	O76094	Signal recognition particle subunit SRP72	SRP72	Color2 [DarkGray]	1	4					15	15	15	25	25	25	74.605	0	52.11	882050000	68	26.889	26.9061	27.0178	26.989	26.8928	26.977
	0.548981	-1.20346	O94903	O94903	Proline synthase co-transcribed bacterial homolog protein	PROSC	Color2 [DarkGray]	1	4					6	6	6	24	24	24	30.344	0	20.022	323110000	19	25.2978	25.3149	22.4371	25.5933	25.811	25.2559
	0.621782	0.124421	O94906	O94906	Pre-mRNA-processing factor 6	PRPF6	Color2 [DarkGray]	1	4					12	12	12	15	15	15	106.92	0	25.413	163120000	30	24.6585	24.5902	24.3797	24.3614	24.4198	24.4739
	0.147815	0.0402508	O94925	O94925	Glutaminase kidney isoform, mitochondrial	GLS	Color2 [DarkGray]	1	4					18	18	18	34.1	34.1	34.1	73.46	0	122.2	2690800000	98	28.6761	28.5468	28.4629	28.5192	28.6618	28.3841
	0.101382	0.0516294	O94973	O94973	AP-2 complex subunit alpha-2	AP2A2	Color2 [DarkGray]	1	4					20	13	13	27.2	18.5	18.5	103.96	0	71.256	364190000	30	25.4826	25.8363	25.6782	25.3346	25.8561	25.6516
	0.00106073	0.000535329	O94979	O94979	Protein transport protein Sec31A	SEC31A	Color2 [DarkGray]	1	4					19	19	19	19.4	19.4	19.4	133.01	0	57.615	700950000	59	26.6674	26.4677	26.4906	26.6143	26.7605	26.2493
	0.695664	-0.441203	O94992;Q96MH2	O94992	Protein HEXIM1	HEXIM1	Color2 [DarkGray]	1	4					8	8	8	24.2	24.2	24.2	40.623	0	34.878	354940000	28	25.4568	25.452	24.9849	25.6325	26.2029	25.3819
	0.847197	0.3486	O95163	O95163	Elongator complex protein 1	IKBKAP	Color2 [DarkGray]	1	4					16	16	16	16.8	16.8	16.8	150.25	0	35.301	243340000	31	25.2475	25.4229	25.1582	24.747	24.7591	25.2767
	0.479197	0.23223	O95202	O95202	LETM1 and EF-hand domain-containing protein 1, mitochondrial	LETM1	Color2 [DarkGray]	1	4					10	10	10	18.3	18.3	18.3	83.353	0	48.761	454720000	28	25.7336	26.341	25.9648	25.6666	26.0086	25.6676
	0.0955049	0.098182	O95218	O95218	Zinc finger Ran-binding domain-containing protein 2	ZRANB2	Color2 [DarkGray]	1	4					4	4	4	12.1	12.1	12.1	37.404	0	8.8559	89662000	15	23.4958	23.3214	24.0625	23.9302	22.9613	23.6937
	0.388672	-0.227333	O95219	O95219	Sorting nexin-4	SNX4	Color2 [DarkGray]	1	4					2	2	2	5.3	5.3	5.3	51.908	0	8.8356	131340000	12	24.2277	24.0122	23.8047	24.4083	24.501	23.8172
	1.04094	-0.720354	O95249	O95249	Golgi SNAP receptor complex member 1	GOSR1	Color2 [DarkGray]	1	4					4	4	4	17.2	17.2	17.2	28.612	0	12.538	147700000	15	23.5725	24.6248	23.7603	24.7095	24.7487	24.6605
	0.316524	0.191423	O95292	O95292	Vesicle-associated membrane protein-associated protein B/C	VAPB	Color2 [DarkGray]	1	4					8	7	7	41.2	41.2	41.2	27.228	0	22.126	390090000	37	25.4626	25.8919	26.2305	25.8702	25.4945	25.6459
	0.328602	-0.406336	O95302;Q75LS8	O95302	Peptidyl-prolyl cis-trans isomerase FKBP9	FKBP9	Color2 [DarkGray]	1	4					7	6	6	11.8	11.8	11.8	63.083	0	12.841	152350000	20	24.5839	24.4908	23.023	24.4313	24.3427	24.5428
	0.391008	0.173913	O95336	O95336	6-phosphogluconolactonase	PGLS	Color2 [DarkGray]	1	4					10	10	10	55	55	55	27.547	0	38.865	618770000	42	26.5314	26.7163	26.1105	26.2237	26.3897	26.2231
	0.148978	0.0315762	O95340	O95340	Bifunctional 3-phosphoadenosine 5-phosphosulfate synthase 2;Sulfate adenylyltransferase;Adenylyl-sulfate kinase	PAPSS2	Color2 [DarkGray]	1	4					14	14	13	29	29	26.7	69.5	0	32.475	345960000	39	25.4751	25.6433	25.656	25.6368	25.5851	25.4577
	1.74141	-0.31159	O95347	O95347	Structural maintenance of chromosomes protein 2	SMC2	Color2 [DarkGray]	1	4					23	23	23	24.5	24.5	24.5	135.65	0	75.928	547820000	48	25.9414	26.0492	26.2052	26.3391	26.366	26.4255
	0.678484	0.194664	O95361;Q309B1	O95361	Tripartite motif-containing protein 16	TRIM16	Color2 [DarkGray]	1	4					26	26	26	53.5	53.5	53.5	63.954	0	233.26	3590700000	134	29.1903	28.8216	29.2239	28.9225	28.8712	28.8582
	0.135018	0.0371119	O95373	O95373	Importin-7	IPO7	Color2 [DarkGray]	1	4					26	26	25	32.8	32.8	31.8	119.52	0	276.54	4606900000	141	29.5149	29.248	29.2288	29.3207	29.3483	29.2114
	0.120562	-0.0446027	O95433	O95433	Activator of 90 kDa heat shock protein ATPase homolog 1	AHSA1	Color2 [DarkGray]	1	4					18	18	18	66.9	66.9	66.9	38.274	0	156.02	5533800000	87	29.8698	29.5278	29.4282	29.6832	29.6554	29.6211
	0.36365	0.133387	O95456	O95456	Proteasome assembly chaperone 1	PSMG1	Color2 [DarkGray]	1	4					2	2	2	9	9	9	32.854	0	11.744	289690000	12	25.6558	25.3794	25.1669	25.2764	25.3638	25.1617
	0.379024	0.175906	O95470	O95470	Sphingosine-1-phosphate lyase 1	SGPL1	Color2 [DarkGray]	1	4					13	13	13	28.2	28.2	28.2	63.523	0	31.923	212630000	34	24.8067	24.8105	25.2493	24.955	24.5302	24.8536
	0.370395	0.0750802	O95573	O95573	Long-chain-fatty-acid--CoA ligase 3	ACSL3	Color2 [DarkGray]	1	4					26	26	24	53.1	53.1	49	80.419	0	168.87	2253500000	113	28.4231	28.3131	28.2265	28.1639	28.3695	28.2041
	0.45142	-0.386988	O95757	O95757	Heat shock 70 kDa protein 4L	HSPA4L	Color2 [DarkGray]	1	4					21	17	17	33.6	28.1	28.1	94.511	0	74.117	546550000	47	26.454	26.1746	25.3324	26.1506	26.6603	26.311
	0.319985	0.57488	O95758	O95758	Polypyrimidine tract-binding protein 3	PTBP3	Color2 [DarkGray]	1	4					5	4	4	13.2	11.8	11.8	59.689	0	48.191	232830000	18	25.5098	25.1169	25.4453	25.7814	23.3696	25.1963
	1.14672	0.28005	O95782	O95782	AP-2 complex subunit alpha-1	AP2A1	Color2 [DarkGray]	1	4					28	28	21	34.4	34.4	27	107.54	0	138.8	1606800000	88	27.8754	27.9027	28.109	27.8567	27.5738	27.6165
	0.899275	-0.268154	O95793	O95793	Double-stranded RNA-binding protein Staufen homolog 1	STAU1	Color2 [DarkGray]	1	4					7	7	6	12.8	12.8	11.4	63.182	0	26.892	243330000	24	24.8224	25.0833	24.6934	25.0535	25.2919	25.0581
	0.383142	-0.155183	O95810	O95810	Serum deprivation-response protein	SDPR	Color2 [DarkGray]	1	4					6	6	6	19.1	19.1	19.1	47.173	0	28.495	169620000	20	24.251	24.516	24.5746	24.3903	24.5548	24.8621
	0.365438	-0.224501	O95816	O95816	BAG family molecular chaperone regulator 2	BAG2	Color2 [DarkGray]	1	4					7	7	7	41.7	41.7	41.7	23.772	0	70.842	554640000	36	25.632	26.4184	26.2935	26.423	26.4143	26.1801
	0.37771	-0.173739	O95817	O95817	BAG family molecular chaperone regulator 3	BAG3	Color2 [DarkGray]	1	4					14	14	14	37.4	37.4	37.4	61.594	0	43.705	646430000	44	26.6901	26.108	26.4002	26.6422	26.6922	26.3851
	0.424893	0.111186	O95831	O95831	Apoptosis-inducing factor 1, mitochondrial	AIFM1	Color2 [DarkGray]	1	4					17	17	17	35.6	35.6	35.6	66.9	0	102.34	1374600000	65	27.7842	27.6012	27.4758	27.3809	27.5413	27.6055
	0.11009	-0.294781	O95861	O95861	3(2),5-bisphosphate nucleotidase 1	BPNT1	Color2 [DarkGray]	1	4					7	7	7	29.5	29.5	29.5	33.392	0	16.87	197210000	15	22.6237	25.2228	25.2865	24.9759	23.8588	25.1826
	0.291487	-0.108116	O95881	O95881	Thioredoxin domain-containing protein 12	TXNDC12	Color2 [DarkGray]	1	4					6	6	6	40.1	40.1	40.1	19.206	0	29.394	604150000	39	26.339	26.5068	26.0824	26.4519	26.5452	26.2555
	0.87861	-0.324745	O96005	O96005	Cleft lip and palate transmembrane protein 1	CLPTM1	Color2 [DarkGray]	1	4					6	6	6	8.8	8.8	8.8	76.096	0	15.055	185460000	20	24.631	24.1752	24.1451	24.5968	24.7794	24.5493
	0.962916	-0.491535	P00167	P00167	Cytochrome b5	CYB5A	Color2 [DarkGray]	1	4					5	5	5	49.3	49.3	49.3	15.33	0	22.39	767220000	32	26.0096	26.6036	26.6947	26.8856	27.1264	26.7704
	1.58716	0.158475	P00338;Q6ZMR3;P07864	P00338	L-lactate dehydrogenase A chain	LDHA	Color2 [DarkGray]	1	4					26	26	25	73.8	73.8	70.2	36.688	0	323.31	102560000000	244	33.9517	33.8501	33.8956	33.7771	33.6703	33.7745
	1.2089	-0.185975	P00352	P00352	Retinal dehydrogenase 1	ALDH1A1	Color2 [DarkGray]	1	4					41	41	38	86.8	86.8	83.6	54.861	0	323.31	251510000000	655	35.0909	34.8712	34.8812	35.1219	35.1531	35.1262
	0.115454	-0.0502593	P00367;P49448	P00367;P49448	Glutamate dehydrogenase 1, mitochondrial;Glutamate dehydrogenase 2, mitochondrial	GLUD1;GLUD2	Color2 [DarkGray]	1	4					23	23	23	53.2	53.2	53.2	61.397	0	125.18	3198200000	121	29.0332	28.8046	28.5152	28.7613	28.8111	28.9315
	0.0846837	-0.0318095	P00387	P00387	NADH-cytochrome b5 reductase 3;NADH-cytochrome b5 reductase 3 membrane-bound form;NADH-cytochrome b5 reductase 3 soluble form	CYB5R3	Color2 [DarkGray]	1	4					10	10	10	57.1	57.1	57.1	34.234	0	80.612	512370000	39	26.365	26.0898	26.1585	26.0734	26.4305	26.2048
	1.53611	-0.200495	P00390	P00390	Glutathione reductase, mitochondrial	GSR	Color2 [DarkGray]	1	4					22	22	22	60.9	60.9	60.9	56.256	0	323.31	6669600000	137	29.7933	29.7531	29.6771	29.9015	29.8831	30.0404
	1.06898	0.371839	P00403	P00403	Cytochrome c oxidase subunit 2	MT-CO2	Color2 [DarkGray]	1	4					4	4	4	20.7	20.7	20.7	25.565	0	40.246	1139900000	21	27.4971	27.5053	27.4445	26.9657	27.4346	26.9311
	0.6756	0.137774	P00491	P00491	Purine nucleoside phosphorylase	PNP	Color2 [DarkGray]	1	4					14	14	14	62.6	62.6	62.6	32.118	0	198.52	4098600000	94	29.4124	29.0961	29.2238	29.0869	29.1049	29.1271
	1.40749	-0.255167	P00492	P00492	Hypoxanthine-guanine phosphoribosyltransferase	HPRT1	Color2 [DarkGray]	1	4					13	13	12	79.4	79.4	76.1	24.579	0	160.45	4231400000	79	29.1453	28.9431	29.0293	29.3095	29.3914	29.1823
	1.30436	0.311993	P00505	P00505	Aspartate aminotransferase, mitochondrial	GOT2	Color2 [DarkGray]	1	4					28	28	28	73.3	73.3	73.3	47.517	0	272.33	6656100000	134	29.8806	30.1054	30.124	29.5642	29.8104	29.7994
	0.553273	-0.114283	P00533;P04626;Q15303	P00533	Epidermal growth factor receptor	EGFR	Color2 [DarkGray]	1	4					18	18	18	18.1	18.1	18.1	134.28	0	75.889	1163200000	67	27.1661	27.3639	27.2995	27.4661	27.4565	27.2498
	0.561103	0.0848007	P00558;P07205	P00558	Phosphoglycerate kinase 1	PGK1	Color2 [DarkGray]	1	4					35	35	35	81.5	81.5	81.5	44.614	0	323.31	40802000000	282	32.5658	32.3942	32.6048	32.4383	32.4054	32.4667
	0.275557	-0.0859127	P00568;Q9Y6K8	P00568	Adenylate kinase isoenzyme 1	AK1	Color2 [DarkGray]	1	4					8	8	8	51	51	51	21.635	0	56.895	585510000	29	26.4562	26.1138	26.191	26.4665	26.2244	26.3279
	0.968737	0.242351	P00813	P00813	Adenosine deaminase	ADA	Color2 [DarkGray]	1	4					9	9	9	29.8	29.8	29.8	40.764	0	25.326	368180000	38	25.6143	25.9608	25.7264	25.5733	25.591	25.4102
	0.433935	0.738561	P01112	P01112	GTPase HRas;GTPase HRas, N-terminally processed	HRAS	Color2 [DarkGray]	1	4					7	7	1	46.6	46.6	4.8	21.298	0	60.198	332740000	20	25.6947	25.8709	25.7787	23.6038	25.9423	25.5826
	1.5075	0.282514	P02786;Q9UP52	P02786	Transferrin receptor protein 1;Transferrin receptor protein 1, serum form	TFRC	Color2 [DarkGray]	1	4					28	28	28	42.8	42.8	42.8	84.87	0	156.38	3107300000	123	28.9294	28.9115	28.8631	28.6084	28.7699	28.4782
	0.226167	-0.14626	P04040	P04040	Catalase	CAT	Color2 [DarkGray]	1	4					11	11	11	24.9	24.9	24.9	59.755	0	45.84	443090000	35	26.3692	25.6959	25.5795	25.9283	26.1299	26.0251
	0.162634	-0.0644773	P04075;P05062	P04075	Fructose-bisphosphate aldolase A	ALDOA	Color2 [DarkGray]	1	4					34	34	29	91.2	91.2	77.7	39.42	0	323.31	71899000000	320	33.3994	33.036	33.3326	33.3789	33.1279	33.4546
	1.47104	-0.375436	P04080	P04080	Cystatin-B	CSTB	Color2 [DarkGray]	1	4					6	6	6	79.6	79.6	79.6	11.139	0	66.735	2031900000	37	27.8018	28.1248	27.7857	28.2174	28.3609	28.2603
	1.1102	0.100732	P04083	P04083	Annexin A1	ANXA1	Color2 [DarkGray]	1	4					31	31	31	75.4	75.4	75.4	38.714	0	323.31	92389000000	305	33.7572	33.6679	33.7296	33.5583	33.6199	33.6743
	0.419532	-0.481176	P04156	P04156	Major prion protein	PRNP	Color2 [DarkGray]	1	4					2	2	2	9.5	9.5	9.5	27.661	0	8.5574	138720000	15	23.6694	24.6272	23.3829	24.8131	23.7707	24.5392
	0.906524	-0.162554	P04179	P04179	Superoxide dismutase [Mn], mitochondrial	SOD2	Color2 [DarkGray]	1	4					10	10	10	34.2	34.2	34.2	24.722	0	40.754	691860000	30	26.4817	26.4227	26.6048	26.7352	26.5374	26.7244
	1.30208	-0.248411	P04181	P04181	Ornithine aminotransferase, mitochondrial;Ornithine aminotransferase, hepatic form;Ornithine aminotransferase, renal form	OAT	Color2 [DarkGray]	1	4					13	13	13	42.8	42.8	42.8	48.534	0	78.583	653580000	42	26.4724	26.2193	26.1933	26.5553	26.5275	26.5475
	0.711907	-0.12074	P04350	P04350	Tubulin beta-4A chain	TUBB4A	Color2 [DarkGray]	1	4					25	4	2	71.8	12.2	6.3	49.585	0	46.319	956740000	19	26.919	27.0152	27.1519	27.1188	27.1047	27.2248
	0.251478	0.0719465	P04406	P04406	Glyceraldehyde-3-phosphate dehydrogenase	GAPDH	Color2 [DarkGray]	1	4					24	24	23	89	89	86.9	36.053	0	323.31	299870000000	610	35.5129	35.2643	35.3073	35.2363	35.179	35.4534
	0.0927544	-0.0234299	P04632;Q96L46	P04632	Calpain small subunit 1	CAPNS1	Color2 [DarkGray]	1	4					9	9	9	61.9	61.9	61.9	28.315	0	156.2	5985100000	72	29.7894	29.5167	29.7395	29.7288	29.7471	29.64
	0.366784	-0.129568	P04792	P04792	Heat shock protein beta-1	HSPB1	Color2 [DarkGray]	1	4					18	18	18	87.3	87.3	87.3	22.782	0	323.31	19870000000	134	31.5647	31.1789	31.2925	31.5816	31.2891	31.5541
	1.39549	0.33065	P04843	P04843	Dolichyl-diphosphooligosaccharide--protein glycosyltransferase subunit 1	RPN1	Color2 [DarkGray]	1	4					28	28	28	57.8	57.8	57.8	68.569	0	260.49	5220500000	158	29.8781	29.5382	29.6305	29.3707	29.416	29.2682
	0.875464	0.182774	P04844	P04844	Dolichyl-diphosphooligosaccharide--protein glycosyltransferase subunit 2	RPN2	Color2 [DarkGray]	1	4					17	17	17	41.2	41.2	41.2	69.283	0	323.31	3884800000	90	29.1446	29.11	29.2084	28.9355	29.1473	28.8319
	0.105594	-0.0258369	P05023;P13637;P50993;Q13733;P20648;P54707	P05023	Sodium/potassium-transporting ATPase subunit alpha-1	ATP1A1	Color2 [DarkGray]	1	4					35	35	35	40.7	40.7	40.7	112.89	0	211.65	3234300000	167	28.8178	28.769	28.7583	28.8137	28.9538	28.6551
	0.280681	-0.0906855	P05026	P05026	Sodium/potassium-transporting ATPase subunit beta-1	ATP1B1	Color2 [DarkGray]	1	4					9	9	9	28.4	28.4	28.4	35.061	0	24.047	422740000	22	25.7847	25.9701	25.7059	25.9145	26.0889	25.7294
	0.0475527	-0.0221151	P05091;O94788	P05091	Aldehyde dehydrogenase, mitochondrial	ALDH2	Color2 [DarkGray]	1	4					23	20	20	47	44.1	44.1	56.381	0	104.1	2065400000	83	28.2342	28.1899	27.9594	28.1509	28.3826	27.9163
	0.142509	-0.094408	P05141;Q9H0C2	P05141	ADP/ATP translocase 2;ADP/ATP translocase 2, N-terminally processed	SLC25A5	Color2 [DarkGray]	1	4					15	6	6	43	19.5	19.5	32.852	0	32.885	2378400000	47	27.9064	28.4567	28.4951	28.2402	28.6909	28.2103
	0.666671	0.145927	P05198	P05198	Eukaryotic translation initiation factor 2 subunit 1	EIF2S1	Color2 [DarkGray]	1	4					20	20	20	61.9	61.9	61.9	36.112	0	224.05	3419200000	90	29.0483	28.8949	28.9558	28.809	28.9794	28.6729
	1.02993	0.183139	P05455	P05455	Lupus La protein	SSB	Color2 [DarkGray]	1	4					27	27	27	54.4	54.4	54.4	46.836	0	238.54	9384700000	173	30.5885	30.3239	30.5407	30.2911	30.3371	30.2754
	0.0217676	-0.0071462	P05783;CON__H-INV:HIT000015463;CON__Q92764;CON__Q497I4;Q92764	P05783	Keratin, type I cytoskeletal 18	KRT18	Color2 [DarkGray]	1	4					32	32	23	73.7	73.7	56.5	48.057	0	323.31	30866000000	271	32.0483	31.9232	32.2338	31.9793	32.1917	32.0557
	0.215509	0.133403	P06454	P06454	Prothymosin alpha;Prothymosin alpha, N-terminally processed;Thymosin alpha-1	PTMA	Color2 [DarkGray]	1	4					7	7	7	36	36	36	12.203	0	109.96	4590700000	49	29.6238	29.1036	29.5635	29.3259	28.9789	29.5858
	0.964493	-0.222832	P06493;Q00526;P11802;Q96Q40;O94921;Q07002;Q00536;Q00537;Q9NYV4;Q14004	P06493	Cyclin-dependent kinase 1	CDK1	Color2 [DarkGray]	1	4					11	11	9	42.8	42.8	36.4	34.095	0	33.286	570790000	46	26.3323	26.181	26.1938	26.5464	26.2653	26.5638
	0.176826	0.0454044	P06576	P06576	ATP synthase subunit beta, mitochondrial	ATP5B	Color2 [DarkGray]	1	4					24	24	24	62.6	62.6	62.6	56.559	0	323.31	16846000000	194	31.1968	31.2788	31.1287	31.0673	31.3306	31.0703
	0.19443	0.103449	P06703	P06703	Protein S100-A6	S100A6	Color2 [DarkGray]	1	4					8	8	8	93.3	93.3	93.3	10.18	0	62.254	23676000000	45	31.4624	31.9435	31.7876	31.897	31.3907	31.5954
	1.05128	-0.314278	P06730	P06730	Eukaryotic translation initiation factor 4E	EIF4E	Color2 [DarkGray]	1	4					5	5	5	23	23	23	25.097	0	16.782	319000000	24	25.0653	25.5156	25.3464	25.5265	25.6921	25.6514
	0.531509	0.105841	P06733	P06733	Alpha-enolase	ENO1	Color2 [DarkGray]	1	4					33	33	30	76.5	76.5	68	47.168	0	323.31	118120000000	460	34.0329	34.0613	34.0968	33.9398	33.8191	34.1145
	0.691109	0.19117	P06737	P06737	Glycogen phosphorylase, liver form	PYGL	Color2 [DarkGray]	1	4					35	29	28	44	37	35.7	97.147	0	135.51	1819100000	129	28.253	28.1477	27.8438	27.8654	27.9473	27.8583
	0.301289	0.0600243	P06744;Q8N196	P06744	Glucose-6-phosphate isomerase	GPI	Color2 [DarkGray]	1	4					28	28	23	58.6	58.6	49.1	63.146	0	323.31	42151000000	238	32.6808	32.435	32.546	32.5242	32.4169	32.5406
	1.78211	0.41672	P06748	P06748	Nucleophosmin	NPM1	Color2 [DarkGray]	1	4					15	15	15	57.5	57.5	57.5	32.575	0	323.31	38588000000	121	32.7263	32.4074	32.691	32.2419	32.1428	32.1898
	0.345784	0.189006	P06753	P06753	Tropomyosin alpha-3 chain	TPM3	Color2 [DarkGray]	1	4					24	13	9	54.4	34.7	24.9	32.95	0	130.4	7036700000	90	29.8831	29.7192	30.0669	29.6902	29.3544	30.0576
	0.105581	0.0315514	P06756	P06756	Integrin alpha-V;Integrin alpha-V heavy chain;Integrin alpha-V light chain	ITGAV	Color2 [DarkGray]	1	4					23	23	23	23.3	23.3	23.3	116.04	0	100.99	1166200000	75	27.4305	27.2785	27.3331	27.3439	27.47	27.1335
	0.104166	-0.0523338	P06865	P06865	Beta-hexosaminidase subunit alpha	HEXA	Color2 [DarkGray]	1	4					7	7	7	14.2	14.2	14.2	60.702	0	20.225	266250000	29	25.1454	25.2294	24.9897	25.0789	25.4981	24.9444
	0.025203	-0.0064017	P07099	P07099	Epoxide hydrolase 1	EPHX1	Color2 [DarkGray]	1	4					18	18	18	42.4	42.4	42.4	52.948	0	97.462	2314200000	79	28.4584	28.2408	28.2918	28.3626	28.233	28.4146
	1.78935	-0.418842	P07108	P07108	Acyl-CoA-binding protein	DBI	Color2 [DarkGray]	1	4					8	8	8	83.9	83.9	83.9	10.044	0	59.759	4950100000	60	29.1819	29.3989	29.0449	29.596	29.6226	29.6636
	0.040709	-0.0164096	P07195	P07195	L-lactate dehydrogenase B chain	LDHB	Color2 [DarkGray]	1	4					21	20	20	55.4	51.8	51.8	36.638	0	323.31	57109000000	214	32.8728	32.8304	33.1133	32.9453	32.7784	33.1421
	1.0862	0.195616	P07237	P07237	Protein disulfide-isomerase	P4HB	Color2 [DarkGray]	1	4					36	36	36	67.9	67.9	67.9	57.116	0	323.31	26953000000	244	32.0017	31.8858	32.0662	31.7445	31.7031	31.9192
	0.792583	0.133661	P07339	P07339	Cathepsin D;Cathepsin D light chain;Cathepsin D heavy chain	CTSD	Color2 [DarkGray]	1	4					15	15	15	43	43	43	44.552	0	72.363	1594000000	57	27.8863	27.8006	27.9543	27.6218	27.7859	27.8326
	2.40717	0.233191	P07355;A6NMY6	P07355;A6NMY6	Annexin A2;Putative annexin A2-like protein	ANXA2;ANXA2P2	Color2 [DarkGray]	1	4					36	36	36	81.1	81.1	81.1	38.604	0	323.31	134010000000	335	34.354	34.2848	34.3268	34.0394	34.0743	34.1523
	0.204813	-0.0409743	P07384	P07384	Calpain-1 catalytic subunit	CAPN1	Color2 [DarkGray]	1	4					22	22	22	36	36	36	81.889	0	97.763	2139100000	87	28.1045	28.2189	28.1727	28.2385	28.3078	28.0726
	1.19598	0.217519	P07437;A6NNZ2	P07437	Tubulin beta chain	TUBB	Color2 [DarkGray]	1	4					26	6	5	70.7	19.6	16.2	49.67	0	180.32	37675000000	92	32.6125	32.4062	32.3753	32.2105	32.2001	32.3309
	0.346447	0.148477	P07686	P07686	Beta-hexosaminidase subunit beta;Beta-hexosaminidase subunit beta chain B;Beta-hexosaminidase subunit beta chain A	HEXB	Color2 [DarkGray]	1	4					12	12	12	29	29	29	63.111	0	35.309	550580000	41	26.3644	26.3592	26.1866	26.16	26.443	25.8618
	0.485737	0.687044	P07711	P07711	Cathepsin L1;Cathepsin L1 heavy chain;Cathepsin L1 light chain	CTSL	Color2 [DarkGray]	1	4					4	4	4	15	15	15	37.564	0	19.945	179670000	12	25.1522	24.7562	24.3849	22.9797	24.9182	24.3344
	0.211884	-0.0831515	P07737;CON__P02584	P07737	Profilin-1	PFN1	Color2 [DarkGray]	1	4					13	13	13	91.4	91.4	91.4	15.054	0	158.61	71935000000	179	33.3375	33.1405	33.2887	33.3644	33.084	33.5677
	0.780107	0.17643	P07741	P07741	Adenine phosphoribosyltransferase	APRT	Color2 [DarkGray]	1	4					12	12	12	80	80	80	19.608	0	141.71	2331200000	61	28.4975	28.5634	28.2763	28.1744	28.2598	28.3737
	0.957363	-0.190214	P07814	P07814	Bifunctional glutamate/proline--tRNA ligase;Glutamate--tRNA ligase;Proline--tRNA ligase	EPRS	Color2 [DarkGray]	1	4					53	53	53	48.5	48.5	48.5	170.59	0	323.31	5915300000	227	29.4828	29.5088	29.709	29.8302	29.6391	29.802
	0.666543	0.236972	P07858	P07858	Cathepsin B;Cathepsin B light chain;Cathepsin B heavy chain	CTSB	Color2 [DarkGray]	1	4					8	8	8	25.4	25.4	25.4	37.821	0	84.886	1056200000	47	27.0961	27.4535	27.4362	26.9179	27.2997	27.0572
	0.894204	-0.107469	P07900;Q58FG0;Q14568;Q58FG1	P07900	Heat shock protein HSP 90-alpha	HSP90AA1	Color2 [DarkGray]	1	4					58	58	40	66	66	48.9	84.659	0	323.31	109470000000	838	33.7507	33.8274	33.9068	33.9808	33.8708	33.9557
	0.633835	-0.240201	P07910;P0DMR1;O60812;B7ZW38;B2RXH8;Q86SE5	P07910	Heterogeneous nuclear ribonucleoproteins C1/C2	HNRNPC	Color2 [DarkGray]	1	4					10	10	10	30.4	30.4	30.4	33.67	0	39.338	1456800000	40	27.7257	27.299	27.3726	27.4888	27.8033	27.8258
	1.52148	0.634366	P07942	P07942	Laminin subunit beta-1	LAMB1	Color2 [DarkGray]	1	4					15	15	15	10.8	10.8	10.8	198.04	0	87.569	519800000	47	26.2138	26.6259	26.7607	25.8916	25.7295	26.0762
	0.270471	0.232236	P07951	P07951	Tropomyosin beta chain	TPM2	Color2 [DarkGray]	1	4					26	15	3	59.5	41.9	10.6	32.85	0	96.405	3953900000	75	28.7406	29.267	29.2543	29.2339	28.2695	29.0617
	1.31085	-0.217559	P07954	P07954	Fumarate hydratase, mitochondrial	FH	Color2 [DarkGray]	1	4					11	11	11	32.7	32.7	32.7	54.636	0	74.63	886860000	42	26.7369	26.8241	26.7512	26.948	27.1298	26.887
	0.901594	-0.110265	P08133	P08133	Annexin A6	ANXA6	Color2 [DarkGray]	1	4					33	33	33	55	55	55	75.872	0	175.76	2447700000	131	28.4517	28.2672	28.3145	28.4336	28.4812	28.4494
	0.429196	-0.0593141	P08134	P08134	Rho-related GTP-binding protein RhoC	RHOC	Color2 [DarkGray]	1	4					9	9	1	53.4	53.4	6.2	22.006	0	150.09	3348500000	53	28.7542	28.8218	28.8488	28.8043	28.9706	28.8278
	1.63803	-0.197034	P08195	P08195	4F2 cell-surface antigen heavy chain	SLC3A2	Color2 [DarkGray]	1	4					31	31	31	53.2	53.2	53.2	67.993	0	323.31	21175000000	204	31.3952	31.497	31.3078	31.5897	31.6072	31.5941
	1.75284	0.484675	P08237	P08237	ATP-dependent 6-phosphofructokinase, muscle type	PFKM	Color2 [DarkGray]	1	4					20	18	17	31.7	29.4	28.2	85.182	0	64.954	849830000	61	27.1891	27.1173	27.0545	26.7456	26.3992	26.7622
	0.755587	-0.18307	P08559;P29803	P08559	Pyruvate dehydrogenase E1 component subunit alpha, somatic form, mitochondrial	PDHA1	Color2 [DarkGray]	1	4					15	15	15	43.8	43.8	43.8	43.295	0	113.35	1302700000	74	27.6189	27.2803	27.3204	27.5359	27.5878	27.645
	0.0253747	-0.0311241	P08621	P08621	U1 small nuclear ribonucleoprotein 70 kDa	SNRNP70	Color2 [DarkGray]	1	4					13	13	13	33	33	33	51.556	0	43.872	423990000	36	25.5867	25.9278	25.799	25.9701	26.3933	25.0434
	0.619468	0.0952746	P08758	P08758	Annexin A5	ANXA5	Color2 [DarkGray]	1	4					26	26	26	70.3	70.3	70.3	35.936	0	323.31	15661000000	167	31.1807	31.1253	31.1511	31.0581	30.9401	31.1731
	0.096836	-0.0610447	P09012	P09012	U1 small nuclear ribonucleoprotein A	SNRPA	Color2 [DarkGray]	1	4					7	7	5	33.7	33.7	28.4	31.279	0	20.022	585140000	26	26.1184	26.6214	26.3073	26.108	26.4207	26.7016
	0.0904393	-0.0633087	P09104	P09104	Gamma-enolase	ENO2	Color2 [DarkGray]	1	4					11	8	7	36.6	24	22.1	47.268	0	24.373	937450000	37	26.8472	27.0998	27.0128	27.2111	26.5815	27.3571
	0.4313	0.108636	P09211	P09211	Glutathione S-transferase P	GSTP1	Color2 [DarkGray]	1	4					13	13	13	61	61	61	23.356	0	323.31	28381000000	99	32.2071	31.8404	31.991	31.9124	31.9288	31.8714
	0.334715	0.100461	P09382	P09382	Galectin-1	LGALS1	Color2 [DarkGray]	1	4					9	9	9	91.1	91.1	91.1	14.716	0	149.79	12646000000	74	30.8198	30.8019	30.8991	30.7858	30.5125	30.921
	0.205761	0.201006	P09417	P09417	Dihydropteridine reductase	QDPR	Color2 [DarkGray]	1	4					7	7	7	36.9	36.9	36.9	25.789	0	32.399	291220000	24	25.7499	25.7046	24.7688	25.3065	24.8201	25.4937
	0.983596	-0.155521	P09429;B2RPK0;P23497	P09429	High mobility group protein B1	HMGB1	Color2 [DarkGray]	1	4					12	12	10	43.7	43.7	34	24.893	0	110.43	5274400000	74	29.5283	29.3355	29.4946	29.6482	29.6568	29.52
	0.8286	0.38092	P09493	P09493	Tropomyosin alpha-1 chain	TPM1	Color2 [DarkGray]	1	4					24	9	9	54.2	24.6	24.6	32.708	0	73.825	4718000000	71	29.2028	29.6259	29.802	29.3363	28.9388	29.2129
	0.312868	0.16449	P09496	P09496	Clathrin light chain A	CLTA	Color2 [DarkGray]	1	4					9	9	9	25.4	25.4	25.4	27.076	0	22.694	3676700000	37	28.997	29.0094	29.1997	29.1198	28.4953	29.0975
	0.330278	-0.174934	P09497	P09497	Clathrin light chain B	CLTB	Color2 [DarkGray]	1	4					7	7	7	23.6	23.6	23.6	25.19	0	15.699	271890000	22	24.9189	25.111	25.3629	25.4757	24.9536	25.4884
	0.917914	-0.191613	P09525	P09525	Annexin A4	ANXA4	Color2 [DarkGray]	1	4					23	23	23	58.9	58.9	58.9	35.882	0	176.28	12322000000	131	30.4982	30.7172	30.6926	30.9471	30.7094	30.8264
	1.0725	-0.553154	P09543	P09543	2,3-cyclic-nucleotide 3-phosphodiesterase	CNP	Color2 [DarkGray]	1	4					12	12	12	25.7	25.7	25.7	47.578	0	48.321	335020000	35	25.0301	24.9343	25.6864	25.6748	25.774	25.8616
	0.384528	0.0630372	P09622	P09622	Dihydrolipoyl dehydrogenase, mitochondrial	DLD	Color2 [DarkGray]	1	4					16	16	16	44.4	44.4	44.4	54.177	0	124.29	2621600000	85	28.5795	28.4508	28.6453	28.5608	28.4269	28.4988
	1.32832	-0.42277	P09651;Q32P51	P09651;Q32P51	Heterogeneous nuclear ribonucleoprotein A1;Heterogeneous nuclear ribonucleoprotein A1, N-terminally processed;Heterogeneous nuclear ribonucleoprotein A1-like 2	HNRNPA1;HNRNPA1L2	Color2 [DarkGray]	1	4					13	13	13	42.5	42.5	42.5	38.746	0	145.18	2810900000	79	28.4008	28.337	28.274	28.7133	29.0302	28.5366
	0.220375	0.0827796	P09661	P09661	U2 small nuclear ribonucleoprotein A	SNRPA1	Color2 [DarkGray]	1	4					5	5	5	20.4	20.4	20.4	28.415	0	48.262	438810000	25	26.0711	25.7499	26.2367	25.8862	25.9954	25.9277
	0.218086	-0.0278212	P09936	P09936	Ubiquitin carboxyl-terminal hydrolase isozyme L1	UCHL1	Color2 [DarkGray]	1	4					16	16	16	84.8	84.8	84.8	24.824	0	323.31	15469000000	137	31.015	31.0949	31.0615	31.0943	31.0046	31.1559
	0.559647	0.140612	P09960	P09960	Leukotriene A-4 hydrolase	LTA4H	Color2 [DarkGray]	1	4					31	31	31	61	61	61	69.284	0	312.12	6668900000	172	30.1557	29.8548	29.7998	29.7796	29.8234	29.7854
	0.159052	0.132481	P09972	P09972	Fructose-bisphosphate aldolase C	ALDOC	Color2 [DarkGray]	1	4					7	2	2	20.6	7.1	7.1	39.455	0	71.542	2554500000	44	28.5654	28.2669	27.6484	27.7413	28.2829	28.059
	1.01515	-0.18379	Q99878;Q96KK5;Q9BTM1;Q16777;Q6FI13;P20671;P0C0S8;Q93077;Q7L7L0;P04908;Q71UI9;P0C0S5;Q96QV6;P16104;Q8IUE6	Q99878;Q96KK5;Q9BTM1;Q16777;Q6FI13;P20671;P0C0S8;Q93077;Q7L7L0;P04908;Q71UI9;P0C0S5;Q96QV6;P16104	Histone H2A type 1-J;Histone H2A type 1-H;Histone H2A.J;Histone H2A type 2-C;Histone H2A type 2-A;Histone H2A type 1-D;Histone H2A type 1;Histone H2A type 1-C;Histone H2A type 3;Histone H2A type 1-B/E;Histone H2A.V;Histone H2A.Z;Histone H2A type 1-A;Histone H2AX	HIST1H2AJ;HIST1H2AH;H2AFJ;HIST2H2AC;HIST2H2AA3;HIST1H2AD;HIST1H2AG;HIST1H2AC;HIST3H2A;HIST1H2AB;H2AFV;H2AFZ;HIST1H2AA;H2AFX	Color2 [DarkGray]	1	4					4	4	4	35.9	35.9	35.9	13.936	0	29.582	1218600000	19	27.1878	27.271	27.4402	27.4878	27.5527	27.4099
	0.17875	-0.0537071	P0DMN0;P0DMM9;P50225;P50226	P0DMN0;P0DMM9	Sulfotransferase 1A4;Sulfotransferase 1A3	SULT1A4;SULT1A3	Color2 [DarkGray]	1	4					7	7	7	38.3	38.3	38.3	34.196	0	36.025	432150000	33	25.8582	25.9526	25.7268	26.0736	25.8722	25.7529
	0.00457315	-0.00237528	P0DN76;Q01081;Q8WU68	P0DN76;Q01081	Splicing factor U2AF 35 kDa subunit	U2AF1	Color2 [DarkGray]	1	4					5	5	5	25	25	25	27.872	0	19.537	296810000	20	25.4671	25.4239	25.3654	25.0921	25.5314	25.64
	0.162308	-0.0528132	P10155	P10155	60 kDa SS-A/Ro ribonucleoprotein	TROVE2	Color2 [DarkGray]	1	4					11	11	11	25.7	25.7	25.7	60.67	0	51.079	464550000	36	26.2569	25.8902	25.922	26.0977	26.0079	26.1219
	0.877213	1.31296	P10253	P10253	Lysosomal alpha-glucosidase;76 kDa lysosomal alpha-glucosidase;70 kDa lysosomal alpha-glucosidase	GAA	Color2 [DarkGray]	1	4					10	10	10	15.4	15.4	15.4	105.32	0	37.401	332160000	26	26.3624	25.8619	25.7939	25.2291	25.4953	23.355
	0.00362564	-0.00218455	P10301	P10301	Ras-related protein R-Ras	RRAS	Color2 [DarkGray]	1	4					8	8	6	45.4	45.4	33	23.48	0	43.574	736110000	28	26.6239	26.3877	26.8713	26.9079	26.4862	26.4953
	0.449372	-0.826628	P10515	P10515	Dihydrolipoyllysine-residue acetyltransferase component of pyruvate dehydrogenase complex, mitochondrial	DLAT	Color2 [DarkGray]	1	4					9	9	9	17.3	17.3	17.3	68.996	0	53.185	408800000	22	26.039	25.9576	23.6851	26.3139	26.1336	25.7141
	1.33449	-0.163564	P10599	P10599	Thioredoxin	TXN	Color2 [DarkGray]	1	4					9	9	9	65.7	65.7	65.7	11.737	0	135.82	33516000000	103	32.1001	32.0996	32.0966	32.3379	32.2993	32.1499
	0.832597	-0.412615	P10606	P10606	Cytochrome c oxidase subunit 5B, mitochondrial	COX5B	Color2 [DarkGray]	1	4					7	7	7	46.5	46.5	46.5	13.696	0	15.889	329960000	27	24.9148	25.4953	25.5336	25.5074	25.8819	25.7923
	0.608705	-0.303441	P10620	P10620	Microsomal glutathione S-transferase 1	MGST1	Color2 [DarkGray]	1	4					5	5	5	30.3	30.3	30.3	17.598	0	44.91	1368000000	28	27.0655	27.5121	27.469	27.5955	27.9754	27.3861
	0.0783009	-0.0594597	P10644;P31321	P10644	cAMP-dependent protein kinase type I-alpha regulatory subunit;cAMP-dependent protein kinase type I-alpha regulatory subunit, N-terminally processed	PRKAR1A	Color2 [DarkGray]	1	4					9	9	9	24.9	24.9	24.9	42.981	0	45.267	449460000	31	25.4458	25.837	26.3415	26.0574	25.9147	25.8307
	0.408469	-0.118441	P10768	P10768	S-formylglutathione hydrolase	ESD	Color2 [DarkGray]	1	4					11	11	11	48.2	48.2	48.2	31.462	0	79.165	1858300000	58	27.7064	27.9994	28.0913	28.1328	28.0116	28.0081
	0.0787905	-0.0107981	P10809	P10809	60 kDa heat shock protein, mitochondrial	HSPD1	Color2 [DarkGray]	1	4					48	48	48	82.2	82.2	82.2	61.054	0	323.31	104170000000	494	33.8875	33.7978	33.7719	33.7746	33.8896	33.8253
	0.226211	0.0751286	P10909	P10909	Clusterin;Clusterin beta chain;Clusterin alpha chain	CLU	Color2 [DarkGray]	1	4					4	4	4	14.9	14.9	14.9	52.494	0	23.039	152010000	15	24.5838	24.34	24.36	24.4193	24.1493	24.4898
	0.877706	0.0689564	P11021	P11021	78 kDa glucose-regulated protein	HSPA5	Color2 [DarkGray]	1	4					39	37	37	53.2	52.1	52.1	72.332	0	323.31	24174000000	299	31.7682	31.7631	31.7253	31.7035	31.6169	31.7293
	2.72667	-0.208867	P11142	P11142	Heat shock cognate 71 kDa protein	HSPA8	Color2 [DarkGray]	1	4					47	47	31	70.7	70.7	54	70.897	0	323.31	100390000000	455	33.6767	33.6625	33.5926	33.855	33.831	33.8723
	0.632407	1.10204	P11166	P11166	Solute carrier family 2, facilitated glucose transporter member 1	SLC2A1	Color2 [DarkGray]	1	4					5	5	5	12	12	12	54.083	0	34.657	452850000	17	26.3565	26.0691	26.2201	25.6379	26.1246	23.5771
	2.70239	-0.257968	P11172	P11172	Uridine 5-monophosphate synthase;Orotate phosphoribosyltransferase;Orotidine 5-phosphate decarboxylase	UMPS	Color2 [DarkGray]	1	4					19	19	19	47.9	47.9	47.9	52.221	0	88.465	1114900000	75	27.1088	27.1676	27.0835	27.4172	27.3292	27.3874
	0.411283	-0.0865059	P11177	P11177	Pyruvate dehydrogenase E1 component subunit beta, mitochondrial	PDHB	Color2 [DarkGray]	1	4					11	11	11	39.6	39.6	39.6	39.233	0	92.34	1635300000	48	27.7866	27.6261	27.8339	27.8454	27.94	27.7208
	1.28406	0.281017	P11216	P11216	Glycogen phosphorylase, brain form	PYGB	Color2 [DarkGray]	1	4					46	46	36	55.6	55.6	46.6	96.695	0	288.03	8450800000	262	30.3833	30.4492	30.2083	30.0364	30.2049	29.9564
	0.304052	0.162985	P11234	P11234	Ras-related protein Ral-B	RALB	Color2 [DarkGray]	1	4					5	5	3	24.3	24.3	15.5	23.408	0	28.359	397950000	24	25.6933	25.5949	26.2487	25.7617	25.5255	25.7608
	1.35174	-0.104483	P11413	P11413	Glucose-6-phosphate 1-dehydrogenase	G6PD	Color2 [DarkGray]	1	4					46	46	46	88.2	88.2	88.2	59.256	0	323.31	131420000000	462	34.1585	34.0412	34.1151	34.1904	34.2075	34.2304
	1.05263	-0.33252	P11498	P11498	Pyruvate carboxylase, mitochondrial	PC	Color2 [DarkGray]	1	4					11	11	11	14.1	14.1	14.1	129.63	0	31.641	367850000	33	25.3753	25.4817	25.4917	25.7258	26.0543	25.5663
	0.796988	0.100465	P11586	P11586	C-1-tetrahydrofolate synthase, cytoplasmic;Methylenetetrahydrofolate dehydrogenase;Methenyltetrahydrofolate cyclohydrolase;Formyltetrahydrofolate synthetase;C-1-tetrahydrofolate synthase, cytoplasmic, N-terminally processed	MTHFD1	Color2 [DarkGray]	1	4					44	44	44	58	58	58	101.56	0	309.19	8719500000	207	30.3608	30.3343	30.1999	30.2579	30.1732	30.1624
	0.364196	-0.118059	P11717	P11717	Cation-independent mannose-6-phosphate receptor	IGF2R	Color2 [DarkGray]	1	4					18	18	18	9	9	9	274.37	0	48.341	231010000	41	25.198	24.7694	24.8326	25.0095	25.0831	25.0615
	0.202514	0.106423	P11766	P11766	Alcohol dehydrogenase class-3	ADH5	Color2 [DarkGray]	1	4					13	13	13	47.1	47.1	47.1	39.724	0	63.581	1896300000	70	28.4009	28.0516	27.7639	28.0792	27.8002	28.0178
	1.73266	-0.405604	P12004	P12004	Proliferating cell nuclear antigen	PCNA	Color2 [DarkGray]	1	4					14	14	14	73.2	73.2	73.2	28.768	0	210.3	7420500000	92	29.732	29.8744	29.7747	30.1864	30.0383	30.3733
	0.0556133	0.0313485	P12081	P12081	Histidine--tRNA ligase, cytoplasmic	HARS	Color2 [DarkGray]	1	4					18	18	13	34.6	34.6	25.3	57.41	0	67.971	1269800000	74	27.7163	27.4765	27.1091	27.263	27.5461	27.3987
	0.493878	0.155488	P12236	P12236	ADP/ATP translocase 3;ADP/ATP translocase 3, N-terminally processed	SLC25A6	Color2 [DarkGray]	1	4					16	16	4	48.3	48.3	13.1	32.866	0	70.711	9485100000	109	30.1758	30.5093	30.5598	30.1641	30.3859	30.2285
	0.12141	0.0235875	P12268	P12268	Inosine-5-monophosphate dehydrogenase 2	IMPDH2	Color2 [DarkGray]	1	4					26	26	25	62.6	62.6	61.1	55.804	0	323.31	6299400000	178	29.8961	29.8038	29.6716	29.792	29.7978	29.711
	1.01573	-0.257299	P12270	P12270	Nucleoprotein TPR	TPR	Color2 [DarkGray]	1	4					34	34	34	20.3	20.3	20.3	267.29	0	94.041	599820000	81	26.0537	26.1819	26.4124	26.3638	26.5474	26.5086
	0.0486992	0.0137374	P12814;P35609;Q08043	P12814	Alpha-actinin-1	ACTN1	Color2 [DarkGray]	1	4					65	45	45	74.3	53.7	53.7	103.06	0	323.31	21479000000	299	31.6508	31.5811	31.3815	31.4733	31.6307	31.4682
	1.88546	-0.250512	P12931;P07947;P06241;Q9H3Y6;P42685;P06239;P07948;P08631;Q04912	P12931	Proto-oncogene tyrosine-protein kinase Src	SRC	Color2 [DarkGray]	1	4					16	16	15	40.1	40.1	38.6	59.834	0	80.278	1406800000	64	27.5825	27.4237	27.4964	27.7493	27.816	27.6889
	0.402703	-0.0893561	P12956	P12956	X-ray repair cross-complementing protein 6	XRCC6	Color2 [DarkGray]	1	4					33	33	33	52.5	52.5	52.5	69.842	0	295.76	8175200000	198	30.1278	30.1777	30.0343	30.1482	30.3677	30.0921
	0.283363	-0.0626539	P13010	P13010	X-ray repair cross-complementing protein 5	XRCC5	Color2 [DarkGray]	1	4					39	39	39	60.8	60.8	60.8	82.704	0	323.31	8324600000	200	30.0045	30.1678	30.2264	30.2114	30.2897	30.0856
	0.150339	0.0850436	P13073	P13073	Cytochrome c oxidase subunit 4 isoform 1, mitochondrial	COX4I1	Color2 [DarkGray]	1	4					6	6	6	36.1	36.1	36.1	19.576	0	18.587	641740000	30	26.066	26.679	26.6937	26.448	26.3131	26.4224
	0.0476391	0.00600561	P13489	P13489	Ribonuclease inhibitor	RNH1	Color2 [DarkGray]	1	4					22	22	22	63.1	63.1	63.1	49.973	0	188.89	3370700000	85	28.943	28.8755	28.8038	28.8918	28.8381	28.8744
	1.68286	0.178374	P13639	P13639	Elongation factor 2	EEF2	Color2 [DarkGray]	1	4					56	56	55	71.7	71.7	70.5	95.337	0	323.31	65263000000	496	33.2633	33.2453	33.2343	33.1046	32.9754	33.1279
	1.68879	0.442842	P13798	P13798	Acylamino-acid-releasing enzyme	APEH	Color2 [DarkGray]	1	4					14	14	14	26.9	26.9	26.9	81.224	0	50.591	716250000	49	27.0326	26.8137	26.7012	26.5283	26.2909	26.3998
	0.258324	-0.0532862	P13804	P13804	Electron transfer flavoprotein subunit alpha, mitochondrial	ETFA	Color2 [DarkGray]	1	4					17	17	17	70.3	70.3	70.3	35.079	0	155.03	7746300000	78	30.1575	29.9488	30.0835	30.1084	30.0259	30.2154
	0.462912	-0.35392	P13987	P13987	CD59 glycoprotein	CD59	Color2 [DarkGray]	1	4					3	3	3	25	25	25	14.177	0	12.896	473850000	20	25.2105	25.936	26.2392	26.1385	26.3736	25.9354
	0.1079	-0.126714	P14174	P14174	Macrophage migration inhibitory factor	MIF	Color2 [DarkGray]	1	4					3	3	3	35.7	35.7	35.7	12.476	0	17.972	3738800000	28	28.941	29.5154	28.2634	28.5918	29.2821	29.2259
	0.159498	0.0297559	P14314	P14314	Glucosidase 2 subunit beta	PRKCSH	Color2 [DarkGray]	1	4					18	18	18	25.9	25.9	25.9	59.425	0	144.99	3481700000	75	28.8622	28.8856	29.0638	28.9343	28.8492	28.9388
	0.322411	-0.173213	P14324	P14324	Farnesyl pyrophosphate synthase	FDPS	Color2 [DarkGray]	1	4					7	7	7	24.1	24.1	24.1	48.275	0	36.946	1169000000	40	27.1505	27.0993	27.5069	27.3403	27.1662	27.7698
	0.449198	0.178157	P14550	P14550	Alcohol dehydrogenase [NADP(+)]	AKR1A1	Color2 [DarkGray]	1	4					11	11	11	45.2	45.2	45.2	36.573	0	45.187	5374400000	52	29.4439	29.8281	29.7308	29.7356	29.3211	29.4116
	1.54471	0.309113	P14618;P30613	P14618	Pyruvate kinase PKM	PKM	Color2 [DarkGray]	1	4					48	48	48	80.2	80.2	80.2	57.936	0	323.31	285590000000	657	35.5518	35.2694	35.4667	35.1756	35.0453	35.1397
	1.37151	0.121796	P14625;Q58FF3	P14625	Endoplasmin	HSP90B1	Color2 [DarkGray]	1	4					56	56	54	60.1	60.1	58.4	92.468	0	323.31	33194000000	350	32.2577	32.1746	32.2817	32.0697	32.1589	32.1201
	0.112118	0.0430698	P14678;P63162	P14678;P63162	Small nuclear ribonucleoprotein-associated proteins B and B;Small nuclear ribonucleoprotein-associated protein N	SNRPB;SNRPN	Color2 [DarkGray]	1	4					9	9	9	30.8	30.8	30.8	24.61	0	22.536	1063800000	51	27.0654	27.4444	27.2388	27.1834	27.0705	27.3654
	0.1075	-0.0356477	P14735	P14735	Insulin-degrading enzyme	IDE	Color2 [DarkGray]	1	4					29	29	29	34.8	34.8	34.8	117.97	0	108.43	1468400000	98	27.8469	27.5648	27.4934	27.6489	27.7694	27.5938
	1.34415	-0.391687	P14866	P14866	Heterogeneous nuclear ribonucleoprotein L	HNRNPL	Color2 [DarkGray]	1	4					12	12	11	30.9	30.9	29.7	64.132	0	44.355	578980000	28	26.0794	26.0743	26.0198	26.3917	26.7067	26.2502
	0.109699	-0.0177581	P14868	P14868	Aspartate--tRNA ligase, cytoplasmic	DARS	Color2 [DarkGray]	1	4					26	26	26	57.5	57.5	57.5	57.136	0	133.95	3375900000	141	28.7932	28.8885	28.9718	28.9522	28.8565	28.898
	0.195471	0.0646776	P14923	P14923	Junction plakoglobin	JUP	Color2 [DarkGray]	1	4					23	23	19	42.1	42.1	36.5	81.744	0	148.53	1362200000	96	27.5025	27.4658	27.8631	27.5633	27.54	27.5342
	0.703545	0.121709	P15121	P15121	Aldose reductase	AKR1B1	Color2 [DarkGray]	1	4					20	20	19	69.9	69.9	67.4	35.853	0	323.31	48885000000	229	32.7533	32.7074	32.9451	32.6773	32.629	32.7344
	0.0105692	0.00763194	P15170	P15170	Eukaryotic peptide chain release factor GTP-binding subunit ERF3A	GSPT1	Color2 [DarkGray]	1	4					22	22	11	47.3	47.3	27.5	55.755	0	147.76	2823000000	106	28.5056	28.4393	28.9418	28.7035	28.2795	28.8807
	1.05592	0.3378	P15311	P15311	Ezrin	EZR	Color2 [DarkGray]	1	4					37	26	25	60.8	46.8	45.4	69.412	0	195.56	6372400000	143	30.0826	29.7812	30.0868	29.756	29.4234	29.7578
	0.24434	-0.71872	P15374	P15374	Ubiquitin carboxyl-terminal hydrolase isozyme L3	UCHL3	Color2 [DarkGray]	1	4					6	6	6	42.6	42.6	42.6	26.182	0	20.602	182940000	15	25.1694	21.7345	24.89	25.2772	24.6781	23.9948
	1.30253	0.531174	P15428	P15428	15-hydroxyprostaglandin dehydrogenase [NAD(+)]	HPGD	Color2 [DarkGray]	1	4					10	10	10	48.5	48.5	48.5	28.977	0	78.49	2144200000	55	28.3894	28.7277	28.2379	27.7181	28.1479	27.8954
	0.10889	0.0524178	P15531	P15531	Nucleoside diphosphate kinase A	NME1	Color2 [DarkGray]	1	4					13	7	7	70.4	39.5	39.5	17.149	0	77.977	6713800000	54	30.007	30.0757	29.5872	29.6848	29.8559	29.972
	0.239329	-0.0653699	P15559	P15559	NAD(P)H dehydrogenase [quinone] 1	NQO1	Color2 [DarkGray]	1	4					17	17	17	46	46	46	30.867	0	322.23	33933000000	164	32.2264	32.0749	32.2275	32.2953	32.0571	32.3724
	0.530672	0.966054	P15586	P15586	N-acetylglucosamine-6-sulfatase	GNS	Color2 [DarkGray]	1	4					11	11	11	26.4	26.4	26.4	62.081	0	36.749	240340000	23	25.2974	25.3936	25.106	22.7375	25.3582	24.8031
	1.41562	0.497693	P16070	P16070	CD44 antigen	CD44	Color2 [DarkGray]	1	4					9	9	9	11.7	11.7	11.7	81.537	0	39.577	3700700000	46	29.0576	29.5889	29.1846	28.8385	28.7213	28.7782
	1.2071	0.138434	P16152	P16152	Carbonyl reductase [NADPH] 1	CBR1	Color2 [DarkGray]	1	4					17	17	15	75.5	75.5	65	30.375	0	258.18	5212900000	111	29.6968	29.5265	29.5642	29.4488	29.436	29.4873
	0.361589	-0.791286	P16188;P13746;P04439;P30447;P30455;P30443;P05534;P01893;P30492;Q29960;P18465;P10319;Q9TNN7;P13747	P16188;P13746;P04439;P30447;P30455;P30443	HLA class I histocompatibility antigen, A-30 alpha chain;HLA class I histocompatibility antigen, A-11 alpha chain;HLA class I histocompatibility antigen, A-3 alpha chain;HLA class I histocompatibility antigen, A-23 alpha chain;HLA class I histocompatibility antigen, A-36 alpha chain;HLA class I histocompatibility antigen, A-1 alpha chain	HLA-A	Color2 [DarkGray]	1	4					11	5	3	44.7	20.8	12.6	40.904	0	16.113	274140000	16	25.2866	25.4104	22.6214	25.0861	25.3372	25.269
	0.442971	0.126846	P16278	P16278	Beta-galactosidase	GLB1	Color2 [DarkGray]	1	4					3	3	3	8.3	8.3	8.3	76.074	0	8.9917	121010000	17	24.2724	24.1452	23.9968	23.824	24.1092	24.1007
	0.531884	-0.441415	P16403;P10412;P16402;Q02539;P22492	P16403;P10412;P16402	Histone H1.2;Histone H1.4;Histone H1.3	HIST1H1C;HIST1H1E;HIST1H1D	Color2 [DarkGray]	1	4					8	8	7	26.8	26.8	23.5	21.364	0	31.114	2063300000	47	27.2468	28.2913	28.0152	28.4619	28.5022	27.9135
	0.394335	0.0826842	P16435	P16435	NADPH--cytochrome P450 reductase	POR	Color2 [DarkGray]	1	4					26	26	26	39.9	39.9	39.9	76.689	0	138.53	2238700000	115	28.1808	28.4521	28.3434	28.1879	28.2188	28.3215
	1.67434	-0.264425	P16615;O14983;Q93084	P16615	Sarcoplasmic/endoplasmic reticulum calcium ATPase 2	ATP2A2	Color2 [DarkGray]	1	4					36	36	36	40.4	40.4	40.4	114.76	0	312.39	6440900000	200	29.7171	29.5168	29.7328	29.9268	29.9473	29.886
	1.10556	0.251797	P16949;Q9H169	P16949	Stathmin	STMN1	Color2 [DarkGray]	1	4					7	7	5	43	43	31.5	17.302	0	21.39	1326600000	28	27.6909	27.854	27.4901	27.4513	27.441	27.3873
	0.895882	-0.258179	P16989	P16989	Y-box-binding protein 3	YBX3	Color2 [DarkGray]	1	4					12	6	6	48.9	37.9	37.9	40.089	0	44.219	632140000	34	26.1056	26.3441	26.4288	26.7196	26.3976	26.5358
	1.24913	-0.19389	P17174	P17174	Aspartate aminotransferase, cytoplasmic	GOT1	Color2 [DarkGray]	1	4					19	19	19	53.8	53.8	53.8	46.247	0	160.46	1587500000	77	27.7274	27.6816	27.53	27.7866	27.9227	27.8114
	0.542935	0.112533	P17252;P05771	P17252	Protein kinase C alpha type	PRKCA	Color2 [DarkGray]	1	4					11	11	11	23.1	23.1	23.1	76.749	0	41.372	524680000	39	26.2801	26.2414	26.1479	26.2277	26.1533	25.9508
	0.586078	0.0373116	P17655	P17655	Calpain-2 catalytic subunit	CAPN2	Color2 [DarkGray]	1	4					28	28	28	51.7	51.7	51.7	79.994	0	323.31	7039100000	165	29.9658	29.932	29.9577	29.9574	29.9201	29.866
	0.580794	0.140452	P17812	P17812	CTP synthase 1	CTPS1	Color2 [DarkGray]	1	4					27	27	25	58.7	58.7	54.3	66.69	0	279.75	5012300000	128	29.6623	29.5355	29.42	29.4087	29.5356	29.2521
	0.0573142	-0.0284373	P17844	P17844	Probable ATP-dependent RNA helicase DDX5	DDX5	Color2 [DarkGray]	1	4					24	17	17	42.2	30.5	30.5	69.147	0	52.504	1053800000	60	27.3426	27.0781	27.065	27.0876	27.4779	27.0054
	0.419991	-0.140921	P17858	P17858	ATP-dependent 6-phosphofructokinase, liver type	PFKL	Color2 [DarkGray]	1	4					15	11	11	30.8	24.9	24.9	85.018	0	80.855	483250000	34	25.7964	25.9167	26.0589	26.1376	26.2289	25.8283
	0.30785	0.150117	P17931	P17931	Galectin-3	LGALS3	Color2 [DarkGray]	1	4					6	6	6	28.4	28.4	28.4	26.152	0	29.312	574510000	44	26.2885	26.2776	26.638	25.9549	26.2962	26.5027
	1.26162	0.164267	P17980	P17980	26S protease regulatory subunit 6A	PSMC3	Color2 [DarkGray]	1	4					20	20	20	57.2	57.2	57.2	49.203	0	169.13	2854600000	86	28.7579	28.7687	28.6072	28.4967	28.6061	28.5382
	0.245246	0.130413	P18077	P18077	60S ribosomal protein L35a	RPL35A	Color2 [DarkGray]	1	4					10	10	10	55.5	55.5	55.5	12.538	0	28.11	1801100000	26	27.9722	28.3746	27.9625	27.9579	27.7025	28.2576
	0.231823	0.124697	P18084	P18084	Integrin beta-5	ITGB5	Color2 [DarkGray]	1	4					8	8	8	18.6	18.6	18.6	88.053	0	60.258	512970000	23	26.2053	25.9322	26.2965	26.0105	26.3371	25.7123
	0.949529	0.40382	P18085	P18085	ADP-ribosylation factor 4	ARF4	Color2 [DarkGray]	1	4					8	4	4	50	26.1	26.1	20.511	0	32.695	1541000000	23	28.2579	27.8641	27.726	27.6819	27.6467	27.3079
	0.501033	0.116543	P18206	P18206	Vinculin	VCL	Color2 [DarkGray]	1	4					51	51	51	53.8	53.8	53.8	123.8	0	323.31	20634000000	290	31.3743	31.6017	31.6942	31.4857	31.4658	31.3691
	0.666813	-0.180967	P18669;P15259;Q8N0Y7	P18669	Phosphoglycerate mutase 1	PGAM1	Color2 [DarkGray]	1	4					18	18	18	78.3	78.3	78.3	28.804	0	267.5	19356000000	155	31.3307	31.4841	31.0923	31.5133	31.3923	31.5444
	0.761326	-0.386399	P18858	P18858	DNA ligase 1	LIG1	Color2 [DarkGray]	1	4					7	7	7	10.9	10.9	10.9	101.73	0	19.178	225260000	23	25.1352	24.6214	24.361	25.1917	25.0128	25.0722
	1.56434	0.317815	P19338	P19338	Nucleolin	NCL	Color2 [DarkGray]	1	4					38	38	38	42.7	42.7	42.7	76.613	0	323.31	29668000000	230	32.3308	32.1058	32.1089	31.7656	31.9612	31.8651
	0.358363	0.206355	P19440;A6NGU5;P36268;Q14390;B5MD39	P19440;A6NGU5;P36268	Gamma-glutamyltranspeptidase 1;Gamma-glutamyltranspeptidase 1 heavy chain;Gamma-glutamyltranspeptidase 1 light chain;Putative gamma-glutamyltranspeptidase 3;Putative gamma-glutamyltranspeptidase 3 heavy chain;Putative gamma-glutamyltranspeptidase 3 light chain;Inactive gamma-glutamyltranspeptidase 2	GGT1;GGT3P;GGT2	Color2 [DarkGray]	1	4					7	7	7	14.8	14.8	14.8	61.409	0	34.845	261690000	24	25.664	25.2546	24.9897	24.8641	25.3419	25.0833
	0.0585131	0.0434685	P19525	P19525	Interferon-induced, double-stranded RNA-activated protein kinase	EIF2AK2	Color2 [DarkGray]	1	4					10	10	10	22.1	22.1	22.1	62.094	0	32.255	317160000	27	25.6734	25.487	25.1095	25.5146	25.6321	24.9928
	0.0340527	0.00798861	P19623	P19623	Spermidine synthase	SRM	Color2 [DarkGray]	1	4					10	10	10	45	45	45	33.824	0	80.963	1127800000	54	27.3842	27.3698	27.2001	27.3791	27.2062	27.3449
	1.11596	0.322835	P19784	P19784	Casein kinase II subunit alpha	CSNK2A2	Color2 [DarkGray]	1	4					10	10	10	41.7	41.7	41.7	41.213	0	42.904	340960000	23	25.8629	25.5625	25.8037	25.6161	25.2845	25.36
	1.28116	0.316772	P20020;P23634;Q01814;Q16720	P20020	Plasma membrane calcium-transporting ATPase 1	ATP2B1	Color2 [DarkGray]	1	4					21	21	21	20.6	20.6	20.6	138.75	0	76.698	796520000	57	26.9298	26.9407	26.924	26.7121	26.748	26.3839
	0.432692	-0.155495	P20042	P20042	Eukaryotic translation initiation factor 2 subunit 2	EIF2S2	Color2 [DarkGray]	1	4					11	11	11	34.8	34.8	34.8	38.388	0	62.822	1176200000	41	27.0514	27.2384	27.4888	27.5148	27.4891	27.2412
	0.202809	0.0536944	P20073	P20073	Annexin A7	ANXA7	Color2 [DarkGray]	1	4					17	17	17	35.2	35.2	35.2	52.739	0	117.17	2186000000	77	28.441	28.1252	28.2911	28.1808	28.3239	28.1915
	0.503679	0.125448	P20290	P20290	Transcription factor BTF3	BTF3	Color2 [DarkGray]	1	4					7	7	7	55.3	55.3	55.3	22.168	0	222.43	2815800000	57	28.809	28.5081	28.792	28.6275	28.481	28.6243
	0.627723	-0.119546	P20618	P20618	Proteasome subunit beta type-1	PSMB1	Color2 [DarkGray]	1	4					9	9	9	43.2	43.2	43.2	26.489	0	93.264	3698300000	63	28.8023	28.9191	29.0471	29.0066	29.1384	28.9822
	0.222331	-0.290649	P20645	P20645	Cation-dependent mannose-6-phosphate receptor	M6PR	Color2 [DarkGray]	1	4					4	4	4	19.5	19.5	19.5	30.993	0	8.0872	243680000	13	24.0154	25.0284	25.7204	25.3257	24.9661	25.3444
	0.0409236	0.0218188	P20674	P20674	Cytochrome c oxidase subunit 5A, mitochondrial	COX5A	Color2 [DarkGray]	1	4					6	6	6	32.7	32.7	32.7	16.762	0	36.065	803470000	31	26.5553	26.7755	26.9761	26.5033	26.7699	26.9683
	1.06946	0.336166	P20810	P20810	Calpastatin	CAST	Color2 [DarkGray]	1	4					11	11	11	26.4	26.4	26.4	76.572	0	96.284	398720000	29	26.087	25.8018	26.2409	25.6023	25.6722	25.8467
	0.483636	0.618669	P20839	P20839	Inosine-5-monophosphate dehydrogenase 1	IMPDH1	Color2 [DarkGray]	1	4					7	6	6	20.2	18.7	18.7	55.405	0	29.318	147580000	15	24.7897	24.7667	24.17	24.4274	24.5207	22.9224
	0.353975	0.0941525	P21281;P15313	P21281	V-type proton ATPase subunit B, brain isoform	ATP6V1B2	Color2 [DarkGray]	1	4					12	12	12	28	28	28	56.5	0	62.333	747990000	37	26.8223	26.6568	26.7249	26.7394	26.4412	26.7408
	0.205377	-0.0901775	P21283	P21283	V-type proton ATPase subunit C 1	ATP6V1C1	Color2 [DarkGray]	1	4					15	15	15	42.1	42.1	42.1	43.941	0	41.179	305670000	26	25.4894	25.1193	25.3516	25.5324	25.5497	25.1488
	0.359236	0.094595	P21291	P21291	Cysteine and glycine-rich protein 1	CSRP1	Color2 [DarkGray]	1	4					8	8	8	56	56	56	20.567	0	115.13	3545900000	56	28.8029	29.147	29.0159	28.8065	28.9527	28.9228
	0.619501	0.0991936	P21333	P21333	Filamin-A	FLNA	Color2 [DarkGray]	1	4					134	123	120	65.9	63.7	63.2	280.74	0	323.31	99938000000	1003	33.8695	33.756	33.8301	33.6904	33.8415	33.6261
	0.200252	0.0834955	P21399	P21399	Cytoplasmic aconitate hydratase	ACO1	Color2 [DarkGray]	1	4					19	19	19	26.3	26.3	26.3	98.398	0	84.265	916700000	72	27.3992	26.951	26.9146	26.9385	27.0734	27.0024
	0.845535	1.08256	P21796	P21796	Voltage-dependent anion-selective channel protein 1	VDAC1	Color2 [DarkGray]	1	4					8	8	8	40.3	40.3	40.3	30.772	0	22.047	459650000	27	26.4625	26.4374	26.2649	25.2843	26.3403	24.2925
	0.78029	0.237145	P21964	P21964	Catechol O-methyltransferase	COMT	Color2 [DarkGray]	1	4					10	10	10	48.7	48.7	48.7	30.037	0	71.833	684430000	36	26.9092	26.5045	26.8676	26.4647	26.4703	26.6349
	1.68004	-0.324551	P21980;O43548	P21980	Protein-glutamine gamma-glutamyltransferase 2	TGM2	Color2 [DarkGray]	1	4					34	34	34	50.5	50.5	50.5	77.328	0	323.31	9393100000	196	30.2718	30.0152	30.2335	30.565	30.4889	30.4402
	0.1549	0.0594107	P22059;Q969R2	P22059	Oxysterol-binding protein 1	OSBP	Color2 [DarkGray]	1	4					10	10	10	16	16	16	89.42	0	30.469	237060000	27	25.012	25.1485	24.9386	24.9855	24.7434	25.1919
	0.857416	0.283289	P22061	P22061	Protein-L-isoaspartate(D-aspartate) O-methyltransferase	PCMT1	Color2 [DarkGray]	1	4					12	12	12	70.5	70.5	70.5	24.636	0	121.94	1171200000	45	27.6012	27.2549	27.6004	27.3718	27.0208	27.214
	0.571207	0.296506	P22087	P22087	rRNA 2-O-methyltransferase fibrillarin	FBL	Color2 [DarkGray]	1	4					10	10	9	38	38	34.6	33.784	0	34.811	435130000	36	25.991	26.3867	25.7516	25.7779	25.4936	25.9683
	0.317357	-0.050216	P22102	P22102	Trifunctional purine biosynthetic protein adenosine-3;Phosphoribosylamine--glycine ligase;Phosphoribosylformylglycinamidine cyclo-ligase;Phosphoribosylglycinamide formyltransferase	GART	Color2 [DarkGray]	1	4					29	29	29	38.2	38.2	38.2	107.77	0	173.82	3395500000	138	28.951	28.8865	28.7342	28.9222	28.8944	28.9057
	0.362436	0.0667871	P22234	P22234	Multifunctional protein ADE2;Phosphoribosylaminoimidazole-succinocarboxamide synthase;Phosphoribosylaminoimidazole carboxylase	PAICS	Color2 [DarkGray]	1	4					23	23	23	53.9	53.9	53.9	47.079	0	210.92	5798200000	121	29.7314	29.756	29.5746	29.6412	29.6982	29.5223
	0.0285363	0.00711568	P22307	P22307	Non-specific lipid-transfer protein	SCP2	Color2 [DarkGray]	1	4					10	10	10	20.3	20.3	20.3	58.993	0	34.178	311440000	28	25.2751	25.486	25.4671	25.4912	25.3969	25.3188
	0.754228	0.147746	P22314	P22314	Ubiquitin-like modifier-activating enzyme 1	UBA1	Color2 [DarkGray]	1	4					40	40	40	52	52	52	117.85	0	323.31	13929000000	236	31.1147	31.0018	30.8625	30.8092	30.9492	30.7774
	0.493774	-0.173082	P22392;O60361	P22392;O60361	Nucleoside diphosphate kinase B;Putative nucleoside diphosphate kinase	NME2;NME2P1	Color2 [DarkGray]	1	4					14	14	8	79.6	79.6	48.7	17.298	0	149.71	35702000000	126	31.8848	32.3274	32.2845	32.4297	32.2275	32.3588
	1.18149	-0.432636	P22626	P22626	Heterogeneous nuclear ribonucleoproteins A2/B1	HNRNPA2B1	Color2 [DarkGray]	1	4					18	18	18	57.2	57.2	57.2	37.429	0	127.95	4302400000	118	28.8835	28.7671	28.9025	29.2831	29.5729	28.9949
	1.0244	-0.604502	P22692	P22692	Insulin-like growth factor-binding protein 4	IGFBP4	Color2 [DarkGray]	1	4					4	4	4	20.9	20.9	20.9	27.934	0	27.392	275730000	21	25.2638	24.8767	24.6596	25.447	25.9444	25.2222
	0.090037	0.0410875	P22695	P22695	Cytochrome b-c1 complex subunit 2, mitochondrial	UQCRC2	Color2 [DarkGray]	1	4					11	11	11	36	36	36	48.442	0	46.088	707130000	56	26.507	26.8435	26.5297	26.399	26.5462	26.8118
	0.0547268	-0.0322634	P23141	P23141	Liver carboxylesterase 1	CES1	Color2 [DarkGray]	1	4					6	6	6	11.1	11.1	11.1	62.52	0	12.865	78102000	18	23.7186	23.4361	23.0531	23.447	23.3177	23.5399
	0.894728	-0.273021	P23193;Q15560	P23193	Transcription elongation factor A protein 1	TCEA1	Color2 [DarkGray]	1	4					13	13	13	46.2	46.2	46.2	33.969	0	50.916	609880000	40	26.0223	26.358	26.2089	26.5127	26.6239	26.2717
	0.805937	0.39905	P23229	P23229	Integrin alpha-6;Integrin alpha-6 heavy chain;Integrin alpha-6 light chain;Processed integrin alpha-6	ITGA6	Color2 [DarkGray]	1	4					10	10	10	10.8	10.8	10.8	126.6	0	28.052	116820000	22	24.0532	24.7478	24.6051	23.901	24.1917	24.1162
	0.0994459	-0.0516504	P23246	P23246	Splicing factor, proline- and glutamine-rich	SFPQ	Color2 [DarkGray]	1	4					9	8	8	16.1	15	15	76.149	0	33.835	376900000	21	25.8782	25.5414	25.6111	25.4328	25.9597	25.7931
	0.0441197	0.0238946	P23258;Q9NRH3	P23258;Q9NRH3	Tubulin gamma-1 chain;Tubulin gamma-2 chain	TUBG1;TUBG2	Color2 [DarkGray]	1	4					9	9	9	33.9	33.9	33.9	51.169	0	44.093	268570000	26	25.3686	25.3761	24.9492	25.3788	24.9775	25.2659
	0.432738	-0.145096	P23284	P23284	Peptidyl-prolyl cis-trans isomerase B	PPIB	Color2 [DarkGray]	1	4					14	14	14	55.1	55.1	55.1	23.742	0	74.253	7392200000	108	29.6632	29.9874	30.0945	30.0186	30.1813	29.9805
	0.784919	-1.09408	P23368	P23368	NAD-dependent malic enzyme, mitochondrial	ME2	Color2 [DarkGray]	1	4					8	8	8	16.1	16.1	16.1	65.443	0	63.691	348470000	20	25.2662	25.5773	23.5266	25.8772	26.0258	25.7495
	0.0404345	-0.0238056	P23381	P23381	Tryptophan--tRNA ligase, cytoplasmic;T1-TrpRS;T2-TrpRS	WARS	Color2 [DarkGray]	1	4					17	17	17	43.7	43.7	43.7	53.165	0	90.6	1493300000	71	27.8682	27.4366	27.9415	27.568	27.7546	27.9951
	0.0487647	-0.248149	P23434	P23434	Glycine cleavage system H protein, mitochondrial	GCSH	Color2 [DarkGray]	1	4					2	2	2	17.3	17.3	17.3	18.884	0	45.824	487730000	12	26.6227	26.3389	21.9761	25.9646	26.2525	23.465
	1.08372	-0.143988	P23526	P23526	Adenosylhomocysteinase	AHCY	Color2 [DarkGray]	1	4					23	23	23	47.7	47.7	47.7	47.716	0	156.61	15230000000	187	30.9018	30.9968	31.0846	31.2046	31.1132	31.0973
	0.942697	0.105521	P23528	P23528	Cofilin-1	CFL1	Color2 [DarkGray]	1	4					18	18	14	84.9	84.9	62	18.502	0	323.31	74293000000	233	33.3476	33.4303	33.3727	33.2192	33.2454	33.3693
	1.02227	0.291201	P23588	P23588	Eukaryotic translation initiation factor 4B	EIF4B	Color2 [DarkGray]	1	4					15	15	15	26.4	26.4	26.4	69.15	0	76.333	1537800000	52	27.8757	27.6748	28.0081	27.7411	27.4354	27.5085
	0.397866	-0.162328	P23919	P23919	Thymidylate kinase	DTYMK	Color2 [DarkGray]	1	4					15	15	15	63.7	63.7	63.7	23.819	0	44.514	1500300000	79	27.4061	27.7345	27.6786	27.8046	27.511	27.9905
	0.374298	-0.199343	P24539	P24539	ATP synthase F(0) complex subunit B1, mitochondrial	ATP5F1	Color2 [DarkGray]	1	4					7	7	7	25.4	25.4	25.4	28.908	0	56.506	569320000	29	25.8116	26.3547	26.3108	26.3291	26.6136	26.1324
	0.725831	-0.215974	P24666	P24666	Low molecular weight phosphotyrosine protein phosphatase	ACP1	Color2 [DarkGray]	1	4					6	6	6	54.4	54.4	54.4	18.042	0	83.062	818170000	35	26.6084	26.9897	26.5865	27.0194	26.9055	26.9075
	1.15057	-0.42513	P24752	P24752	Acetyl-CoA acetyltransferase, mitochondrial	ACAT1	Color2 [DarkGray]	1	4					18	18	18	52.9	52.9	52.9	45.199	0	93.092	2730000000	86	27.9998	28.442	28.5423	28.7932	28.8109	28.6554
	0.32422	-0.0582631	P25205	P25205	DNA replication licensing factor MCM3	MCM3	Color2 [DarkGray]	1	4					19	19	19	29.7	29.7	29.7	90.98	0	122.07	1384700000	80	27.5239	27.6413	27.5481	27.5081	27.7283	27.6516
	0.356896	-0.0682011	P25325	P25325	3-mercaptopyruvate sulfurtransferase	MPST	Color2 [DarkGray]	1	4					12	12	12	54.5	54.5	54.5	33.178	0	67.839	1857400000	46	28.1272	28.2022	28.1674	28.1144	28.3765	28.2106
	0.0517217	0.019783	P25705	P25705	ATP synthase subunit alpha, mitochondrial	ATP5A1	Color2 [DarkGray]	1	4					27	27	27	53.9	53.9	53.9	59.75	0	259.27	11632000000	156	30.5231	30.8571	30.6172	30.5318	30.8148	30.5915
	1.61626	-0.175114	P25786	P25786	Proteasome subunit alpha type-1	PSMA1	Color2 [DarkGray]	1	4					19	19	19	77.2	77.2	77.2	29.555	0	130.76	4233100000	120	29.1518	29.0456	29.1367	29.3601	29.254	29.2454
	0.0557407	0.0194422	P25787	P25787	Proteasome subunit alpha type-2	PSMA2	Color2 [DarkGray]	1	4					8	8	8	45.7	45.7	45.7	25.898	0	154.7	3430400000	49	29.0099	28.9626	28.7561	28.9993	28.9632	28.7077
	0.390256	-0.240514	P25788	P25788	Proteasome subunit alpha type-3	PSMA3	Color2 [DarkGray]	1	4					12	12	12	38.8	38.8	38.8	28.433	0	43.466	2954300000	65	28.5508	28.6522	28.4845	28.8927	28.3228	29.1934
	2.12545	-0.204625	P25789	P25789	Proteasome subunit alpha type-4	PSMA4	Color2 [DarkGray]	1	4					15	15	15	75.1	75.1	75.1	29.483	0	140.85	4201200000	84	29.0011	29.0994	29.1201	29.3048	29.2862	29.2434
	1.17626	0.330453	P26038	P26038	Moesin	MSN	Color2 [DarkGray]	1	4					45	45	32	70.4	70.4	52.3	67.819	0	317.41	19920000000	283	31.7629	31.4061	31.7224	31.3842	31.1638	31.3521
	0.021737	-0.00617981	P26196	P26196	Probable ATP-dependent RNA helicase DDX6	DDX6	Color2 [DarkGray]	1	4					19	19	19	47.6	47.6	47.6	54.416	0	100.53	1374100000	79	27.6398	27.6418	27.4574	27.4775	27.5566	27.7235
	0.272565	0.164076	P26368	P26368	Splicing factor U2AF 65 kDa subunit	U2AF2	Color2 [DarkGray]	1	4					11	11	11	33.1	33.1	33.1	53.5	0	126.3	1080600000	51	27.6255	27.2274	27.0959	26.9228	27.5101	27.0237
	0.3729	-0.226679	P26447	P26447	Protein S100-A4	S100A4	Color2 [DarkGray]	1	4					5	5	5	36.6	36.6	36.6	11.728	0	15.767	4083600000	31	28.7782	28.9353	29.3952	29.22	28.9838	29.5851
	0.457183	-0.777861	P26583	P26583	High mobility group protein B2	HMGB2	Color2 [DarkGray]	1	4					7	5	5	37.3	27.3	27.3	24.033	0	21.808	279860000	21	25.184	23.1942	25.5214	25.407	25.5991	25.227
	0.448225	-0.123243	P26599	P26599	Polypyrimidine tract-binding protein 1	PTBP1	Color2 [DarkGray]	1	4					11	11	10	34.3	34.3	32.8	57.221	0	255.96	2975300000	70	28.6555	28.6144	28.5749	28.645	28.9687	28.6008
	1.56207	0.246272	P26639	P26639	Threonine--tRNA ligase, cytoplasmic	TARS	Color2 [DarkGray]	1	4					36	36	34	54.9	54.9	52.7	83.434	0	203.48	4979800000	177	29.6471	29.5291	29.5859	29.3604	29.2218	29.4411
	1.67031	0.362368	P26640	P26640	Valine--tRNA ligase	VARS	Color2 [DarkGray]	1	4					27	27	27	29.2	29.2	29.2	140.47	0	138.85	1663800000	112	28.2104	28.0161	27.8803	27.666	27.636	27.7177
	0.544568	-0.826222	P26885	P26885	Peptidyl-prolyl cis-trans isomerase FKBP2	FKBP2	Color2 [DarkGray]	1	4					6	6	6	52.1	52.1	52.1	15.649	0	25.357	314740000	19	25.6901	23.5417	25.3219	25.744	25.8045	25.4839
	0.471091	-0.156314	P27105	P27105	Erythrocyte band 7 integral membrane protein	STOM	Color2 [DarkGray]	1	4					6	6	6	38.5	38.5	38.5	31.73	0	104.02	1039700000	23	27.3326	26.9356	26.9245	27.2052	27.3163	27.1401
	0.613291	0.474583	P27144	P27144	Adenylate kinase 4, mitochondrial	AK4	Color2 [DarkGray]	1	4					7	7	7	48	48	48	25.268	0	13.949	174180000	20	24.8703	25.1443	24.9606	24.8113	23.8432	24.8969
	0.352264	-0.135694	P27348	P27348	14-3-3 protein theta	YWHAQ	Color2 [DarkGray]	1	4					21	18	15	59.6	56.3	49.8	27.764	0	323.31	19172000000	116	31.3072	31.3166	31.31	31.6213	31.1273	31.5923
	0.242028	-0.0307935	P27694	P27694	Replication protein A 70 kDa DNA-binding subunit;Replication protein A 70 kDa DNA-binding subunit, N-terminally processed	RPA1	Color2 [DarkGray]	1	4					18	18	18	35.9	35.9	35.9	68.137	0	102.14	1037200000	70	27.1635	27.1323	27.1785	27.1776	27.2776	27.1114
	1.94628	0.351482	P27695	P27695	DNA-(apurinic or apyrimidinic site) lyase;DNA-(apurinic or apyrimidinic site) lyase, mitochondrial	APEX1	Color2 [DarkGray]	1	4					17	17	17	58.2	58.2	58.2	35.554	0	149.24	1956700000	70	28.2893	28.2455	28.3377	27.9637	27.7999	28.0545
	0.00117831	-0.000241597	P27708	P27708	CAD protein;Glutamine-dependent carbamoyl-phosphate synthase;Aspartate carbamoyltransferase;Dihydroorotase	CAD	Color2 [DarkGray]	1	4					68	68	67	41.7	41.7	41.3	242.98	0	323.31	7495700000	306	30.1488	29.9615	29.9642	30.0645	30.0324	29.9784
	0.0989179	-0.0255044	P27797	P27797	Calreticulin	CALR	Color2 [DarkGray]	1	4					17	17	17	62.4	62.4	62.4	48.141	0	323.31	16743000000	158	31.0645	31.1944	31.2871	31.233	31.0823	31.3073
	0.87318	0.177031	P27816	P27816	Microtubule-associated protein 4	MAP4	Color2 [DarkGray]	1	4					31	31	31	38.5	38.5	38.5	121	0	213.52	2129000000	114	28.3158	28.1284	28.4254	28.0394	28.1383	28.1608
	0.867925	0.218492	P27824	P27824	Calnexin	CANX	Color2 [DarkGray]	1	4					30	30	29	46.5	46.5	44.4	67.567	0	216.49	12615000000	177	31.0964	30.6991	30.8766	30.655	30.6445	30.7171
	0.146986	0.0430253	P28066	P28066	Proteasome subunit alpha type-5	PSMA5	Color2 [DarkGray]	1	4					11	11	11	54.8	54.8	54.8	26.411	0	138.85	4505800000	66	29.4076	29.2266	29.2835	29.2323	29.4403	29.116
	0.678173	-0.240782	P28070	P28070	Proteasome subunit beta type-4	PSMB4	Color2 [DarkGray]	1	4					7	7	7	39.4	39.4	39.4	29.204	0	94.894	1473400000	31	27.2538	27.8101	27.5525	27.7596	27.8057	27.7734
	0.0511647	0.0389436	P28072	P28072	Proteasome subunit beta type-6	PSMB6	Color2 [DarkGray]	1	4					8	8	8	46	46	46	25.357	0	209.96	2034500000	25	28.097	28.1618	28.2864	28.0911	27.7282	28.6092
	0.495499	-0.143834	P28074	P28074	Proteasome subunit beta type-5	PSMB5	Color2 [DarkGray]	1	4					14	14	14	63.5	63.5	63.5	28.48	0	105.48	3211000000	62	28.6502	28.6486	28.9266	28.9793	28.7126	28.9651
	0.0511095	0.0391273	P28288	P28288	ATP-binding cassette sub-family D member 3	ABCD3	Color2 [DarkGray]	1	4					8	8	8	14.1	14.1	14.1	75.475	0	25.402	199790000	29	25.0588	24.7133	24.5871	24.554	25.1903	24.4974
	0.234867	-0.111681	P28340	P28340	DNA polymerase delta catalytic subunit	POLD1	Color2 [DarkGray]	1	4					13	13	13	15.7	15.7	15.7	123.63	0	37.645	194630000	22	24.344	24.5746	24.9474	24.8297	24.7573	24.614
	0.585896	-0.126143	P28482	P28482	Mitogen-activated protein kinase 1	MAPK1	Color2 [DarkGray]	1	4					14	14	11	50.6	50.6	41.9	41.389	0	94.757	673840000	55	26.4166	26.5496	26.3912	26.5972	26.4272	26.7115
	1.15387	0.135721	P28838	P28838	Cytosol aminopeptidase	LAP3	Color2 [DarkGray]	1	4					19	19	19	49.7	49.7	49.7	56.166	0	95.741	1462200000	73	27.7386	27.67	27.8008	27.5871	27.6765	27.5385
	0.194041	-0.176585	P29144	P29144	Tripeptidyl-peptidase 2	TPP2	Color2 [DarkGray]	1	4					13	13	13	12.7	12.7	12.7	138.35	0	33.441	164980000	28	23.6615	24.5872	24.5647	24.4008	24.179	24.7633
	1.0745	0.23421	P29218	P29218	Inositol monophosphatase 1	IMPA1	Color2 [DarkGray]	1	4					7	7	7	32.1	32.1	32.1	30.188	0	21.355	197870000	19	24.7492	24.8189	24.9701	24.6616	24.4571	24.717
	0.891665	0.331275	P29323;P54762;Q15375	P29323	Ephrin type-B receptor 2	EPHB2	Color2 [DarkGray]	1	4					9	8	8	11.1	10	10	117.49	0	25.299	130760000	22	24.5015	24.3665	24.1749	24.0807	23.7393	24.2291
	0.243087	-0.0382004	P29401	P29401	Transketolase	TKT	Color2 [DarkGray]	1	4					42	42	42	83.5	83.5	83.5	67.877	0	323.31	133740000000	501	34.2501	34.0972	34.1041	34.2178	34.1154	34.2329
	0.388631	0.305859	P29966	P29966	Myristoylated alanine-rich C-kinase substrate	MARCKS	Color2 [DarkGray]	1	4					6	6	6	32.5	32.5	32.5	31.554	0	56.978	650330000	40	26.935	26.1046	26.9178	26.6202	25.9889	26.4306
	0.0950358	0.0707277	P30040	P30040	Endoplasmic reticulum resident protein 29	ERP29	Color2 [DarkGray]	1	4					8	8	8	34.1	34.1	34.1	28.993	0	25.93	779750000	35	26.7256	27.042	26.5316	26.314	27.078	26.695
	0.660064	0.0863953	P30043	P30043	Flavin reductase (NADPH)	BLVRB	Color2 [DarkGray]	1	4					13	13	13	83.5	83.5	83.5	22.119	0	160.72	6739400000	103	30.0076	29.8214	29.9633	29.8152	29.8802	29.8377
	0.517053	-0.200221	P30044	P30044	Peroxiredoxin-5, mitochondrial	PRDX5	Color2 [DarkGray]	1	4					8	8	8	44.9	44.9	44.9	22.086	0	74.821	2017700000	47	28.026	28.1484	27.8243	27.9659	28.454	28.1794
	1.18409	-0.268686	P30046;A6NHG4	P30046;A6NHG4	D-dopachrome decarboxylase;D-dopachrome decarboxylase-like protein	DDT;DDTL	Color2 [DarkGray]	1	4					8	8	8	50.8	50.8	50.8	12.712	0	39.802	978400000	43	26.8254	27.1311	26.8292	27.2597	27.1451	27.187
	1.08931	-0.301626	P30048	P30048	Thioredoxin-dependent peroxide reductase, mitochondrial	PRDX3	Color2 [DarkGray]	1	4					10	10	10	55.1	55.1	55.1	27.692	0	125.58	6196700000	71	29.7711	29.3928	29.5523	29.7941	30.0136	29.8133
	0.885231	0.19251	P30084	P30084	Enoyl-CoA hydratase, mitochondrial	ECHS1	Color2 [DarkGray]	1	4					11	11	11	40.3	40.3	40.3	31.387	0	145.72	2451000000	69	28.387	28.6906	28.4938	28.4147	28.3329	28.2464
	0.600838	-0.259973	P30085	P30085	UMP-CMP kinase	CMPK1	Color2 [DarkGray]	1	4					8	8	8	53.1	53.1	53.1	22.222	0	57.177	1133200000	46	27.3915	27.2701	26.8002	27.5447	27.3956	27.3014
	1.79305	0.255411	P30086	P30086	Phosphatidylethanolamine-binding protein 1;Hippocampal cholinergic neurostimulating peptide	PEBP1	Color2 [DarkGray]	1	4					13	13	13	80.7	80.7	80.7	21.057	0	236.71	8293600000	101	30.424	30.2657	30.2509	30.0922	29.9948	30.0874
	1.17362	0.200774	P30101	P30101	Protein disulfide-isomerase A3	PDIA3	Color2 [DarkGray]	1	4					34	34	34	64.2	64.2	64.2	56.782	0	323.31	19047000000	239	31.5081	31.4634	31.4704	31.3396	31.1229	31.3771
	0.832682	-0.144877	P30153	P30153	Serine/threonine-protein phosphatase 2A 65 kDa regulatory subunit A alpha isoform	PPP2R1A	Color2 [DarkGray]	1	4					31	31	24	61.1	61.1	47.7	65.308	0	299.12	8504000000	164	30.0913	30.0702	30.3063	30.3241	30.2438	30.3346
	0.515813	0.161082	P30419	P30419	Glycylpeptide N-tetradecanoyltransferase 1	NMT1	Color2 [DarkGray]	1	4					11	11	8	29.6	29.6	22.2	56.806	0	68.984	746190000	42	27.0706	26.7291	26.6932	26.6744	26.7813	26.554
	0.249283	-0.122002	P30453;P30457;P30450;P18462;P30456;P16190;P30459;P10314;P30512;P10316;P01891;P01892;Q31610;P30486;Q09160;P30511;Q95604	P30453;P30457;P30450;P18462;P30456;P16190;P30459;P10314;P30512;P10316;P01891	HLA class I histocompatibility antigen, A-34 alpha chain;HLA class I histocompatibility antigen, A-66 alpha chain;HLA class I histocompatibility antigen, A-26 alpha chain;HLA class I histocompatibility antigen, A-25 alpha chain;HLA class I histocompatibility antigen, A-43 alpha chain;HLA class I histocompatibility antigen, A-33 alpha chain;HLA class I histocompatibility antigen, A-74 alpha chain;…	HLA-A	Color2 [DarkGray]	1	4					12	12	1	50.1	50.1	3.3	41.054	0	85.287	721320000	42	26.2228	26.769	26.766	26.718	26.5856	26.8201
	0.295208	0.133085	P30519	P30519	Heme oxygenase 2	HMOX2	Color2 [DarkGray]	1	4					7	7	7	27.2	27.2	27.2	36.032	0	25.596	264760000	19	25.2216	25.4378	25.0336	24.8224	25.284	25.1873
	0.325426	-0.687425	P30533	P30533	Alpha-2-macroglobulin receptor-associated protein	LRPAP1	Color2 [DarkGray]	1	4					7	7	7	20.2	20.2	20.2	41.465	0	13.461	261670000	22	25.4996	25.304	22.8307	25.2873	25.4164	24.993
	1.22441	0.323468	P30566	P30566	Adenylosuccinate lyase	ADSL	Color2 [DarkGray]	1	4					11	11	11	38	38	38	54.889	0	96.917	1103000000	44	27.4689	27.338	27.6411	27.2798	26.9885	27.2092
	1.15824	-0.789021	P30622;Q9UDT6	P30622	CAP-Gly domain-containing linker protein 1	CLIP1	Color2 [DarkGray]	1	4					30	30	30	24.5	24.5	24.5	162.24	0	94.896	536820000	72	25.1046	26.0155	25.8773	26.6002	26.6081	26.1563
	1.08598	-0.221993	P30626	P30626	Sorcin	SRI	Color2 [DarkGray]	1	4					9	9	9	49.5	49.5	49.5	21.676	0	36.498	894380000	44	26.753	26.893	26.8439	26.9547	27.2254	26.9757
	0.551491	-0.258381	P30740	P30740	Leukocyte elastase inhibitor	SERPINB1	Color2 [DarkGray]	1	4					14	13	13	40.9	38.3	38.3	42.741	0	78.485	1073500000	60	26.6808	27.3514	27.0485	27.1765	27.4258	27.2537
	1.38677	-0.272962	P30837	P30837	Aldehyde dehydrogenase X, mitochondrial	ALDH1B1	Color2 [DarkGray]	1	4					18	16	15	42	40.2	38.7	57.206	0	102.09	1513100000	56	27.5802	27.665	27.3889	27.8059	27.8956	27.7516
	1.61251	0.530392	P30838;P48448	P30838	Aldehyde dehydrogenase, dimeric NADP-preferring	ALDH3A1	Color2 [DarkGray]	1	4					23	23	22	58.7	58.7	56.1	50.394	0	192.48	8941700000	127	30.4361	30.4395	30.7766	30.0519	29.8342	30.1749
	0.891294	-1.05087	P30876	P30876	DNA-directed RNA polymerase II subunit RPB2	POLR2B	Color2 [DarkGray]	1	4					12	12	12	13.1	13.1	13.1	133.9	0	28.103	126450000	25	23.787	24.0878	22.3614	24.2211	24.6922	24.4754
	0.900686	-0.515997	P31040	P31040	Succinate dehydrogenase [ubiquinone] flavoprotein subunit, mitochondrial	SDHA	Color2 [DarkGray]	1	4					16	16	16	28.9	28.9	28.9	72.691	0	51.096	512400000	52	25.3082	25.9858	25.9314	26.3413	26.4754	25.9566
	1.48874	0.400958	P31150	P31150	Rab GDP dissociation inhibitor alpha	GDI1	Color2 [DarkGray]	1	4					20	12	12	56.4	39.1	39.1	50.582	0	85.706	632180000	40	26.5881	26.8463	26.5619	26.2737	26.4079	26.1118
	1.53716	-0.461781	P31153;Q00266	P31153	S-adenosylmethionine synthase isoform type-2	MAT2A	Color2 [DarkGray]	1	4					15	15	15	39.7	39.7	39.7	43.66	0	59.958	2672700000	88	28.0227	28.4337	28.2364	28.7071	28.8088	28.5623
	1.76454	0.201976	P31327	P31327	Carbamoyl-phosphate synthase [ammonia], mitochondrial	CPS1	Color2 [DarkGray]	1	4					53	52	52	46.1	45.5	45.5	164.94	0	323.31	6490200000	254	29.8951	29.981	29.9324	29.6942	29.8242	29.6843
	0.0974876	-0.015206	P31689	P31689	DnaJ homolog subfamily A member 1	DNAJA1	Color2 [DarkGray]	1	4					15	15	15	48.1	48.1	48.1	44.868	0	141.9	2590600000	81	28.4475	28.5957	28.4438	28.5344	28.4611	28.5372
	0.440668	0.417943	P31751	P31751	RAC-beta serine/threonine-protein kinase	AKT2	Color2 [DarkGray]	1	4					5	5	4	12.3	12.3	10.6	55.768	0	12.227	148010000	16	24.1955	24.7431	24.5962	24.4196	24.5111	23.3502
	0.0705498	0.0182298	P31930	P31930	Cytochrome b-c1 complex subunit 1, mitochondrial	UQCRC1	Color2 [DarkGray]	1	4					14	14	13	40.2	40.2	38.8	52.645	0	59.164	609640000	40	26.2991	26.374	26.565	26.3147	26.4033	26.4654
	0.0535301	-0.0647475	P31937	P31937	3-hydroxyisobutyrate dehydrogenase, mitochondrial	HIBADH	Color2 [DarkGray]	1	4					7	7	7	29.8	29.8	29.8	35.329	0	54.055	295990000	25	25.7555	25.4093	24.5794	25.1423	25.7638	25.0323
	2.62641	-0.181849	P31939	P31939	Bifunctional purine biosynthesis protein PURH;Phosphoribosylaminoimidazolecarboxamide formyltransferase;IMP cyclohydrolase	ATIC	Color2 [DarkGray]	1	4					34	34	34	74.7	74.7	74.7	64.615	0	323.31	9267000000	183	30.2894	30.1991	30.2438	30.4347	30.4188	30.4243
	0.381054	-0.0932541	P31943	P31943	Heterogeneous nuclear ribonucleoprotein H;Heterogeneous nuclear ribonucleoprotein H, N-terminally processed	HNRNPH1	Color2 [DarkGray]	1	4					13	11	7	39.4	33.4	21.4	49.229	0	90.892	2378000000	57	28.2654	28.4753	28.1405	28.4504	28.3651	28.3453
	0.252752	0.0930347	P31946	P31946	14-3-3 protein beta/alpha;14-3-3 protein beta/alpha, N-terminally processed	YWHAB	Color2 [DarkGray]	1	4					16	9	9	64.2	48	48	28.082	0	190.28	4264000000	41	29.2296	29.0315	29.4615	29.1598	29.0093	29.2744
	0.228864	-0.0783908	P31947	P31947	14-3-3 protein sigma	SFN	Color2 [DarkGray]	1	4					19	15	15	69.8	56.9	56.9	27.774	0	252.98	8069400000	86	30.0437	29.9883	30.1831	30.1051	29.9666	30.3786
	0.17441	-0.0718492	P31948	P31948	Stress-induced-phosphoprotein 1	STIP1	Color2 [DarkGray]	1	4					46	46	46	67.4	67.4	67.4	62.639	0	262.74	18078000000	247	31.3195	31.0941	31.3807	31.4012	31.087	31.5216
	0.589622	0.478959	P31949	P31949	Protein S100-A11;Protein S100-A11, N-terminally processed	S100A11	Color2 [DarkGray]	1	4					7	7	7	82.9	82.9	82.9	11.74	0	123.68	6282600000	42	30.1934	29.5662	30.2505	29.8043	28.9463	29.8226
	0.536513	-0.950339	P32322	P32322	Pyrroline-5-carboxylate reductase 1, mitochondrial	PYCR1	Color2 [DarkGray]	1	4					7	7	6	31.7	31.7	27.6	33.36	0	36.065	237170000	18	22.7637	25.123	24.9255	25.5066	25.3172	24.8393
	0.287593	-0.0269826	P33176;O60282;Q12840	P33176	Kinesin-1 heavy chain	KIF5B	Color2 [DarkGray]	1	4					36	36	36	45.3	45.3	45.3	109.68	0	282.63	2865000000	168	28.6723	28.637	28.5995	28.7022	28.6867	28.6008
	0.939968	-0.356851	P33316	P33316	Deoxyuridine 5-triphosphate nucleotidohydrolase, mitochondrial	DUT	Color2 [DarkGray]	1	4					7	7	7	38.5	38.5	38.5	26.563	0	63.983	1187400000	50	27.4031	27.2034	26.8535	27.3756	27.6376	27.5174
	0.637399	-0.327864	P33527	P33527	Multidrug resistance-associated protein 1	ABCC1	Color2 [DarkGray]	1	4					27	27	26	21.3	21.3	20.7	171.59	0	147.67	958050000	78	27.1612	26.6901	26.6398	27.1624	27.4367	26.8755
	1.57742	-0.336973	P33991	P33991	DNA replication licensing factor MCM4	MCM4	Color2 [DarkGray]	1	4					22	22	22	34.6	34.6	34.6	96.557	0	88.891	1460500000	80	27.6296	27.307	27.4297	27.7526	27.8468	27.7777
	0.133755	0.0348371	P33992	P33992	DNA replication licensing factor MCM5	MCM5	Color2 [DarkGray]	1	4					25	25	25	42.9	42.9	42.9	82.285	0	95.286	819150000	74	26.896	26.7269	26.7971	26.7275	26.9316	26.6563
	1.66994	-0.313436	P33993	P33993	DNA replication licensing factor MCM7	MCM7	Color2 [DarkGray]	1	4					27	27	27	45.8	45.8	45.8	81.307	0	142.53	1528800000	96	27.5131	27.6665	27.434	27.7857	27.9525	27.8157
	0.515919	1.34531	P34896	P34896	Serine hydroxymethyltransferase, cytosolic	SHMT1	Color2 [DarkGray]	1	4					9	8	8	30.6	27.7	27.7	53.082	0	28.598	287320000	24	25.82	25.4287	25.3269	25.3893	25.2371	21.9133
	0.171771	-0.0370515	P34897	P34897	Serine hydroxymethyltransferase, mitochondrial	SHMT2	Color2 [DarkGray]	1	4					21	21	20	53.6	53.6	50.8	55.992	0	169.38	3187700000	112	28.7487	28.7642	28.7413	28.7625	28.9405	28.6624
	1.71313	-0.196362	P34932	P34932	Heat shock 70 kDa protein 4	HSPA4	Color2 [DarkGray]	1	4					48	48	44	67.4	67.4	61.8	94.33	0	323.31	12764000000	262	30.7449	30.6982	30.6425	30.8695	30.9738	30.8313
	0.338753	0.127364	P35221;Q9UI47	P35221	Catenin alpha-1	CTNNA1	Color2 [DarkGray]	1	4					29	29	24	47.2	47.2	40.1	100.07	0	226.31	2457400000	119	28.7191	28.3484	28.3488	28.3065	28.5238	28.204
	1.58715	0.388661	P35222	P35222	Catenin beta-1	CTNNB1	Color2 [DarkGray]	1	4					17	13	13	27.9	22.5	22.5	85.496	0	52.584	394540000	49	26.0124	25.8126	26.072	25.738	25.5003	25.4927
	1.37831	0.347491	P35232	P35232	Prohibitin	PHB	Color2 [DarkGray]	1	4					12	12	12	59.9	59.9	59.9	29.804	0	97.762	1536700000	52	27.8365	28.0611	28.0055	27.4728	27.5863	27.8015
	0.177354	0.0864741	P35237	P35237	Serpin B6	SERPINB6	Color2 [DarkGray]	1	4					15	15	14	49.2	49.2	47.1	42.621	0	127.05	1568500000	70	27.9942	27.9522	27.5001	27.9099	27.6953	27.5818
	0.971571	0.187266	P35241	P35241	Radixin	RDX	Color2 [DarkGray]	1	4					32	18	18	47	27.8	27.8	68.563	0	110.08	2161700000	83	28.4349	28.1459	28.3893	28.1158	28.15	28.1424
	0.345204	0.108892	P35244	P35244	Replication protein A 14 kDa subunit	RPA3	Color2 [DarkGray]	1	4					6	6	6	67.8	67.8	67.8	13.569	0	59.22	891690000	35	27.1504	26.9737	26.8143	26.8572	27.0284	26.7261
	0.73592	0.263605	P35268	P35268	60S ribosomal protein L22	RPL22	Color2 [DarkGray]	1	4					5	5	5	41.4	41.4	41.4	14.787	0	102.71	4707900000	25	29.2351	29.667	29.5462	29.2478	29.3799	29.0299
	0.661058	-0.109565	P35270;REV__Q16649	P35270	Sepiapterin reductase	SPR	Color2 [DarkGray]	1	4					11	11	11	48.3	48.3	48.3	28.048	0	95.329	1570600000	52	27.7551	27.7596	27.699	27.9701	27.7191	27.8531
	0.0597604	0.00996399	P35579;REV__Q9UKV3	P35579	Myosin-9	MYH9	Color2 [DarkGray]	1	4					144	144	117	61.9	61.9	49.8	226.53	0	323.31	75578000000	978	33.3801	33.2804	33.4661	33.3955	33.324	33.3772
	1.46184	-0.144898	P35580	P35580	Myosin-10	MYH10	Color2 [DarkGray]	1	4					57	36	34	31.9	22.6	21.5	229	0	162.91	1188100000	113	27.3343	27.2104	27.2983	27.459	27.4477	27.3711
	0.822064	-0.16211	P35606	P35606	Coatomer subunit beta	COPB2	Color2 [DarkGray]	1	4					29	29	29	40.7	40.7	40.7	102.49	0	96.95	2040100000	111	28.0691	28.0637	27.9784	28.2792	28.292	28.0263
	0.45538	-0.863436	P35613	P35613	Basigin	BSG	Color2 [DarkGray]	1	4					5	5	5	18.4	18.4	18.4	42.2	0	34.606	545600000	25	23.9669	26.3953	26.4372	26.4058	26.4444	26.5395
	1.02168	0.210854	P35637	P35637	RNA-binding protein FUS	FUS	Color2 [DarkGray]	1	4					8	8	6	15.8	15.8	15.8	53.425	0	63.283	1251800000	45	27.7446	27.4258	27.5513	27.4072	27.3709	27.3109
	0.705745	-0.408328	P35754	P35754	Glutaredoxin-1	GLRX	Color2 [DarkGray]	1	4					3	3	3	31.1	31.1	31.1	11.776	0	8.8447	149620000	18	24.1099	24.1306	24.3625	24.1306	24.9815	24.7159
	0.448376	-0.0951494	P35998	P35998	26S protease regulatory subunit 7	PSMC2	Color2 [DarkGray]	1	4					27	27	27	62.4	62.4	62.4	48.633	0	149.37	3097100000	150	28.7594	28.7252	28.6217	28.9248	28.821	28.6459
	0.709105	1.047	P36404	P36404	ADP-ribosylation factor-like protein 2	ARL2	Color2 [DarkGray]	1	4					4	4	4	22.8	22.8	22.8	20.878	0	17.741	271890000	17	25.9967	25.6302	25.1526	24.9978	23.3047	25.3359
	0.422491	-0.276349	P36405	P36405	ADP-ribosylation factor-like protein 3	ARL3	Color2 [DarkGray]	1	4					8	8	8	58.2	58.2	58.2	20.455	0	41.215	382930000	20	25.925	25.4132	24.9812	25.8273	25.693	25.6281
	0.966126	0.197292	P36507	P36507	Dual specificity mitogen-activated protein kinase kinase 2	MAP2K2	Color2 [DarkGray]	1	4					15	9	9	41.8	31.2	31.2	44.424	0	31.745	254840000	25	25.2069	25.2734	25.2756	24.9899	25.238	24.9362
	1.27013	-0.393366	P36542	P36542	ATP synthase subunit gamma, mitochondrial	ATP5C1	Color2 [DarkGray]	1	4					9	9	9	31.2	31.2	31.2	32.996	0	33.046	770980000	41	26.3159	26.7923	26.5252	26.9655	26.9998	26.8482
	0.120529	0.0425021	P36543;Q96A05	P36543	V-type proton ATPase subunit E 1	ATP6V1E1	Color2 [DarkGray]	1	4					8	8	8	40.7	40.7	40.7	26.145	0	47.372	700860000	34	26.6759	26.4072	26.7498	26.5697	26.6987	26.437
	0.805235	-0.929797	P36551	P36551	Oxygen-dependent coproporphyrinogen-III oxidase, mitochondrial	CPOX	Color2 [DarkGray]	1	4					7	7	7	20.3	20.3	20.3	50.151	0	15.005	236750000	22	23.3391	24.9102	24.9605	25.3902	25.3584	25.2506
	0.537821	0.228033	P36639	P36639	7,8-dihydro-8-oxoguanine triphosphatase	NUDT1	Color2 [DarkGray]	1	4					4	4	4	26.4	26.4	26.4	22.519	0	18.748	233320000	14	25.0773	25.0305	25.2399	24.8367	24.6119	25.2151
	0.220358	-0.0783374	P36776	P36776	Lon protease homolog, mitochondrial	LONP1	Color2 [DarkGray]	1	4					22	22	22	30.1	30.1	30.1	106.49	0	95.083	947770000	65	26.824	27.0027	27.1167	26.9631	27.2776	26.9378
	1.20114	0.293248	P36871	P36871	Phosphoglucomutase-1	PGM1	Color2 [DarkGray]	1	4					20	20	20	43.8	43.8	43.8	61.448	0	65.266	997290000	75	27.2005	27.1786	27.4709	27.0452	26.859	27.066
	1.17427	-0.254886	P37108	P37108	Signal recognition particle 14 kDa protein	SRP14	Color2 [DarkGray]	1	4					5	5	5	40.4	40.4	40.4	14.57	0	38.603	1609800000	23	27.5961	27.7631	27.4583	27.8267	27.9619	27.7936
	0.311265	-0.433987	P37198	P37198	Nuclear pore glycoprotein p62	NUP62	Color2 [DarkGray]	1	4					5	5	5	14.6	14.6	14.6	53.254	0	17.348	121520000	15	24.3721	24.1207	22.7255	24.6522	24.0505	23.8175
	0.478433	-0.740164	P37235;P84074;P61601	P37235	Hippocalcin-like protein 1	HPCAL1	Color2 [DarkGray]	1	4					9	9	9	47.7	47.7	47.7	22.313	0	19.408	304010000	24	25.4643	25.3379	23.4249	25.7174	25.2852	25.445
	0.701948	-0.0896645	P37802;Q9UI15	P37802	Transgelin-2	TAGLN2	Color2 [DarkGray]	1	4					18	18	18	89.4	89.4	89.4	22.391	0	323.31	28196000000	121	31.9846	31.8138	31.8878	32.001	31.9256	32.0287
	1.06552	-0.299196	P37837	P37837	Transaldolase	TALDO1	Color2 [DarkGray]	1	4					21	21	21	50.7	50.7	50.7	37.54	0	93.455	13053000000	133	30.4689	30.7015	30.8348	30.9101	31.1207	30.872
	1.26289	-0.253898	P38117	P38117	Electron transfer flavoprotein subunit beta	ETFB	Color2 [DarkGray]	1	4					16	16	16	59.2	59.2	59.2	27.843	0	72.642	2770500000	94	28.3471	28.6124	28.3768	28.7427	28.7422	28.6131
	0.568557	0.124691	P38606	P38606	V-type proton ATPase catalytic subunit A	ATP6V1A	Color2 [DarkGray]	1	4					17	17	17	34	34	34	68.303	0	100.87	1174500000	59	27.4601	27.3496	27.4814	27.1936	27.4804	27.2431
	0.777417	-0.163181	P38646	P38646	Stress-70 protein, mitochondrial	HSPA9	Color2 [DarkGray]	1	4					40	39	39	58.9	58.9	58.9	73.68	0	323.31	18592000000	248	31.4221	31.1422	31.1585	31.375	31.4714	31.366
	0.87146	-0.253408	P38919	P38919	Eukaryotic initiation factor 4A-III;Eukaryotic initiation factor 4A-III, N-terminally processed	EIF4A3	Color2 [DarkGray]	1	4					15	11	11	36	29.9	29.9	46.871	0	47.585	695590000	39	26.2329	26.4486	26.6435	26.8162	26.5925	26.6765
	0.461894	0.151345	P39656	P39656	Dolichyl-diphosphooligosaccharide--protein glycosyltransferase 48 kDa subunit	DDOST	Color2 [DarkGray]	1	4					12	12	12	40.8	40.8	40.8	50.8	0	184.16	1974300000	59	28.2509	28.1792	28.1704	27.9189	28.3271	27.9005
	0.499767	-0.157509	P39748;CON__P01030;CON__ENSEMBL:ENSBTAP00000007350	P39748	Flap endonuclease 1	FEN1	Color2 [DarkGray]	1	4					10	10	10	36.3	36.3	36.3	42.592	0	120.25	1262600000	40	27.1354	27.3811	27.5402	27.5219	27.3805	27.6269
	0.156286	-0.0814991	P40121	P40121	Macrophage-capping protein	CAPG	Color2 [DarkGray]	1	4					7	7	7	27	27	27	38.498	0	25.971	348880000	26	25.4161	25.3349	25.9084	25.6865	25.7353	25.4821
	1.37016	0.503005	P40123	P40123	Adenylyl cyclase-associated protein 2	CAP2	Color2 [DarkGray]	1	4					8	7	7	25.4	23.7	23.7	52.823	0	29.196	410020000	27	26.3498	26.1628	25.8127	25.5272	25.7408	25.5483
	0.820114	-0.161402	P40261	P40261	Nicotinamide N-methyltransferase	NNMT	Color2 [DarkGray]	1	4					9	9	9	42	42	42	29.574	0	87.677	2278900000	43	28.2198	28.146	28.287	28.5166	28.3861	28.2343
	1.28924	0.362441	P40429;Q6NVV1	P40429	60S ribosomal protein L13a	RPL13A	Color2 [DarkGray]	1	4					13	13	13	46.3	46.3	46.3	23.577	0	40.837	5863600000	82	29.7576	29.7871	29.9927	29.548	29.2706	29.6316
	0.566685	0.314565	P40616	P40616	ADP-ribosylation factor-like protein 1	ARL1	Color2 [DarkGray]	1	4					5	5	5	37	37	37	20.417	0	43.83	596310000	25	26.5982	26.7879	26.0964	25.9673	26.4308	26.1408
	0.122484	-0.0266946	P40763	P40763	Signal transducer and activator of transcription 3	STAT3	Color2 [DarkGray]	1	4					25	25	25	44.7	44.7	44.7	88.067	0	185.56	2334700000	109	28.4375	28.3329	28.1768	28.3113	28.391	28.325
	0.391742	0.115229	P40925	P40925	Malate dehydrogenase, cytoplasmic	MDH1	Color2 [DarkGray]	1	4					15	15	15	47.6	47.6	47.6	36.426	0	170.37	9281100000	86	30.2804	30.3306	30.5658	30.3291	30.1062	30.3958
	0.838002	0.142731	P40926	P40926	Malate dehydrogenase, mitochondrial	MDH2	Color2 [DarkGray]	1	4					19	19	19	67.8	67.8	67.8	35.503	0	261.66	17701000000	148	31.4811	31.2924	31.2511	31.26	31.1382	31.1982
	0.367558	0.0400499	P40939	P40939	Trifunctional enzyme subunit alpha, mitochondrial;Long-chain enoyl-CoA hydratase;Long chain 3-hydroxyacyl-CoA dehydrogenase	HADHA	Color2 [DarkGray]	1	4					34	34	34	58.1	58.1	58.1	82.999	0	323.31	9438900000	163	30.3597	30.3921	30.4797	30.4186	30.3212	30.3716
	0.36824	-0.128616	P41091;Q2VIR3	P41091;Q2VIR3	Eukaryotic translation initiation factor 2 subunit 3;Putative eukaryotic translation initiation factor 2 subunit 3-like protein	EIF2S3;EIF2S3L	Color2 [DarkGray]	1	4					19	19	19	50	50	50	51.109	0	133.93	3774300000	103	28.7203	29.0108	29.1507	29.2337	29.0042	29.0299
	0.475758	0.221304	P41227;Q9BSU3	P41227	N-alpha-acetyltransferase 10	NAA10	Color2 [DarkGray]	1	4					12	12	12	48.5	48.5	48.5	26.458	0	35.473	656070000	43	26.6491	26.2724	26.9425	26.456	26.2883	26.4558
	1.80686	0.151738	P41250	P41250	Glycine--tRNA ligase	GARS	Color2 [DarkGray]	1	4					22	22	22	37.8	37.8	37.8	83.165	0	194.79	2760600000	101	28.6672	28.7264	28.6651	28.5952	28.5201	28.4881
	0.513489	-0.132028	P41252	P41252	Isoleucine--tRNA ligase, cytoplasmic	IARS	Color2 [DarkGray]	1	4					44	44	44	43.9	43.9	43.9	144.5	0	316.45	4219600000	177	29.2419	29.2031	28.9056	29.1939	29.3212	29.2315
	1.4423	-0.504452	P41567;O60739	P41567;O60739	Eukaryotic translation initiation factor 1;Eukaryotic translation initiation factor 1b	EIF1;EIF1B	Color2 [DarkGray]	1	4					8	8	8	81.4	81.4	81.4	12.732	0	81.802	1391000000	36	27.5896	27.3862	27.0661	27.7619	27.9565	27.8368
	0.118754	0.117045	P42126	P42126	Enoyl-CoA delta isomerase 1, mitochondrial	ECI1	Color2 [DarkGray]	1	4					7	7	7	28.8	28.8	28.8	32.816	0	72.778	669940000	29	26.7912	26.0337	26.894	26.5209	26.02	26.8269
	0.108548	-0.0332349	P42224	P42224	Signal transducer and activator of transcription 1-alpha/beta	STAT1	Color2 [DarkGray]	1	4					27	27	27	38.3	38.3	38.3	87.334	0	180.3	3071300000	142	28.756	28.6941	28.6602	28.7718	28.902	28.5362
	0.915846	-0.076973	P42330;P17516	P42330	Aldo-keto reductase family 1 member C3	AKR1C3	Color2 [DarkGray]	1	4					27	27	17	81.7	81.7	59.1	36.853	0	323.31	79692000000	322	33.3492	33.3912	33.4565	33.4452	33.4599	33.5227
	0.465842	0.0266418	P42704	P42704	Leucine-rich PPR motif-containing protein, mitochondrial	LRPPRC	Color2 [DarkGray]	1	4					79	79	78	64.9	64.9	64.4	157.9	0	323.31	14053000000	377	30.9732	30.9144	30.9604	30.9229	30.8929	30.9523
	0.456979	-0.15511	P42765	P42765	3-ketoacyl-CoA thiolase, mitochondrial	ACAA2	Color2 [DarkGray]	1	4					17	17	17	59.7	59.7	59.7	41.924	0	131.53	892170000	53	26.5992	26.9003	26.9998	26.989	27.132	26.8436
	0.784439	-0.268653	P43034	P43034	Platelet-activating factor acetylhydrolase IB subunit alpha	PAFAH1B1	Color2 [DarkGray]	1	4					24	24	24	65.4	65.4	65.4	46.637	0	130.32	1978600000	91	27.6475	28.0584	28.1299	28.1262	28.2945	28.221
	0.313293	-0.179852	P43243	P43243	Matrin-3	MATR3	Color2 [DarkGray]	1	4					15	15	15	26.1	26.1	26.1	94.622	0	52.725	679500000	49	26.0452	26.4939	26.6409	26.3631	26.8673	26.4892
	0.725563	-0.302304	P43246	P43246	DNA mismatch repair protein Msh2	MSH2	Color2 [DarkGray]	1	4					21	21	21	27.7	27.7	27.7	104.74	0	52.241	598750000	61	25.8199	26.2153	26.4173	26.3412	26.5951	26.4233
	0.587142	0.125345	P43304	P43304	Glycerol-3-phosphate dehydrogenase, mitochondrial	GPD2	Color2 [DarkGray]	1	4					21	21	21	30.3	30.3	30.3	80.852	0	68.983	837080000	67	26.8674	26.9532	26.9033	26.6129	26.929	26.806
	1.09115	1.0725	P43353	P43353	Aldehyde dehydrogenase family 3 member B1	ALDH3B1	Color2 [DarkGray]	1	4					5	4	4	13.2	10.7	10.7	51.839	0	11.233	59470000	11	23.6232	23.8012	23.6316	21.7282	22.8462	23.2641
	0.442739	0.208452	P43487;Q9C010	P43487	Ran-specific GTPase-activating protein	RANBP1	Color2 [DarkGray]	1	4					8	8	8	59.7	59.7	59.7	23.31	0	98.824	3506900000	50	29.2224	28.7562	29.0598	29.0577	28.8136	28.5417
	0.394599	0.0978769	P43490	P43490	Nicotinamide phosphoribosyltransferase	NAMPT	Color2 [DarkGray]	1	4					25	25	25	64.2	64.2	64.2	55.52	0	323.31	6335800000	143	29.7471	29.8706	30.0435	29.7532	29.7082	29.9061
	0.210869	0.0575225	P43686	P43686	26S protease regulatory subunit 6B	PSMC4	Color2 [DarkGray]	1	4					21	21	21	74.6	74.6	74.6	47.366	0	242.93	3382900000	96	29.0369	28.7464	29.0295	28.9702	28.8312	28.8388
	0.141763	0.0671291	P43897	P43897	Elongation factor Ts, mitochondrial	TSFM	Color2 [DarkGray]	1	4					9	9	9	40.9	40.9	40.9	35.39	0	56.782	477310000	36	26.0412	26.2844	25.9519	25.9654	26.3004	25.8103
	0.734687	0.760632	P45880	P45880	Voltage-dependent anion-selective channel protein 2	VDAC2	Color2 [DarkGray]	1	4					4	4	4	16	16	16	31.566	0	6.9221	87324000	12	24.5497	24.1362	23.375	23.5746	22.6062	23.5982
	1.18549	0.115465	P45974;Q92995	P45974	Ubiquitin carboxyl-terminal hydrolase 5	USP5	Color2 [DarkGray]	1	4					22	22	22	34.3	34.3	34.3	95.785	0	189.5	2650900000	94	28.6731	28.5592	28.5367	28.4627	28.509	28.4508
	0.483812	-1.44726	P46060	P46060	Ran GTPase-activating protein 1	RANGAP1	Color2 [DarkGray]	1	4					13	13	13	25.2	25.2	25.2	63.541	0	39.52	402050000	30	21.9412	25.6091	26.0206	26.0517	26.0952	25.7657
	0.223027	0.0695203	P46063	P46063	ATP-dependent DNA helicase Q1	RECQL	Color2 [DarkGray]	1	4					10	10	10	24.2	24.2	24.2	73.457	0	44.308	297510000	31	25.5671	25.32	25.3591	25.5197	25.3232	25.1947
	0.598475	-0.231785	P46109	P46109	Crk-like protein	CRKL	Color2 [DarkGray]	1	4					6	6	6	28.1	28.1	28.1	33.777	0	19.333	228290000	26	25.0647	24.8897	24.517	25.0119	25.1796	24.9753
	0.130046	0.0283457	P46379	P46379	Large proline-rich protein BAG6	BAG6	Color2 [DarkGray]	1	4					9	9	9	9.4	9.4	9.4	119.41	0	40.726	458510000	32	26.1005	25.8664	25.9694	25.9718	25.8681	26.0114
	0.7285	-0.276198	P46459	P46459	Vesicle-fusing ATPase	NSF	Color2 [DarkGray]	1	4					18	18	18	28.6	28.6	28.6	82.593	0	43.406	497140000	46	26.1784	25.6059	25.9957	26.2361	26.2502	26.1222
	0.118085	-0.0345402	P46734	P46734	Dual specificity mitogen-activated protein kinase kinase 3	MAP2K3	Color2 [DarkGray]	1	4					4	4	3	15.6	15.6	11	39.318	0	13.702	268010000	17	25.1851	25.227	24.9854	25.2012	25.2783	25.0217
	1.34264	0.39623	P46776	P46776	60S ribosomal protein L27a	RPL27A	Color2 [DarkGray]	1	4					8	8	8	38.5	38.5	38.5	16.561	0	53.353	4020600000	54	29.0706	29.4959	29.4008	28.8604	28.8954	29.0229
	1.88284	0.314717	P46777	P46777	60S ribosomal protein L5	RPL5	Color2 [DarkGray]	1	4					16	16	16	43.8	43.8	43.8	34.362	0	93.723	8818900000	114	30.3415	30.4016	30.4938	30.0809	30.2075	30.0044
	0.957861	0.529213	P46778	P46778	60S ribosomal protein L21	RPL21	Color2 [DarkGray]	1	4					8	8	8	43.8	43.8	43.8	18.565	0	47.441	5387000000	54	29.5048	29.8022	30.0415	29.5137	28.8449	29.4022
	1.49056	0.720332	P46779	P46779	60S ribosomal protein L28	RPL28	Color2 [DarkGray]	1	4					9	9	9	52.6	52.6	52.6	15.747	0	36.744	4643900000	38	29.9124	29.3877	29.6408	29.0279	28.6046	29.1475
	2.33891	0.336798	P46821;P78559	P46821	Microtubule-associated protein 1B;MAP1B heavy chain;MAP1 light chain LC1	MAP1B	Color2 [DarkGray]	1	4					75	75	75	47.3	47.3	47.3	270.63	0	323.31	13120000000	379	31.0777	30.9852	30.985	30.6279	30.7791	30.6304
	0.0687582	0.0230618	P46926	P46926	Glucosamine-6-phosphate isomerase 1	GNPDA1	Color2 [DarkGray]	1	4					11	11	9	58.1	58.1	47.4	32.668	0	91.941	1172800000	43	27.5513	27.2437	27.2901	27.2886	27.4723	27.255
	1.10021	0.154081	P46940;Q13576	P46940	Ras GTPase-activating-like protein IQGAP1	IQGAP1	Color2 [DarkGray]	1	4					84	84	82	56.7	56.7	55.7	189.25	0	323.31	16314000000	440	31.2902	31.2386	31.1466	31.0035	31.1704	31.0392
	0.663939	-0.558903	P46976	P46976	Glycogenin-1	GYG1	Color2 [DarkGray]	1	4					8	8	8	24.9	24.9	24.9	39.383	0	35.681	204290000	19	24.6677	23.745	24.9823	25.0098	24.8793	25.1827
	1.66437	0.170362	P46977	P46977	Dolichyl-diphosphooligosaccharide--protein glycosyltransferase subunit STT3A	STT3A	Color2 [DarkGray]	1	4					5	4	4	6	5	5	80.529	0	9.3571	186580000	19	24.7889	24.7097	24.7897	24.5874	24.6611	24.5287
	0.459131	0.140677	P47712	P47712	Cytosolic phospholipase A2;Phospholipase A2;Lysophospholipase	PLA2G4A	Color2 [DarkGray]	1	4					8	8	8	13.4	13.4	13.4	85.238	0	38.934	216620000	22	25.1932	24.7696	24.9015	24.8874	24.8155	24.7393
	0.0713042	0.0461458	P47755	P47755	F-actin-capping protein subunit alpha-2	CAPZA2	Color2 [DarkGray]	1	4					12	12	11	61.9	61.9	58.4	32.949	0	173.89	1964600000	65	28.5258	27.9594	27.8663	27.889	28.2048	28.1194
	0.105183	-0.0225487	P47756	P47756	F-actin-capping protein subunit beta	CAPZB	Color2 [DarkGray]	1	4					13	13	13	52	52	52	31.35	0	91.257	2518700000	78	28.554	28.3844	28.4522	28.4027	28.4541	28.6013
	0.110546	0.0409826	P47897	P47897	Glutamine--tRNA ligase	QARS	Color2 [DarkGray]	1	4					35	35	35	55.6	55.6	55.6	87.798	0	193.46	2274900000	146	28.5562	28.1508	28.2753	28.321	28.3691	28.1693
	0.137991	0.836969	P47914	P47914	60S ribosomal protein L29	RPL29	Color2 [DarkGray]	1	4					2	2	2	14.5	14.5	14.5	17.752	0	12.644	1848600000	14	28.6169	23.8441	28.9591	23.2737	27.7038	27.9317
	1.13104	0.538797	P48047	P48047	ATP synthase subunit O, mitochondrial	ATP5O	Color2 [DarkGray]	1	4					9	9	9	54	54	54	23.277	0	51.133	934350000	34	27.2111	27.3842	27.2671	27.0376	26.3211	26.8874
	0.347118	0.501633	P48059;Q7Z4I7	P48059	LIM and senescent cell antigen-like-containing domain protein 1	LIMS1	Color2 [DarkGray]	1	4					8	8	8	32	32	32	37.251	0	18.654	115990000	18	23.7184	24.6776	24.3807	24.4876	24.0526	22.7316
	1.36639	0.302876	P48147	P48147	Prolyl endopeptidase	PREP	Color2 [DarkGray]	1	4					17	17	17	31.3	31.3	31.3	80.699	0	99.737	532240000	44	26.3886	26.4399	26.1384	26.0766	26.0515	25.9301
	0.639543	0.0733096	P48163;Q16798	P48163	NADP-dependent malic enzyme	ME1	Color2 [DarkGray]	1	4					19	19	19	41.1	41.1	41.1	64.149	0	203.18	2824900000	90	28.7263	28.6258	28.6861	28.6359	28.6604	28.5219
	0.258428	-0.0427221	P48444	P48444	Coatomer subunit delta	ARCN1	Color2 [DarkGray]	1	4					24	24	24	50.9	50.9	50.9	57.21	0	133.52	2925700000	109	28.6943	28.6173	28.728	28.8318	28.6968	28.6392
	0.868248	-0.122079	P48506	P48506	Glutamate--cysteine ligase catalytic subunit	GCLC	Color2 [DarkGray]	1	4					17	17	17	31.7	31.7	31.7	72.765	0	83.935	1013200000	64	27.1418	27.0813	26.9699	27.1087	27.2519	27.1987
	0.721648	-0.296354	P48507	P48507	Glutamate--cysteine ligase regulatory subunit	GCLM	Color2 [DarkGray]	1	4					7	7	7	35	35	35	30.727	0	51.362	1359400000	47	27.5385	27.5262	26.9796	27.6151	27.717	27.6012
	0.124778	-0.0371507	P48556	P48556	26S proteasome non-ATPase regulatory subunit 8	PSMD8	Color2 [DarkGray]	1	4					9	9	9	29.4	29.4	29.4	39.611	0	38.408	1133900000	46	27.3648	27.2287	27.2385	27.1164	27.4344	27.3926
	0.0518898	0.0216948	P48637	P48637	Glutathione synthetase	GSS	Color2 [DarkGray]	1	4					15	15	15	38.8	38.8	38.8	52.384	0	46.355	863170000	45	26.8542	27.0461	26.7965	27.0391	26.6373	26.9554
	0.471244	0.466727	P48651	P48651	Phosphatidylserine synthase 1	PTDSS1	Color2 [DarkGray]	1	4					5	5	5	14	14	14	55.527	0	20.777	113230000	14	24.2996	23.9217	24.1605	23.6833	22.9312	24.3671
	0.10698	-0.0378723	P48729;Q8N752	P48729;Q8N752	Casein kinase I isoform alpha;Casein kinase I isoform alpha-like	CSNK1A1;CSNK1A1L	Color2 [DarkGray]	1	4					6	6	6	19	19	19	38.914	0	11.348	150950000	15	24.2757	24.4828	24.179	24.3299	24.5174	24.2039
	0.633741	-0.202008	P48735	P48735	Isocitrate dehydrogenase [NADP], mitochondrial	IDH2	Color2 [DarkGray]	1	4					16	15	15	40.5	38.5	38.5	50.909	0	66.059	916970000	56	26.9817	26.6122	26.8536	26.8818	27.1991	26.9727
	1.69048	0.507843	P48739	P48739	Phosphatidylinositol transfer protein beta isoform	PITPNB	Color2 [DarkGray]	1	4					12	10	10	53.9	47.6	47.6	31.54	0	35.138	561090000	40	26.2985	26.7275	26.5809	26.0452	25.9297	26.1086
	0.0101217	-0.0111815	P49005	P49005	DNA polymerase delta subunit 2	POLD2	Color2 [DarkGray]	1	4					7	7	7	21.1	21.1	21.1	51.289	0	40.963	199860000	25	24.387	25.0448	24.8544	25.2337	24.1911	24.8949
	0.0571691	0.0278912	P49023	P49023	Paxillin	PXN	Color2 [DarkGray]	1	4					10	10	10	26.2	26.2	26.2	64.505	0	29.856	423530000	40	25.7176	25.7412	26.2044	25.9095	25.7449	25.9253
	0.151733	-0.0580158	P49189	P49189	4-trimethylaminobutyraldehyde dehydrogenase	ALDH9A1	Color2 [DarkGray]	1	4					13	13	13	28.7	28.7	28.7	53.801	0	59.185	922580000	52	27.0167	27.0557	26.9031	27.0537	27.282	26.8138
	0.5133	1.96172	P49207	P49207	60S ribosomal protein L34	RPL34	Color2 [DarkGray]	1	4					5	5	5	29.1	29.1	29.1	13.293	0	12.205	2037900000	17	28.3	28.2362	28.7196	28.121	28.1303	23.1194
	0.548202	-0.176867	P49257	P49257	Protein ERGIC-53	LMAN1	Color2 [DarkGray]	1	4					11	11	11	30.2	30.2	30.2	57.548	0	52.294	1168000000	56	27.0423	27.4446	27.2504	27.4386	27.5576	27.2717
	0.665008	-0.146544	P49321	P49321	Nuclear autoantigenic sperm protein	NASP	Color2 [DarkGray]	1	4					14	14	14	22	22	22	85.237	0	84.51	1726100000	67	27.7016	27.7822	27.9814	28.0784	27.9235	27.9029
	2.30826	-0.245272	P49327	P49327	Fatty acid synthase;[Acyl-carrier-protein] S-acetyltransferase;[Acyl-carrier-protein] S-malonyltransferase;3-oxoacyl-[acyl-carrier-protein] synthase;3-oxoacyl-[acyl-carrier-protein] reductase;3-hydroxyacyl-[acyl-carrier-protein] dehydratase;Enoyl-[acyl-carrier-protein] reductase;Oleoyl-[acyl-carrier-protein] hydrolase	FASN	Color2 [DarkGray]	1	4					114	114	114	60.1	60.1	60.1	273.42	0	323.31	51553000000	696	32.7446	32.6341	32.6552	32.9165	32.9738	32.8793
	0.194903	-0.469777	P49354	P49354	Protein farnesyltransferase/geranylgeranyltransferase type-1 subunit alpha	FNTA	Color2 [DarkGray]	1	4					6	6	6	16.1	16.1	16.1	44.408	0	11.277	179930000	18	25.1372	25.012	22.3283	24.472	24.5267	24.8881
	1.24521	-0.272898	P49368	P49368	T-complex protein 1 subunit gamma	CCT3	Color2 [DarkGray]	1	4					32	32	32	60.6	60.6	60.6	60.533	0	233.96	11357000000	161	30.615	30.4579	30.2765	30.6668	30.7777	30.7236
	0.449086	0.170007	P49411	P49411	Elongation factor Tu, mitochondrial	TUFM	Color2 [DarkGray]	1	4					28	28	28	63.9	63.9	63.9	49.541	0	323.31	12247000000	164	30.8016	30.7063	31.0053	30.6839	30.4228	30.8964
	0.580533	0.126467	P49419	P49419	Alpha-aminoadipic semialdehyde dehydrogenase	ALDH7A1	Color2 [DarkGray]	1	4					21	21	21	49.4	49.4	49.4	58.486	0	118.7	1526000000	87	27.9549	27.748	27.7136	27.6717	27.7886	27.5768
	0.417824	-0.299817	P49458	P49458	Signal recognition particle 9 kDa protein	SRP9	Color2 [DarkGray]	1	4					4	4	4	43	43	43	10.112	0	17.996	652760000	15	26.6934	26.5137	25.7651	26.4323	26.8208	26.6185
	2.14941	-0.208131	P49588	P49588	Alanine--tRNA ligase, cytoplasmic	AARS	Color2 [DarkGray]	1	4					40	40	40	53	53	53	106.81	0	323.31	6766300000	238	29.8306	29.7148	29.7351	29.9664	30.0041	29.9344
	0.176722	-0.16455	P49589	P49589	Cysteine--tRNA ligase, cytoplasmic	CARS	Color2 [DarkGray]	1	4					16	16	16	26.3	26.3	26.3	85.472	0	37.004	341590000	37	25.1032	25.3527	25.7879	25.2538	26.1604	25.3234
	1.39864	-0.185925	P49591	P49591	Serine--tRNA ligase, cytoplasmic	SARS	Color2 [DarkGray]	1	4					16	16	16	36.6	36.6	36.6	58.777	0	85.857	1316800000	77	27.5158	27.3745	27.3335	27.6184	27.5377	27.6254
	0.452401	-0.0896848	P49720	P49720	Proteasome subunit beta type-3	PSMB3	Color2 [DarkGray]	1	4					8	8	8	46.8	46.8	46.8	22.949	0	85.177	2378000000	48	28.4421	28.2038	28.3644	28.4947	28.4525	28.3321
	1.06885	-0.326572	P49721	P49721	Proteasome subunit beta type-2	PSMB2	Color2 [DarkGray]	1	4					12	12	12	45.8	45.8	45.8	22.836	0	37.905	1742900000	48	27.5114	27.9563	27.7367	27.9503	28.1728	28.0611
	1.68937	-0.38695	P49736	P49736	DNA replication licensing factor MCM2	MCM2	Color2 [DarkGray]	1	4					26	26	26	37.7	37.7	37.7	101.89	0	147.53	1162500000	90	27.1289	27.0613	27.1071	27.3306	27.6783	27.4492
	1.03812	0.287464	P49748	P49748	Very long-chain specific acyl-CoA dehydrogenase, mitochondrial	ACADVL	Color2 [DarkGray]	1	4					23	23	23	47	47	47	70.389	0	161.43	1831000000	87	28.3505	28.0568	28.0144	27.7015	27.9266	27.9311
	1.28524	-0.174643	P49755	P49755	Transmembrane emp24 domain-containing protein 10	TMED10	Color2 [DarkGray]	1	4					8	8	8	38.8	38.8	38.8	24.976	0	92.986	2182700000	42	28.1659	28.1452	28.0924	28.334	28.1954	28.3982
	0.489233	-0.179838	P49773	P49773	Histidine triad nucleotide-binding protein 1	HINT1	Color2 [DarkGray]	1	4					10	10	10	84.9	84.9	84.9	13.802	0	147.65	7120000000	66	29.591	29.9421	30.1246	30.0903	29.9997	30.1072
	0.577805	-0.41383	P49840	P49840	Glycogen synthase kinase-3 alpha	GSK3A	Color2 [DarkGray]	1	4					2	2	2	5	5	5	50.98	0	7.3593	79204000	12	23.1071	22.7688	23.6718	23.8759	23.2601	23.6532
	0.0945983	0.0174014	P49902	P49902	Cytosolic purine 5-nucleotidase	NT5C2	Color2 [DarkGray]	1	4					16	16	16	41.2	41.2	41.2	64.969	0	82.367	1181000000	62	27.5266	27.3372	27.3695	27.3737	27.3547	27.4526
	0.640444	0.998829	P49903	P49903	Selenide, water dikinase 1	SEPHS1	Color2 [DarkGray]	1	4					4	4	4	17.3	17.3	17.3	42.91	0	21.697	204880000	14	25.466	24.6727	25.3118	24.8118	24.8121	22.8302
	1.38022	-0.135482	P49915	P49915	GMP synthase [glutamine-hydrolyzing]	GMPS	Color2 [DarkGray]	1	4					19	19	19	38.1	38.1	38.1	76.715	0	124.81	1988500000	84	27.9528	28.0626	28.0681	28.113	28.2012	28.1758
	0.325682	0.112733	P50213	P50213	Isocitrate dehydrogenase [NAD] subunit alpha, mitochondrial	IDH3A	Color2 [DarkGray]	1	4					14	14	14	43.7	43.7	43.7	39.591	0	107.85	1887800000	78	28.1389	28.321	27.8344	27.9811	27.9721	28.003
	0.632972	-2.38721	P50238	P50238	Cysteine-rich protein 1	CRIP1	Color2 [DarkGray]	1	4					3	3	3	55.8	55.8	55.8	8.5328	0	12.538	2222200000	17	22.8653	27.9443	27.9546	28.6791	28.8433	28.4034
	1.26804	0.188611	P50395	P50395	Rab GDP dissociation inhibitor beta	GDI2	Color2 [DarkGray]	1	4					33	33	25	71	71	53.7	50.663	0	323.31	12517000000	192	30.962	30.8107	30.8166	30.7385	30.7072	30.5778
	0.148467	0.0496476	P50402	P50402	Emerin	EMD	Color2 [DarkGray]	1	4					7	7	7	33.5	33.5	33.5	28.994	0	27.069	442790000	35	25.77	25.9235	26.1944	25.8927	25.9291	25.9171
	0.148143	-0.0557817	P50453;O75830	P50453	Serpin B9	SERPINB9	Color2 [DarkGray]	1	4					17	17	15	52.7	52.7	46.8	42.403	0	65.696	1192100000	64	27.3393	27.5863	27.1431	27.4499	27.4855	27.3008
	0.908717	-0.250962	P50454	P50454	Serpin H1	SERPINH1	Color2 [DarkGray]	1	4					20	20	20	51.9	51.9	51.9	46.44	0	220.76	4397000000	114	29.247	29.1098	28.9285	29.2295	29.5232	29.2854
	1.31835	-0.162295	P50502;Q8NFI4;Q8IZP2	P50502;Q8NFI4;Q8IZP2	Hsc70-interacting protein;Putative protein FAM10A5;Putative protein FAM10A4	ST13;ST13P5;ST13P4	Color2 [DarkGray]	1	4					10	10	10	29.8	29.8	29.8	41.331	0	69.347	3609800000	75	28.8527	28.911	28.8163	29.1046	29.0322	28.9301
	0.0946569	0.0272853	P50552	P50552	Vasodilator-stimulated phosphoprotein	VASP	Color2 [DarkGray]	1	4					12	12	12	39.2	39.2	39.2	39.829	0	57.619	888820000	56	27.0953	26.8472	26.949	27.032	26.986	26.7917
	0.296793	0.442547	P50570	P50570	Dynamin-2	DNM2	Color2 [DarkGray]	1	4					11	5	4	13.8	7.6	5.4	98.063	0	15.272	107970000	10	24.5816	24.2147	23.0873	23.9315	23.9148	22.7097
	0.578584	0.201364	P50579	P50579	Methionine aminopeptidase 2	METAP2	Color2 [DarkGray]	1	4					12	12	12	34.7	34.7	34.7	52.891	0	85.498	952900000	52	26.976	27.0812	27.4533	27.0717	26.9534	26.8812
	1.71296	0.387543	P50914	P50914	60S ribosomal protein L14	RPL14	Color2 [DarkGray]	1	4					6	6	6	27.9	27.9	27.9	23.432	0	22.467	5426000000	45	29.643	29.7994	29.8505	29.3564	29.5265	29.2474
	2.49823	-0.231697	P50991	P50991	T-complex protein 1 subunit delta	CCT4	Color2 [DarkGray]	1	4					30	30	30	53.6	53.6	53.6	57.924	0	323.31	9906600000	166	30.3495	30.2844	30.2635	30.5817	30.5128	30.498
	1.32636	-0.235704	P50995	P50995	Annexin A11	ANXA11	Color2 [DarkGray]	1	4					18	18	17	37.8	37.8	36	54.389	0	97.714	2890200000	81	28.5085	28.4986	28.6834	28.8249	28.8835	28.6891
	0.235009	-0.0122178	P51114	P51114	Fragile X mental retardation syndrome-related protein 1	FXR1	Color2 [DarkGray]	1	4					13	13	11	31.2	31.2	28.7	69.72	0	64.23	715550000	58	26.58	26.6436	26.628	26.6353	26.6378	26.6151
	0.169518	-0.0326341	P51148;P61020	P51148	Ras-related protein Rab-5C	RAB5C	Color2 [DarkGray]	1	4					8	8	5	53.2	53.2	38.4	23.482	0	88.709	1996100000	47	28.0692	28.1347	28.1205	28.1148	28.0347	28.2728
	0.643665	0.482521	P51151;Q9NP90	P51151	Ras-related protein Rab-9A	RAB9A	Color2 [DarkGray]	1	4					5	5	5	33.3	33.3	33.3	22.837	0	17.522	119650000	17	23.7645	24.6369	24.5726	23.6492	23.6568	24.2204
	0.726153	0.320293	P51398	P51398	28S ribosomal protein S29, mitochondrial	DAP3	Color2 [DarkGray]	1	4					8	8	8	27.6	27.6	27.6	45.566	0	25.139	329150000	27	26.0839	25.4768	25.5748	25.531	25.2829	25.3607
	0.968223	0.291265	P51452	P51452	Dual specificity protein phosphatase 3	DUSP3	Color2 [DarkGray]	1	4					6	6	6	43.8	43.8	43.8	20.478	0	53.216	543890000	30	26.4491	26.2166	26.5576	26.2538	25.925	26.1707
	0.0770482	-0.00901222	P51553	P51553	Isocitrate dehydrogenase [NAD] subunit gamma, mitochondrial	IDH3G	Color2 [DarkGray]	1	4					9	9	9	36.9	36.9	36.9	42.794	0	29.879	367010000	32	25.6089	25.6679	25.662	25.5913	25.6563	25.7182
	0.529288	0.198448	P51570	P51570	Galactokinase	GALK1	Color2 [DarkGray]	1	4					10	10	10	36.2	36.2	36.2	42.272	0	66.188	828290000	44	27.149	26.9463	26.6199	26.7603	26.771	26.5885
	0.132043	-0.0347481	P51571	P51571	Translocon-associated protein subunit delta	SSR4	Color2 [DarkGray]	1	4					4	4	4	30.6	30.6	30.6	18.998	0	31.865	910630000	27	26.9257	26.8875	27.1213	26.9749	27.1383	26.9256
	0.191026	0.10803	P51572	P51572	B-cell receptor-associated protein 31	BCAP31	Color2 [DarkGray]	1	4					10	10	10	32.5	32.5	32.5	27.991	0	45.658	2505200000	47	28.5134	28.2091	28.8312	28.4885	28.1722	28.569
	0.15709	-0.0597712	P51659	P51659	Peroxisomal multifunctional enzyme type 2;(3R)-hydroxyacyl-CoA dehydrogenase;Enoyl-CoA hydratase 2	HSD17B4	Color2 [DarkGray]	1	4					17	17	17	32.3	32.3	32.3	79.685	0	101.16	989030000	63	26.8559	27.2218	27.13	26.9994	27.3038	27.0837
	0.572423	0.140073	P51665	P51665	26S proteasome non-ATPase regulatory subunit 7	PSMD7	Color2 [DarkGray]	1	4					11	11	11	46.9	46.9	46.9	37.025	0	137	2991100000	74	28.959	28.6746	28.7275	28.7354	28.6852	28.5201
	1.64903	-0.535289	P51812;Q15349;Q9UK32	P51812	Ribosomal protein S6 kinase alpha-3	RPS6KA3	Color2 [DarkGray]	1	4					20	20	15	31.8	31.8	24.6	83.735	0	65	797540000	62	26.3929	26.6513	26.2429	26.7956	27.0902	27.0071
	0.980948	-0.174185	P51858;Q9Y3E1	P51858	Hepatoma-derived growth factor	HDGF	Color2 [DarkGray]	1	4					13	13	12	65	65	61.7	26.788	0	85.549	3332500000	62	28.7677	28.6921	28.7734	28.7637	29.0232	28.9687
	0.932672	-0.521964	P51991	P51991	Heterogeneous nuclear ribonucleoprotein A3	HNRNPA3	Color2 [DarkGray]	1	4					11	11	11	30.2	30.2	30.2	39.594	0	72.944	1158400000	43	27.1707	27.2626	26.4527	27.4795	27.393	27.5793
	2.97575	-0.288942	P52209	P52209	6-phosphogluconate dehydrogenase, decarboxylating	PGD	Color2 [DarkGray]	1	4					30	30	30	66	66	66	53.139	0	323.31	51171000000	285	32.6407	32.6743	32.5939	32.901	32.8998	32.9749
	2.19607	-0.355519	P52292	P52292	Importin subunit alpha-1	KPNA2	Color2 [DarkGray]	1	4					18	18	18	52.6	52.6	52.6	57.861	0	301.46	3751300000	99	28.917	28.8377	28.7608	29.1322	29.1551	29.2947
	0.257991	0.0718931	P52306	P52306	Rap1 GTPase-GDP dissociation stimulator 1	RAP1GDS1	Color2 [DarkGray]	1	4					9	9	9	17.3	17.3	17.3	66.316	0	34.6	247310000	31	25.1154	25.2353	25.1716	25.2788	24.9145	25.1133
	0.0227104	0.00495148	P52565	P52565	Rho GDP-dissociation inhibitor 1	ARHGDIA	Color2 [DarkGray]	1	4					9	9	9	54.9	54.9	54.9	23.207	0	123.46	5528100000	74	29.4441	29.6289	29.6809	29.6033	29.5678	29.568
	0.624768	-0.244129	P52594	P52594	Arf-GAP domain and FG repeat-containing protein 1	AGFG1	Color2 [DarkGray]	1	4					6	6	6	18.9	18.9	18.9	58.259	0	75.817	618450000	31	26.1827	26.5287	26.0645	26.5406	26.6667	26.301
	0.0847904	0.0251586	P52597	P52597	Heterogeneous nuclear ribonucleoprotein F;Heterogeneous nuclear ribonucleoprotein F, N-terminally processed	HNRNPF	Color2 [DarkGray]	1	4					14	14	12	54.5	54.5	48	45.671	0	296.36	4935400000	92	29.3995	29.4828	29.6201	29.5953	29.3157	29.5159
	0.396997	0.182671	P52701	P52701	DNA mismatch repair protein Msh6	MSH6	Color2 [DarkGray]	1	4					26	26	26	24.9	24.9	24.9	152.78	0	80.505	743670000	68	26.8717	26.6351	26.6241	26.7411	26.6653	26.1764
	0.763377	0.19611	P52788	P52788	Spermine synthase	SMS	Color2 [DarkGray]	1	4					14	14	14	52.5	52.5	52.5	41.268	0	174.99	1644700000	52	28.1903	27.7863	27.9714	27.8155	27.7917	27.7524
	0.383064	-0.254019	P52815	P52815	39S ribosomal protein L12, mitochondrial	MRPL12	Color2 [DarkGray]	1	4					4	4	4	18.2	18.2	18.2	21.348	0	14.116	632700000	20	25.9561	26.6722	26.2253	26.2326	26.8714	26.5117
	0.806157	-0.329056	P52888	P52888	Thimet oligopeptidase	THOP1	Color2 [DarkGray]	1	4					13	13	13	20.9	20.9	20.9	78.839	0	29.544	234110000	33	24.8911	24.5434	25.018	25.2377	25.3018	24.9003
	0.567249	0.291735	P52907	P52907	F-actin-capping protein subunit alpha-1	CAPZA1	Color2 [DarkGray]	1	4					11	10	10	58.7	55.2	55.2	32.922	0	105.65	1627100000	53	28.3784	27.7219	27.8078	27.7669	27.7861	27.48
	0.82962	0.209893	P53004	P53004	Biliverdin reductase A	BLVRA	Color2 [DarkGray]	1	4					12	12	12	40.9	40.9	40.9	33.428	0	74.927	1103600000	48	27.5497	27.4451	27.184	27.1015	27.1952	27.2525
	0.740455	-0.585346	P53041	P53041	Serine/threonine-protein phosphatase 5	PPP5C	Color2 [DarkGray]	1	4					15	15	15	35.1	35.1	35.1	56.878	0	47.899	499640000	47	26.1207	26.0201	25.0722	26.0664	26.349	26.5536
	0.231904	-0.488668	P53367	P53367	Arfaptin-1	ARFIP1	Color2 [DarkGray]	1	4					6	6	6	25.2	25.2	25.2	41.738	0	38.366	253630000	21	25.5584	25.3181	22.9773	24.9552	25.1691	25.1956
	0.240204	0.0307299	P53396	P53396	ATP-citrate synthase	ACLY	Color2 [DarkGray]	1	4					63	63	63	61.7	61.7	61.7	120.84	0	323.31	48382000000	459	32.8089	32.6465	32.7763	32.7274	32.7157	32.6963
	0.0227012	-0.0521329	P53582	P53582	Methionine aminopeptidase 1	METAP1	Color2 [DarkGray]	1	4					10	10	10	36.8	36.8	36.8	43.215	0	59.209	212110000	16	23.8013	24.9828	24.7898	25.5819	24.8523	23.2961
	0.0587923	-0.0496419	P53597	P53597	Succinyl-CoA ligase [ADP/GDP-forming] subunit alpha, mitochondrial	SUCLG1	Color2 [DarkGray]	1	4					7	7	7	24.3	24.3	24.3	36.249	0	26.118	902800000	47	26.9362	26.6613	27.2711	27.1454	26.5507	27.3213
	0.0105143	-0.00243251	P53618	P53618	Coatomer subunit beta	COPB1	Color2 [DarkGray]	1	4					31	31	31	41.3	41.3	41.3	107.14	0	242.91	3242400000	131	28.9527	28.7611	28.7144	28.8299	28.8382	28.7675
	0.36246	-0.0640354	P53621	P53621	Coatomer subunit alpha;Xenin;Proxenin	COPA	Color2 [DarkGray]	1	4					48	48	48	47.6	47.6	47.6	138.34	0	296.02	5034500000	237	29.5281	29.3846	29.3008	29.4836	29.515	29.4069
	0.846117	0.32391	P53680	P53680	AP-2 complex subunit sigma	AP2S1	Color2 [DarkGray]	1	4					6	6	6	33.8	33.8	33.8	17.018	0	13.555	307370000	20	25.2867	25.7427	25.6028	25.2498	25.0064	25.4042
	0.457474	-0.290724	P53990	P53990	IST1 homolog	IST1	Color2 [DarkGray]	1	4					8	8	8	30.5	30.5	30.5	39.75	0	15.903	185500000	21	24.3374	24.4168	24.747	24.8103	24.3596	25.2035
	0.197207	-0.0920499	P53992	P53992	Protein transport protein Sec24C	SEC24C	Color2 [DarkGray]	1	4					17	17	17	21.2	21.2	21.2	118.32	0	59.745	523660000	52	26.252	25.7479	26.2176	26.301	26.1542	26.0384
	0.973448	-0.12603	P53999	P53999	Activated RNA polymerase II transcriptional coactivator p15	SUB1	Color2 [DarkGray]	1	4					5	5	5	29.1	29.1	29.1	14.395	0	28.545	1088100000	28	27.2938	27.1047	27.1934	27.2979	27.296	27.3761
	0.226768	-0.0448284	P54136	P54136	Arginine--tRNA ligase, cytoplasmic	RARS	Color2 [DarkGray]	1	4					36	36	36	60.5	60.5	60.5	75.378	0	174.99	4612300000	177	29.3929	29.2584	29.22	29.3812	29.4024	29.2222
	0.755431	-0.294678	P54577	P54577	Tyrosine--tRNA ligase, cytoplasmic;Tyrosine--tRNA ligase, cytoplasmic, N-terminally processed	YARS	Color2 [DarkGray]	1	4					29	29	29	52.5	52.5	52.5	59.143	0	112.69	1433100000	102	27.1059	27.6163	27.6598	27.7441	27.7225	27.7994
	0.0837987	0.0209579	P54578	P54578	Ubiquitin carboxyl-terminal hydrolase 14	USP14	Color2 [DarkGray]	1	4					19	19	19	50.6	50.6	50.6	56.068	0	128.16	1428400000	73	27.7229	27.4704	27.7392	27.605	27.6087	27.656
	1.17199	-0.652339	P54652	P54652	Heat shock-related 70 kDa protein 2	HSPA2	Color2 [DarkGray]	1	4					28	14	13	42.7	25.8	24.6	70.02	0	64.482	735080000	52	26.264	26.4697	25.8692	26.5327	27.2014	26.8259
	0.676803	-0.593701	P54709	P54709	Sodium/potassium-transporting ATPase subunit beta-3	ATP1B3	Color2 [DarkGray]	1	4					3	3	3	13.3	13.3	13.3	31.512	0	8.0805	123910000	14	24.1073	24.2022	23.0339	24.6252	24.3405	24.1587
	0.431339	-0.106372	P54727	P54727	UV excision repair protein RAD23 homolog B	RAD23B	Color2 [DarkGray]	1	4					14	14	12	45.2	45.2	43.3	43.171	0	148.35	3008700000	80	28.6083	28.5797	28.8028	28.8139	28.6168	28.8792
	0.0212621	0.00767517	P54819	P54819	Adenylate kinase 2, mitochondrial;Adenylate kinase 2, mitochondrial, N-terminally processed	AK2	Color2 [DarkGray]	1	4					12	12	12	74.1	74.1	74.1	26.477	0	107.7	1557700000	64	27.8485	27.8991	27.5366	27.7001	27.8332	27.728
	1.27923	-0.240931	P54886	P54886	Delta-1-pyrroline-5-carboxylate synthase;Glutamate 5-kinase;Gamma-glutamyl phosphate reductase	ALDH18A1	Color2 [DarkGray]	1	4					25	25	25	39	39	39	87.301	0	104.45	1594200000	102	27.5785	27.513	27.7687	27.9475	27.8052	27.8303
	0.23667	0.0541306	P54920;Q9H115	P54920	Alpha-soluble NSF attachment protein	NAPA	Color2 [DarkGray]	1	4					14	14	14	68.8	68.8	68.8	33.232	0	150.66	1190100000	61	27.3458	27.2934	27.5237	27.4213	27.2269	27.3523
	0.532332	-0.180226	P55036;A2A3N6	P55036	26S proteasome non-ATPase regulatory subunit 4	PSMD4	Color2 [DarkGray]	1	4					9	9	9	32.9	32.9	32.9	40.736	0	89.692	1478000000	47	27.3629	27.6711	27.6581	27.864	27.8444	27.5243
	0.703523	-0.181815	P55060	P55060	Exportin-2	CSE1L	Color2 [DarkGray]	1	4					35	35	35	42.2	42.2	42.2	110.42	0	263.54	5826900000	195	29.6164	29.6931	29.3369	29.6389	29.7607	29.7923
	0.258267	0.0676765	P55072	P55072	Transitional endoplasmic reticulum ATPase	VCP	Color2 [DarkGray]	1	4					51	51	51	69.4	69.4	69.4	89.321	0	323.31	34145000000	360	32.4344	32.1217	32.2391	32.1356	32.2977	32.159
	0.494789	-0.136866	P55084	P55084	Trifunctional enzyme subunit beta, mitochondrial;3-ketoacyl-CoA thiolase	HADHB	Color2 [DarkGray]	1	4					25	25	25	61.6	61.6	61.6	51.294	0	170.55	5194800000	138	29.2358	29.4851	29.5	29.4993	29.7081	29.4241
	1.97866	0.349574	P55209	P55209	Nucleosome assembly protein 1-like 1	NAP1L1	Color2 [DarkGray]	1	4					12	12	10	38.1	38.1	35.5	45.374	0	289.08	13996000000	99	31.2288	31.0373	31.0728	30.8391	30.7814	30.6697
	0.600144	-0.466285	P55212	P55212	Caspase-6;Caspase-6 subunit p18;Caspase-6 subunit p11	CASP6	Color2 [DarkGray]	1	4					4	4	4	17.4	17.4	17.4	33.31	0	9.5295	87551000	12	23.6153	23.4967	22.5267	23.6368	23.7705	23.6302
	0.00553155	-0.00513395	P55263	P55263	Adenosine kinase	ADK	Color2 [DarkGray]	1	4					8	8	8	20.2	20.2	20.2	40.545	0	21.819	254960000	22	25.0543	25.292	24.7729	25.0936	25.477	24.5641
	0.6139	0.14828	P55327	P55327	Tumor protein D52	TPD52	Color2 [DarkGray]	1	4					10	10	10	58	58	58	24.327	0	94.815	1101400000	49	27.5093	27.3731	27.1449	27.2335	27.1891	27.1599
	0.777834	0.173351	P55735	P55735	Protein SEC13 homolog	SEC13	Color2 [DarkGray]	1	4					10	10	10	59	59	59	35.54	0	141.74	1562600000	39	28.0214	27.7307	27.8073	27.7344	27.5704	27.7345
	1.12247	-0.893884	P55769	P55769	NHP2-like protein 1;NHP2-like protein 1, N-terminally processed	NHP2L1	Color2 [DarkGray]	1	4					2	2	2	18.8	18.8	18.8	14.173	0	8.8716	120250000	11	23.6574	22.769	23.8832	24.108	24.6333	24.2499
	2.11146	0.200848	P55786;A6NEC2	P55786	Puromycin-sensitive aminopeptidase	NPEPPS	Color2 [DarkGray]	1	4					37	37	37	47.9	47.9	47.9	103.28	0	278.36	6395200000	200	29.8632	29.9928	29.9208	29.7001	29.7532	29.721
	0.665699	0.200085	P55884	P55884	Eukaryotic translation initiation factor 3 subunit B	EIF3B	Color2 [DarkGray]	1	4					33	33	33	45.5	45.5	45.5	92.48	0	169.48	3553500000	152	28.8854	29.0489	29.2154	28.8831	28.9995	28.6669
	0.415151	1.33656	P55957	P55957	BH3-interacting domain death agonist;BH3-interacting domain death agonist p15;BH3-interacting domain death agonist p13;BH3-interacting domain death agonist p11	BID	Color2 [DarkGray]	1	4					5	5	5	42.1	42.1	42.1	21.994	0	59.548	614250000	16	26.1587	26.6675	26.7095	26.4002	26.663	22.4629
	0.368352	-1.1112	P56134	P56134	ATP synthase subunit f, mitochondrial	ATP5J2	Color2 [DarkGray]	1	4					3	3	3	39.4	39.4	39.4	10.918	0	13.612	774660000	13	23.0731	26.9353	26.7545	26.6196	26.8815	26.5955
	0.227644	0.10459	P56192	P56192	Methionine--tRNA ligase, cytoplasmic	MARS	Color2 [DarkGray]	1	4					23	23	23	34.7	34.7	34.7	101.11	0	171.41	1848300000	85	28.307	27.9285	27.9149	27.9503	28.1611	27.7253
	0.654476	-1.08819	P56211	P56211	cAMP-regulated phosphoprotein 19	ARPP19	Color2 [DarkGray]	1	4					4	4	3	46.4	46.4	36.6	12.323	0	8.9231	275660000	14	24.7051	22.8798	25.3968	25.453	25.473	25.3203
	0.779491	0.310797	P56537	P56537	Eukaryotic translation initiation factor 6	EIF6	Color2 [DarkGray]	1	4					7	7	7	46.9	46.9	46.9	26.599	0	87.841	1392600000	43	27.5708	27.768	27.8878	27.6775	27.4825	27.1342
	0.635786	0.275835	P56545	P56545	C-terminal-binding protein 2	CTBP2	Color2 [DarkGray]	1	4					8	8	6	23.8	23.8	19.6	48.944	0	27.403	305620000	26	25.6789	25.668	25.2365	25.196	25.5008	25.0591
	0.630596	0.252796	P57088	P57088	Transmembrane protein 33	TMEM33	Color2 [DarkGray]	1	4					6	6	6	25.5	25.5	25.5	27.978	0	22.512	548970000	28	26.7243	26.4137	26.1221	26.1207	26.2646	26.1164
	0.143031	0.25571	P57678	P57678	Gem-associated protein 4	GEMIN4	Color2 [DarkGray]	1	4					13	13	13	15.5	15.5	15.5	120.04	0	34.736	133710000	17	23.7476	24.2753	24.7841	24.3625	24.818	22.8594
	0.0312962	-0.0170453	P58546	P58546	Myotrophin	MTPN	Color2 [DarkGray]	1	4					6	6	6	62.7	62.7	62.7	12.895	0	30.906	880200000	20	26.8346	27.1378	26.7822	27.015	26.6516	27.1392
	0.0606119	-0.0297769	P59998	P59998	Actin-related protein 2/3 complex subunit 4	ARPC4	Color2 [DarkGray]	1	4					8	8	8	54.8	54.8	54.8	19.667	0	56.915	954010000	30	27.229	26.9689	26.8427	26.8764	27.2922	26.9613
	0.0772385	-0.257483	P60033	P60033	CD81 antigen	CD81	Color2 [DarkGray]	1	4					2	2	2	15.3	15.3	15.3	25.809	0	29.125	198230000	11	25.2398	25.1367	22.2858	25.1288	25.1546	23.1513
	0.973588	-0.0504545	P60174	P60174	Triosephosphate isomerase	TPI1	Color2 [DarkGray]	1	4					18	18	18	73.1	73.1	73.1	30.791	0	310.21	59617000000	197	33.0097	32.9697	33.0291	33.0591	33.0217	33.079
	0.347303	-0.113283	P60228	P60228	Eukaryotic translation initiation factor 3 subunit E	EIF3E	Color2 [DarkGray]	1	4					17	17	17	41.8	41.8	41.8	52.22	0	69.589	1823200000	66	27.919	27.7156	28.0372	27.9743	28.1854	27.852
	0.630782	-0.440976	P60510	P60510	Serine/threonine-protein phosphatase 4 catalytic subunit	PPP4C	Color2 [DarkGray]	1	4					9	7	7	44	39.1	39.1	35.08	0	38.484	322890000	18	25.4678	24.4561	25.3013	25.555	25.4509	25.5422
	0.0790358	0.0262591	P60660	P60660	Myosin light polypeptide 6	MYL6	Color2 [DarkGray]	1	4					9	9	7	60.3	60.3	44.4	16.93	0	118.72	12096000000	63	30.9552	30.59	30.6266	30.6812	30.7283	30.6836
	0.682697	-0.124028	P60842	P60842	Eukaryotic initiation factor 4A-I	EIF4A1	Color2 [DarkGray]	1	4					30	30	16	70.4	70.4	41.9	46.153	0	323.31	31262000000	246	31.888	32.0816	32.0962	32.2387	32.1224	32.0768
	1.68532	-0.439472	P60891	P60891	Ribose-phosphate pyrophosphokinase 1	PRPS1	Color2 [DarkGray]	1	4					17	17	5	60.4	60.4	20.4	34.834	0	76.537	2654600000	80	28.1265	28.3341	28.3691	28.5968	28.8949	28.6565
	2.11532	-0.315515	P60900	P60900	Proteasome subunit alpha type-6	PSMA6	Color2 [DarkGray]	1	4					13	13	13	70.7	70.7	70.7	27.399	0	104.93	4374700000	84	29.1233	29.0717	29.0436	29.2821	29.4814	29.4217
	1.49511	0.521914	P60903	P60903	Protein S100-A10	S100A10	Color2 [DarkGray]	1	4					3	3	3	45.4	45.4	45.4	11.203	0	58.922	4705400000	55	29.8416	29.3409	29.6163	29.1589	29.1396	28.9346
	0.417203	0.219465	P60953	P60953	Cell division control protein 42 homolog	CDC42	Color2 [DarkGray]	1	4					6	5	5	38.2	32.5	32.5	21.258	0	45.821	2481700000	38	28.5429	28.3915	28.6815	28.5795	27.9086	28.4694
	0.750566	-0.158658	P60981	P60981	Destrin	DSTN	Color2 [DarkGray]	1	4					12	11	11	78.8	74.5	74.5	18.506	0	105.3	7706600000	77	30.0041	29.9783	30.0173	30.1784	29.9825	30.3147
	0.891745	0.771285	P60983;O60234	P60983;O60234	Glia maturation factor beta;Glia maturation factor gamma	GMFB;GMFG	Color2 [DarkGray]	1	4					4	4	4	49.3	49.3	49.3	16.713	0	45.867	380920000	15	26.1453	26.1056	26.01	24.5432	25.5142	25.8897
	0.51752	0.210435	P61011	P61011	Signal recognition particle 54 kDa protein	SRP54	Color2 [DarkGray]	1	4					19	19	19	47	47	47	55.704	0	128.49	924100000	61	27.438	26.9085	26.9542	26.866	26.9968	26.8066
	0.187728	-0.0965563	P61019	P61019	Ras-related protein Rab-2A	RAB2A	Color2 [DarkGray]	1	4					14	14	7	70.8	70.8	34.9	23.545	0	115.99	2152900000	85	28.3098	28.3477	27.8241	28.0558	28.3756	28.3399
	0.332137	0.0962067	P61026;P59190	P61026	Ras-related protein Rab-10	RAB10	Color2 [DarkGray]	1	4					12	12	10	59.5	59.5	50.5	22.541	0	58.331	5376800000	66	29.5352	29.5778	29.7239	29.5554	29.3181	29.6747
	0.759701	0.16093	P61081	P61081	NEDD8-conjugating enzyme Ubc12	UBE2M	Color2 [DarkGray]	1	4					9	9	9	49.2	49.2	49.2	20.9	0	41.937	703890000	27	26.8403	26.7208	26.6409	26.6815	26.4209	26.6167
	1.19655	-0.545579	P61086	P61086	Ubiquitin-conjugating enzyme E2 K	UBE2K	Color2 [DarkGray]	1	4					8	8	8	40	40	40	22.406	0	24.307	410220000	25	25.2827	25.4595	25.6922	25.8264	26.3801	25.8647
	0.34491	0.102669	P61088;Q5JXB2	P61088;Q5JXB2	Ubiquitin-conjugating enzyme E2 N;Putative ubiquitin-conjugating enzyme E2 N-like	UBE2N;UBE2NL	Color2 [DarkGray]	1	4					10	10	10	63.8	63.8	63.8	17.138	0	44.88	2145400000	52	28.4563	28.145	28.2618	28.2232	28.0252	28.3067
	0.198969	0.0825685	P61106	P61106	Ras-related protein Rab-14	RAB14	Color2 [DarkGray]	1	4					12	12	12	61.9	61.9	61.9	23.897	0	45.88	1086000000	58	27.159	27.3766	27.1891	27.1687	27.4043	26.904
	0.33404	-0.0518475	P61158;Q9P1U1;Q9C0K3	P61158	Actin-related protein 3	ACTR3	Color2 [DarkGray]	1	4					22	22	22	65.6	65.6	65.6	47.371	0	205.3	3634700000	113	28.8279	28.9611	28.974	29.0366	28.9929	28.889
	0.759045	-0.204623	P61160	P61160	Actin-related protein 2	ACTR2	Color2 [DarkGray]	1	4					14	14	14	40.1	40.1	40.1	44.76	0	117.65	2416600000	79	28.388	28.2716	28.1825	28.553	28.6305	28.2724
	0.28607	-0.138769	P61163	P61163	Alpha-centractin	ACTR1A	Color2 [DarkGray]	1	4					9	9	4	38	38	20.5	42.613	0	84.985	1702500000	44	27.4805	27.877	28.1222	27.879	28.0756	27.9414
	0.11452	-0.0578696	P61201	P61201	COP9 signalosome complex subunit 2	COPS2	Color2 [DarkGray]	1	4					12	12	12	28.4	28.4	28.4	51.596	0	39.643	505320000	57	26.2551	26.223	25.7449	25.9779	26.1707	26.248
	0.135148	0.0542094	P84077;P61204	P84077;P61204	ADP-ribosylation factor 1;ADP-ribosylation factor 3	ARF1;ARF3	Color2 [DarkGray]	1	4					10	10	5	45.9	45.9	22.1	20.697	0	239.37	8169400000	85	30.2741	30.3459	29.955	29.9788	30.1579	30.2757
	0.496268	-0.144424	P61221	P61221	ATP-binding cassette sub-family E member 1	ABCE1	Color2 [DarkGray]	1	4					21	21	21	40.6	40.6	40.6	67.314	0	127.21	1528500000	81	27.4622	27.8996	27.6408	27.8163	27.809	27.8105
	0.16267	-0.0361703	P61224;A6NIZ1	P61224;A6NIZ1	Ras-related protein Rap-1b;Ras-related protein Rap-1b-like protein	RAP1B	Color2 [DarkGray]	1	4					10	10	3	48.9	48.9	19	20.825	0	60.113	970800000	44	26.9293	27.1268	27.0604	26.9612	27.0979	27.1659
	0.757301	0.507913	P61254	P61254	60S ribosomal protein L26	RPL26	Color2 [DarkGray]	1	4					9	9	1	40	40	6.2	17.258	0	58.375	3537900000	49	29.0183	29.055	29.5543	28.9037	28.1941	29.0062
	1.10226	-0.190439	P61289	P61289	Proteasome activator complex subunit 3	PSME3	Color2 [DarkGray]	1	4					12	12	12	49.6	49.6	49.6	29.506	0	78.422	1718000000	70	27.7083	27.9099	27.7035	27.9084	27.9324	28.0521
	0.293891	0.0624911	P61326;Q96A72	P61326;Q96A72	Protein mago nashi homolog;Protein mago nashi homolog 2	MAGOH;MAGOHB	Color2 [DarkGray]	1	4					7	7	7	54.8	54.8	54.8	17.163	0	17.097	263870000	27	25.3848	25.1106	25.3104	25.188	25.1716	25.2587
	0.94525	0.425582	P61353	P61353	60S ribosomal protein L27	RPL27	Color2 [DarkGray]	1	4					8	8	8	49.3	49.3	49.3	15.798	0	79.326	4972200000	66	29.2547	29.8022	29.8965	29.2029	29.3493	29.1244
	0.954023	-0.217185	P61457;Q9H0N5	P61457	Pterin-4-alpha-carbinolamine dehydratase	PCBD1	Color2 [DarkGray]	1	4					8	8	8	64.4	64.4	64.4	11.999	0	39.137	2038100000	43	27.899	28.1549	28.1175	28.169	28.2455	28.4084
	1.58906	0.567074	P61513;A6NKH3	P61513	60S ribosomal protein L37a	RPL37A	Color2 [DarkGray]	1	4					5	5	5	52.2	52.2	52.2	10.275	0	46.208	2125500000	33	28.3761	28.5023	28.6583	28.0446	27.6651	28.1258
	1.32766	-0.196966	P61604	P61604	10 kDa heat shock protein, mitochondrial	HSPE1	Color2 [DarkGray]	1	4					11	11	11	75.5	75.5	75.5	10.932	0	44.694	13411000000	92	30.658	30.7902	30.785	30.9695	30.8363	31.0182
	0.15128	0.0899734	P61619;Q9H9S3	P61619;Q9H9S3	Protein transport protein Sec61 subunit alpha isoform 1;Protein transport protein Sec61 subunit alpha isoform 2	SEC61A1;SEC61A2	Color2 [DarkGray]	1	4					7	7	7	13.9	13.9	13.9	52.264	0	23.899	464780000	32	26.1979	25.6946	26.3032	26.0898	25.739	26.097
	0.285533	0.183619	P61803	P61803	Dolichyl-diphosphooligosaccharide--protein glycosyltransferase subunit DAD1	DAD1	Color2 [DarkGray]	1	4					3	3	3	28.3	28.3	28.3	12.497	0	17.915	457150000	15	26.4648	26.1577	25.6142	25.9443	25.9914	25.7501
	0.445698	-0.118135	P61916	P61916	Epididymal secretory protein E1	NPC2	Color2 [DarkGray]	1	4					3	3	3	19.9	19.9	19.9	16.57	0	6.6713	94073000	14	23.6785	23.4924	23.8644	23.772	23.8713	23.7464
	0.344705	0.233313	P61923	P61923	Coatomer subunit zeta-1	COPZ1	Color2 [DarkGray]	1	4					4	4	4	24.9	24.9	24.9	20.198	0	51.877	655200000	16	26.8673	26.2265	26.7871	26.2171	26.7829	26.1808
	0.608865	-0.496854	P61956;Q6EEV6;P55854	P61956	Small ubiquitin-related modifier 2	SUMO2	Color2 [DarkGray]	1	4					3	3	3	27.4	27.4	27.4	10.871	0	16.593	989830000	20	26.8376	26.3475	27.1588	27.1645	26.8604	27.8095
	0.136791	-0.329044	P61960	P61960	Ubiquitin-fold modifier 1	UFM1	Color2 [DarkGray]	1	4					3	3	3	68.2	68.2	68.2	9.1175	0	41.3	319850000	13	25.9188	23.1972	25.7855	25.2759	25.416	25.1967
	1.23943	0.366211	P61970	P61970	Nuclear transport factor 2	NUTF2	Color2 [DarkGray]	1	4					6	6	6	74.8	74.8	74.8	14.478	0	144.4	3721500000	37	29.3894	29.0168	29.1094	28.9139	28.8581	28.6451
	1.09684	0.203105	P61978	P61978	Heterogeneous nuclear ribonucleoprotein K	HNRNPK	Color2 [DarkGray]	1	4					23	23	23	60.3	60.3	60.3	50.976	0	252.29	13525000000	184	30.8478	31.0167	31.1085	30.8018	30.8524	30.7095
	0.144343	0.0490437	P61981	P61981	14-3-3 protein gamma;14-3-3 protein gamma, N-terminally processed	YWHAG	Color2 [DarkGray]	1	4					17	13	12	76.9	64	60.3	28.302	0	179.6	7831800000	57	30.1413	30.0552	30.2697	30.0184	29.9764	30.3243
	1.27285	-0.433436	P62081	P62081	40S ribosomal protein S7	RPS7	Color2 [DarkGray]	1	4					13	13	13	68.6	68.6	68.6	22.127	0	214.35	8657300000	78	29.9158	30.0022	30.1339	30.455	30.1947	30.7026
	0.502134	-0.0762755	P62136	P62136	Serine/threonine-protein phosphatase PP1-alpha catalytic subunit	PPP1CA	Color2 [DarkGray]	1	4					18	18	6	63	63	24.5	37.512	0	190.3	2991000000	91	28.7222	28.6715	28.5744	28.7191	28.8253	28.6525
	0.600435	-0.335879	P62140	P62140	Serine/threonine-protein phosphatase PP1-beta catalytic subunit	PPP1CB	Color2 [DarkGray]	1	4					16	5	5	60.9	26.3	26.3	37.186	0	48.991	598880000	18	25.6721	26.3167	26.4353	26.4078	26.638	26.3861
	0.209128	-0.063666	P62158;P27482;P02585	P62158	Calmodulin	CALM1	Color2 [DarkGray]	1	4					13	13	13	67.8	67.8	67.8	16.837	0	226.27	21902000000	83	31.7229	31.3465	31.5367	31.5609	31.546	31.6902
	1.24368	-0.0623398	P62191	P62191	26S protease regulatory subunit 4	PSMC1	Color2 [DarkGray]	1	4					18	18	18	51.1	51.1	51.1	49.184	0	160.42	2583300000	74	28.4432	28.4946	28.4618	28.5575	28.5339	28.4953
	1.26831	0.14083	P62195;Q8NB90	P62195	26S protease regulatory subunit 8	PSMC5	Color2 [DarkGray]	1	4					23	23	23	61.8	61.8	61.8	45.626	0	214.05	4484900000	126	29.4256	29.3249	29.2606	29.2259	29.1575	29.2052
	1.52572	0.283541	P62258	P62258	14-3-3 protein epsilon	YWHAE	Color2 [DarkGray]	1	4					28	28	25	78.4	78.4	75.3	29.174	0	323.31	43252000000	246	32.6743	32.6883	32.7113	32.4701	32.2394	32.5138
	0.133634	0.303013	P62306	P62306	Small nuclear ribonucleoprotein F	SNRPF	Color2 [DarkGray]	1	4					2	2	2	24.4	24.4	24.4	9.7251	0	13.417	300580000	10	24.8487	25.3024	25.5293	25.662	25.8054	23.304
	0.0452142	0.0598513	P62314	P62314	Small nuclear ribonucleoprotein Sm D1	SNRPD1	Color2 [DarkGray]	1	4					4	4	4	54.6	54.6	54.6	13.281	0	23.974	485620000	19	26.8762	25.3525	25.9335	25.9075	26.1677	25.9075
	0.530671	-0.930848	P62316	P62316	Small nuclear ribonucleoprotein Sm D2	SNRPD2	Color2 [DarkGray]	1	4					5	5	5	44.1	44.1	44.1	13.527	0	17.546	563930000	17	25.9783	26.6098	24.0438	26.4817	26.5266	26.4161
	0.125989	0.0358842	P62318	P62318	Small nuclear ribonucleoprotein Sm D3	SNRPD3	Color2 [DarkGray]	1	4					5	5	5	53.2	53.2	53.2	13.916	0	55.711	1553300000	34	27.8051	27.8008	27.6572	27.6449	27.9019	27.6087
	0.0848841	-0.11743	P62328	P62328	Thymosin beta-4;Hematopoietic system regulatory peptide	TMSB4X	Color2 [DarkGray]	1	4					8	8	7	88.6	88.6	88.6	5.0526	0	119.19	21731000000	102	31.3997	31.3135	31.6572	31.9367	30.6245	32.1614
	0.0173333	0.014864	P62330	P62330	ADP-ribosylation factor 6	ARF6	Color2 [DarkGray]	1	4					5	5	5	44.6	44.6	44.6	20.082	0	26.343	487710000	23	26.5206	26.0732	25.6541	25.9138	26.339	25.9505
	0.441594	-0.0612214	P62333	P62333	26S protease regulatory subunit 10B	PSMC6	Color2 [DarkGray]	1	4					21	21	21	65	65	65	44.172	0	165.55	3550900000	91	28.9546	28.9846	28.8877	28.9107	29.0912	29.0085
	1.57287	0.631816	P62424	P62424	60S ribosomal protein L7a	RPL7A	Color2 [DarkGray]	1	4					21	21	21	54.5	54.5	54.5	29.995	0	153.15	8870700000	127	30.4249	30.5102	30.8391	30.0333	29.6983	30.1472
	0.117847	-0.0124156	P62495	P62495	Eukaryotic peptide chain release factor subunit 1	ETF1	Color2 [DarkGray]	1	4					16	16	16	37.3	37.3	37.3	49.03	0	113.11	2214500000	79	28.2998	28.2364	28.223	28.2439	28.2275	28.3251
	1.03008	-0.559668	P62633	P62633	Cellular nucleic acid-binding protein	CNBP	Color2 [DarkGray]	1	4					7	7	7	47.5	47.5	47.5	19.463	0	52.243	856010000	34	26.55	26.4807	26.8455	27.3122	26.74	27.5032
	1.17392	0.387571	P62750	P62750	60S ribosomal protein L23a	RPL23A	Color2 [DarkGray]	1	4					9	9	9	44.2	44.2	44.2	17.695	0	34.71	3974600000	61	29.2153	29.3114	29.4742	28.9549	28.7068	29.1763
	0.875184	-0.365454	P62805	P62805	Histone H4	HIST1H4A	Color2 [DarkGray]	1	4					7	7	7	52.4	52.4	52.4	11.367	0	24.81	1121000000	30	26.6958	27.0555	27.3583	27.434	27.3351	27.4369
	0.500317	0.152627	P62820	P62820	Ras-related protein Rab-1A	RAB1A	Color2 [DarkGray]	1	4					11	10	6	65.4	60	35.1	22.677	0	105.74	4321100000	59	29.4913	29.312	29.1304	29.0507	29.3221	29.1031
	0.512664	-0.128832	P62826	P62826	GTP-binding nuclear protein Ran	RAN	Color2 [DarkGray]	1	4					13	13	13	51.9	51.9	51.9	24.423	0	96.507	15260000000	106	30.8458	31.1371	30.9589	31.1319	30.9779	31.2184
	1.26492	0.762068	P62829	P62829	60S ribosomal protein L23	RPL23	Color2 [DarkGray]	1	4					6	6	6	45.7	45.7	45.7	14.865	0	52.768	5963700000	59	30.245	29.6981	30.2313	29.6099	28.8772	29.4012
	0.0917585	-0.199937	P62841	P62841	40S ribosomal protein S15	RPS15	Color2 [DarkGray]	1	4					4	4	4	36.6	36.6	36.6	17.04	0	63.602	1586400000	20	27.5198	27.5717	27.5149	26.201	28.7096	28.2956
	1.1628	-0.851667	P62861	P62861	40S ribosomal protein S30	FAU	Color2 [DarkGray]	1	4					2	2	2	18.6	18.6	18.6	6.6478	0	7.9865	596690000	17	25.7394	26.2172	25.5398	27.006	26.1266	26.9187
	0.280981	0.109086	P62873	P62873	Guanine nucleotide-binding protein G(I)/G(S)/G(T) subunit beta-1	GNB1	Color2 [DarkGray]	1	4					10	5	5	39.1	20.9	20.9	37.377	0	99.444	794900000	26	26.7744	26.5604	27.0762	26.6944	26.6165	26.7728
	0.78737	0.143854	P62879;Q9BRK4	P62879	Guanine nucleotide-binding protein G(I)/G(S)/G(T) subunit beta-2	GNB2	Color2 [DarkGray]	1	4					12	12	3	35.6	35.6	9.4	37.331	0	101.4	2375300000	58	28.564	28.5005	28.3107	28.3362	28.3638	28.2437
	0.531206	-1.51207	Q59GN2;P62891	Q59GN2;P62891	Putative 60S ribosomal protein L39-like 5;60S ribosomal protein L39	RPL39P5;RPL39	Color2 [DarkGray]	1	4					3	3	3	23.5	23.5	23.5	6.3225	0	7.1185	926950000	14	26.8698	26.8476	23.118	27.1354	27.3463	26.8899
	1.23667	0.48823	P62899	P62899	60S ribosomal protein L31	RPL31	Color2 [DarkGray]	1	4					7	7	7	52	52	52	14.463	0	27.376	3266700000	39	28.9538	29.1024	29.2334	28.7003	28.2844	28.8402
	3.23728	0.240723	P62906	P62906	60S ribosomal protein L10a	RPL10A	Color2 [DarkGray]	1	4					13	13	13	50.2	50.2	50.2	24.831	0	85.921	5249000000	98	29.6873	29.6634	29.6357	29.4104	29.3951	29.4586
	1.64825	0.586368	P62913	P62913	60S ribosomal protein L11	RPL11	Color2 [DarkGray]	1	4					8	8	8	40.4	40.4	40.4	20.252	0	52.386	3522100000	49	29.2782	29.1772	29.2091	28.8079	28.3165	28.781
	1.18213	0.533456	P62917	P62917	60S ribosomal protein L8	RPL8	Color2 [DarkGray]	1	4					16	16	16	52.1	52.1	52.1	28.024	0	234.23	7095500000	86	30.237	30.1334	30.396	29.8963	29.327	29.9427
	0.389815	-0.189964	P62937;P0DN26;A0A0B4J2A2;A0A075B759;Q9Y536;F5H284;P0DN37	P62937	Peptidyl-prolyl cis-trans isomerase A;Peptidyl-prolyl cis-trans isomerase A, N-terminally processed	PPIA	Color2 [DarkGray]	1	4					14	14	14	75.8	75.8	75.8	18.012	0	246.5	52923000000	153	32.9654	32.8252	32.3166	32.8555	33.0063	32.8154
	0.245038	-0.0585639	P62942	P62942	Peptidyl-prolyl cis-trans isomerase FKBP1A	FKBP1A	Color2 [DarkGray]	1	4					8	8	8	73.1	73.1	73.1	11.951	0	88.494	5613500000	71	29.4358	29.7378	29.5615	29.6504	29.6904	29.5701
	1.25099	-0.425753	P62979;P62987;P0CG47;P0CG48	P62979;P62987;P0CG47;P0CG48	Ubiquitin-40S ribosomal protein S27a;Ubiquitin;40S ribosomal protein S27a;Ubiquitin-60S ribosomal protein L40;Ubiquitin;60S ribosomal protein L40;Polyubiquitin-B;Ubiquitin;Polyubiquitin-C;Ubiquitin	RPS27A;UBA52;UBB;UBC	Color2 [DarkGray]	1	4					8	8	8	50.6	50.6	50.6	17.965	0	54.633	10174000000	74	30.0363	30.1713	30.4038	30.5537	30.8616	30.4733
	1.30124	-0.422634	P62993	P62993	Growth factor receptor-bound protein 2	GRB2	Color2 [DarkGray]	1	4					9	9	9	44.2	44.2	44.2	25.206	0	34.085	488780000	46	25.6717	25.9146	25.9688	26.1814	26.5156	26.1259
	0.0124117	0.00775655	P63000;P60763;P15153	P63000;P60763;P15153	Ras-related C3 botulinum toxin substrate 1;Ras-related C3 botulinum toxin substrate 3;Ras-related C3 botulinum toxin substrate 2	RAC1;RAC3;RAC2	Color2 [DarkGray]	1	4					9	9	8	50	50	44.3	21.45	0	37.711	2162300000	65	28.0961	28.0796	28.5585	28.3468	27.9702	28.394
	0.433727	0.0782197	P63010	P63010	AP-2 complex subunit beta	AP2B1	Color2 [DarkGray]	1	4					31	31	17	39.1	39.1	23.7	104.55	0	178.42	3951900000	138	28.993	29.1228	29.0605	28.9609	29.1061	28.8747
	0.332421	-0.0840098	P63092;Q5JWF2;P38405	P63092;Q5JWF2	Guanine nucleotide-binding protein G(s) subunit alpha isoforms short;Guanine nucleotide-binding protein G(s) subunit alpha isoforms XLas	GNAS	Color2 [DarkGray]	1	4					12	11	11	36	33.2	33.2	45.664	0	57.561	739680000	49	26.4643	26.7314	26.6532	26.5822	26.8162	26.7027
	0.463392	0.25643	P63104	P63104	14-3-3 protein zeta/delta	YWHAZ	Color2 [DarkGray]	1	4					21	16	15	75.9	64.9	62	27.745	0	199.85	26250000000	94	31.953	31.709	32.2031	31.8223	31.322	31.9515
	0.644777	-0.109372	P63151;Q66LE6;Q00005;Q9Y2T4	P63151	Serine/threonine-protein phosphatase 2A 55 kDa regulatory subunit B alpha isoform	PPP2R2A	Color2 [DarkGray]	1	4					12	12	12	35.1	35.1	35.1	51.691	0	103.13	1086800000	53	27.3591	27.1078	27.1954	27.337	27.3628	27.2906
	0.0520113	-0.0462996	P63167	P63167	Dynein light chain 1, cytoplasmic	DYNLL1	Color2 [DarkGray]	1	4					3	3	2	50.6	50.6	38.2	10.366	0	51.512	1409700000	26	27.3168	27.4641	27.9337	27.9545	27.1454	27.7537
	0.640145	0.357583	P63173	P63173	60S ribosomal protein L38	RPL38	Color2 [DarkGray]	1	4					5	5	5	50	50	50	8.2178	0	28.123	3813300000	55	29.3898	29.4301	28.8682	28.5214	29.0651	29.0288
	1.31554	-0.274338	P63208	P63208	S-phase kinase-associated protein 1	SKP1	Color2 [DarkGray]	1	4					6	6	6	35.6	35.6	35.6	18.658	0	43.904	1212200000	27	27.3099	27.1026	27.3243	27.5128	27.6383	27.4087
	1.2708	0.101245	P63241;Q6IS14;Q9GZV4	P63241;Q6IS14;Q9GZV4	Eukaryotic translation initiation factor 5A-1;Eukaryotic translation initiation factor 5A-1-like;Eukaryotic translation initiation factor 5A-2	EIF5A;EIF5AL1;EIF5A2	Color2 [DarkGray]	1	4					17	17	17	88.3	88.3	88.3	16.832	0	323.31	21030000000	154	31.5662	31.6129	31.5451	31.4128	31.4889	31.5188
	0.139296	0.0372683	P63261	P63261	Actin, cytoplasmic 2;Actin, cytoplasmic 2, N-terminally processed	ACTG1	Color2 [DarkGray]	1	4					29	29	1	87.2	87.2	4.5	41.792	0	323.31	641000000000	802	36.5789	36.3279	36.4314	36.3475	36.3363	36.5427
	0.689417	-0.275338	P63279	P63279	SUMO-conjugating enzyme UBC9	UBE2I	Color2 [DarkGray]	1	4					6	6	6	56.3	56.3	56.3	18.007	0	30.861	818110000	31	26.6902	26.3441	26.7913	26.9972	27.013	26.6414
	0.262386	0.212484	P63313;CON__P21752	P63313	Thymosin beta-10	TMSB10	Color2 [DarkGray]	1	4					5	4	4	63.6	63.6	63.6	5.0256	0	25.853	8916700000	34	30.7874	30.0255	30.18	30.3388	29.6703	30.3464
	0.354529	0.107587	P67775	P67775	Serine/threonine-protein phosphatase 2A catalytic subunit alpha isoform	PPP2CA	Color2 [DarkGray]	1	4					15	15	2	63.8	63.8	6.8	35.594	0	197.36	2650600000	73	28.7766	28.4951	28.5951	28.4252	28.7058	28.413
	0.158042	-0.0546646	P67809;Q9Y2T7	P67809	Nuclease-sensitive element-binding protein 1	YBX1	Color2 [DarkGray]	1	4					13	13	7	50	50	37.3	35.924	0	230.23	4171000000	88	28.9338	29.1977	29.3423	29.278	29.2456	29.1142
	0.808393	0.212525	P67812	P67812	Signal peptidase complex catalytic subunit SEC11A	SEC11A	Color2 [DarkGray]	1	4					4	4	4	20.7	20.7	20.7	20.625	0	15.582	316810000	17	25.6573	25.4143	25.598	25.5287	25.3038	25.1994
	0.00407778	0.000981013	P67870	P67870	Casein kinase II subunit beta	CSNK2B	Color2 [DarkGray]	1	4					8	8	8	49.3	49.3	49.3	24.942	0	34.062	566320000	33	26.3822	26.1844	26.238	26.3632	26.2543	26.1842
	0.544956	0.294533	P67936;Q2TAC2	P67936	Tropomyosin alpha-4 chain	TPM4	Color2 [DarkGray]	1	4					29	29	15	70.6	70.6	50.8	28.521	0	323.31	23876000000	214	31.8508	31.7038	32.011	31.6705	31.1334	31.8779
	0.187233	0.167199	P68133;P68032;P63267;P62736	P68133;P68032;P63267;P62736	Actin, alpha skeletal muscle;Actin, alpha cardiac muscle 1;Actin, gamma-enteric smooth muscle;Actin, aortic smooth muscle	ACTA1;ACTC1;ACTG2;ACTA2	Color2 [DarkGray]	1	4					17	3	3	36.1	9.8	9.8	42.051	0	45.424	48343000000	44	33.1934	32.7951	32.2524	32.1854	32.8746	32.6792
	0.632236	0.228003	P68036	P68036	Ubiquitin-conjugating enzyme E2 L3	UBE2L3	Color2 [DarkGray]	1	4					7	7	7	48.7	48.7	48.7	17.861	0	80.919	2266000000	41	28.5585	28.1148	28.5776	28.2733	28.0739	28.2196
	1.75204	0.435945	P68104;Q5VTE0	P68104;Q5VTE0	Elongation factor 1-alpha 1;Putative elongation factor 1-alpha-like 3	EEF1A1;EEF1A1P5	Color2 [DarkGray]	1	4					31	31	17	76.2	76.2	43.9	50.14	0	323.31	122130000000	514	34.275	34.1326	34.3329	33.8355	33.6355	33.9617
	0.552294	0.0867538	P68363;Q9H853	P68363	Tubulin alpha-1B chain	TUBA1B	Color2 [DarkGray]	1	4					34	34	0	78.3	78.3	0	50.151	0	323.31	151880000000	454	34.422	34.4487	34.3674	34.2925	34.2333	34.452
	0.849797	-0.201904	P68366	P68366	Tubulin alpha-4A chain	TUBA4A	Color2 [DarkGray]	1	4					30	5	5	69.2	19.2	19.2	49.924	0	147.23	4560200000	30	29.2239	29.1951	28.924	29.2061	29.3791	29.3635
	0.0407859	0.00803248	P68371	P68371	Tubulin beta-4B chain	TUBB4B	Color2 [DarkGray]	1	4					27	27	1	74.8	74.8	2.7	49.83	0	323.31	117550000000	517	34.0857	33.8932	33.879	33.9318	33.9544	33.9477
	0.692619	0.130311	P68400;Q8NEV1	P68400;Q8NEV1	Casein kinase II subunit alpha;Casein kinase II subunit alpha 3	CSNK2A1;CSNK2A3	Color2 [DarkGray]	1	4					14	14	14	44.5	44.5	44.5	45.143	0	124.25	1589900000	75	27.9933	27.8533	27.7472	27.8154	27.6506	27.7369
	1.7601	0.347565	P68402	P68402	Platelet-activating factor acetylhydrolase IB subunit beta	PAFAH1B2	Color2 [DarkGray]	1	4					4	4	4	37.6	37.6	37.6	25.569	0	71.261	998780000	18	27.3438	27.354	27.1207	26.9647	26.9773	26.8339
	0.220649	0.470923	Q15155;P69849;Q5JPE7	Q15155;P69849;Q5JPE7	Nodal modulator 1;Nodal modulator 3;Nodal modulator 2	NOMO1;NOMO3;NOMO2	Color2 [DarkGray]	1	4					8	8	8	7.5	7.5	7.5	134.32	0	22.493	147710000	18	23.7025	24.6157	24.5205	24.2816	24.8595	22.2848
	0.553484	-0.243575	P78318	P78318	Immunoglobulin-binding protein 1	IGBP1	Color2 [DarkGray]	1	4					6	6	6	29.2	29.2	29.2	39.221	0	25.569	222090000	22	24.822	24.691	24.6885	25.1979	25.1349	24.5994
	1.08737	0.175864	P78344	P78344	Eukaryotic translation initiation factor 4 gamma 2	EIF4G2	Color2 [DarkGray]	1	4					33	33	33	42.3	42.3	42.3	102.36	0	133.25	2256700000	125	28.3301	28.3873	28.4159	28.2282	28.3109	28.0666
	1.44808	-0.651564	P78347;Q86UP8;Q6EKJ0	P78347	General transcription factor II-I	GTF2I	Color2 [DarkGray]	1	4					17	17	17	19.8	19.8	19.8	112.42	0	61.634	367590000	36	25.3972	24.872	25.4174	26.0123	25.9644	25.6647
	0.499636	-0.123979	P78371	P78371	T-complex protein 1 subunit beta	CCT2	Color2 [DarkGray]	1	4					35	35	35	76.8	76.8	76.8	57.488	0	323.31	19083000000	227	31.3024	31.1835	31.4398	31.3992	31.3152	31.5832
	0.800529	-0.110017	P78527	P78527	DNA-dependent protein kinase catalytic subunit	PRKDC	Color2 [DarkGray]	1	4					118	118	118	32.1	32.1	32.1	469.08	0	323.31	6591000000	386	29.658	29.8125	29.8491	29.8607	29.9324	29.8566
	0.407918	-0.654391	P80303	P80303	Nucleobindin-2;Nesfatin-1	NUCB2	Color2 [DarkGray]	1	4					10	9	9	33.8	31.9	31.9	50.195	0	20.746	285590000	23	23.4133	25.4476	25.4079	25.2935	25.6348	25.3037
	0.541053	0.252575	P80723	P80723	Brain acid soluble protein 1	BASP1	Color2 [DarkGray]	1	4					9	9	9	69.6	69.6	69.6	22.693	0	84.152	3139400000	54	28.9879	28.6031	29.0984	28.8279	28.3661	28.7377
	0.166768	-0.0738792	P82650	P82650	28S ribosomal protein S22, mitochondrial	MRPS22	Color2 [DarkGray]	1	4					10	10	10	31.7	31.7	31.7	41.28	0	31.284	221860000	30	24.7897	24.9986	24.8407	24.8915	25.2427	24.7164
	0.00642757	0.0130075	P82912	P82912	28S ribosomal protein S11, mitochondrial	MRPS11	Color2 [DarkGray]	1	4					3	3	3	29.4	29.4	29.4	20.616	0	15.333	110890000	12	23.8909	23.6227	23.5853	22.3878	24.5082	24.1639
	0.354196	-0.107283	P82930	P82930	28S ribosomal protein S34, mitochondrial	MRPS34	Color2 [DarkGray]	1	4					6	6	6	38.5	38.5	38.5	25.65	0	33.817	277500000	24	25.3716	25.0995	25.0635	25.3399	25.3888	25.1278
	0.797382	-1.07887	P82933	P82933	28S ribosomal protein S9, mitochondrial	MRPS9	Color2 [DarkGray]	1	4					8	8	8	26.8	26.8	26.8	45.834	0	28.843	244240000	20	24.8985	25.0565	23.128	25.3407	25.6252	25.3537
	1.47576	0.49504	P83111	P83111	Serine beta-lactamase-like protein LACTB, mitochondrial	LACTB	Color2 [DarkGray]	1	4					10	10	10	20.5	20.5	20.5	60.693	0	53.778	292790000	27	25.922	25.6574	25.4184	25.0755	25.2663	25.1709
	0.723994	0.261319	P83731	P83731	60S ribosomal protein L24	RPL24	Color2 [DarkGray]	1	4					7	7	7	36.9	36.9	36.9	17.779	0	29.292	4059100000	41	29.1494	29.6243	29.1119	29.0369	29.0485	29.0163
	0.678463	0.464441	P83881;Q969Q0	P83881;Q969Q0	60S ribosomal protein L36a;60S ribosomal protein L36a-like	RPL36A;RPL36AL	Color2 [DarkGray]	1	4					7	7	7	46.2	46.2	46.2	12.441	0	17.54	1500700000	29	28.1383	27.4238	28.3614	27.5886	27.2569	27.6846
	0.219799	0.0907332	P84085	P84085	ADP-ribosylation factor 5	ARF5	Color2 [DarkGray]	1	4					10	5	5	53.9	30	30	20.529	0	23.345	401470000	23	25.6825	25.7288	26.1264	25.689	25.9098	25.6667
	0.365409	0.0439593	P84090	P84090	Enhancer of rudimentary homolog	ERH	Color2 [DarkGray]	1	4					5	5	5	48.1	48.1	48.1	12.259	0	29.319	1068100000	25	27.2511	27.2077	27.2675	27.1042	27.2442	27.2461
	1.12913	0.587731	P84098	P84098	60S ribosomal protein L19	RPL19	Color2 [DarkGray]	1	4					7	7	7	26.5	26.5	26.5	23.466	0	26.836	6184300000	58	30.1019	29.8543	30.2098	29.6734	29.0259	29.7035
	0.0534924	-0.0520757	P84103	P84103	Serine/arginine-rich splicing factor 3	SRSF3	Color2 [DarkGray]	1	4					3	3	3	16.5	16.5	16.5	19.329	0	7.438	394210000	14	25.9405	25.4398	25.8321	25.8934	25.2278	26.2474
	0.403458	-0.318634	P99999;CON__P62894	P99999	Cytochrome c	CYCS	Color2 [DarkGray]	1	4					5	5	5	41.9	41.9	41.9	11.749	0	22.501	428850000	20	25.2699	25.6266	26.3061	26.0057	26.3155	25.8372
	0.379818	0.724961	Q00169	Q00169	Phosphatidylinositol transfer protein alpha isoform	PITPNA	Color2 [DarkGray]	1	4					13	13	11	49.3	49.3	43	31.806	0	37.335	360050000	33	25.2961	25.9451	26.0249	25.914	25.6765	23.5008
	0.88327	0.235422	Q00325	Q00325	Phosphate carrier protein, mitochondrial	SLC25A3	Color2 [DarkGray]	1	4					10	10	10	27.1	27.1	27.1	40.094	0	38.794	1592400000	44	27.6903	27.9559	28.0877	27.6	27.6829	27.7447
	0.638386	-0.171408	Q00341	Q00341	Vigilin	HDLBP	Color2 [DarkGray]	1	4					32	32	32	31.6	31.6	31.6	141.45	0	159.61	1713300000	115	27.881	27.7927	27.7157	27.7464	28.0985	28.0587
	0.811382	0.817253	Q00535	Q00535	Cyclin-dependent-like kinase 5	CDK5	Color2 [DarkGray]	1	4					4	3	3	13	10.3	10.3	33.304	0	7.1751	108080000	13	23.7607	24.2711	24.3088	22.4348	23.7636	23.6904
	0.0794244	0.0113462	Q00610	Q00610	Clathrin heavy chain 1	CLTC	Color2 [DarkGray]	1	4					90	90	70	62.3	62.3	51.9	191.61	0	323.31	56061000000	648	32.9946	32.9273	32.898	32.8513	32.9933	32.9413
	0.303058	-0.233786	Q00653	Q00653	Nuclear factor NF-kappa-B p100 subunit;Nuclear factor NF-kappa-B p52 subunit	NFKB2	Color2 [DarkGray]	1	4					8	8	8	10	10	10	96.748	0	14.813	103740000	16	23.2565	24.2447	23.8366	23.797	24.2388	24.0034
	0.644831	-0.136006	Q00688	Q00688	Peptidyl-prolyl cis-trans isomerase FKBP3	FKBP3	Color2 [DarkGray]	1	4					11	11	11	50.9	50.9	50.9	25.177	0	112.99	3120600000	65	28.6314	28.7221	28.5803	28.7398	28.9453	28.6567
	0.0898885	0.0782013	Q00765	Q00765	Receptor expression-enhancing protein 5	REEP5	Color2 [DarkGray]	1	4					6	6	6	24.9	24.9	24.9	21.493	0	19.776	981250000	36	27.2332	26.7732	27.3441	27.3747	26.5371	27.2041
	0.976318	0.276452	Q00796	Q00796	Sorbitol dehydrogenase	SORD	Color2 [DarkGray]	1	4					13	13	13	49.9	49.9	49.9	38.324	0	95.605	856440000	46	27.2241	27.1003	26.9404	26.6171	26.8447	26.9737
	0.00997654	-0.00377019	Q00839	Q00839	Heterogeneous nuclear ribonucleoprotein U	HNRNPU	Color2 [DarkGray]	1	4					24	24	24	32.5	32.5	32.5	90.583	0	179.79	9894800000	160	30.5997	30.3864	30.2713	30.5001	30.2649	30.5037
	0.28332	0.0876598	Q01082;O15020;P11277	Q01082	Spectrin beta chain, non-erythrocytic 1	SPTBN1	Color2 [DarkGray]	1	4					116	116	115	58.3	58.3	58	274.61	0	323.31	12636000000	505	30.8318	30.7441	30.8944	30.6415	30.968	30.5977
	0.063246	-0.0479692	Q01085;P31483	Q01085	Nucleolysin TIAR	TIAL1	Color2 [DarkGray]	1	4					5	5	5	15.5	15.5	15.5	41.59	0	17.765	157860000	16	24.5705	24.0567	24.8052	24.7879	24.2926	24.4959
	1.41009	-0.171296	Q01105;P0DME0	Q01105;P0DME0	Protein SET;Protein SETSIP	SET;SETSIP	Color2 [DarkGray]	1	4					10	10	10	45.2	45.2	45.2	33.488	0	321.22	9868400000	72	30.4224	30.2965	30.2821	30.5489	30.5299	30.4361
	0.096757	0.0502389	Q01130;Q9BRL6	Q01130	Serine/arginine-rich splicing factor 2	SRSF2	Color2 [DarkGray]	1	4					6	6	6	28.5	28.5	28.5	25.476	0	60.765	1737900000	24	27.762	28.0834	28.0846	27.7109	28.2191	27.8493
	2.27211	-0.159534	Q01469;A8MUU1	Q01469	Fatty acid-binding protein, epidermal	FABP5	Color2 [DarkGray]	1	4					13	13	13	77	77	77	15.164	0	138.3	5959600000	94	29.5586	29.6265	29.6522	29.7864	29.7704	29.7592
	0.118952	0.0191708	Q01518	Q01518	Adenylyl cyclase-associated protein 1	CAP1	Color2 [DarkGray]	1	4					25	25	24	59.8	59.8	58.1	51.901	0	299.77	9916100000	147	30.527	30.3624	30.5027	30.4606	30.4846	30.3895
	1.5285	-0.355233	Q01581;P54868	Q01581	Hydroxymethylglutaryl-CoA synthase, cytoplasmic	HMGCS1	Color2 [DarkGray]	1	4					15	15	15	43.5	43.5	43.5	57.293	0	87.685	1181900000	61	27.2957	27.0781	27.0071	27.5994	27.3835	27.4637
	0.424473	-0.193456	Q01650;Q9UM01	Q01650	Large neutral amino acids transporter small subunit 1	SLC7A5	Color2 [DarkGray]	1	4					5	5	4	12.6	12.6	11.2	55.01	0	57.624	1644900000	34	27.7412	27.518	28.0143	28.2003	27.7544	27.8992
	0.0471053	0.0198269	Q01844	Q01844	RNA-binding protein EWS	EWSR1	Color2 [DarkGray]	1	4					7	7	7	13.7	13.7	13.7	68.477	0	49.93	434050000	31	25.9953	26.1094	25.6738	25.786	25.9865	25.9466
	0.362939	0.0672251	Q02218;Q9ULD0	Q02218	2-oxoglutarate dehydrogenase, mitochondrial	OGDH	Color2 [DarkGray]	1	4					18	18	18	23.9	23.9	23.9	115.93	0	74.289	530130000	47	26.2011	26.1628	26.3988	26.1758	26.1502	26.235
	1.2655	0.574305	Q02543	Q02543	60S ribosomal protein L18a	RPL18A	Color2 [DarkGray]	1	4					13	13	13	55.7	55.7	55.7	20.762	0	30.449	4186700000	92	29.5254	29.2331	29.6677	29.042	28.5622	29.0991
	0.387118	-0.157963	Q02750	Q02750	Dual specificity mitogen-activated protein kinase kinase 1	MAP2K1	Color2 [DarkGray]	1	4					15	15	9	33.6	33.6	22.9	43.439	0	41.054	933230000	62	26.6139	26.8908	27.2007	27.014	27.1123	27.0529
	0.442645	-0.055603	Q02790	Q02790	Peptidyl-prolyl cis-trans isomerase FKBP4;Peptidyl-prolyl cis-trans isomerase FKBP4, N-terminally processed	FKBP4	Color2 [DarkGray]	1	4					34	34	34	75.4	75.4	75.4	51.804	0	285.94	8513300000	202	30.0711	30.1615	30.2287	30.2533	30.2195	30.1553
	0.289152	-0.13324	Q02809	Q02809	Procollagen-lysine,2-oxoglutarate 5-dioxygenase 1	PLOD1	Color2 [DarkGray]	1	4					8	8	8	13.6	13.6	13.6	83.549	0	34.461	209820000	20	24.6449	24.849	24.7192	24.8996	25.1612	24.5521
	0.969955	-0.395808	Q02978	Q02978	Mitochondrial 2-oxoglutarate/malate carrier protein	SLC25A11	Color2 [DarkGray]	1	4					8	8	8	31.8	31.8	31.8	34.061	0	32.683	282600000	30	24.8139	25.0994	25.1874	25.1791	25.7111	25.3979
	0.14386	0.601843	Q03135;P56539	Q03135	Caveolin-1	CAV1	Color2 [DarkGray]	1	4					4	4	4	29.8	29.8	29.8	20.471	0	15.88	371650000	13	26.1408	22.9951	26.5296	22.4704	25.5974	25.7922
	0.0801507	0.223354	Q03169	Q03169	Tumor necrosis factor alpha-induced protein 2	TNFAIP2	Color2 [DarkGray]	1	4					6	6	6	13.1	13.1	13.1	72.66	0	17.477	184160000	14	25.193	24.535	23.6069	25.2366	22.4918	24.9364
	0.043394	-0.0249322	Q04206	Q04206	Transcription factor p65	RELA	Color2 [DarkGray]	1	4					7	7	7	15.6	15.6	15.6	60.218	0	16.124	171170000	29	24.3852	24.8868	24.3221	24.3954	24.6292	24.6443
	0.842823	-0.161619	Q04446	Q04446	1,4-alpha-glucan-branching enzyme	GBE1	Color2 [DarkGray]	1	4					19	19	19	40.3	40.3	40.3	80.473	0	115.53	1711100000	83	27.7218	27.718	27.9281	28.0136	27.8398	27.9994
	0.805325	0.252561	Q04637;O43432	Q04637	Eukaryotic translation initiation factor 4 gamma 1	EIF4G1	Color2 [DarkGray]	1	4					35	35	35	24.2	24.2	24.2	175.49	0	196.89	2868700000	125	29.0019	28.5579	28.7372	28.5175	28.6258	28.3959
	1.40087	-0.146014	Q04760	Q04760	Lactoylglutathione lyase	GLO1	Color2 [DarkGray]	1	4					12	12	12	70.1	70.1	70.1	20.777	0	74.438	2116500000	63	28.201	28.0423	28.1622	28.2802	28.2662	28.297
	0.0331321	-0.016269	Q04837	Q04837	Single-stranded DNA-binding protein, mitochondrial	SSBP1	Color2 [DarkGray]	1	4					8	8	8	48.6	48.6	48.6	17.259	0	64.17	960830000	34	26.7547	27.208	27.2796	27.1306	27.1044	27.056
	0.153917	0.128832	Q04917	Q04917	14-3-3 protein eta	YWHAH	Color2 [DarkGray]	1	4					15	11	11	54.1	41.1	41.1	28.218	0	52.284	1808300000	52	27.8688	27.972	28.3352	28.2188	27.3719	28.1989
	0.917786	-0.193754	Q05193	Q05193	Dynamin-1	DNM1	Color2 [DarkGray]	1	4					27	27	19	33.9	33.9	25.1	97.407	0	114.99	1611400000	100	27.6538	27.5779	27.8579	27.8333	27.9946	27.8428
	1.45257	0.314015	Q05397;Q14289	Q05397	Focal adhesion kinase 1	PTK2	Color2 [DarkGray]	1	4					16	16	16	19.2	19.2	19.2	119.23	0	56.999	473400000	46	26.3511	26.1469	26.1961	25.8151	25.8633	26.0736
	1.60003	0.390972	Q05639	Q05639	Elongation factor 1-alpha 2	EEF1A2	Color2 [DarkGray]	1	4					21	7	7	64.4	34.1	34.1	50.47	0	103.17	2369700000	30	28.775	28.423	28.5165	28.1966	28.2374	28.1075
	0.939667	0.299974	Q05682;REV__Q13136;REV__O75334	Q05682	Caldesmon	CALD1	Color2 [DarkGray]	1	4					8	8	8	12.2	12.2	12.2	93.23	0	26.263	428460000	29	25.794	26.1499	26.2781	25.804	25.8165	25.7016
	1.32923	-0.32349	Q06124	Q06124	Tyrosine-protein phosphatase non-receptor type 11	PTPN11	Color2 [DarkGray]	1	4					15	15	15	30	30	30	68.436	0	62.717	483350000	40	25.986	25.7282	25.888	26.2905	26.0205	26.2617
	0.118637	-0.055006	Q06203	Q06203	Amidophosphoribosyltransferase	PPAT	Color2 [DarkGray]	1	4					8	8	8	18.6	18.6	18.6	57.398	0	23.887	253010000	23	24.8871	25.2802	25.0999	25.0741	25.3868	24.9713
	0.930354	-0.138321	Q06210	Q06210	Glutamine--fructose-6-phosphate aminotransferase [isomerizing] 1	GFPT1	Color2 [DarkGray]	1	4					38	38	31	62.5	62.5	52.5	78.806	0	178.93	3448000000	162	28.7925	28.7588	28.9045	28.9956	28.8507	29.0245
	0.450644	0.0746969	Q06323	Q06323	Proteasome activator complex subunit 1	PSME1	Color2 [DarkGray]	1	4					15	15	15	63.9	63.9	63.9	28.723	0	97.425	4686500000	101	29.4199	29.4535	29.4288	29.3626	29.2354	29.4801
	1.52881	-0.323447	Q06830	Q06830	Peroxiredoxin-1	PRDX1	Color2 [DarkGray]	1	4					19	19	15	79.4	79.4	64.3	22.11	0	225.61	63349000000	213	32.9413	32.9255	32.8917	33.4053	33.0712	33.2524
	1.37248	0.338221	Q07020	Q07020	60S ribosomal protein L18	RPL18	Color2 [DarkGray]	1	4					9	9	9	43.1	43.1	43.1	21.634	0	48.414	7779700000	49	30.0521	30.3073	30.4232	29.9806	29.9275	29.8598
	1.5156	0.331784	Q07021	Q07021	Complement component 1 Q subcomponent-binding protein, mitochondrial	C1QBP	Color2 [DarkGray]	1	4					7	7	7	33.7	33.7	33.7	31.362	0	119.1	6691200000	55	30.1221	29.9512	30.0225	29.5807	29.8722	29.6474
	0.321005	-0.115072	Q07065	Q07065	Cytoskeleton-associated protein 4	CKAP4	Color2 [DarkGray]	1	4					22	22	22	46.7	46.7	46.7	66.022	0	171.5	2363600000	107	28.1092	28.4176	28.3182	28.278	28.6278	28.2845
	1.47746	-0.254162	Q07157	Q07157	Tight junction protein ZO-1	TJP1	Color2 [DarkGray]	1	4					47	47	47	37.7	37.7	37.7	195.46	0	173.34	2974100000	189	28.3876	28.5996	28.582	28.7411	28.8606	28.7301
	0.279088	0.353147	Q07817	Q07817	Bcl-2-like protein 1	BCL2L1	Color2 [DarkGray]	1	4					3	3	3	12	12	12	26.049	0	6.297	101900000	13	23.7851	24.1897	24.2521	24.0952	22.7561	24.3161
	0.989472	0.283331	Q07866;Q9NSK0	Q07866	Kinesin light chain 1	KLC1	Color2 [DarkGray]	1	4					18	18	13	35.1	35.1	23.9	65.309	0	75.82	877630000	67	26.8439	27.1099	27.2658	26.7869	26.8838	26.6988
	0.583223	-0.314216	Q07955;Q13242	Q07955	Serine/arginine-rich splicing factor 1	SRSF1	Color2 [DarkGray]	1	4					12	12	12	43.5	43.5	43.5	27.744	0	34.295	839930000	40	26.2308	26.8983	26.7929	26.9558	27.1653	26.7435
	1.10257	0.433974	Q07960	Q07960	Rho GTPase-activating protein 1	ARHGAP1	Color2 [DarkGray]	1	4					14	14	14	49.2	49.2	49.2	50.435	0	94.354	1196700000	47	27.7813	27.239	27.7462	27.0357	27.2128	27.2161
	0.326893	0.092411	Q07973	Q07973	1,25-dihydroxyvitamin D(3) 24-hydroxylase, mitochondrial	CYP24A1	Color2 [DarkGray]	1	4					10	10	10	24.3	24.3	24.3	58.875	0	37.475	506180000	35	26.3966	26.0778	26.0509	26.0522	26.1515	26.0444
	0.00801499	0.00246175	Q08211	Q08211	ATP-dependent RNA helicase A	DHX9	Color2 [DarkGray]	1	4					37	37	37	36.1	36.1	36.1	140.96	0	265.7	3326800000	157	28.8709	28.9975	28.7307	28.8321	28.9894	28.7703
	2.10023	0.337701	Q08257	Q08257	Quinone oxidoreductase	CRYZ	Color2 [DarkGray]	1	4					17	17	17	67.5	67.5	67.5	35.206	0	136.31	3329700000	83	29.0671	29.0375	29.0044	28.8308	28.6403	28.6248
	0.129032	-0.061238	Q08752	Q08752	Peptidyl-prolyl cis-trans isomerase D	PPID	Color2 [DarkGray]	1	4					7	7	7	21.4	21.4	21.4	40.763	0	24.813	528080000	26	25.841	26.3094	26.2592	26.3691	26.1661	26.0582
	0.508937	0.102751	Q08945	Q08945	FACT complex subunit SSRP1	SSRP1	Color2 [DarkGray]	1	4					20	20	20	26.5	26.5	26.5	81.074	0	80.669	1615100000	76	27.7884	27.8159	28.0089	27.6858	27.747	27.8721
	1.45599	0.162805	Q08J23	Q08J23	tRNA (cytosine(34)-C(5))-methyltransferase	NSUN2	Color2 [DarkGray]	1	4					23	23	23	34.4	34.4	34.4	86.47	0	102.25	1519500000	86	27.8278	27.7603	27.7653	27.6984	27.6309	27.5358
	1.46621	-0.498233	Q09161	Q09161	Nuclear cap-binding protein subunit 1	NCBP1	Color2 [DarkGray]	1	4					20	20	20	30.3	30.3	30.3	91.838	0	79.081	698400000	65	26.391	26.1362	26.4247	26.7645	27.0595	26.6226
	0.593597	0.138378	Q09666	Q09666	Neuroblast differentiation-associated protein AHNAK	AHNAK	Color2 [DarkGray]	1	4					124	124	124	44.5	44.5	44.5	629.09	0	323.31	7733100000	455	30.3175	30.0607	30.0347	29.9004	30.0771	30.0204
	0.73221	0.107112	Q10471	Q10471	Polypeptide N-acetylgalactosaminyltransferase 2;Polypeptide N-acetylgalactosaminyltransferase 2 soluble form	GALNT2	Color2 [DarkGray]	1	4					19	19	18	40.1	40.1	38.4	64.732	0	99.067	1424300000	78	27.7112	27.6026	27.7796	27.5091	27.6087	27.6542
	0.214261	-0.241329	Q10713	Q10713	Mitochondrial-processing peptidase subunit alpha	PMPCA	Color2 [DarkGray]	1	4					7	7	7	17.5	17.5	17.5	58.252	0	28.01	133070000	17	24.4584	24.4851	23.4567	23.8534	24.7989	24.4719
	1.2176	0.432823	Q12765	Q12765	Secernin-1	SCRN1	Color2 [DarkGray]	1	4					9	9	9	27.8	27.8	27.8	46.382	0	25.425	350810000	27	26.0604	25.6116	25.9403	25.2669	25.4354	25.6115
	0.43287	0.120318	Q12768	Q12768	WASH complex subunit strumpellin	KIAA0196	Color2 [DarkGray]	1	4					16	16	16	17.1	17.1	17.1	134.28	0	44.043	348180000	52	25.809	25.4337	25.6809	25.5098	25.6037	25.4492
	0.681491	-0.208299	Q12792	Q12792	Twinfilin-1	TWF1	Color2 [DarkGray]	1	4					14	12	12	49.7	45.7	45.7	40.282	0	96.17	1276800000	68	27.1551	27.3258	27.6267	27.5514	27.5704	27.6106
	1.17772	0.350216	Q12797	Q12797	Aspartyl/asparaginyl beta-hydroxylase	ASPH	Color2 [DarkGray]	1	4					28	28	28	44.9	44.9	44.9	85.862	0	270.58	3698800000	128	29.2634	29.193	29.0051	28.7581	29.0245	28.6283
	1.40817	-0.887565	Q12802	Q12802	A-kinase anchor protein 13	AKAP13	Color2 [DarkGray]	1	4					13	13	13	6.8	6.8	6.8	307.55	0	35.491	167460000	29	23.7539	24.4046	23.6964	24.7285	25.2024	24.5866
	0.227322	-0.113391	Q12904	Q12904	Aminoacyl tRNA synthase complex-interacting multifunctional protein 1;Endothelial monocyte-activating polypeptide 2	AIMP1	Color2 [DarkGray]	1	4					16	16	16	76.3	76.3	76.3	34.352	0	86.332	1332300000	78	27.7434	27.5509	27.1382	27.434	27.6528	27.6858
	0.0811737	0.0543238	Q12905	Q12905	Interleukin enhancer-binding factor 2	ILF2	Color2 [DarkGray]	1	4					10	10	10	29.5	29.5	29.5	43.062	0	44.717	762250000	33	26.4299	26.7729	27.0306	26.9766	26.4232	26.6706
	0.420751	-0.115046	Q12906	Q12906	Interleukin enhancer-binding factor 3	ILF3	Color2 [DarkGray]	1	4					18	18	16	23.6	23.6	21	95.337	0	110.99	1265400000	81	27.3534	27.4756	27.3699	27.602	27.6461	27.296
	0.328615	-0.0631262	Q12931	Q12931	Heat shock protein 75 kDa, mitochondrial	TRAP1	Color2 [DarkGray]	1	4					25	25	25	38.1	38.1	38.1	80.109	0	128.36	3210800000	122	28.632	28.8791	28.7861	28.8677	28.8547	28.7643
	0.332784	0.058644	Q12965;O00160	Q12965	Unconventional myosin-Ie	MYO1E	Color2 [DarkGray]	1	4					25	25	25	28.6	28.6	28.6	127.06	0	111.52	825200000	68	26.892	26.7822	27.0044	26.7866	26.9002	26.8159
	0.31296	-0.0634467	Q13045	Q13045	Protein flightless-1 homolog	FLII	Color2 [DarkGray]	1	4					23	23	23	22.1	22.1	22.1	144.75	0	92.96	1044300000	83	27.2211	27.1704	27.0693	27.302	27.2705	27.0787
	0.0915012	0.050251	Q13057	Q13057	Bifunctional coenzyme A synthase;Phosphopantetheine adenylyltransferase;Dephospho-CoA kinase	COASY	Color2 [DarkGray]	1	4					7	7	7	17.9	17.9	17.9	62.328	0	24.041	316710000	24	25.6592	25.5907	25.3425	25.423	25.8003	25.2185
	0.963549	-0.153451	Q13085;O00763	Q13085	Acetyl-CoA carboxylase 1;Biotin carboxylase	ACACA	Color2 [DarkGray]	1	4					60	60	60	33.8	33.8	33.8	265.55	0	218.67	2048000000	184	28.2083	28.0124	27.9945	28.2338	28.2715	28.1703
	0.0695141	0.0288804	Q13098	Q13098	COP9 signalosome complex subunit 1	GPS1	Color2 [DarkGray]	1	4					13	13	13	31	31	31	55.536	0	63.384	717960000	51	26.8037	26.4488	26.7758	26.6659	26.4827	26.793
	0.410539	-0.219724	Q13131;P54646	Q13131	5-AMP-activated protein kinase catalytic subunit alpha-1	PRKAA1	Color2 [DarkGray]	1	4					5	5	5	10.9	10.9	10.9	64.009	0	18.974	98613000	14	23.9047	23.6961	23.3442	23.7447	23.678	24.1816
	0.0565494	0.0230929	Q13148	Q13148	TAR DNA-binding protein 43	TARDBP	Color2 [DarkGray]	1	4					6	6	6	21	21	21	44.739	0	33.22	289140000	20	25.1831	25.4701	25.2509	25.1382	25.4983	25.1982
	0.110152	-0.0887032	Q13151	Q13151	Heterogeneous nuclear ribonucleoprotein A0	HNRNPA0	Color2 [DarkGray]	1	4					7	7	7	30.8	30.8	30.8	30.84	0	40.758	504450000	32	25.9273	25.8949	26.1363	26.1082	26.5447	25.5717
	0.182561	0.0794462	Q13155	Q13155	Aminoacyl tRNA synthase complex-interacting multifunctional protein 2	AIMP2	Color2 [DarkGray]	1	4					7	7	7	27.8	27.8	27.8	35.348	0	40.293	819440000	30	27.0629	26.9075	26.6037	26.9347	26.6024	26.7986
	0.366099	-0.095267	Q13162	Q13162	Peroxiredoxin-4	PRDX4	Color2 [DarkGray]	1	4					14	11	11	56.5	49.4	49.4	30.54	0	134.38	3700100000	76	29.0984	29.008	28.7473	29.0054	29.0358	29.0983
	0.337014	-0.115156	Q13177;Q13153;O75914	Q13177	Serine/threonine-protein kinase PAK 2;PAK-2p27;PAK-2p34	PAK2	Color2 [DarkGray]	1	4					16	16	16	34.9	34.9	34.9	58.042	0	42.482	482820000	46	25.9683	26.1425	25.898	26.2015	25.8798	26.2731
	0.487029	-0.307069	Q13185;P45973	Q13185	Chromobox protein homolog 3	CBX3	Color2 [DarkGray]	1	4					8	8	7	42.6	42.6	33.9	20.811	0	59.479	1492700000	37	26.9815	27.7029	27.7549	27.7354	28.0051	27.62
	1.12115	-0.226955	Q13190	Q13190	Syntaxin-5	STX5	Color2 [DarkGray]	1	4					4	4	4	16.1	16.1	16.1	39.672	0	7.6499	70646000	12	23.3141	23.3236	23.1563	23.4371	23.3919	23.6459
	0.181511	-0.0563145	Q13200	Q13200	26S proteasome non-ATPase regulatory subunit 2	PSMD2	Color2 [DarkGray]	1	4					41	41	41	54.1	54.1	54.1	100.2	0	304.34	5734500000	205	29.5481	29.5556	29.7285	29.6867	29.4807	29.8337
	0.086656	-0.0865809	Q13243	Q13243	Serine/arginine-rich splicing factor 5	SRSF5	Color2 [DarkGray]	1	4					5	4	4	21	17.6	17.6	31.263	0	16.255	194730000	16	24.2844	24.4377	25.1197	24.2125	24.9739	24.9152
	0.380563	-0.196225	Q13247;Q08170	Q13247	Serine/arginine-rich splicing factor 6	SRSF6	Color2 [DarkGray]	1	4					10	10	9	27.9	27.9	25.3	39.586	0	33.588	998980000	50	26.6721	27.0155	27.2422	27.0224	27.4517	27.0444
	1.47288	-0.361083	Q13263	Q13263	Transcription intermediary factor 1-beta	TRIM28	Color2 [DarkGray]	1	4					26	26	26	52.5	52.5	52.5	88.549	0	159.44	3433400000	119	28.8285	28.6198	28.5474	28.9991	29.1699	28.9098
	1.35047	-0.276337	Q13283	Q13283	Ras GTPase-activating protein-binding protein 1	G3BP1	Color2 [DarkGray]	1	4					18	18	17	51.9	51.9	49.4	52.164	0	206.46	3558100000	102	28.8108	28.6855	28.8145	29.1064	29.1559	28.8775
	0.0572136	0.0348339	Q13310;P0CB38	Q13310	Polyadenylate-binding protein 4	PABPC4	Color2 [DarkGray]	1	4					24	14	12	36	20	18.5	70.782	0	84.708	639630000	55	26.1404	26.7629	26.6165	26.3379	26.6548	26.4226
	0.61098	0.124487	Q13347	Q13347	Eukaryotic translation initiation factor 3 subunit I	EIF3I	Color2 [DarkGray]	1	4					12	12	12	56.3	56.3	56.3	36.501	0	180.09	2042500000	66	28.284	28.2126	28.1312	27.9433	28.2204	28.0906
	0.60042	-0.320436	Q13404	Q13404	Ubiquitin-conjugating enzyme E2 variant 1	UBE2V1	Color2 [DarkGray]	1	4					7	7	3	40.8	40.8	17	16.495	0	20.674	1384700000	36	26.946	27.5911	27.7011	27.7881	27.7567	27.6547
	0.671902	0.271047	Q13409	Q13409	Cytoplasmic dynein 1 intermediate chain 2	DYNC1I2	Color2 [DarkGray]	1	4					10	10	10	21.2	21.2	21.2	71.456	0	42.935	593990000	47	26.3627	26.3627	26.8276	26.3056	26.0562	26.378
	0.974089	-0.545162	Q13435	Q13435	Splicing factor 3B subunit 2	SF3B2	Color2 [DarkGray]	1	4					20	20	20	30.9	30.9	30.9	100.23	0	78.488	1051100000	62	26.3043	27.0513	27.1191	27.3466	27.42	27.3436
	1.01983	-0.491792	Q13439	Q13439	Golgin subfamily A member 4	GOLGA4	Color2 [DarkGray]	1	4					19	19	19	10	10	10	261.14	0	34.256	156700000	32	23.8236	24.2687	24.4148	24.9289	24.4562	24.5974
	1.38165	0.338248	Q13492;O60641	Q13492	Phosphatidylinositol-binding clathrin assembly protein	PICALM	Color2 [DarkGray]	1	4					8	8	8	18.1	18.1	18.1	70.754	0	53.114	378190000	27	25.9717	26.0317	25.788	25.545	25.4697	25.762
	0.0735405	0.0313594	Q13501	Q13501	Sequestosome-1	SQSTM1	Color2 [DarkGray]	1	4					17	17	17	55.7	55.7	55.7	47.687	0	127.91	3078400000	107	28.9243	28.8616	28.4501	28.7366	28.6822	28.7232
	0.407918	-0.755848	Q13526	Q13526	Peptidyl-prolyl cis-trans isomerase NIMA-interacting 1	PIN1	Color2 [DarkGray]	1	4					5	5	5	44.8	44.8	44.8	18.243	0	51.578	182890000	18	24.6948	24.7163	22.398	24.5607	25.0174	24.4986
	0.268129	-0.183776	Q13547;Q92769	Q13547;Q92769	Histone deacetylase 1;Histone deacetylase 2	HDAC1;HDAC2	Color2 [DarkGray]	1	4					3	3	3	8.9	8.9	8.9	55.102	0	10.56	95358000	13	23.2697	23.856	23.6494	23.3977	23.7913	24.1375
	2.18706	0.331989	Q13561	Q13561	Dynactin subunit 2	DCTN2	Color2 [DarkGray]	1	4					15	15	15	47.1	47.1	47.1	44.23	0	167.06	1329100000	56	27.6858	27.7395	27.6976	27.3107	27.3173	27.499
	0.338583	-0.150987	Q13564	Q13564	NEDD8-activating enzyme E1 regulatory subunit	NAE1	Color2 [DarkGray]	1	4					7	7	7	19.5	19.5	19.5	60.246	0	54.641	290110000	23	25.4181	25.1824	24.9307	25.2702	25.1571	25.5569
	0.999942	-0.283905	Q13596	Q13596	Sorting nexin-1	SNX1	Color2 [DarkGray]	1	4					17	17	15	33.7	33.7	29.7	59.069	0	79.352	644880000	46	26.1017	26.2422	26.4233	26.6503	26.6186	26.35
	0.0666085	0.0239162	Q13616	Q13616	Cullin-1	CUL1	Color2 [DarkGray]	1	4					10	10	10	17.9	17.9	17.9	89.677	0	38.879	355710000	28	25.7533	25.5623	25.4728	25.6882	25.6424	25.3861
	0.924519	-0.390089	Q13617	Q13617	Cullin-2	CUL2	Color2 [DarkGray]	1	4					13	13	13	17.4	17.4	17.4	86.982	0	30.873	263370000	31	24.7573	24.8683	25.0235	25.3781	25.5215	24.9199
	0.884795	0.429344	Q13618	Q13618	Cullin-3	CUL3	Color2 [DarkGray]	1	4					9	9	9	13.4	13.4	13.4	88.929	0	30.437	190510000	25	24.7828	24.894	24.9172	24.573	24.0005	24.7325
	0.0255994	0.0077432	Q13620	Q13620	Cullin-4B	CUL4B	Color2 [DarkGray]	1	4					13	13	8	13.1	13.1	8.4	103.98	0	35.057	404560000	50	25.9343	25.7186	25.7204	25.7897	25.9043	25.6561
	0.694265	0.843884	Q13630	Q13630	GDP-L-fucose synthase	TSTA3	Color2 [DarkGray]	1	4					6	6	6	25.2	25.2	25.2	35.892	0	18.779	215450000	20	25.2893	25.1049	25.1242	24.9763	23.2337	24.7768
	0.00852979	-0.00583649	Q13637;O14966;P57729	Q13637	Ras-related protein Rab-32	RAB32	Color2 [DarkGray]	1	4					5	5	5	31.1	31.1	31.1	24.997	0	14.824	130330000	21	24.3979	24.0985	23.9911	23.8416	24.4973	24.1661
	0.837877	0.446236	Q13685	Q13685	Angio-associated migratory cell protein	AAMP	Color2 [DarkGray]	1	4					3	3	3	9.7	9.7	9.7	46.75	0	16.956	118930000	20	24.4543	24.4972	23.7711	23.8239	23.9089	23.6512
	0.802303	1.15973	Q13724	Q13724	Mannosyl-oligosaccharide glucosidase	MOGS	Color2 [DarkGray]	1	4					8	8	8	13.3	13.3	13.3	91.916	0	43.519	335300000	25	26.1166	25.6268	26.0676	25.3026	25.5441	23.4852
	0.167208	0.089421	Q13740	Q13740	CD166 antigen	ALCAM	Color2 [DarkGray]	1	4					13	13	13	32.4	32.4	32.4	65.102	0	75.562	1009200000	54	27.4183	27.1678	26.8258	27.069	27.2197	26.855
	0.0864857	0.037653	Q13813	Q13813	Spectrin alpha chain, non-erythrocytic 1	SPTAN1	Color2 [DarkGray]	1	4					120	120	120	54.6	54.6	54.6	284.54	0	323.31	14835000000	543	31.0759	30.9274	31.0262	30.855	31.2666	30.7951
	0.0441112	0.0186488	Q13838	Q13838	Spliceosome RNA helicase DDX39B	DDX39B	Color2 [DarkGray]	1	4					13	13	5	39.7	39.7	16.6	48.991	0	61.705	1090100000	55	27.3297	27.2125	27.2145	27.1245	27.5096	27.0666
	0.486726	-0.267543	Q13907;Q9BXS1	Q13907	Isopentenyl-diphosphate Delta-isomerase 1	IDI1	Color2 [DarkGray]	1	4					6	6	6	35.7	35.7	35.7	26.319	0	22.598	341340000	20	25.3211	25.6049	25.3982	26.0461	25.2856	25.7951
	1.24798	0.324758	Q14019	Q14019	Coactosin-like protein	COTL1	Color2 [DarkGray]	1	4					14	14	14	78.2	78.2	78.2	15.945	0	113.34	6684400000	75	30.0447	29.9695	30.1151	29.8459	29.4894	29.8197
	1.12539	0.126138	Q14103	Q14103	Heterogeneous nuclear ribonucleoprotein D0	HNRNPD	Color2 [DarkGray]	1	4					13	13	12	33.8	33.8	31.5	38.434	0	72.994	2170800000	64	28.2302	28.2069	28.1044	28.0696	28.1074	27.986
	1.42171	0.385138	Q14108	Q14108	Lysosome membrane protein 2	SCARB2	Color2 [DarkGray]	1	4					7	7	7	21.3	21.3	21.3	54.29	0	57.884	862980000	31	27.2005	27.0615	27.157	26.6488	26.9925	26.6223
	0.878038	0.320101	Q14116	Q14116	Interleukin-18	IL18	Color2 [DarkGray]	1	4					7	7	7	43	43	43	22.326	0	75.361	597910000	25	26.5286	26.7944	26.306	26.0418	26.268	26.3589
	0.330559	-0.933811	Q14126	Q14126	Desmoglein-2	DSG2	Color2 [DarkGray]	1	4					9	9	9	11.7	11.7	11.7	122.29	0	28.557	560670000	25	22.9753	25.983	26.7184	26.2188	26.4825	25.7769
	0.396633	0.0495326	Q14152	Q14152	Eukaryotic translation initiation factor 3 subunit A	EIF3A	Color2 [DarkGray]	1	4					63	63	63	42	42	42	166.57	0	276.39	7623500000	285	30.1611	30.0204	30.0571	30.0917	30.0124	29.9859
	1.18647	-0.235653	Q14157	Q14157	Ubiquitin-associated protein 2-like	UBAP2L	Color2 [DarkGray]	1	4					14	14	14	23.4	23.4	23.4	114.53	0	66.248	756560000	50	26.6934	26.4836	26.4358	26.7332	26.8718	26.7146
	0.334683	0.155303	Q14160	Q14160	Protein scribble homolog	SCRIB	Color2 [DarkGray]	1	4					9	9	9	9	9	9	174.88	0	42.889	217310000	17	24.5669	25.11	25.1464	24.7678	24.8605	24.7289
	0.43064	0.274988	Q14165	Q14165	Malectin	MLEC	Color2 [DarkGray]	1	4					6	6	6	30.5	30.5	30.5	32.233	0	20.45	263290000	24	24.8291	25.7019	25.4245	25.0141	24.9023	25.2142
	0.927601	0.28148	Q14166	Q14166	Tubulin--tyrosine ligase-like protein 12	TTLL12	Color2 [DarkGray]	1	4					9	9	9	21.3	21.3	21.3	74.403	0	45.852	382430000	34	26.0097	25.8583	25.7909	25.6235	25.8134	25.3775
	0.725515	1.30336	Q14192	Q14192	Four and a half LIM domains protein 2	FHL2	Color2 [DarkGray]	1	4					9	9	9	46.6	46.6	46.6	32.193	0	20.693	245030000	28	25.2659	25.4147	25.7506	25.344	24.5579	22.6192
	0.753013	0.169428	Q14203	Q14203	Dynactin subunit 1	DCTN1	Color2 [DarkGray]	1	4					36	36	36	38	38	38	141.69	0	163.35	1358800000	112	27.5566	27.6736	27.7588	27.4703	27.3591	27.6513
	0.17163	0.0933266	Q14232	Q14232	Translation initiation factor eIF-2B subunit alpha	EIF2B1	Color2 [DarkGray]	1	4					7	7	7	22.3	22.3	22.3	33.712	0	19.217	291880000	24	25.1605	25.4665	25.4568	25.6216	25.0376	25.1447
	1.04116	0.447422	Q14244	Q14244	Ensconsin	MAP7	Color2 [DarkGray]	1	4					12	12	12	18.7	18.7	18.7	84.051	0	39.861	485910000	48	26.3528	26.1262	26.3732	25.804	25.5327	26.1734
	0.0974738	0.042977	Q14247	Q14247	Src substrate cortactin	CTTN	Color2 [DarkGray]	1	4					24	24	24	48.7	48.7	48.7	61.585	0	135.77	5162900000	126	29.4675	29.4578	29.7183	29.6648	29.241	29.6088
	0.422773	-1.26824	Q14254	Q14254	Flotillin-2	FLOT2	Color2 [DarkGray]	1	4					10	10	10	27.6	27.6	27.6	47.064	0	29.024	229280000	22	21.3118	25.0342	25.2547	25.1622	25.0596	25.1837
	0.61964	0.221687	Q14257	Q14257	Reticulocalbin-2	RCN2	Color2 [DarkGray]	1	4					5	5	5	28.1	28.1	28.1	36.876	0	48.654	735410000	22	26.8147	26.6457	26.8266	26.2853	26.804	26.5327
	0.0967491	-0.040123	Q14258	Q14258	E3 ubiquitin/ISG15 ligase TRIM25	TRIM25	Color2 [DarkGray]	1	4					15	15	15	35.9	35.9	35.9	70.973	0	58.962	493760000	43	25.8456	26.0012	26.2956	26.0094	26.2231	26.0304
	0.304955	0.0531832	Q14344	Q14344	Guanine nucleotide-binding protein subunit alpha-13	GNA13	Color2 [DarkGray]	1	4					7	7	7	23.9	23.9	23.9	44.049	0	20.533	218160000	20	24.8212	24.9386	24.882	24.9431	24.7291	24.8102
	1.5284	0.618559	Q14376	Q14376	UDP-glucose 4-epimerase	GALE	Color2 [DarkGray]	1	4					7	7	7	28.7	28.7	28.7	38.281	0	45.094	375390000	26	26.1094	26.1901	25.6108	25.3331	25.4383	25.2834
	0.648121	-0.117065	Q14444	Q14444	Caprin-1	CAPRIN1	Color2 [DarkGray]	1	4					11	11	11	20.2	20.2	20.2	78.365	0	62.785	1532400000	46	27.6528	27.6346	27.7493	27.6636	27.8069	27.9174
	0.387076	0.280309	Q14498;Q86U06	Q14498	RNA-binding protein 39	RBM39	Color2 [DarkGray]	1	4					8	8	8	20.4	20.4	20.4	59.379	0	44.232	317210000	30	25.9767	25.589	25.1885	25.2849	25.6657	24.9627
	0.15677	0.0625388	Q14558	Q14558	Phosphoribosyl pyrophosphate synthase-associated protein 1	PRPSAP1	Color2 [DarkGray]	1	4					9	7	7	33.1	27.2	27.2	39.393	0	30.345	288630000	19	25.5405	25.3603	25.1869	25.1369	25.5071	25.2561
	1.80875	-0.372917	Q14566	Q14566	DNA replication licensing factor MCM6	MCM6	Color2 [DarkGray]	1	4					27	27	27	40.8	40.8	40.8	92.888	0	104.82	1295500000	101	27.3388	27.2822	27.1331	27.5733	27.7605	27.539
	0.733422	-0.351446	Q14573;Q14643	Q14573	Inositol 1,4,5-trisphosphate receptor type 3	ITPR3	Color2 [DarkGray]	1	4					12	12	11	4.6	4.6	4.3	304.1	0	20.889	63772000	17	23.6277	23.3303	22.9325	23.5012	23.6395	23.8041
	0.380085	-0.234404	Q14651	Q14651	Plastin-1	PLS1	Color2 [DarkGray]	1	4					11	8	7	22.3	16.7	14.8	70.253	0	23.238	284410000	32	25.5288	25.1715	24.6417	25.3095	25.4	25.3358
	0.775867	-0.952068	Q14671;Q8TB72	Q14671	Pumilio homolog 1	PUM1	Color2 [DarkGray]	1	4					6	6	6	6.6	6.6	6.6	126.47	0	9.4053	84182000	14	23.2324	22.0033	23.6176	23.7011	23.5374	24.471
	1.91546	-0.24522	Q14677	Q14677	Clathrin interactor 1	CLINT1	Color2 [DarkGray]	1	4					13	13	13	22.1	22.1	22.1	68.259	0	46.799	461610000	44	25.7926	25.836	25.9443	26.0851	26.1682	26.0553
	0.139944	0.167541	Q14694	Q14694	Ubiquitin carboxyl-terminal hydrolase 10	USP10	Color2 [DarkGray]	1	4					12	12	12	23.4	23.4	23.4	87.133	0	32.913	323170000	36	26.1003	25.714	24.6663	25.5345	25.1458	25.2977
	0.434067	0.249503	Q14696	Q14696	LDLR chaperone MESD	MESDC2	Color2 [DarkGray]	1	4					9	9	9	37.6	37.6	37.6	26.076	0	36.517	580590000	37	26.3339	26.4508	26.5895	26.3172	25.7586	26.5498
	1.94468	0.224953	Q14697	Q14697	Neutral alpha-glucosidase AB	GANAB	Color2 [DarkGray]	1	4					48	48	48	64.4	64.4	64.4	106.87	0	323.31	13261000000	325	31.059	30.9085	30.935	30.7267	30.7832	30.7178
	0.086097	-0.0453167	Q14738	Q14738	Serine/threonine-protein phosphatase 2A 56 kDa regulatory subunit delta isoform	PPP2R5D	Color2 [DarkGray]	1	4					11	11	7	23.4	23.4	15.1	69.991	0	43.048	585320000	31	26.5526	26.3779	25.9687	26.2452	26.4804	26.3096
	0.929131	-0.323286	Q14764	Q14764	Major vault protein	MVP	Color2 [DarkGray]	1	4					36	36	36	48.7	48.7	48.7	99.326	0	183.79	3835900000	152	28.5366	28.8794	29.0945	29.1519	29.1754	29.1531
	0.0820396	-0.0662607	Q14790	Q14790	Caspase-8;Caspase-8 subunit p18;Caspase-8 subunit p10	CASP8	Color2 [DarkGray]	1	4					7	7	7	18	18	18	55.391	0	49.297	488050000	21	26.5431	26.0498	25.5858	26.1091	26.0111	26.2573
	0.041046	-0.0358143	Q14847	Q14847	LIM and SH3 domain protein 1	LASP1	Color2 [DarkGray]	1	4					17	17	17	62.8	62.8	62.8	29.717	0	99.161	8224200000	87	30.3563	29.604	30.3944	30.3027	29.8577	30.3017
	1.52725	0.242538	Q14974	Q14974	Importin subunit beta-1	KPNB1	Color2 [DarkGray]	1	4					36	36	36	54.9	54.9	54.9	97.169	0	323.31	21543000000	233	31.7058	31.5476	31.7902	31.4721	31.4111	31.4327
	0.117846	0.0690098	Q14978	Q14978	Nucleolar and coiled-body phosphoprotein 1	NOLC1	Color2 [DarkGray]	1	4					6	6	6	8.7	8.7	8.7	73.602	0	16.447	657360000	26	26.308	26.5492	26.8213	26.7013	26.1927	26.5774
	0.198514	-0.118987	Q14997	Q14997	Proteasome activator complex subunit 4	PSME4	Color2 [DarkGray]	1	4					9	9	9	5.6	5.6	5.6	211.33	0	19.988	86120000	15	23.9552	23.9019	23.6229	23.848	23.6472	24.3417
	0.601801	0.214172	Q14CX7	Q14CX7	N-alpha-acetyltransferase 25, NatB auxiliary subunit	NAA25	Color2 [DarkGray]	1	4					12	12	12	14.2	14.2	14.2	112.29	0	31.831	209560000	21	25.2759	25.0213	24.8096	24.9913	24.7428	24.7301
	0.287217	-0.224726	Q15003	Q15003	Condensin complex subunit 2	NCAPH	Color2 [DarkGray]	1	4					10	10	10	17.8	17.8	17.8	82.562	0	35.045	260690000	24	25.4345	25.2669	24.4822	25.3708	25.4322	25.0549
	0.372046	-0.193141	Q15005	Q15005	Signal peptidase complex subunit 2	SPCS2	Color2 [DarkGray]	1	4					6	6	6	27.9	27.9	27.9	25.003	0	35.655	410920000	25	25.4359	25.6539	26.1322	25.9194	26.0627	25.8193
	1.01508	-0.166252	Q15008	Q15008	26S proteasome non-ATPase regulatory subunit 6	PSMD6	Color2 [DarkGray]	1	4					20	20	20	48.8	48.8	48.8	45.531	0	92.637	1578800000	85	27.5344	27.7481	27.7649	27.884	27.8482	27.8141
	0.11215	0.0502733	Q15019	Q15019	Septin-2	2002-09-01	Color2 [DarkGray]	1	4					11	11	11	54.3	54.3	54.3	41.487	0	95.804	1618900000	48	27.6821	27.778	27.9194	27.5777	28.0363	27.6147
	0.0711868	0.0548598	Q15020	Q15020	Squamous cell carcinoma antigen recognized by T-cells 3	SART3	Color2 [DarkGray]	1	4					20	20	20	25.8	25.8	25.8	109.93	0	54.298	361480000	44	25.6453	25.4213	25.8815	25.5181	26.0341	25.2314
	0.755652	-0.096014	Q15021	Q15021	Condensin complex subunit 1	NCAPD2	Color2 [DarkGray]	1	4					28	28	28	25.2	25.2	25.2	157.18	0	96.586	731040000	69	26.6287	26.6262	26.5078	26.7012	26.747	26.6024
	0.335929	0.0731513	Q15029	Q15029	116 kDa U5 small nuclear ribonucleoprotein component	EFTUD2	Color2 [DarkGray]	1	4					32	31	31	40.7	39.7	39.7	109.43	0	190.23	1942400000	113	28.2551	28.0853	27.9797	27.9695	28.0225	28.1086
	1.52774	0.462549	Q15036	Q15036	Sorting nexin-17	SNX17	Color2 [DarkGray]	1	4					7	7	7	20.9	20.9	20.9	52.901	0	54.223	152790000	18	24.6724	24.6352	24.835	24.4091	24.3424	24.0035
	0.120254	-0.0466881	Q15042	Q15042	Rab3 GTPase-activating protein catalytic subunit	RAB3GAP1	Color2 [DarkGray]	1	4					10	10	10	13.4	13.4	13.4	110.52	0	33.306	269470000	28	24.8785	25.2002	25.3347	25.117	25.2603	25.1763
	0.522589	-0.1111	Q15046	Q15046	Lysine--tRNA ligase	KARS	Color2 [DarkGray]	1	4					25	25	25	42.4	42.4	42.4	68.047	0	131.41	3540600000	125	28.7778	28.8287	29.049	29.0762	28.9314	28.9811
	0.586649	-0.192862	Q15056	Q15056	Eukaryotic translation initiation factor 4H	EIF4H	Color2 [DarkGray]	1	4					10	10	10	39.1	39.1	39.1	27.385	0	58.579	1808100000	47	27.8425	27.6054	28.0966	28.0776	27.9658	28.0797
	1.21521	0.577349	Q15075	Q15075	Early endosome antigen 1	EEA1	Color2 [DarkGray]	1	4					21	21	21	19.1	19.1	19.1	162.46	0	59.774	219300000	40	25.0294	25.068	25.5819	24.6849	24.8623	24.4001
	0.210355	0.0570564	Q15084	Q15084	Protein disulfide-isomerase A6	PDIA6	Color2 [DarkGray]	1	4					18	18	18	52.7	52.7	52.7	48.121	0	278.34	12587000000	112	30.9631	30.8168	30.617	30.725	30.8029	30.6978
	0.22153	-0.0517502	Q15102	Q15102	Platelet-activating factor acetylhydrolase IB subunit gamma	PAFAH1B3	Color2 [DarkGray]	1	4					13	13	13	85.7	85.7	85.7	25.734	0	193.14	2377300000	70	28.4827	28.3449	28.1924	28.4082	28.4436	28.3234
	0.332462	-0.953792	Q15121	Q15121	Astrocytic phosphoprotein PEA-15	PEA15	Color2 [DarkGray]	1	4					5	5	5	53.1	53.1	53.1	15.04	0	30.279	536710000	19	26.4777	23.0111	26.6191	26.4553	26.1843	26.3296
	0.566323	-0.439541	Q15126	Q15126	Phosphomevalonate kinase	PMVK	Color2 [DarkGray]	1	4					7	7	7	35.4	35.4	35.4	21.995	0	15.73	152570000	22	24.1209	24.5715	23.4458	24.69	24.4497	24.3172
	0.495592	-0.19135	Q15149;P58107	Q15149	Plectin	PLEC	Color2 [DarkGray]	1	4					166	166	165	39.7	39.7	39.5	531.78	0	323.31	8735000000	562	30.1685	29.9397	30.1822	30.1764	30.5832	30.1049
	1.48916	-0.628685	Q15154	Q15154	Pericentriolar material 1 protein	PCM1	Color2 [DarkGray]	1	4					9	9	9	5.9	5.9	5.9	228.53	0	20.917	1182100000	21	26.4273	26.8736	26.8251	27.224	27.6063	27.1817
	0.888013	0.220741	Q15165	Q15165	Serum paraoxonase/arylesterase 2	PON2	Color2 [DarkGray]	1	4					9	9	9	36.2	36.2	36.2	39.396	0	144.99	3932800000	78	29.3604	29.0673	29.2268	29.0003	29.1328	28.8591
	0.946955	0.217467	Q15181	Q15181	Inorganic pyrophosphatase	PPA1	Color2 [DarkGray]	1	4					20	20	20	75.4	75.4	75.4	32.66	0	217.51	6975900000	131	30.0895	30.1135	29.9012	29.6721	29.9628	29.817
	0.822658	-0.149972	Q15185	Q15185	Prostaglandin E synthase 3	PTGES3	Color2 [DarkGray]	1	4					10	10	10	60.6	60.6	60.6	18.697	0	74.18	5739900000	57	29.612	29.497	29.4825	29.5701	29.8207	29.6508
	0.654989	-0.354615	Q15233	Q15233	Non-POU domain-containing octamer-binding protein	NONO	Color2 [DarkGray]	1	4					14	14	13	30.8	30.8	29.1	54.231	0	36.458	543880000	43	25.861	25.7179	26.4095	26.1021	26.4539	26.4962
	1.79275	0.414358	Q15257	Q15257	Serine/threonine-protein phosphatase 2A activator	PPP2R4	Color2 [DarkGray]	1	4					10	10	10	36.9	36.9	36.9	40.667	0	41.189	538920000	37	26.6139	26.2707	26.4124	26.0343	26.0572	25.9624
	0.00930005	-0.0114962	Q15287	Q15287	RNA-binding protein with serine-rich domain 1	RNPS1	Color2 [DarkGray]	1	4					3	3	3	11.8	11.8	11.8	34.208	0	11.644	83232000	11	23.7283	23.8441	23.1227	22.9685	24.1438	23.6173
	0.159859	-0.0736688	Q15293	Q15293	Reticulocalbin-1	RCN1	Color2 [DarkGray]	1	4					12	12	12	39.9	39.9	39.9	38.89	0	165.87	3698300000	83	28.6885	29.0868	29.0984	29.0734	29.1949	28.8264
	0.195244	-0.0364641	Q15365;P57723	Q15365	Poly(rC)-binding protein 1	PCBP1	Color2 [DarkGray]	1	4					16	16	12	77.8	77.8	64.6	37.497	0	323.31	7672700000	104	30.1892	30.0309	29.9471	30.0719	30.1054	30.0994
	0.828125	-0.187244	Q15366	Q15366	Poly(rC)-binding protein 2	PCBP2	Color2 [DarkGray]	1	4					14	10	9	51	38.1	34.2	38.58	0	137.16	2563000000	42	28.4521	28.2614	28.3894	28.5892	28.6881	28.3873
	1.65612	-0.365416	Q15369	Q15369	Transcription elongation factor B polypeptide 1	TCEB1	Color2 [DarkGray]	1	4					6	6	6	65.2	65.2	65.2	12.473	0	29.363	1354500000	43	27.5148	27.2188	27.3701	27.8365	27.6607	27.7028
	1.321	-0.588679	Q15370	Q15370	Transcription elongation factor B polypeptide 2	TCEB2	Color2 [DarkGray]	1	4					10	10	10	59.3	59.3	59.3	13.133	0	35.277	1300300000	44	26.8969	27.5167	26.9675	27.8261	27.74	27.581
	0.818263	-0.347242	Q15382	Q15382	GTP-binding protein Rheb	RHEB	Color2 [DarkGray]	1	4					6	6	6	20.7	20.7	20.7	20.497	0	15.057	249010000	22	24.9482	24.8315	24.8997	24.8758	25.31	25.5354
	0.465092	-0.17428	Q15393	Q15393	Splicing factor 3B subunit 3	SF3B3	Color2 [DarkGray]	1	4					24	24	24	24.2	24.2	24.2	135.58	0	121.25	1603100000	86	27.8142	27.7433	27.4332	27.7465	28.0608	27.7062
	0.169891	-0.0553621	Q15417	Q15417	Calponin-3	CNN3	Color2 [DarkGray]	1	4					8	7	7	33.1	29.8	29.8	36.413	0	42.847	950830000	41	27.0893	26.8455	26.9991	27.0722	26.8431	27.1846
	0.606676	-0.725375	Q15427	Q15427	Splicing factor 3B subunit 4	SF3B4	Color2 [DarkGray]	1	4					3	3	3	13.7	13.7	13.7	44.385	0	36.193	247560000	12	24.7643	25.3487	23.5315	25.2737	25.3072	25.2398
	0.264751	-0.174233	Q15435	Q15435	Protein phosphatase 1 regulatory subunit 7	PPP1R7	Color2 [DarkGray]	1	4					8	8	8	29.7	29.7	29.7	41.564	0	42.7	342890000	29	25.2228	25.3419	25.929	25.6335	25.9427	25.4402
	0.501384	-0.159702	Q15436	Q15436	Protein transport protein Sec23A	SEC23A	Color2 [DarkGray]	1	4					14	14	13	25.2	25.2	23.9	86.16	0	92.396	718420000	47	26.412	26.7816	26.3312	26.6465	26.6672	26.6902
	0.0938669	0.0313816	Q15459	Q15459	Splicing factor 3A subunit 1	SF3A1	Color2 [DarkGray]	1	4					19	19	19	28.5	28.5	28.5	88.885	0	44.216	787310000	51	26.6075	26.8938	26.9942	26.7503	26.8008	26.8502
	0.86249	0.984451	Q15629	Q15629	Translocating chain-associated membrane protein 1	TRAM1	Color2 [DarkGray]	1	4					3	3	3	8.6	8.6	8.6	43.071	0	21.525	358660000	17	24.9384	26.3332	26.6546	25.0163	25.0901	24.8665
	0.532919	-0.192773	Q15631	Q15631	Translin	TSN	Color2 [DarkGray]	1	4					11	11	11	42.1	42.1	42.1	26.183	0	85.276	1348200000	54	27.5001	27.5657	27.1752	27.6765	27.4015	27.7412
	1.0453	0.746037	Q15637	Q15637	Splicing factor 1	SF1	Color2 [DarkGray]	1	4					8	8	8	17.5	17.5	17.5	68.329	0	33.111	298120000	18	25.8525	25.2546	25.7228	25.2924	24.9669	24.3325
	0.166568	0.0457128	Q15645	Q15645	Pachytene checkpoint protein 2 homolog	TRIP13	Color2 [DarkGray]	1	4					11	11	11	27.3	27.3	27.3	48.55	0	35.593	428870000	38	26.0352	25.9826	25.7654	25.761	25.9686	25.9165
	0.254047	0.0793559	Q15691	Q15691	Microtubule-associated protein RP/EB family member 1	MAPRE1	Color2 [DarkGray]	1	4					13	13	12	54.5	54.5	54.5	29.999	0	126.47	2495900000	75	28.4329	28.4384	28.6809	28.2599	28.4792	28.5751
	0.119389	-0.144155	Q15717	Q15717	ELAV-like protein 1	ELAVL1	Color2 [DarkGray]	1	4					4	4	4	14.1	14.1	14.1	36.091	0	14.846	145720000	18	24.2119	24.6815	23.5384	23.8484	24.8331	24.1827
	0.594658	0.153354	Q15738	Q15738	Sterol-4-alpha-carboxylate 3-dehydrogenase, decarboxylating	NSDHL	Color2 [DarkGray]	1	4					12	12	12	40.5	40.5	40.5	41.9	0	91.194	749870000	41	26.8544	26.5876	26.9051	26.6598	26.7141	26.5131
	0.0139389	-0.00410144	Q15758	Q15758	Neutral amino acid transporter B(0)	SLC1A5	Color2 [DarkGray]	1	4					7	7	7	17.2	17.2	17.2	56.598	0	104.33	732490000	25	26.7768	26.5833	26.6466	26.521	26.7861	26.712
	0.905235	0.244825	Q15813	Q15813	Tubulin-specific chaperone E	TBCE	Color2 [DarkGray]	1	4					9	9	9	19.5	19.5	19.5	59.345	0	33.946	385110000	28	26.1004	25.7734	25.8456	25.5566	25.6142	25.8141
	0.608587	0.777439	Q15836;P63027;P23763	Q15836;P63027	Vesicle-associated membrane protein 3;Vesicle-associated membrane protein 2	VAMP3;VAMP2	Color2 [DarkGray]	1	4					4	4	4	41	41	41	11.309	0	31.258	263280000	14	25.527	25.4921	25.3946	23.5656	25.0995	25.4164
	1.28573	-0.450254	Q15843	Q15843	NEDD8	NEDD8	Color2 [DarkGray]	1	4					2	2	2	34.6	34.6	34.6	9.0714	0	25.552	933290000	19	26.4261	26.8355	26.9347	27.166	27.2798	27.1011
	0.826919	0.171638	Q15907;P62491;P57735	Q15907;P62491	Ras-related protein Rab-11B;Ras-related protein Rab-11A	RAB11B;RAB11A	Color2 [DarkGray]	1	4					13	13	13	57.3	57.3	57.3	24.488	0	96.544	2311100000	46	28.55	28.4367	28.4153	28.3568	28.4056	28.1247
	0.753832	0.318883	Q15942	Q15942	Zyxin	ZYX	Color2 [DarkGray]	1	4					20	20	20	54.4	54.4	54.4	61.277	0	168.51	2339600000	102	28.2866	28.51	28.7497	28.4414	27.9527	28.1956
	0.233675	0.147526	Q16181;Q6ZU15	Q16181	Septin-7	2007-09-01	Color2 [DarkGray]	1	4					11	11	11	33.6	33.6	33.6	50.679	0	63.977	829400000	39	27.0981	26.6396	26.7015	26.5616	27.0558	26.3792
	0.40346	-1.49417	Q16186	Q16186	Proteasomal ubiquitin receptor ADRM1	ADRM1	Color2 [DarkGray]	1	4					5	5	5	13.8	13.8	13.8	42.153	0	30.546	412290000	15	26.2572	25.5915	21.3198	26.1469	25.3547	26.1495
	1.57662	0.463401	Q16204	Q16204	Coiled-coil domain-containing protein 6	CCDC6	Color2 [DarkGray]	1	4					11	11	11	31	31	31	53.29	0	81.513	574770000	41	26.5227	26.6573	26.5078	26.2065	25.8473	26.2438
	0.0467905	-0.0196749	Q16401	Q16401	26S proteasome non-ATPase regulatory subunit 5	PSMD5	Color2 [DarkGray]	1	4					18	18	18	42.7	42.7	42.7	56.195	0	90.736	1806900000	67	28.1568	27.9139	27.7231	27.9449	28.0759	27.8321
	0.0342241	0.0160828	Q16531	Q16531	DNA damage-binding protein 1	DDB1	Color2 [DarkGray]	1	4					31	31	31	32.2	32.2	32.2	126.97	0	111.51	1577500000	129	27.9706	27.751	27.5194	27.7161	27.8952	27.5815
	0.217851	0.133807	Q16543	Q16543	Hsp90 co-chaperone Cdc37;Hsp90 co-chaperone Cdc37, N-terminally processed	CDC37	Color2 [DarkGray]	1	4					14	14	14	38.4	38.4	38.4	44.468	0	94.458	1437400000	53	27.9077	27.5021	27.7088	27.6832	27.1689	27.865
	0.951969	-0.0921008	Q16555;Q14194	Q16555	Dihydropyrimidinase-related protein 2	DPYSL2	Color2 [DarkGray]	1	4					28	28	24	73.3	73.3	64.3	62.293	0	323.31	10225000000	195	30.4211	30.4794	30.3829	30.4551	30.527	30.5776
	0.318939	-0.0622997	Q16576	Q16576	Histone-binding protein RBBP7	RBBP7	Color2 [DarkGray]	1	4					12	12	8	52.9	52.9	44.5	47.82	0	120.47	1480600000	46	27.7029	27.6265	27.6332	27.6067	27.863	27.6799
	0.200365	0.193865	Q16630	Q16630	Cleavage and polyadenylation specificity factor subunit 6	CPSF6	Color2 [DarkGray]	1	4					6	6	6	16.5	16.5	16.5	59.209	0	44.58	237170000	22	25.5635	25.1497	24.4589	24.9368	25.1451	24.5086
	0.0171826	0.0118033	Q16643	Q16643	Drebrin	DBN1	Color2 [DarkGray]	1	4					16	16	16	29.3	29.3	29.3	71.428	0	78.901	988090000	46	27.3589	26.6871	27.342	27.1329	27.2055	27.0143
	1.70362	0.310255	Q16658	Q16658	Fascin	FSCN1	Color2 [DarkGray]	1	4					24	24	24	58.2	58.2	58.2	54.529	0	184.44	7106900000	138	30.0742	30.047	30.243	29.9064	29.715	29.812
	0.0328365	0.022042	Q16698	Q16698	2,4-dienoyl-CoA reductase, mitochondrial	DECR1	Color2 [DarkGray]	1	4					8	8	8	34	34	34	36.067	0	48.92	430480000	25	25.7233	26.0862	25.8506	25.9374	26.1691	25.4876
	1.1792	0.196313	Q16719	Q16719	Kynureninase	KYNU	Color2 [DarkGray]	1	4					26	26	26	61.5	61.5	61.5	52.351	0	323.31	14106000000	202	31.1129	30.9188	31.1755	30.8938	30.8508	30.8736
	0.028697	-0.0257835	Q16762	Q16762	Thiosulfate sulfurtransferase	TST	Color2 [DarkGray]	1	4					7	7	7	28.3	28.3	28.3	33.429	0	27.029	255150000	25	25.3765	25.2443	24.7104	24.8288	25.5698	25.01
	0.0479638	-0.0595633	Q16822	Q16822	Phosphoenolpyruvate carboxykinase [GTP], mitochondrial	PCK2	Color2 [DarkGray]	1	4					7	7	7	11.6	11.6	11.6	70.729	0	13.29	84649000	13	24.049	23.673	23.9007	23.1126	24.3056	24.3832
	0.16855	-0.414654	Q16836	Q16836	Hydroxyacyl-coenzyme A dehydrogenase, mitochondrial	HADH	Color2 [DarkGray]	1	4					7	7	7	28.3	28.3	28.3	34.293	0	22.641	375480000	18	26.2996	25.9691	23.4231	25.8442	25.8289	25.2627
	0.32299	-0.168803	Q16851	Q16851	UTP--glucose-1-phosphate uridylyltransferase	UGP2	Color2 [DarkGray]	1	4					21	21	21	46.3	46.3	46.3	56.94	0	158.8	2443300000	78	28.3694	28.0863	28.458	28.703	28.1119	28.6052
	0.173026	0.0251363	Q16881;Q9NNW7	Q16881	Thioredoxin reductase 1, cytoplasmic	TXNRD1	Color2 [DarkGray]	1	4					23	23	23	45.5	45.5	45.5	70.905	0	233.22	4016600000	138	29.0549	29.2312	29.1444	29.148	29.0782	29.1289
	0.0235449	-0.0567576	Q16891	Q16891	MICOS complex subunit MIC60	IMMT	Color2 [DarkGray]	1	4					8	8	8	14.9	14.9	14.9	83.677	0	22.646	108970000	18	24.2671	24.5924	22.4277	24.0402	24.4495	22.9678
	0.42641	0.669909	Q1KMD3	Q1KMD3	Heterogeneous nuclear ribonucleoprotein U-like protein 2	HNRNPUL2	Color2 [DarkGray]	1	4					5	5	5	10.2	10.2	10.2	85.104	0	29.734	162300000	16	24.8623	24.8355	24.4079	24.7391	22.7241	24.6328
	0.114957	0.0429579	Q27J81	Q27J81	Inverted formin-2	INF2	Color2 [DarkGray]	1	4					21	21	21	23.2	23.2	23.2	135.62	0	135.6	859420000	52	27.0258	26.6816	26.8769	26.7427	27.0019	26.711
	0.671524	-0.261004	Q2NL82	Q2NL82	Pre-rRNA-processing protein TSR1 homolog	TSR1	Color2 [DarkGray]	1	4					15	15	15	26	26	26	91.809	0	74.462	513260000	42	26.0918	26.0301	25.6418	26.1616	26.3756	26.0096
	0.0315438	-0.0673129	Q2TAY7	Q2TAY7	WD40 repeat-containing protein SMU1;WD40 repeat-containing protein SMU1, N-terminally processed	SMU1	Color2 [DarkGray]	1	4					7	7	7	16	16	16	57.543	0	19.074	167570000	20	24.9331	24.4289	23.4735	24.3663	25.3367	23.3344
	0.856946	0.17298	Q32MZ4	Q32MZ4	Leucine-rich repeat flightless-interacting protein 1	LRRFIP1	Color2 [DarkGray]	1	4					13	13	12	21.5	21.5	20	89.252	0	49.174	527360000	40	26.1958	26.4009	26.2489	26.1327	25.9759	26.2181
	0.13564	0.101568	Q3LXA3	Q3LXA3	Bifunctional ATP-dependent dihydroxyacetone kinase/FAD-AMP lyase (cyclizing);ATP-dependent dihydroxyacetone kinase;FAD-AMP lyase (cyclizing)	DAK	Color2 [DarkGray]	1	4					11	11	11	23.7	23.7	23.7	58.946	0	30.224	242210000	28	25.5342	24.9226	24.9729	25.1843	25.2841	24.6567
	1.38191	0.515157	Q3ZCM7	Q3ZCM7	Tubulin beta-8 chain	TUBB8	Color2 [DarkGray]	1	4					11	2	2	24.5	7.4	7.4	49.775	0	200.4	11454000000	15	31.0837	30.5328	30.9979	30.4146	30.3469	30.3074
	0.932964	0.412127	Q3ZCQ8	Q3ZCQ8	Mitochondrial import inner membrane translocase subunit TIM50	TIMM50	Color2 [DarkGray]	1	4					8	8	8	32	32	32	39.646	0	71.614	722550000	28	26.9786	26.6844	26.9137	26.4424	26.7715	26.1264
	0.308213	-0.102261	Q4VC31	Q4VC31	Coiled-coil domain-containing protein 58	CCDC58	Color2 [DarkGray]	1	4					5	5	5	45.1	45.1	45.1	16.62	0	26.691	214960000	21	24.6006	24.9861	24.8453	24.8167	25.0606	24.8615
	0.6407	-0.231622	Q53FA7	Q53FA7	Quinone oxidoreductase PIG3	TP53I3	Color2 [DarkGray]	1	4					12	12	12	47	47	47	35.536	0	181.14	3170600000	61	28.355	28.8416	28.7626	28.8235	29.0093	28.8212
	0.450722	0.129045	Q53GQ0	Q53GQ0	Very-long-chain 3-oxoacyl-CoA reductase	HSD17B12	Color2 [DarkGray]	1	4					12	12	12	37.8	37.8	37.8	34.324	0	62.276	1433900000	45	27.7596	27.7806	27.4917	27.5069	27.7044	27.4335
	1.86937	-0.3926	Q53H82	Q53H82	Beta-lactamase-like protein 2	LACTB2	Color2 [DarkGray]	1	4					13	13	13	58.7	58.7	58.7	32.805	0	59.563	1221700000	53	27.3382	27.0912	27.0427	27.5376	27.5839	27.5285
	1.02437	0.296095	Q58FF8	Q58FF8	Putative heat shock protein HSP 90-beta 2	HSP90AB2P	Color2 [DarkGray]	1	4					12	1	1	22.6	3.9	3.9	44.348	0	30.714	2361200000	23	28.7727	28.339	28.4239	28.2269	28.2584	28.162
	0.495587	-0.201487	Q5JRX3	Q5JRX3	Presequence protease, mitochondrial	PITRM1	Color2 [DarkGray]	1	4					17	17	17	21.9	21.9	21.9	117.41	0	53.422	605820000	66	26.53	26.1923	26.0112	26.4825	26.5829	26.2726
	0.220762	0.358482	Q5T1M5	Q5T1M5	FK506-binding protein 15	FKBP15	Color2 [DarkGray]	1	4					8	8	8	7.5	7.5	7.5	133.63	0	14.412	87302000	14	23.8871	23.8771	23.6703	23.9193	24.2321	22.2077
	1.05675	0.116315	Q5T4S7	Q5T4S7	E3 ubiquitin-protein ligase UBR4	UBR4	Color2 [DarkGray]	1	4					60	60	60	14.5	14.5	14.5	573.83	0	156.42	1351600000	175	27.6938	27.6285	27.5769	27.5211	27.5822	27.4469
	0.714996	-0.750272	Q5VWZ2	Q5VWZ2	Lysophospholipase-like protein 1	LYPLAL1	Color2 [DarkGray]	1	4					6	6	6	32.9	32.9	32.9	26.316	0	18.289	162400000	16	24.6712	24.3757	23.1267	24.9596	24.7566	24.7081
	0.0166777	-0.00739606	Q5VYK3	Q5VYK3	Proteasome-associated protein ECM29 homolog	ECM29	Color2 [DarkGray]	1	4					29	29	29	20.6	20.6	20.6	204.29	0	88.836	615600000	69	26.2218	26.7167	26.4018	26.4667	26.4938	26.402
	0.543562	-0.215504	Q63HN8	Q63HN8	E3 ubiquitin-protein ligase RNF213	RNF213	Color2 [DarkGray]	1	4					71	71	71	16.1	16.1	16.1	591.4	0	186.59	1119300000	159	27.3801	27.2474	26.8527	27.3245	27.523	27.2793
	0.671853	0.156138	Q68CZ2;Q63HR2;Q9HBL0	Q68CZ2	Tensin-3	TNS3	Color2 [DarkGray]	1	4					23	23	23	27.1	27.1	27.1	155.26	0	117.45	1349100000	82	27.7887	27.6038	27.4593	27.5179	27.4935	27.3719
	0.4327	-0.15193	Q6DD88	Q6DD88	Atlastin-3	ATL3	Color2 [DarkGray]	1	4					10	10	10	27	27	27	60.541	0	54.434	1270700000	48	27.4221	27.4504	27.1692	27.3093	27.7235	27.4647
	0.673261	0.790534	Q6GMV2	Q6GMV2	SET and MYND domain-containing protein 5	SMYD5	Color2 [DarkGray]	1	4					5	5	5	18.2	18.2	18.2	47.34	0	11.07	142150000	12	24.82	24.3877	24.3759	24.5109	23.9332	22.7679
	0.158325	-0.0513541	Q6GMV3	Q6GMV3	Putative peptidyl-tRNA hydrolase PTRHD1	PTRHD1	Color2 [DarkGray]	1	4					6	6	6	49.3	49.3	49.3	15.805	0	25.223	254110000	12	25.0342	25.149	25.2759	25.3951	25.0592	25.1589
	0.277886	0.16667	Q6IAA8	Q6IAA8	Ragulator complex protein LAMTOR1	LAMTOR1	Color2 [DarkGray]	1	4					5	5	5	46	46	46	17.745	0	26.018	338230000	26	25.9319	25.7928	25.1627	25.388	25.5465	25.4529
	0.165585	-0.0507425	Q6IBS0	Q6IBS0	Twinfilin-2	TWF2	Color2 [DarkGray]	1	4					15	15	13	65	65	61	39.548	0	160.66	1334000000	71	27.6974	27.4712	27.3343	27.4597	27.6015	27.5939
	0.203981	0.111133	Q6L8Q7	Q6L8Q7	2,5-phosphodiesterase 12	PDE12	Color2 [DarkGray]	1	4					6	6	6	15.8	15.8	15.8	67.351	0	10.981	67827000	13	23.3351	23.4457	23.7015	23.1636	23.7403	23.245
	1.0502	0.307225	Q6NVY1	Q6NVY1	3-hydroxyisobutyryl-CoA hydrolase, mitochondrial	HIBCH	Color2 [DarkGray]	1	4					6	6	6	18.9	18.9	18.9	43.482	0	23.724	289150000	29	25.4944	25.6066	25.4564	25.0339	25.1372	25.4646
	1.27957	-0.222225	Q6NYC1	Q6NYC1	Bifunctional arginine demethylase and lysyl-hydroxylase JMJD6	JMJD6	Color2 [DarkGray]	1	4					8	8	8	30.8	30.8	30.8	46.461	0	37.52	432930000	34	25.9299	25.6963	25.7132	25.9399	26.0268	26.0394
	1.1808	-0.219671	Q6NZI2	Q6NZI2	Polymerase I and transcript release factor	PTRF	Color2 [DarkGray]	1	4					14	14	14	36.2	36.2	36.2	43.476	0	130.77	2876400000	84	28.3743	28.6272	28.5546	28.8226	28.7221	28.6703
	0.880332	-0.307096	Q6P1J9	Q6P1J9	Parafibromin	CDC73	Color2 [DarkGray]	1	4					4	4	4	7.7	7.7	7.7	60.576	0	10.232	152170000	15	24.198	24.2151	24.033	24.3572	24.7537	24.2565
	0.525183	-0.194254	Q6P1L8	Q6P1L8	39S ribosomal protein L14, mitochondrial	MRPL14	Color2 [DarkGray]	1	4					3	3	3	26.2	26.2	26.2	15.947	0	7.9926	111420000	15	24.1374	23.8247	23.6001	23.959	24.1178	24.0682
	0.789587	-0.212806	Q6P1N9	Q6P1N9	Putative deoxyribonuclease TATDN1	TATDN1	Color2 [DarkGray]	1	4					6	6	6	26.3	26.3	26.3	33.601	0	18.295	226380000	17	24.6303	24.8475	25.0136	24.9328	25.1169	25.0801
	0.340039	0.114229	Q6P2E9	Q6P2E9	Enhancer of mRNA-decapping protein 4	EDC4	Color2 [DarkGray]	1	4					19	19	19	21.3	21.3	21.3	151.66	0	83.827	594960000	61	26.6663	26.3275	26.2736	26.4144	26.3192	26.1911
	0.502518	-0.109568	Q6P2Q9	Q6P2Q9	Pre-mRNA-processing-splicing factor 8	PRPF8	Color2 [DarkGray]	1	4					48	48	48	25.5	25.5	25.5	273.6	0	176.17	2018200000	171	28.0845	28.11	27.9402	28.1175	28.3065	28.0394
	0.0841413	-0.0893485	Q6P9B6	Q6P9B6	TLD domain-containing protein 1	TLDC1	Color2 [DarkGray]	1	4					6	6	6	16.9	16.9	16.9	50.993	0	21.406	260600000	18	25.6985	24.4206	25.2593	25.2675	25.2146	25.1643
	0.474061	0.219779	Q6PI48	Q6PI48	Aspartate--tRNA ligase, mitochondrial	DARS2	Color2 [DarkGray]	1	4					13	13	13	29.6	29.6	29.6	73.562	0	72.895	513340000	32	26.3877	26.4135	26.0055	25.7487	26.2358	26.1629
	0.2004	0.0642357	Q6PIU2	Q6PIU2	Neutral cholesterol ester hydrolase 1	NCEH1	Color2 [DarkGray]	1	4					8	8	8	21.8	21.8	21.8	45.807	0	21.117	358320000	25	25.7671	25.5227	25.8068	25.8022	25.5826	25.5191
	0.939926	-0.243409	Q6PKG0;Q659C4	Q6PKG0	La-related protein 1	LARP1	Color2 [DarkGray]	1	4					19	19	19	26.3	26.3	26.3	123.51	0	65.801	568310000	51	26.1752	26.2984	26.037	26.3738	26.2732	26.5939
	0.506261	-0.1414	Q6PUV4	Q6PUV4	Complexin-2	CPLX2	Color2 [DarkGray]	1	4					5	5	5	48.5	48.5	48.5	15.394	0	31.419	1158100000	21	27.2947	27.3057	27.1934	27.5664	27.473	27.1786
	0.102276	0.0168235	Q6UB35	Q6UB35	Monofunctional C1-tetrahydrofolate synthase, mitochondrial	MTHFD1L	Color2 [DarkGray]	1	4					10	10	10	13.5	13.5	13.5	105.79	0	25.373	169140000	16	24.5537	24.5639	24.5656	24.4276	24.6181	24.5871
	0.647857	0.223286	Q6Y7W6	Q6Y7W6	PERQ amino acid-rich with GYF domain-containing protein 2	GIGYF2	Color2 [DarkGray]	1	4					5	5	5	5.2	5.2	5.2	150.07	0	12.223	103650000	15	23.7205	24.0454	24.1914	23.6833	23.7023	23.9019
	0.145021	0.0975736	Q6YHK3	Q6YHK3	CD109 antigen	CD109	Color2 [DarkGray]	1	4					10	10	10	10.3	10.3	10.3	161.69	0	23.847	138460000	22	24.3886	24.3773	24.5828	24.0128	24.8178	24.2254
	1.66703	-0.263556	Q6YN16	Q6YN16	Hydroxysteroid dehydrogenase-like protein 2	HSDL2	Color2 [DarkGray]	1	4					9	9	9	27	27	27	45.394	0	39.374	509300000	32	25.9392	25.981	26.0402	26.2739	26.3506	26.1266
	0.459825	0.511311	Q6ZRP7	Q6ZRP7	Sulfhydryl oxidase 2	QSOX2	Color2 [DarkGray]	1	4					3	3	3	8.5	8.5	8.5	77.528	0	12.891	99434000	11	22.8426	24.068	24.0095	23.3839	22.5951	23.4072
	0.0861629	-0.0369841	Q709C8	Q709C8	Vacuolar protein sorting-associated protein 13C	VPS13C	Color2 [DarkGray]	1	4					14	14	14	4.8	4.8	4.8	422.39	0	30.92	157140000	27	24.1733	24.6896	24.4161	24.5092	24.4046	24.4761
	0.128948	-0.0904191	Q70UQ0	Q70UQ0	Inhibitor of nuclear factor kappa-B kinase-interacting protein	IKBIP	Color2 [DarkGray]	1	4					9	9	9	24.6	24.6	24.6	39.309	0	25.297	266300000	26	25.2485	25.3466	24.7938	25.0153	25.6059	25.0389
	0.402654	0.173232	Q71U36;Q13748;Q6PEY2	Q71U36;Q13748;Q6PEY2	Tubulin alpha-1A chain;Tubulin alpha-3C/D chain;Tubulin alpha-3E chain	TUBA1A;TUBA3C;TUBA3E	Color2 [DarkGray]	1	4					33	2	1	78	6	3.1	50.135	0	24.842	4242100000	16	29.4048	29.2665	29.2654	29.4355	28.8255	29.1561
	0.397855	0.0967827	Q7KZF4	Q7KZF4	Staphylococcal nuclease domain-containing protein 1	SND1	Color2 [DarkGray]	1	4					37	37	37	55.6	55.6	55.6	102	0	323.31	4828700000	169	29.4416	29.5085	29.4437	29.3066	29.5642	29.2326
	1.877	-0.35018	Q7L014	Q7L014	Probable ATP-dependent RNA helicase DDX46	DDX46	Color2 [DarkGray]	1	4					23	23	23	25.8	25.8	25.8	117.36	0	75.238	817520000	84	26.4979	26.7203	26.5764	26.9863	27.0112	26.8477
	0.36809	-0.793442	Q7L0Y3	Q7L0Y3	Mitochondrial ribonuclease P protein 1	TRMT10C	Color2 [DarkGray]	1	4					11	11	11	36.5	36.5	36.5	47.346	0	27.168	235400000	20	25.0048	25.0558	22.4046	24.708	25.3779	24.7597
	0.264399	0.134208	Q7L2H7	Q7L2H7	Eukaryotic translation initiation factor 3 subunit M	EIF3M	Color2 [DarkGray]	1	4					11	11	11	35.3	35.3	35.3	42.502	0	86.657	2845600000	64	28.9577	28.3303	28.7817	28.6693	28.5926	28.4051
	0.375246	0.20979	Q7L576;Q96F07	Q7L576;Q96F07	Cytoplasmic FMR1-interacting protein 1;Cytoplasmic FMR1-interacting protein 2	CYFIP1;CYFIP2	Color2 [DarkGray]	1	4					10	10	10	9.2	9.2	9.2	145.18	0	37.18	427450000	31	26.2355	25.4663	26.0629	25.7602	25.7036	25.6716
	0.254746	-0.14102	Q7RTV0	Q7RTV0	PHD finger-like domain-containing protein 5A	PHF5A	Color2 [DarkGray]	1	4					5	5	5	54.5	54.5	54.5	12.405	0	14.235	158220000	20	24.2227	24.5921	24.3736	24.6943	24.1551	24.7619
	0.538822	-0.874293	Q7Z2K6	Q7Z2K6	Endoplasmic reticulum metallopeptidase 1	ERMP1	Color2 [DarkGray]	1	4					7	7	7	9.2	9.2	9.2	100.23	0	18.315	71352000	13	21.441	23.5672	23.5424	23.5749	23.6199	23.9787
	0.542591	-0.126752	Q7Z2W4;Q9H0J9	Q7Z2W4	Zinc finger CCCH-type antiviral protein 1	ZC3HAV1	Color2 [DarkGray]	1	4					18	18	18	27.3	27.3	27.3	101.43	0	126.01	816630000	70	26.7567	26.8453	26.7089	26.9181	27.0503	26.7227
	1.81631	0.213312	Q7Z2Z2	Q7Z2Z2	Elongation factor Tu GTP-binding domain-containing protein 1	EFTUD1	Color2 [DarkGray]	1	4					14	14	14	18.3	18.3	18.3	125.43	0	62.825	434490000	39	26.0215	26.0731	25.9245	25.7441	25.7898	25.8451
	2.01107	0.187534	Q7Z4S6;Q2M1P5;Q86VH2;O75037	Q7Z4S6	Kinesin-like protein KIF21A	KIF21A	Color2 [DarkGray]	1	4					9	9	9	6.7	6.7	6.7	187.18	0	16.463	113280000	22	24.0897	24.1578	24.0501	23.8616	23.9291	23.9442
	0.426217	0.0562057	Q7Z6Z7	Q7Z6Z7	E3 ubiquitin-protein ligase HUWE1	HUWE1	Color2 [DarkGray]	1	4					51	51	51	15	15	15	481.89	0	168.7	2197500000	142	28.2887	28.2502	28.3063	28.2842	28.2743	28.118
	0.42394	-0.339759	Q86SF2	Q86SF2	N-acetylgalactosaminyltransferase 7	GALNT7	Color2 [DarkGray]	1	4					7	7	7	14.2	14.2	14.2	75.388	0	20.918	112960000	17	23.9379	24.2356	23.1237	24.0707	24.2597	23.986
	0.600582	-0.382597	Q86TI2	Q86TI2	Dipeptidyl peptidase 9	DPP9	Color2 [DarkGray]	1	4					11	11	11	14.9	14.9	14.9	98.262	0	36.967	262310000	37	25.121	25.2304	24.4204	25.1306	25.2282	25.5608
	0.626583	-0.253433	Q86TX2;P49753	Q86TX2;P49753	Acyl-coenzyme A thioesterase 1;Acyl-coenzyme A thioesterase 2, mitochondrial	ACOT1;ACOT2	Color2 [DarkGray]	1	4					13	13	13	34.4	34.4	34.4	46.277	0	41.422	516410000	36	25.6308	26.21	26.0252	26.2895	26.2521	26.0848
	0.975261	0.15075	Q86UP2	Q86UP2	Kinectin	KTN1	Color2 [DarkGray]	1	4					35	35	35	31.9	31.9	31.9	156.27	0	138.88	1804200000	112	28.1377	27.949	28.0901	27.9469	27.9594	27.8182
	0.784181	-0.340403	Q86V81	Q86V81	THO complex subunit 4	ALYREF	Color2 [DarkGray]	1	4					8	8	8	36.2	36.2	36.2	26.888	0	44.035	590710000	32	26.429	26.1422	25.7902	26.6068	26.4322	26.3436
	0.826823	-0.0799548	Q86VP6	Q86VP6	Cullin-associated NEDD8-dissociated protein 1	CAND1	Color2 [DarkGray]	1	4					44	44	40	41.7	41.7	38.6	136.37	0	323.31	6059100000	207	29.6992	29.7323	29.636	29.7148	29.7586	29.8339
	0.307123	-0.141959	Q86X55	Q86X55	Histone-arginine methyltransferase CARM1	CARM1	Color2 [DarkGray]	1	4					7	7	7	14.8	14.8	14.8	65.853	0	18.112	221850000	22	24.7734	25.3043	24.761	25.2037	25.0469	25.014
	1.15332	0.226031	Q86XP3	Q86XP3	ATP-dependent RNA helicase DDX42	DDX42	Color2 [DarkGray]	1	4					12	12	12	18.7	18.7	18.7	102.97	0	62.566	400070000	24	25.9071	26.0333	25.8278	25.8368	25.6311	25.6222
	0.410024	-0.076999	Q86Y56	Q86Y56	Dynein assembly factor 5, axonemal	DNAAF5	Color2 [DarkGray]	1	4					11	11	11	15.8	15.8	15.8	93.52	0	46.154	373630000	44	25.7046	25.6065	25.6133	25.7203	25.8444	25.5908
	0.418609	-0.194325	Q8IV08	Q8IV08	Phospholipase D3	PLD3	Color2 [DarkGray]	1	4					6	6	6	14.5	14.5	14.5	54.705	0	24.599	427550000	32	25.9381	25.9212	25.5018	25.7569	26.2294	25.9578
	0.156526	0.0436389	Q8IVF2	Q8IVF2	Protein AHNAK2	AHNAK2	Color2 [DarkGray]	1	4					30	30	30	19	19	19	616.62	0	91.425	916810000	91	26.925	26.9453	27.0772	26.791	27.1101	26.9155
	0.307948	0.17694	Q8IVT2	Q8IVT2	Mitotic interactor and substrate of PLK1	MISP	Color2 [DarkGray]	1	4					4	4	4	7.7	7.7	7.7	75.356	0	12.205	131660000	18	24.0978	24.1275	24.4135	23.7141	24.4347	23.9592
	1.3195	0.275907	Q8IWE2	Q8IWE2	Protein NOXP20	FAM114A1	Color2 [DarkGray]	1	4					8	8	8	24.7	24.7	24.7	60.741	0	47.314	311480000	26	25.684	25.4463	25.6446	25.2853	25.4397	25.2222
	0.0343299	0.055809	Q8IXB1	Q8IXB1	DnaJ homolog subfamily C member 10	DNAJC10	Color2 [DarkGray]	1	4					2	2	2	3.4	3.4	3.4	91.079	0	5.8633	70349000	11	23.8463	23.483	22.2387	22.6233	23.3876	23.3897
	0.496959	0.454397	Q8IZ83	Q8IZ83	Aldehyde dehydrogenase family 16 member A1	ALDH16A1	Color2 [DarkGray]	1	4					4	4	4	6.4	6.4	6.4	85.126	0	10.667	112290000	18	23.7666	24.5	24.5639	23.2462	24.2909	23.9301
	0.316075	-0.149062	Q8N163	Q8N163	Cell cycle and apoptosis regulator protein 2	CCAR2	Color2 [DarkGray]	1	4					19	19	19	28.5	28.5	28.5	102.9	0	119.31	1371600000	72	27.5916	27.4904	27.3772	27.5395	27.989	27.378
	0.0571683	-0.042909	Q8N183	Q8N183	Mimitin, mitochondrial	NDUFAF2	Color2 [DarkGray]	1	4					4	4	4	31.4	31.4	31.4	19.856	0	10.613	196870000	15	24.7106	25.0132	24.2939	24.5117	25.0182	24.6165
	0.703587	-0.903745	Q8N1F7	Q8N1F7	Nuclear pore complex protein Nup93	NUP93	Color2 [DarkGray]	1	4					14	14	14	24.1	24.1	24.1	93.487	0	55.532	345260000	32	25.254	25.7322	23.8553	25.7005	26.1749	25.6772
	1.70727	-0.503422	Q8N1G4	Q8N1G4	Leucine-rich repeat-containing protein 47	LRRC47	Color2 [DarkGray]	1	4					12	12	12	20.4	20.4	20.4	63.472	0	32.294	370450000	36	25.4361	25.4092	25.1253	25.9948	25.7954	25.6907
	0.986051	-0.326477	Q8N4X5	Q8N4X5	Actin filament-associated protein 1-like 2	AFAP1L2	Color2 [DarkGray]	1	4					11	11	11	18.9	18.9	18.9	91.299	0	22.247	118080000	24	24.0811	23.6037	23.8937	24.1938	24.0621	24.302
	0.106093	0.047624	Q8N5K1	Q8N5K1	CDGSH iron-sulfur domain-containing protein 2	CISD2	Color2 [DarkGray]	1	4					6	6	6	42.2	42.2	42.2	15.278	0	31.994	341470000	35	25.8541	25.4966	25.4204	25.5055	25.7162	25.4066
	0.0187744	-0.0189095	Q8N6T3	Q8N6T3	ADP-ribosylation factor GTPase-activating protein 1	ARFGAP1	Color2 [DarkGray]	1	4					7	7	7	25.9	25.9	25.9	44.667	0	30.562	240770000	22	25.5974	24.9182	24.534	25.2802	24.9554	24.8708
	0.325016	0.125813	Q8N766	Q8N766	ER membrane protein complex subunit 1	EMC1	Color2 [DarkGray]	1	4					11	11	11	13.9	13.9	13.9	111.76	0	38.548	300560000	30	25.2275	25.3665	25.7106	25.3247	25.4189	25.1836
	0.0667052	0.0107695	Q8NBJ5	Q8NBJ5	Procollagen galactosyltransferase 1	COLGALT1	Color2 [DarkGray]	1	4					12	12	12	20.7	20.7	20.7	71.635	0	32.214	221380000	32	24.8973	24.9431	25.0413	24.9554	25.0109	24.8832
	0.234193	0.117348	Q8NBS9	Q8NBS9	Thioredoxin domain-containing protein 5	TXNDC5	Color2 [DarkGray]	1	4					17	17	17	43.8	43.8	43.8	47.628	0	138.85	4224700000	106	29.3336	29.0507	29.4389	29.2339	28.8512	29.386
	0.0863702	-0.0374991	Q8NC51	Q8NC51	Plasminogen activator inhibitor 1 RNA-binding protein	SERBP1	Color2 [DarkGray]	1	4					16	16	16	39	39	39	44.965	0	125.98	4436100000	96	29.3587	29.0363	29.4112	29.4405	29.1108	29.3674
	0.973525	0.54073	Q8NCA5	Q8NCA5	Protein FAM98A	FAM98A	Color2 [DarkGray]	1	4					5	5	5	14.1	14.1	14.1	55.4	0	23.485	254550000	18	25.6441	25.4694	24.9838	24.7961	25.1319	24.5471
	0.373908	0.0850582	Q8NCW5	Q8NCW5	NAD(P)H-hydrate epimerase	APOA1BP	Color2 [DarkGray]	1	4					7	7	7	34.7	34.7	34.7	31.674	0	50.468	957170000	30	27.0057	27.1364	27.1903	26.8987	27.1678	27.0107
	0.922348	0.389741	Q8NDI1;Q8N3D4	Q8NDI1	EH domain-binding protein 1	EHBP1	Color2 [DarkGray]	1	4					14	14	14	13.8	13.8	13.8	140.02	0	33.166	207370000	37	24.9347	25.2258	24.907	24.9318	24.6197	24.3467
	0.0793937	0.0226002	Q8NE71	Q8NE71	ATP-binding cassette sub-family F member 1	ABCF1	Color2 [DarkGray]	1	4					16	16	16	27.9	27.9	27.9	95.925	0	68.59	807090000	49	26.8662	26.7991	26.6269	26.6964	26.8801	26.6479
	1.24961	-0.347305	Q8NEZ5	Q8NEZ5	F-box only protein 22	FBXO22	Color2 [DarkGray]	1	4					8	8	8	28.3	28.3	28.3	44.508	0	52.326	344410000	23	25.0618	25.4745	25.378	25.6414	25.5912	25.7237
	0.0542095	-0.0478223	Q8NF37	Q8NF37	Lysophosphatidylcholine acyltransferase 1	LPCAT1	Color2 [DarkGray]	1	4					5	5	5	11.2	11.2	11.2	59.151	0	12.726	249410000	18	24.832	25.7047	24.9506	25.4248	25.2403	24.9657
	0.915954	0.605387	Q8NFH3	Q8NFH3	Nucleoporin Nup43	NUP43	Color2 [DarkGray]	1	4					5	5	5	26.6	26.6	26.6	42.15	0	22.776	79214000	17	24.1784	23.6326	23.545	22.8649	23.6433	23.0316
	2.34565	0.325846	Q8TAT6	Q8TAT6	Nuclear protein localization protein 4 homolog	NPLOC4	Color2 [DarkGray]	1	4					16	16	16	34.4	34.4	34.4	68.119	0	70.62	457890000	46	26.1571	26.1506	26.2243	25.751	25.8825	25.9209
	0.440656	-0.288214	Q8TBC4	Q8TBC4	NEDD8-activating enzyme E1 catalytic subunit	UBA3	Color2 [DarkGray]	1	4					4	4	4	9.5	9.5	9.5	51.852	0	9.6179	58359000	14	22.4312	23.1107	22.5615	23.3461	22.9152	22.7068
	0.0956377	0.337508	Q8TBQ9	Q8TBQ9	Protein kish-A	TMEM167A	Color2 [DarkGray]	1	4					2	2	2	25	25	25	8.0598	0.00036805	4.6823	202370000	8	25.1363	25.5054	22.9484	25.0328	22.2434	25.3014
	0.0232272	-0.0161959	Q8TC12;Q96NR8	Q8TC12	Retinol dehydrogenase 11	RDH11	Color2 [DarkGray]	1	4					9	9	9	34	34	34	35.386	0	54.337	724820000	52	26.2392	26.7755	26.9437	26.7339	26.7927	26.4805
	0.198317	-0.109377	Q8TCJ2	Q8TCJ2	Dolichyl-diphosphooligosaccharide--protein glycosyltransferase subunit STT3B	STT3B	Color2 [DarkGray]	1	4					10	10	9	13.9	13.9	13.1	93.673	0	41.381	737700000	35	26.6831	26.8087	26.2848	26.5518	26.9849	26.5681
	0.643362	0.468796	Q8TCS8	Q8TCS8	Polyribonucleotide nucleotidyltransferase 1, mitochondrial	PNPT1	Color2 [DarkGray]	1	4					18	18	18	24.9	24.9	24.9	85.95	0	58.25	469900000	44	26.1031	26.3984	26.1204	26.2131	25.8595	25.1429
	0.914829	0.550741	Q8TCT9	Q8TCT9	Minor histocompatibility antigen H13	HM13	Color2 [DarkGray]	1	4					4	4	4	18.8	18.8	18.8	41.488	0	19.085	630910000	16	26.5543	26.6253	26.9434	25.6768	26.5428	26.2512
	0.445059	0.336448	Q8TEA8	Q8TEA8	D-tyrosyl-tRNA(Tyr) deacylase 1	DTD1	Color2 [DarkGray]	1	4					3	3	3	26.3	26.3	26.3	23.423	0	39.5	261320000	18	25.3277	24.9846	25.7062	25.2946	24.5071	25.2075
	1.65777	-0.311771	Q8TEQ6	Q8TEQ6	Gem-associated protein 5	GEMIN5	Color2 [DarkGray]	1	4					23	23	23	20.4	20.4	20.4	168.59	0	64.022	751300000	67	26.3592	26.6088	26.4765	26.7905	26.8748	26.7145
	0.779389	0.574652	Q8WTV0	Q8WTV0	Scavenger receptor class B member 1	SCARB1	Color2 [DarkGray]	1	4					5	5	5	9.2	9.2	9.2	60.877	0	18.69	264750000	19	25.8117	25.6723	25.2854	25.1345	24.444	25.4669
	0.335617	-0.31638	Q8WUH6	Q8WUH6	Transmembrane protein 263	TMEM263	Color2 [DarkGray]	1	4					4	4	4	44	44	44	11.748	0	12.654	218820000	20	25.3133	24.7095	24.0341	24.9149	24.8484	25.2427
	0.0174765	-0.0098985	Q8WUM4	Q8WUM4	Programmed cell death 6-interacting protein	PDCD6IP	Color2 [DarkGray]	1	4					46	46	46	59.4	59.4	59.4	96.022	0	293.34	5797500000	229	29.5783	29.5352	29.8534	29.7886	29.3491	29.8589
	0.350357	0.113813	Q8WVM8	Q8WVM8	Sec1 family domain-containing protein 1	SCFD1	Color2 [DarkGray]	1	4					10	10	10	22.1	22.1	22.1	72.379	0	38.405	402210000	24	26.1588	25.8007	25.7202	25.7877	25.7786	25.7718
	0.00476644	-0.0150922	Q8WVY7	Q8WVY7	Ubiquitin-like domain-containing CTD phosphatase 1	UBLCP1	Color2 [DarkGray]	1	4					6	6	6	19.5	19.5	19.5	36.804	0	18.312	136550000	14	24.9018	22.5013	24.4406	22.5249	24.4539	24.9102
	1.10959	-0.403977	Q8WWM7	Q8WWM7	Ataxin-2-like protein	ATXN2L	Color2 [DarkGray]	1	4					14	14	14	15.6	15.6	15.6	113.37	0	55.587	552820000	47	25.8664	25.9295	26.1647	26.324	26.669	26.1796
	0.335043	-0.205776	Q8WWY3	Q8WWY3	U4/U6 small nuclear ribonucleoprotein Prp31	PRPF31	Color2 [DarkGray]	1	4					8	8	8	18.8	18.8	18.8	55.455	0	26.375	211020000	30	24.1692	25.0116	24.7152	24.9315	24.7322	24.8498
	0.0727132	0.0266558	Q8WX93;Q86TC9	Q8WX93	Palladin	PALLD	Color2 [DarkGray]	1	4					19	19	19	18.9	18.9	18.9	150.56	0	78.565	1095800000	74	27.4828	27.0533	27.302	27.2843	27.2851	27.1888
	0.901675	-0.354707	Q8WXX5	Q8WXX5	DnaJ homolog subfamily C member 9	DNAJC9	Color2 [DarkGray]	1	4					8	8	8	32.7	32.7	32.7	29.909	0	28.01	271200000	24	25.426	24.9271	24.8354	25.4162	25.4244	25.412
	0.151336	0.0792961	Q8WYA6	Q8WYA6	Beta-catenin-like protein 1	CTNNBL1	Color2 [DarkGray]	1	4					6	6	6	10.8	10.8	10.8	65.173	0	13.428	147130000	20	24.5366	24.0629	24.5812	24.2735	24.1589	24.5104
	0.0631035	0.0155188	Q8WZA9	Q8WZA9	Immunity-related GTPase family Q protein	IRGQ	Color2 [DarkGray]	1	4					8	8	8	16.5	16.5	16.5	62.717	0	17.618	179280000	23	24.6362	24.7301	24.5567	24.6136	24.7509	24.512
	1.41201	0.217745	Q92499	Q92499	ATP-dependent RNA helicase DDX1	DDX1	Color2 [DarkGray]	1	4					26	26	26	44.5	44.5	44.5	82.431	0	157.48	1823100000	99	28.0426	28.0868	28.1617	27.8775	27.7713	27.9891
	0.601304	-0.769647	Q92520	Q92520	Protein FAM3C	FAM3C	Color2 [DarkGray]	1	4					5	5	5	30.4	30.4	30.4	24.68	0	29.649	203220000	17	24.8568	23.1661	24.7222	25.3632	24.7313	24.9595
	0.277386	-0.212152	Q92530	Q92530	Proteasome inhibitor PI31 subunit	PSMF1	Color2 [DarkGray]	1	4					8	8	8	32.5	32.5	32.5	29.816	0	46.747	517150000	32	25.8666	26.5193	25.685	25.9222	26.5235	26.2617
	0.055698	-0.0345236	Q92538	Q92538	Golgi-specific brefeldin A-resistance guanine nucleotide exchange factor 1	GBF1	Color2 [DarkGray]	1	4					19	19	19	13.5	13.5	13.5	206.44	0	53.5	466090000	51	26.0544	25.8842	25.9209	25.7686	26.4027	25.7918
	0.852942	0.54175	Q92542	Q92542	Nicastrin	NCSTN	Color2 [DarkGray]	1	4					4	4	4	5.9	5.9	5.9	78.41	0	10.353	173520000	18	25.2869	24.7963	24.6834	24.0206	24.8078	24.3129
	0.0684895	-0.0266972	Q92552	Q92552	28S ribosomal protein S27, mitochondrial	MRPS27	Color2 [DarkGray]	1	4					10	10	10	27.5	27.5	27.5	47.611	0	47.049	410500000	33	25.9443	25.783	25.6051	25.8106	25.9646	25.6372
	0.744062	0.443518	Q92597	Q92597	Protein NDRG1	NDRG1	Color2 [DarkGray]	1	4					8	8	8	35.5	35.5	35.5	42.835	0	27.851	213580000	22	25.1228	24.8493	25.1172	24.1143	24.6405	25.004
	0.00104362	-0.000255585	Q92598	Q92598	Heat shock protein 105 kDa	HSPH1	Color2 [DarkGray]	1	4					35	32	31	46.7	43.1	42.3	96.864	0	284.66	7393000000	192	30.0936	29.8543	30.0534	30.0602	29.9781	29.9636
	0.0431538	-0.0144291	Q92600	Q92600	Cell differentiation protein RCD1 homolog	RQCD1	Color2 [DarkGray]	1	4					6	6	6	23.1	23.1	23.1	33.631	0	20.961	112920000	14	23.8683	23.7946	24.1229	24.011	23.9858	23.8324
	0.608845	0.100157	Q92616	Q92616	Translational activator GCN1	GCN1L1	Color2 [DarkGray]	1	4					62	62	62	27.3	27.3	27.3	292.75	0	241.62	1975400000	206	28.2592	28.1182	28.1174	28.0849	28.1514	27.9579
	1.44836	-0.527067	Q92734	Q92734	Protein TFG	TFG	Color2 [DarkGray]	1	4					10	10	10	28.2	28.2	28.2	43.447	0	127.12	919070000	29	26.8913	26.3424	26.6914	27.121	27.2756	27.1098
	0.0878685	0.0461763	Q92747	Q92747	Actin-related protein 2/3 complex subunit 1A	ARPC1A	Color2 [DarkGray]	1	4					8	7	7	31.6	25.4	25.4	41.569	0	23.417	508340000	27	26.3349	26.1016	25.9297	26.3483	26.0267	25.8528
	1.03886	-0.621254	Q92823	Q92823	Neuronal cell adhesion molecule	NRCAM	Color2 [DarkGray]	1	4					11	11	11	11.3	11.3	11.3	143.89	0	32.116	226700000	22	24.6902	24.991	24.1029	25.1695	25.4154	25.0631
	0.0657917	-0.0319506	Q92841	Q92841	Probable ATP-dependent RNA helicase DDX17	DDX17	Color2 [DarkGray]	1	4					29	28	22	50.9	49.4	41	80.272	0	101.42	1978800000	101	28.0745	27.9496	28.2086	28.1834	28.3276	27.8176
	0.443931	-0.0784651	Q92887;O15440	Q92887	Canalicular multispecific organic anion transporter 1	ABCC2	Color2 [DarkGray]	1	4					12	12	12	10.6	10.6	10.6	174.21	0	28.45	267830000	30	25.1021	25.2821	25.1308	25.148	25.3118	25.2906
	1.23601	0.39785	Q92888	Q92888	Rho guanine nucleotide exchange factor 1	ARHGEF1	Color2 [DarkGray]	1	4					20	20	20	23.1	23.1	23.1	102.43	0	72.769	703360000	68	26.7573	27.0532	26.6004	26.3026	26.5452	26.3696
	0.480774	0.250221	Q92890	Q92890	Ubiquitin fusion degradation protein 1 homolog	UFD1L	Color2 [DarkGray]	1	4					7	7	7	36.8	36.8	36.8	34.5	0	30.317	371650000	32	26.11	25.4603	25.8175	25.7159	25.6212	25.3
	1.69178	0.329616	Q92896	Q92896	Golgi apparatus protein 1	GLG1	Color2 [DarkGray]	1	4					11	11	11	10.3	10.3	10.3	134.55	0	30.107	169490000	20	24.87	24.7043	24.7107	24.3457	24.5703	24.3801
	0.26237	-0.0382582	Q92900	Q92900	Regulator of nonsense transcripts 1	UPF1	Color2 [DarkGray]	1	4					20	20	20	23.6	23.6	23.6	124.34	0	69.456	582660000	66	26.3194	26.321	26.241	26.35	26.4115	26.2347
	0.72912	0.183347	Q92905	Q92905	COP9 signalosome complex subunit 5	COPS5	Color2 [DarkGray]	1	4					9	9	9	34.4	34.4	34.4	37.578	0	38.6	346450000	30	25.712	25.6734	25.8188	25.3458	25.6051	25.7033
	1.38274	-0.536346	Q92945	Q92945	Far upstream element-binding protein 2	KHSRP	Color2 [DarkGray]	1	4					15	15	13	25	25	22.8	73.114	0	45.511	411500000	38	25.2833	25.541	25.7201	25.8688	26.3009	25.9837
	0.0941169	-0.0215333	Q92973;O14787	Q92973	Transportin-1	TNPO1	Color2 [DarkGray]	1	4					24	24	24	32.5	32.5	32.5	102.35	0	165.28	3819900000	114	29.1524	28.8916	29.0669	29.0371	29.114	29.0244
	0.296478	0.078584	Q93008;O00507	Q93008;O00507	Probable ubiquitin carboxyl-terminal hydrolase FAF-X;Probable ubiquitin carboxyl-terminal hydrolase FAF-Y	USP9X;USP9Y	Color2 [DarkGray]	1	4					35	35	35	16.1	16.1	16.1	292.28	0	140.37	966380000	107	27.1073	27.1459	26.9869	26.996	27.1707	26.8375
	0.227149	-0.0775693	Q93009	Q93009	Ubiquitin carboxyl-terminal hydrolase 7	USP7	Color2 [DarkGray]	1	4					18	18	18	23	23	23	128.3	0	58.074	387700000	38	25.6991	25.813	25.6927	25.5625	25.9834	25.8916
	1.22401	-0.569232	Q969H8	Q969H8	Myeloid-derived growth factor	MYDGF	Color2 [DarkGray]	1	4					3	3	3	20.8	20.8	20.8	18.795	0	15.391	567120000	19	25.6865	26.3365	25.699	26.5114	26.5232	26.3951
	1.09817	-0.678207	Q969T9	Q969T9	WW domain-binding protein 2	WBP2	Color2 [DarkGray]	1	4					1	1	1	3.8	3.8	3.8	28.087	0.0013267	3.1442	70980000	11	22.6864	23.1044	23.5978	24.0436	23.634	23.7455
	0.899421	-0.260263	Q969X5	Q969X5	Endoplasmic reticulum-Golgi intermediate compartment protein 1	ERGIC1	Color2 [DarkGray]	1	4					9	9	9	41.4	41.4	41.4	32.592	0	70.458	818190000	37	26.8615	26.5813	26.7357	27.1585	27.0134	26.7874
	0.514638	0.0814616	Q969Z0	Q969Z0	Protein TBRG4	TBRG4	Color2 [DarkGray]	1	4					12	12	12	28.8	28.8	28.8	70.737	0	38.948	511790000	31	26.0936	26.2769	26.051	26.0663	26.0585	26.0523
	0.0859567	0.269949	Q96A00	Q96A00	Protein phosphatase 1 regulatory subunit 14A	PPP1R14A	Color2 [DarkGray]	1	4					3	3	3	23.1	23.1	23.1	16.693	0	15.023	155500000	12	24.8704	22.7928	24.7604	22.099	24.7534	24.7614
	0.845708	-0.441408	Q96A33	Q96A33	Coiled-coil domain-containing protein 47	CCDC47	Color2 [DarkGray]	1	4					10	10	10	26.9	26.9	26.9	55.873	0	31.972	428590000	40	25.4204	26.041	25.3297	25.8542	26.1592	26.102
	0.00311325	0.0029761	Q96A49	Q96A49	Synapse-associated protein 1	SYAP1	Color2 [DarkGray]	1	4					10	10	10	34.1	34.1	34.1	39.933	0	78.167	604530000	32	26.1505	26.3318	26.3982	26.6002	26.5881	25.6834
	1.2487	0.697234	Q96AC1	Q96AC1	Fermitin family homolog 2	FERMT2	Color2 [DarkGray]	1	4					17	17	16	30.7	30.7	29.3	77.86	0	50.837	470730000	45	26.5039	26.0421	26.5878	25.9221	25.8358	25.2841
	1.57313	-0.261675	Q96AE4	Q96AE4	Far upstream element-binding protein 1	FUBP1	Color2 [DarkGray]	1	4					14	12	12	26.4	25.2	25.2	67.56	0	45.069	561220000	48	26.1248	25.9563	26.2063	26.3815	26.3747	26.3163
	0.812047	0.299608	Q96AG4	Q96AG4	Leucine-rich repeat-containing protein 59	LRRC59	Color2 [DarkGray]	1	4					12	12	12	44.3	44.3	44.3	34.93	0	146.97	4691900000	59	29.6625	29.1606	29.6369	29.1981	29.2679	29.0952
	1.37253	0.764496	Q96B97	Q96B97	SH3 domain-containing kinase-binding protein 1	SH3KBP1	Color2 [DarkGray]	1	4					8	8	8	17	17	17	73.125	0	60.88	323010000	25	26.1035	25.5	25.9555	25.2719	24.7162	25.2775
	1.31858	-0.314325	Q96C01	Q96C01	Protein FAM136A	FAM136A	Color2 [DarkGray]	1	4					8	8	8	63	63	63	15.641	0	21.255	430820000	27	25.66	25.7426	25.7598	26.205	26.0636	25.8367
	2.68496	0.196253	Q96C19	Q96C19	EF-hand domain-containing protein D2	EFHD2	Color2 [DarkGray]	1	4					11	11	9	49.6	49.6	40.8	26.697	0	36.571	1159200000	54	27.4072	27.4904	27.4393	27.2499	27.2262	27.272
	0.018003	-0.0189006	Q96CP6	Q96CP6	GRAM domain-containing protein 1A	GRAMD1A	Color2 [DarkGray]	1	4					6	6	6	10.9	10.9	10.9	80.679	0	15.786	90648000	15	24.1066	23.3705	23.3753	24.0867	23.228	23.5943
	0.31127	-0.163061	Q96CT7	Q96CT7	Coiled-coil domain-containing protein 124	CCDC124	Color2 [DarkGray]	1	4					8	8	8	40.4	40.4	40.4	25.835	0	25.426	397090000	30	25.9863	25.3035	25.8331	25.9261	25.7618	25.9242
	1.66641	0.426444	Q96CW1	Q96CW1	AP-2 complex subunit mu	AP2M1	Color2 [DarkGray]	1	4					12	12	12	34	34	34	49.654	0	72.587	945710000	53	27.2366	27.3071	27.1813	26.8421	26.992	26.6116
	0.415022	0.106902	Q96DB5	Q96DB5	Regulator of microtubule dynamics protein 1	RMDN1	Color2 [DarkGray]	1	4					5	5	5	15.6	15.6	15.6	35.808	0	9.062	77799000	11	23.5254	23.5729	23.4692	23.2634	23.6181	23.3653
	0.260603	0.0740776	Q96DV4	Q96DV4	39S ribosomal protein L38, mitochondrial	MRPL38	Color2 [DarkGray]	1	4					8	8	8	26.1	26.1	26.1	44.596	0	20.218	156840000	21	24.3511	24.52	24.5653	24.2197	24.5053	24.4892
	0.144832	0.210353	Q96EM0	Q96EM0	Trans-3-hydroxy-L-proline dehydratase	L3HYPDH	Color2 [DarkGray]	1	4					4	4	4	16.7	16.7	16.7	38.137	0	24.208	97213000	12	24.7084	23.4531	23.6922	23.0578	24.3627	23.8021
	1.35713	-0.325158	Q96EY7	Q96EY7	Pentatricopeptide repeat domain-containing protein 3, mitochondrial	PTCD3	Color2 [DarkGray]	1	4					10	10	10	17.7	17.7	17.7	78.549	0	26.693	233830000	25	24.6975	24.9088	24.9955	25.0842	25.3196	25.1734
	0.0227818	-0.0212765	Q96FQ6	Q96FQ6	Protein S100-A16	S100A16	Color2 [DarkGray]	1	4					5	5	5	38.8	38.8	38.8	11.801	0	18.291	504140000	27	25.8715	25.9952	26.4937	26.2835	25.6601	26.4806
	0.626803	-0.137696	Q96FW1	Q96FW1	Ubiquitin thioesterase OTUB1	OTUB1	Color2 [DarkGray]	1	4					12	12	12	50.6	50.6	50.6	31.284	0	90.083	2478300000	79	28.4579	28.3909	28.2018	28.3641	28.5353	28.5643
	0.12186	0.331986	Q96FX7	Q96FX7	tRNA (adenine(58)-N(1))-methyltransferase catalytic subunit TRMT61A	TRMT61A	Color2 [DarkGray]	1	4					4	4	4	24.2	24.2	24.2	31.381	0	23.119	162770000	14	25.0752	25.2578	22.9477	22.779	24.61	24.8957
	0.741502	0.824883	Q96GA7	Q96GA7	Serine dehydratase-like	SDSL	Color2 [DarkGray]	1	4					6	6	6	26.1	26.1	26.1	34.674	0	41.74	127850000	12	24.61	24.625	24.5089	22.7439	24.1703	24.355
	0.224442	0.318839	Q96H79	Q96H79	Zinc finger CCCH-type antiviral protein 1-like	ZC3HAV1L	Color2 [DarkGray]	1	4					9	9	9	39.7	39.7	39.7	32.962	0	26.533	229940000	27	24.8715	24.8346	25.3409	25.4093	25.0217	23.6595
	0.266674	0.0470587	Q96HC4	Q96HC4	PDZ and LIM domain protein 5	PDLIM5	Color2 [DarkGray]	1	4					15	15	15	36.6	36.6	36.6	63.944	0	55.146	733160000	63	26.7951	26.7528	26.6395	26.7078	26.58	26.7584
	0.0662043	0.0178521	Q96HE7;Q86YB8	Q96HE7	ERO1-like protein alpha	ERO1L	Color2 [DarkGray]	1	4					14	14	14	38.2	38.2	38.2	54.392	0	101.83	2411000000	84	28.4339	28.4592	28.3413	28.3457	28.5623	28.2729
	0.626518	-0.176386	Q96HS1	Q96HS1	Serine/threonine-protein phosphatase PGAM5, mitochondrial	PGAM5	Color2 [DarkGray]	1	4					5	5	5	16.3	16.3	16.3	32.004	0	11.333	97813000	15	23.6515	23.6113	23.7441	23.678	24.0791	23.779
	0.178204	0.0805168	Q96I24	Q96I24	Far upstream element-binding protein 3	FUBP3	Color2 [DarkGray]	1	4					8	8	8	27.3	27.3	27.3	61.64	0	23.578	122760000	20	23.9776	24.2966	24.1373	23.855	23.9773	24.3376
	0.48454	0.262693	Q96I99	Q96I99	Succinyl-CoA ligase [GDP-forming] subunit beta, mitochondrial	SUCLG2	Color2 [DarkGray]	1	4					15	15	15	42.1	42.1	42.1	46.51	0	69.723	999090000	49	27.533	27.2033	27.0259	26.8381	27.3561	26.7799
	0.479634	0.334121	Q96IU4	Q96IU4	Alpha/beta hydrolase domain-containing protein 14B	ABHD14B	Color2 [DarkGray]	1	4					4	4	4	25.2	25.2	25.2	22.345	0	25.09	280350000	21	25.8413	25.3514	25.025	24.6979	25.2895	25.228
	0.475552	-0.256476	Q96IZ0	Q96IZ0	PRKC apoptosis WT1 regulator protein	PAWR	Color2 [DarkGray]	1	4					7	7	7	34.4	34.4	34.4	36.567	0	53.698	251280000	24	25.0089	24.6994	25.4201	25.1028	25.4648	25.3302
	0.404686	0.250041	Q96JB5	Q96JB5	CDK5 regulatory subunit-associated protein 3	CDK5RAP3	Color2 [DarkGray]	1	4					6	6	6	12.3	12.3	12.3	56.92	0	10.036	64523000	16	22.9922	23.0852	23.7769	22.9805	22.9211	23.2025
	0.019461	-0.0135651	Q96JJ7	Q96JJ7	Protein disulfide-isomerase TMX3	TMX3	Color2 [DarkGray]	1	4					5	5	5	14.5	14.5	14.5	51.871	0	14.473	253690000	19	24.7451	25.2611	25.2904	25.0998	25.3781	24.8594
	0.0731478	0.0390981	Q96K76	Q96K76	Ubiquitin carboxyl-terminal hydrolase 47	USP47	Color2 [DarkGray]	1	4					15	15	15	14.7	14.7	14.7	157.31	0	39.183	172420000	33	24.343	24.8495	24.4955	24.7473	24.3922	24.4312
	0.44903	0.172238	Q96LD4	Q96LD4	Tripartite motif-containing protein 47	TRIM47	Color2 [DarkGray]	1	4					9	9	9	18.2	18.2	18.2	69.531	0	33.117	336930000	43	25.5643	25.8829	25.4825	25.5711	25.5925	25.2493
	0.0985318	0.0297362	Q96P70	Q96P70	Importin-9	IPO9	Color2 [DarkGray]	1	4					16	16	16	18.6	18.6	18.6	115.96	0	67.56	343540000	33	25.4652	25.7411	25.6954	25.4826	25.7112	25.6187
	0.0806121	0.0299988	Q96PD2	Q96PD2	Discoidin, CUB and LCCL domain-containing protein 2	DCBLD2	Color2 [DarkGray]	1	4					6	6	6	15.6	15.6	15.6	85.034	0	31.633	322810000	24	25.6522	25.5454	25.2805	25.3682	25.602	25.4178
	0.706625	1.30509	Q96PZ0	Q96PZ0	Pseudouridylate synthase 7 homolog	PUS7	Color2 [DarkGray]	1	4					15	15	15	28.4	28.4	28.4	75.035	0	49.06	239190000	33	25.6255	25.5459	25.0167	25.0997	24.7088	22.4644
	0.734157	0.168885	Q96Q11	Q96Q11	CCA tRNA nucleotidyltransferase 1, mitochondrial	TRNT1	Color2 [DarkGray]	1	4					7	7	7	18.4	18.4	18.4	50.127	0	18.167	416830000	27	25.9652	26.0475	25.7519	25.7997	25.8208	25.6375
	0.198954	0.0446771	Q96QK1	Q96QK1	Vacuolar protein sorting-associated protein 35	VPS35	Color2 [DarkGray]	1	4					24	24	24	32.9	32.9	32.9	91.706	0	181.39	2816800000	108	28.7169	28.5447	28.7396	28.6496	28.7112	28.5063
	0.837688	-0.499802	Q96RP9	Q96RP9	Elongation factor G, mitochondrial	GFM1	Color2 [DarkGray]	1	4					12	12	12	19.8	19.8	19.8	83.471	0	35.779	429340000	26	25.823	25.5918	25.0992	25.8964	26.3491	25.7679
	0.257159	0.146339	Q96RS6	Q96RS6	NudC domain-containing protein 1	NUDCD1	Color2 [DarkGray]	1	4					10	10	10	20.2	20.2	20.2	66.755	0	32.209	341230000	24	25.3214	25.8983	25.9439	25.7428	25.3807	25.6012
	0.203379	0.261805	Q96RT1	Q96RT1	Protein LAP2	ERBB2IP	Color2 [DarkGray]	1	4					4	4	4	3	3	3	158.3	0	9.5919	51312000	15	23.1248	22.7635	24.2487	22.7013	23.4291	23.2213
	1.11512	0.268995	Q96S52	Q96S52	GPI transamidase component PIG-S	PIGS	Color2 [DarkGray]	1	4					5	5	5	13.2	13.2	13.2	61.655	0	22.289	153920000	12	24.7724	24.5969	24.7816	24.6029	24.4694	24.2716
	0.559573	-0.29418	Q96T51;Q7L099;Q8WXA3	Q96T51	RUN and FYVE domain-containing protein 1	RUFY1	Color2 [DarkGray]	1	4					11	11	11	19.4	19.4	19.4	79.817	0	27.18	295840000	30	24.8763	25.2898	25.4527	25.6064	25.7052	25.1897
	0.469327	0.243558	Q96T76	Q96T76	MMS19 nucleotide excision repair protein homolog	MMS19	Color2 [DarkGray]	1	4					13	13	13	19	19	19	113.29	0	48.481	318950000	40	25.531	25.94	25.2599	25.2003	25.2552	25.5447
	1.39671	0.272779	Q96TA1	Q96TA1	Niban-like protein 1	FAM129B	Color2 [DarkGray]	1	4					12	12	12	20.1	20.1	20.1	84.137	0	58.269	877820000	44	27.2556	27.06	27.0112	26.7439	26.8401	26.9243
	0.918658	-0.189229	Q99426	Q99426	Tubulin-folding cofactor B	TBCB	Color2 [DarkGray]	1	4					10	10	10	46.7	46.7	46.7	27.325	0	57.811	2085900000	39	27.9848	28.0048	28.1777	28.3317	28.306	28.0973
	0.186105	-0.0513903	Q99436	Q99436	Proteasome subunit beta type-7	PSMB7	Color2 [DarkGray]	1	4					9	9	9	41.5	41.5	41.5	29.965	0	104.85	2226700000	46	28.2909	28.0735	28.3293	28.3148	28.1502	28.383
	1.65668	0.432687	Q99439	Q99439	Calponin-2	CNN2	Color2 [DarkGray]	1	4					13	13	12	57.6	57.6	54	33.697	0	113.77	2183000000	51	28.4362	28.316	28.7035	28.0031	28.0409	28.1135
	0.171492	-0.0208321	Q99460	Q99460	26S proteasome non-ATPase regulatory subunit 1	PSMD1	Color2 [DarkGray]	1	4					33	33	33	43.8	43.8	43.8	105.84	0	217.15	3097500000	147	28.674	28.7849	28.8017	28.7998	28.7295	28.7937
	0.778512	-0.359703	Q99471	Q99471	Prefoldin subunit 5	PFDN5	Color2 [DarkGray]	1	4					8	8	8	59.7	59.7	59.7	17.328	0	45.711	950880000	36	26.4851	27.0403	27.0364	27.243	27.3818	27.0162
	0.317722	0.0628007	Q99497	Q99497	Protein deglycase DJ-1	PARK7	Color2 [DarkGray]	1	4					17	17	17	89.9	89.9	89.9	19.891	0	216.73	6329100000	90	29.9475	29.7192	29.8866	29.8752	29.7491	29.7407
	0.025544	0.0120411	Q99543	Q99543	DnaJ homolog subfamily C member 2;DnaJ homolog subfamily C member 2, N-terminally processed	DNAJC2	Color2 [DarkGray]	1	4					10	10	10	22.5	22.5	22.5	71.996	0	30.036	183950000	22	24.7772	24.6289	24.5829	24.3585	24.7781	24.8162
	1.36944	-0.742161	Q99584	Q99584	Protein S100-A13	S100A13	Color2 [DarkGray]	1	4					4	4	4	40.8	40.8	40.8	11.471	0	11.97	161100000	16	24.2992	24.2646	23.6973	24.5457	25.1039	24.838
	0.12314	-0.0689843	Q99598	Q99598	Translin-associated protein X	TSNAX	Color2 [DarkGray]	1	4					4	4	4	19.3	19.3	19.3	33.112	0	11.929	362250000	20	25.9025	25.5421	25.3823	25.5028	25.5873	25.9437
	0.0196103	-0.00481351	Q99613;B5ME19	Q99613;B5ME19	Eukaryotic translation initiation factor 3 subunit C;Eukaryotic translation initiation factor 3 subunit C-like protein	EIF3C;EIF3CL	Color2 [DarkGray]	1	4					24	24	24	32.4	32.4	32.4	105.34	0	172.55	3025300000	102	28.6382	28.7993	28.7357	28.8631	28.6645	28.66
	0.183754	0.303962	Q99614	Q99614	Tetratricopeptide repeat protein 1	TTC1	Color2 [DarkGray]	1	4					7	7	7	29.8	29.8	29.8	33.526	0	19.62	190500000	18	24.8146	24.5978	24.8454	24.945	23.2053	25.1955
	0.0468444	-0.0225321	Q99615	Q99615	DnaJ homolog subfamily C member 7	DNAJC7	Color2 [DarkGray]	1	4					20	20	20	41.7	41.7	41.7	56.44	0	67.806	1110000000	71	27.23	27.0583	27.4156	27.4037	27.0015	27.3663
	0.680006	0.210159	Q99623	Q99623	Prohibitin-2	PHB2	Color2 [DarkGray]	1	4					12	12	12	47.2	47.2	47.2	33.296	0	109.33	1604400000	65	27.6976	28.1521	27.9178	27.7503	27.7735	27.6132
	0.683828	-0.611484	Q99627	Q99627	COP9 signalosome complex subunit 8	COPS8	Color2 [DarkGray]	1	4					3	3	3	20.1	20.1	20.1	23.225	0	16.665	132370000	15	24.114	24.2266	23.1924	24.6004	24.7817	23.9855
	1.91432	0.289981	Q99714	Q99714	3-hydroxyacyl-CoA dehydrogenase type-2	HSD17B10	Color2 [DarkGray]	1	4					15	15	15	79.3	79.3	79.3	26.923	0	274.02	4170900000	104	29.3515	29.2565	29.3525	28.9647	29.1471	28.9788
	0.34811	0.544713	Q99720	Q99720	Sigma non-opioid intracellular receptor 1	SIGMAR1	Color2 [DarkGray]	1	4					4	4	4	32.3	32.3	32.3	25.127	0	29.557	174820000	15	24.3863	25.0453	24.7342	24.5627	25.0062	22.9627
	1.05946	-0.168292	Q99729	Q99729	Heterogeneous nuclear ribonucleoprotein A/B	HNRNPAB	Color2 [DarkGray]	1	4					8	8	8	23.5	23.5	23.5	36.224	0	27.75	752720000	35	26.7243	26.6494	26.4851	26.7774	26.834	26.7523
	0.47073	-0.22946	Q99733	Q99733	Nucleosome assembly protein 1-like 4	NAP1L4	Color2 [DarkGray]	1	4					10	8	8	23.2	20.5	20.5	42.823	0	33.795	630590000	28	26.1482	26.6054	26.2089	26.6566	26.2449	26.7493
	0.858446	-0.258133	Q99747	Q99747	Gamma-soluble NSF attachment protein	NAPG	Color2 [DarkGray]	1	4					4	4	4	15.7	15.7	15.7	34.746	0	11.059	82196000	13	23.2741	23.4238	23.288	23.6996	23.7358	23.3249
	0.305693	0.153639	Q99798	Q99798	Aconitate hydratase, mitochondrial	ACO2	Color2 [DarkGray]	1	4					10	10	10	16.9	16.9	16.9	85.424	0	40.809	432490000	46	25.7237	26.0753	26.1223	25.5088	26.0505	25.9011
	0.0141181	0.0238228	Q99805	Q99805	Transmembrane 9 superfamily member 2	TM9SF2	Color2 [DarkGray]	1	4					5	5	5	7.8	7.8	7.8	75.775	0	24.675	130640000	16	24.3	24.492	23.558	23.134	24.6231	24.5214
	1.03608	-0.20782	Q99873;Q9NR22	Q99873	Protein arginine N-methyltransferase 1	PRMT1	Color2 [DarkGray]	1	4					22	22	22	65.1	65.1	65.1	41.515	0	239.56	6064400000	139	29.548	29.6815	29.6219	29.678	29.9755	29.8213
	0.155226	0.0723578	Q99961	Q99961	Endophilin-A2	SH3GL1	Color2 [DarkGray]	1	4					5	5	5	16.6	16.6	16.6	41.489	0	25.08	222340000	19	25.1944	24.848	24.7934	24.808	25.1072	24.7035
	0.411562	0.930163	Q9BPW8	Q9BPW8	Protein NipSnap homolog 1	NIPSNAP1	Color2 [DarkGray]	1	4					10	10	9	52.8	52.8	50.4	33.31	0	37.113	487520000	25	26.5926	26.0567	26.3324	26.2869	26.4019	23.5025
	0.120475	-0.0634174	Q9BPX3	Q9BPX3	Condensin complex subunit 3	NCAPG	Color2 [DarkGray]	1	4					19	19	19	20.5	20.5	20.5	114.33	0	65.498	517750000	47	26.1956	25.8159	26.0832	26.4057	25.9524	25.9269
	0.390049	0.56055	Q9BPX5	Q9BPX5	Actin-related protein 2/3 complex subunit 5-like protein	ARPC5L	Color2 [DarkGray]	1	4					2	2	2	16.3	16.3	16.3	16.941	0	14.821	173060000	11	25.2558	24.7989	23.9782	24.3627	24.7927	23.1959
	0.466996	0.0883166	Q9BQ52	Q9BQ52	Zinc phosphodiesterase ELAC protein 2	ELAC2	Color2 [DarkGray]	1	4					21	21	21	36.3	36.3	36.3	92.218	0	68.865	979080000	77	27.2396	27.1884	27.0239	27.1564	27.0425	26.988
	0.904899	0.319194	Q9BQ67	Q9BQ67	Glutamate-rich WD repeat-containing protein 1	GRWD1	Color2 [DarkGray]	1	4					6	6	6	17.3	17.3	17.3	49.419	0	25.711	313080000	25	25.8072	25.5052	25.5392	25.5398	25.2774	25.0769
	0.321295	0.196455	Q9BQA1	Q9BQA1	Methylosome protein 50	WDR77	Color2 [DarkGray]	1	4					6	6	6	33	33	33	36.724	0	79.531	1041400000	32	27.5219	27.3908	26.8132	26.913	27.2944	26.9292
	0.525863	0.234755	Q9BQE3	Q9BQE3	Tubulin alpha-1C chain	TUBA1C	Color2 [DarkGray]	1	4					33	2	2	78.4	9.1	9.1	49.895	0	82.537	3058800000	23	28.9215	28.6562	29.0376	28.4261	28.5324	28.9525
	0.102605	-0.0336698	Q9BR76;A9Z1Z3	Q9BR76	Coronin-1B	CORO1B	Color2 [DarkGray]	1	4					9	9	9	28.2	28.2	28.2	54.234	0	25.216	373140000	28	25.7326	25.697	25.6453	25.7554	25.9081	25.5123
	0.287962	-0.125487	Q9BRA2	Q9BRA2	Thioredoxin domain-containing protein 17	TXNDC17	Color2 [DarkGray]	1	4					6	6	6	48.8	48.8	48.8	13.941	0	30.591	1538200000	38	27.613	27.9352	27.405	27.8272	27.611	27.8914
	0.751413	0.208188	Q9BRF8	Q9BRF8	Serine/threonine-protein phosphatase CPPED1	CPPED1	Color2 [DarkGray]	1	4					5	5	5	25.2	25.2	25.2	35.548	0	19.413	386940000	19	25.7108	25.8398	25.9816	25.8066	25.4589	25.6422
	0.0395716	0.0307782	Q9BRK5	Q9BRK5	45 kDa calcium-binding protein	SDF4	Color2 [DarkGray]	1	4					7	7	7	27.1	27.1	27.1	41.806	0	20.458	128020000	20	23.9386	24.5803	24.1655	24.0803	23.9502	24.5615
	1.48336	-0.349679	Q9BRR6	Q9BRR6	ADP-dependent glucokinase	ADPGK	Color2 [DarkGray]	1	4					9	9	9	27.2	27.2	27.2	54.088	0	72.041	417480000	32	25.5574	25.4917	25.7469	25.9848	26.0614	25.7989
	0.403917	0.320655	Q9BRX5	Q9BRX5	DNA replication complex GINS protein PSF3	GINS3	Color2 [DarkGray]	1	4					4	4	4	19.9	19.9	19.9	24.534	0	8.4729	87123000	15	24.1708	23.8804	23.0483	23.391	23.3676	23.379
	0.471652	0.121144	Q9BS26	Q9BS26	Endoplasmic reticulum resident protein 44	ERP44	Color2 [DarkGray]	1	4					13	13	13	34.2	34.2	34.2	46.971	0	53.782	1094000000	65	27.3956	27.2496	27.1891	26.9769	27.2071	27.2868
	0.888006	0.408646	Q9BSD7	Q9BSD7	Cancer-related nucleoside-triphosphatase	NTPCR	Color2 [DarkGray]	1	4					7	7	7	39.5	39.5	39.5	20.713	0	18.663	161730000	22	24.804	24.6684	24.5991	24.6533	23.9424	24.25
	0.585117	0.116732	Q9BSJ8	Q9BSJ8	Extended synaptotagmin-1	ESYT1	Color2 [DarkGray]	1	4					19	19	19	24.1	24.1	24.1	122.85	0	112.71	1263900000	74	27.6583	27.3557	27.5164	27.3683	27.3862	27.4257
	0.607037	0.188501	Q9BT22	Q9BT22	Chitobiosyldiphosphodolichol beta-mannosyltransferase	ALG1	Color2 [DarkGray]	1	4					4	4	4	10.6	10.6	10.6	52.518	0	28.76	200300000	24	24.8291	24.8782	24.8944	24.4931	24.948	24.5951
	0.45147	0.250009	Q9BT78	Q9BT78	COP9 signalosome complex subunit 4	COPS4	Color2 [DarkGray]	1	4					10	10	10	34.7	34.7	34.7	46.268	0	57.602	497770000	44	26.6202	26.1541	25.888	26.024	26.1205	25.7677
	0.29651	-0.540443	Q9BTE6	Q9BTE6	Alanyl-tRNA editing protein Aarsd1	AARSD1	Color2 [DarkGray]	1	4					10	10	10	30.6	30.6	30.6	45.479	0	26.412	256780000	28	25.2542	25.4144	23.1715	25.4404	25.1204	24.9008
	0.034378	-0.0260601	Q9BTT0	Q9BTT0	Acidic leucine-rich nuclear phosphoprotein 32 family member E	ANP32E	Color2 [DarkGray]	1	4					4	4	4	18.3	18.3	18.3	30.692	0	72.025	680360000	23	26.7759	26.7128	26.0809	26.3077	26.5959	26.7442
	0.578018	0.630157	Q9BTU6	Q9BTU6	Phosphatidylinositol 4-kinase type 2-alpha	PI4K2A	Color2 [DarkGray]	1	4					4	4	4	12.1	12.1	12.1	54.022	0	13.673	87910000	11	23.7938	24.1301	23.9047	22.3643	23.847	23.7269
	0.0408203	-0.0343297	Q9BTV4	Q9BTV4	Transmembrane protein 43	TMEM43	Color2 [DarkGray]	1	4					11	11	11	40.8	40.8	40.8	44.875	0	57.277	654620000	48	25.8716	26.7012	26.6565	26.5035	26.5735	26.2553
	2.01207	0.423492	Q9BTW9	Q9BTW9	Tubulin-specific chaperone D	TBCD	Color2 [DarkGray]	1	4					19	19	19	20.8	20.8	20.8	132.6	0	57.296	849660000	75	27.0026	27.0326	27.2464	26.5735	26.7027	26.7349
	0.0496726	0.0564556	Q9BTZ2;Q6PKH6;P0CG22	Q9BTZ2	Dehydrogenase/reductase SDR family member 4	DHRS4	Color2 [DarkGray]	1	4					3	3	3	16.2	16.2	16.2	29.537	0.00038344	5.3893	76495000	13	23.041	23.7717	23.662	23.9866	23.4298	22.889
	0.255649	0.078366	Q9BUF5	Q9BUF5	Tubulin beta-6 chain	TUBB6	Color2 [DarkGray]	1	4					22	8	8	70.4	33.4	33.4	49.857	0	155.16	2770600000	36	28.6845	28.631	28.4593	28.5094	28.6903	28.3401
	0.388979	0.0572745	Q9BUJ2	Q9BUJ2	Heterogeneous nuclear ribonucleoprotein U-like protein 1	HNRNPUL1	Color2 [DarkGray]	1	4					20	20	20	28.2	28.2	28.2	95.737	0	108.69	2553000000	89	28.3949	28.5828	28.529	28.3936	28.4562	28.4851
	0.00284905	-0.021485	Q9BUK6	Q9BUK6	Protein misato homolog 1	MSTO1	Color2 [DarkGray]	1	4					2	2	2	3.3	3.3	3.3	61.835	0.0003639	4.4517	2243300000	10	28.5592	23.172	28.6924	28.2666	23.5126	28.7088
	0.732217	0.381311	Q9BUL8	Q9BUL8	Programmed cell death protein 10	PDCD10	Color2 [DarkGray]	1	4					4	4	4	27.8	27.8	27.8	24.701	0	32.271	200790000	18	24.8145	25.2966	24.9031	24.7814	24.838	24.2508
	0.0122076	-0.00629044	Q9BUP3	Q9BUP3	Oxidoreductase HTATIP2	HTATIP2	Color2 [DarkGray]	1	4					14	14	14	49.2	49.2	49.2	27.049	0	33.536	558690000	35	26.1239	26.281	26.233	26.398	25.892	26.3667
	0.470675	-0.491675	Q9BUQ8	Q9BUQ8	Probable ATP-dependent RNA helicase DDX23	DDX23	Color2 [DarkGray]	1	4					7	7	7	9.5	9.5	9.5	95.581	0	14.594	147590000	16	24.2503	24.6474	23.1931	24.2812	24.5666	24.718
	0.239155	-0.616344	Q9BV44	Q9BV44	THUMP domain-containing protein 3	THUMPD3	Color2 [DarkGray]	1	4					7	7	7	16.4	16.4	16.4	57.002	0	21.827	210730000	15	25.4098	25.0454	22.2232	25.0864	24.6465	24.7945
	0.499924	-0.979678	Q9BV57	Q9BV57	1,2-dihydroxy-3-keto-5-methylthiopentene dioxygenase	ADI1	Color2 [DarkGray]	1	4					8	8	8	57.5	57.5	57.5	21.498	0	18.012	258380000	26	25.2458	25.2373	22.6781	25.2827	25.3567	25.4609
	0.610024	-0.16518	Q9BV86	Q9BV86	N-terminal Xaa-Pro-Lys N-methyltransferase 1;N-terminal Xaa-Pro-Lys N-methyltransferase 1, N-terminally processed	NTMT1	Color2 [DarkGray]	1	4					6	6	6	41.3	41.3	41.3	25.387	0	30.735	249630000	19	25.1184	24.9092	25.0767	25.0419	25.3941	25.1637
	1.46587	0.49329	Q9BVA1	Q9BVA1	Tubulin beta-2B chain	TUBB2B	Color2 [DarkGray]	1	4					26	6	1	78.7	25.2	3.6	49.953	0	53.75	1155500000	34	27.7521	27.3166	27.6134	27.1341	27.1765	26.8916
	0.740698	-0.543013	Q9BVG4	Q9BVG4	Protein PBDC1	PBDC1	Color2 [DarkGray]	1	4					7	7	7	36.9	36.9	36.9	26.056	0	28.956	378780000	27	25.7996	25.4515	24.6951	25.8399	25.7258	26.0096
	0.989005	-0.277722	Q9BVK6	Q9BVK6	Transmembrane emp24 domain-containing protein 9	TMED9	Color2 [DarkGray]	1	4					7	7	6	26.4	26.4	26.4	27.277	0	52.416	1341500000	41	27.5433	27.3579	27.3029	27.5204	27.8898	27.6271
	1.60634	-0.260965	Q9BWD1	Q9BWD1	Acetyl-CoA acetyltransferase, cytosolic	ACAT2	Color2 [DarkGray]	1	4					10	10	10	44.1	44.1	44.1	41.35	0	82.256	1255900000	57	27.428	27.2028	27.2857	27.5896	27.4979	27.6118
	0.0229545	-0.0219186	Q9BX68	Q9BX68	Histidine triad nucleotide-binding protein 2, mitochondrial	HINT2	Color2 [DarkGray]	1	4					6	6	6	51.5	51.5	51.5	17.162	0	61.807	771410000	24	27.1075	26.8086	26.1255	26.5667	26.9655	26.5751
	0.214428	0.0667381	Q9BXJ9;Q6N069	Q9BXJ9	N-alpha-acetyltransferase 15, NatA auxiliary subunit	NAA15	Color2 [DarkGray]	1	4					21	21	21	26.3	26.3	26.3	101.27	0	84.918	1183700000	81	27.2972	27.6425	27.3201	27.26	27.3929	27.4067
	0.706521	-0.176485	Q9BXP5	Q9BXP5	Serrate RNA effector molecule homolog	SRRT	Color2 [DarkGray]	1	4					14	14	14	20.3	20.3	20.3	100.67	0	44.969	379080000	32	25.5098	25.8529	25.5366	25.7511	25.8434	25.8342
	0.0166485	0.0028038	Q9BXS5;Q9Y6Q5	Q9BXS5	AP-1 complex subunit mu-1	AP1M1	Color2 [DarkGray]	1	4					10	10	10	30.3	30.3	30.3	48.586	0	31.047	466460000	34	26.0035	25.9305	25.9846	26.0605	25.9674	25.8824
	0.325666	0.243693	Q9BXW7	Q9BXW7	Cat eye syndrome critical region protein 5	CECR5	Color2 [DarkGray]	1	4					6	6	6	26	26	26	46.321	0	30.887	315870000	23	26.0601	25.4834	25.1908	25.2164	25.672	25.1148
	1.27544	0.51598	Q9BY32	Q9BY32	Inosine triphosphate pyrophosphatase	ITPA	Color2 [DarkGray]	1	4					6	6	6	38.1	38.1	38.1	21.445	0	58.684	1158100000	30	27.9304	27.5211	27.2932	27.0724	27.1233	27.001
	0.0383502	0.0103022	Q9BY44	Q9BY44	Eukaryotic translation initiation factor 2A;Eukaryotic translation initiation factor 2A, N-terminally processed	EIF2A	Color2 [DarkGray]	1	4					16	16	16	41.7	41.7	41.7	64.989	0	46.638	511400000	46	26.2545	26.2112	25.9884	26.1209	26.086	26.2164
	1.08454	-0.186822	Q9BYT8	Q9BYT8	Neurolysin, mitochondrial	NLN	Color2 [DarkGray]	1	4					24	24	24	40.8	40.8	40.8	80.651	0	153.19	2110100000	94	28.1479	28.0387	28.0592	28.1596	28.4092	28.2375
	0.367293	0.260029	Q9BZE1	Q9BZE1	39S ribosomal protein L37, mitochondrial	MRPL37	Color2 [DarkGray]	1	4					5	5	5	14.7	14.7	14.7	48.117	0	20.352	115480000	19	23.6767	24.5393	24.1323	23.555	23.914	24.0993
	1.57295	0.592621	Q9BZG1	Q9BZG1	Ras-related protein Rab-34	RAB34	Color2 [DarkGray]	1	4					6	6	6	25.1	25.1	25.1	29.044	0	16.769	218780000	20	25.476	25.1381	25.0026	24.7615	24.657	24.4203
	0.721027	-1.15908	Q9BZX2	Q9BZX2	Uridine-cytidine kinase 2	UCK2	Color2 [DarkGray]	1	4					5	5	5	25.7	25.7	25.7	29.299	0	16.82	306400000	23	25.3632	25.251	23.1069	25.7279	25.8092	25.6612
	0.844987	-0.250487	Q9BZZ5	Q9BZZ5	Apoptosis inhibitor 5	API5	Color2 [DarkGray]	1	4					6	6	6	13.4	13.4	13.4	59.004	0	30.059	315790000	26	25.1191	25.4144	25.2458	25.5849	25.6482	25.2977
	0.407686	0.118219	Q9C0C2	Q9C0C2	182 kDa tankyrase-1-binding protein	TNKS1BP1	Color2 [DarkGray]	1	4					20	20	20	15	15	15	181.79	0	61.904	436390000	54	26.0685	25.9829	25.9254	25.8037	25.7181	26.1003
	0.051397	-0.0191091	Q9C0C9	Q9C0C9	E2/E3 hybrid ubiquitin-protein ligase UBE2O	UBE2O	Color2 [DarkGray]	1	4					14	14	14	16.2	16.2	16.2	141.29	0	44.326	439080000	36	26.0551	25.6837	25.9334	25.895	26.0312	25.8032
	0.347208	0.578287	Q9GZN8	Q9GZN8	UPF0687 protein C20orf27	C20orf27	Color2 [DarkGray]	1	4					4	4	4	31.6	31.6	31.6	19.291	0	12.565	214530000	14	25.4292	24.708	24.9432	23.1508	24.9161	25.2787
	1.68885	-0.502887	Q9GZS3	Q9GZS3	WD repeat-containing protein 61;WD repeat-containing protein 61, N-terminally processed	WDR61	Color2 [DarkGray]	1	4					9	9	9	51.8	51.8	51.8	33.58	0	39.25	552840000	36	26.1114	25.935	25.8285	26.4208	26.6636	26.2993
	0.564905	-0.304326	Q9GZT3	Q9GZT3	SRA stem-loop-interacting RNA-binding protein, mitochondrial	SLIRP	Color2 [DarkGray]	1	4					9	9	9	78	78	78	12.349	0	50.079	2134900000	62	27.549	28.2285	28.2693	28.3751	28.3683	28.2164
	0.10513	0.0422802	Q9GZZ1	Q9GZZ1	N-alpha-acetyltransferase 50	NAA50	Color2 [DarkGray]	1	4					9	9	9	50.9	50.9	50.9	19.398	0	40.594	513510000	47	26.3138	25.9411	26.1469	26.2086	26.167	25.8994
	0.749845	-0.406865	Q9H074	Q9H074	Polyadenylate-binding protein-interacting protein 1	PAIP1	Color2 [DarkGray]	1	4					5	5	5	9.6	9.6	9.6	53.524	0	12.732	195520000	20	24.1902	24.8805	24.3346	24.7982	25.1359	24.6918
	1.0151	-0.417534	Q9H098	Q9H098	Protein FAM107B	FAM107B	Color2 [DarkGray]	1	4					4	4	4	32.8	32.8	32.8	15.558	0	13.936	157180000	16	23.9618	24.1421	24.4661	24.6346	24.3796	24.8084
	1.01919	-0.181484	Q9H0D6	Q9H0D6	5-3 exoribonuclease 2	XRN2	Color2 [DarkGray]	1	4					20	20	20	26	26	26	108.58	0	67.947	599360000	64	26.238	26.1602	26.2572	26.475	26.2437	26.4811
	1.20835	0.322347	Q9H0E2	Q9H0E2	Toll-interacting protein	TOLLIP	Color2 [DarkGray]	1	4					3	3	3	13.1	13.1	13.1	30.281	0	21.509	196850000	15	24.9881	24.8789	24.9619	24.6158	24.8325	24.4136
	0.568355	-0.1745	Q9H0U3	Q9H0U3	Magnesium transporter protein 1	MAGT1	Color2 [DarkGray]	1	4					5	5	5	15.2	15.2	15.2	38.036	0	31.733	350350000	22	25.4209	25.4313	25.6127	25.6296	25.8877	25.471
	1.51839	0.426149	Q9H0U4;Q92928	Q9H0U4	Ras-related protein Rab-1B	RAB1B	Color2 [DarkGray]	1	4					9	4	4	62.2	31.3	31.3	22.171	0	39.503	1012200000	17	27.4381	27.5424	27.1192	26.8912	26.967	26.9631
	0.213272	0.172222	Q9H299	Q9H299	SH3 domain-binding glutamic acid-rich-like protein 3	SH3BGRL3	Color2 [DarkGray]	1	4					3	3	3	31.2	31.2	31.2	10.438	0	45.694	908720000	17	27.4722	27.1388	26.5416	26.57	27.0002	27.0656
	1.13702	0.44298	Q9H2G2;O94804	Q9H2G2	STE20-like serine/threonine-protein kinase	SLK	Color2 [DarkGray]	1	4					14	14	14	13.3	13.3	13.3	142.69	0	31.483	346250000	41	26.0649	25.602	25.8856	25.474	25.1675	25.582
	0.689102	-0.302805	Q9H2J4	Q9H2J4	Phosducin-like protein 3	PDCL3	Color2 [DarkGray]	1	4					9	9	9	53.6	53.6	53.6	27.614	0	32.871	169560000	25	24.0264	24.5144	24.4674	24.4193	24.8553	24.6421
	0.375921	-0.252883	Q9H2U2	Q9H2U2	Inorganic pyrophosphatase 2, mitochondrial	PPA2	Color2 [DarkGray]	1	4					9	9	9	38.3	38.3	38.3	37.92	0	35.198	719560000	43	26.6959	26.7617	25.8883	26.6697	26.7567	26.6781
	0.346584	0.313692	Q9H2V7	Q9H2V7	Protein spinster homolog 1	SPNS1	Color2 [DarkGray]	1	4					2	2	2	5.3	5.3	5.3	56.629	0	8.2647	47289000	9	23.3238	24.1966	23.0702	23.5231	23.1163	23.0101
	0.256398	0.123717	Q9H2W6	Q9H2W6	39S ribosomal protein L46, mitochondrial	MRPL46	Color2 [DarkGray]	1	4					5	5	5	23.7	23.7	23.7	31.705	0	44.248	216030000	15	24.9707	25.3002	24.7097	24.7381	24.8367	25.0347
	0.399148	-0.195473	Q9H330	Q9H330	Transmembrane protein 245	TMEM245	Color2 [DarkGray]	1	4					3	3	3	3.8	3.8	3.8	100.94	0	9.4645	78821000	11	23.715	23.8958	23.2585	23.7741	23.7013	23.9803
	0.338559	-0.0580355	Q9H3K6	Q9H3K6	BolA-like protein 2	BOLA2	Color2 [DarkGray]	1	4					6	6	6	80.2	80.2	80.2	10.116	0	30.361	1387300000	42	27.4904	27.6176	27.6342	27.5485	27.6314	27.7364
	1.7199	-0.450089	Q9H3N1	Q9H3N1	Thioredoxin-related transmembrane protein 1	TMX1	Color2 [DarkGray]	1	4					7	7	7	23.6	23.6	23.6	31.791	0	34.379	1329600000	44	27.3876	27.1142	27.311	27.7612	27.8455	27.5562
	0.124863	-0.0593052	Q9H3P7	Q9H3P7	Golgi resident protein GCP60	ACBD3	Color2 [DarkGray]	1	4					8	8	8	23.5	23.5	23.5	60.593	0	94.006	354890000	27	25.4098	25.7043	25.5956	25.5942	25.3868	25.9066
	0.755856	0.225009	Q9H3U1	Q9H3U1	Protein unc-45 homolog A	UNC45A	Color2 [DarkGray]	1	4					17	17	17	22.1	22.1	22.1	103.08	0	51.096	498030000	50	26.2281	26.0805	26.2448	26.093	25.7066	26.0788
	0.024385	-0.0168438	Q9H444;P59074;Q96CF2	Q9H444	Charged multivesicular body protein 4b	CHMP4B	Color2 [DarkGray]	1	4					7	7	7	33.5	33.5	33.5	24.95	0	43.738	638200000	32	26.3327	26.288	26.6881	26.7083	26.0738	26.5771
	0.718823	0.322349	Q9H488	Q9H488	GDP-fucose protein O-fucosyltransferase 1	POFUT1	Color2 [DarkGray]	1	4					7	7	7	25	25	25	43.955	0	33.978	353310000	24	25.9215	25.6076	25.6134	25.6839	25.4187	25.0728
	1.23007	-0.18275	Q9H4A4	Q9H4A4	Aminopeptidase B	RNPEP	Color2 [DarkGray]	1	4					20	20	20	44.5	44.5	44.5	72.595	0	80.91	1465100000	92	27.4886	27.5857	27.5795	27.7222	27.8474	27.6324
	0.519385	0.40392	Q9H4G0	Q9H4G0	Band 4.1-like protein 1	EPB41L1	Color2 [DarkGray]	1	4					8	7	7	12	10.7	10.7	98.502	0	16.872	132090000	19	24.7696	24.5865	23.8048	23.9213	24.3045	23.7233
	1.1764	0.211526	Q9H4M9;Q9NZN3	Q9H4M9	EH domain-containing protein 1	EHD1	Color2 [DarkGray]	1	4					32	32	28	70.2	70.2	63.5	60.626	0	205.15	3900300000	162	29.1556	29.1096	29.3274	28.8811	29.0376	29.0394
	1.75435	-0.339492	Q9H6S3	Q9H6S3	Epidermal growth factor receptor kinase substrate 8-like protein 2	EPS8L2	Color2 [DarkGray]	1	4					14	14	14	27.6	27.6	27.6	80.62	0	42.606	442260000	39	25.7482	25.8013	25.6576	25.9519	26.0587	26.215
	0.650811	-0.137351	Q9H6T3	Q9H6T3	RNA polymerase II-associated protein 3	RPAP3	Color2 [DarkGray]	1	4					17	17	17	29.9	29.9	29.9	75.718	0	59.172	339630000	37	25.6195	25.4859	25.366	25.643	25.7254	25.5151
	0.877704	-0.422848	Q9H6Z4	Q9H6Z4	Ran-binding protein 3	RANBP3	Color2 [DarkGray]	1	4					5	5	5	10.4	10.4	10.4	60.209	0	16.716	134160000	16	24.0816	23.7443	24.4967	24.639	24.4674	24.4848
	0.919518	-0.208206	Q9H773	Q9H773	dCTP pyrophosphatase 1	DCTPP1	Color2 [DarkGray]	1	4					8	8	8	38.2	38.2	38.2	18.681	0	28.189	584810000	41	26.0825	26.2117	26.3528	26.4915	26.4989	26.2812
	0.456797	-1.08758	Q9H7Z7	Q9H7Z7	Prostaglandin E synthase 2;Prostaglandin E synthase 2 truncated form	PTGES2	Color2 [DarkGray]	1	4					8	8	8	27.9	27.9	27.9	41.943	0	58.442	370490000	20	22.6718	25.7688	25.7264	25.905	25.8195	25.7052
	0.3128	0.542841	Q9H832	Q9H832	Ubiquitin-conjugating enzyme E2 Z	UBE2Z	Color2 [DarkGray]	1	4					10	10	10	26.3	26.3	26.3	38.21	0	37.243	319600000	28	25.8031	25.4381	25.9745	25.7797	23.8186	25.989
	0.208494	-0.139813	Q9H8S9;Q7L9L4	Q9H8S9;Q7L9L4	MOB kinase activator 1A;MOB kinase activator 1B	MOB1A;MOB1B	Color2 [DarkGray]	1	4					5	5	5	25.9	25.9	25.9	25.079	0	25.764	368490000	21	25.7646	25.176	25.7991	25.9069	25.3954	25.8567
	0.00523078	0.00355975	Q9H8Y8	Q9H8Y8	Golgi reassembly-stacking protein 2	GORASP2	Color2 [DarkGray]	1	4					4	4	4	12.4	12.4	12.4	47.145	0	13.52	272460000	18	25.1121	25.2034	25.1867	25.3679	25.4017	24.7218
	1.13393	-0.385348	Q9H910	Q9H910	Hematological and neurological expressed 1-like protein	HN1L	Color2 [DarkGray]	1	4					7	7	7	47.4	47.4	47.4	20.063	0	37.889	641850000	34	25.9973	26.4098	26.2433	26.7421	26.6695	26.3947
	0.342441	-0.264304	Q9H9A6	Q9H9A6	Leucine-rich repeat-containing protein 40	LRRC40	Color2 [DarkGray]	1	4					5	5	5	10.5	10.5	10.5	68.249	0	28.55	80650000	15	23.8959	23.3951	23.2358	23.3637	23.7295	24.2264
	0.368357	0.121735	Q9H9B4	Q9H9B4	Sideroflexin-1	SFXN1	Color2 [DarkGray]	1	4					9	9	9	33.2	33.2	33.2	35.619	0	28.126	382340000	27	25.6352	25.9456	25.9546	25.7965	25.8291	25.5446
	0.338896	-0.112883	Q9HA64	Q9HA64	Ketosamine-3-kinase	FN3KRP	Color2 [DarkGray]	1	4					5	5	5	16.5	16.5	16.5	34.412	0	24.765	184610000	18	24.8084	24.4726	24.3992	24.7425	24.7132	24.5631
	0.764753	0.214673	Q9HAV4	Q9HAV4	Exportin-5	XPO5	Color2 [DarkGray]	1	4					15	15	15	15.1	15.1	15.1	136.31	0	46.051	331380000	39	25.7658	25.7556	25.4647	25.3823	25.347	25.6127
	0.259161	0.129161	Q9HB07	Q9HB07	UPF0160 protein MYG1, mitochondrial	C12orf10	Color2 [DarkGray]	1	4					9	9	9	31.6	31.6	31.6	42.449	0	41.628	746380000	38	27.0795	26.6102	26.4484	26.4665	26.6619	26.6221
	0.863864	-0.355568	Q9HB71	Q9HB71	Calcyclin-binding protein	CACYBP	Color2 [DarkGray]	1	4					18	18	18	71.5	71.5	71.5	26.21	0	171.48	5467800000	100	29.6507	29.477	29.0264	29.7685	29.8005	29.6518
	0.0862552	-0.0499331	Q9HBI6;Q08477;P78329;Q9HCS2;P98187	Q9HBI6;Q08477	Phylloquinone omega-hydroxylase CYP4F11;Docosahexaenoic acid omega-hydroxylase CYP4F3	CYP4F11;CYP4F3	Color2 [DarkGray]	1	4					6	6	6	15.6	15.6	15.6	60.145	0	25.757	207390000	25	24.8457	25.0829	24.3896	24.8662	24.7696	24.8322
	1.4572	0.424709	Q9HC35	Q9HC35	Echinoderm microtubule-associated protein-like 4	EML4	Color2 [DarkGray]	1	4					23	23	23	28.4	28.4	28.4	108.91	0	66.934	885260000	77	27.051	27.1889	27.3704	26.5876	26.8306	26.9179
	0.420126	-0.115131	Q9HC38	Q9HC38	Glyoxalase domain-containing protein 4	GLOD4	Color2 [DarkGray]	1	4					16	16	16	54.3	54.3	54.3	34.793	0	107.97	2686400000	76	28.6535	28.3345	28.5917	28.7695	28.5712	28.5845
	0.213341	-0.184149	Q9HCE1	Q9HCE1	Putative helicase MOV-10	MOV10	Color2 [DarkGray]	1	4					4	4	4	4	4	4	113.67	0	7.9163	101300000	14	23.0843	24.0535	23.8495	23.7182	24.1625	23.659
	0.335248	-0.159589	Q9HD45	Q9HD45	Transmembrane 9 superfamily member 3	TM9SF3	Color2 [DarkGray]	1	4					10	10	10	21.2	21.2	21.2	67.887	0	85.215	625680000	40	26.1183	26.283	26.6067	26.2453	26.7046	26.5369
	1.09504	0.21526	Q9HDC9	Q9HDC9	Adipocyte plasma membrane-associated protein	APMAP	Color2 [DarkGray]	1	4					17	17	17	48.8	48.8	48.8	46.48	0	197.24	2980100000	77	28.6695	28.8077	28.9857	28.6173	28.5799	28.62
	1.43417	0.236425	Q9NP72	Q9NP72	Ras-related protein Rab-18	RAB18	Color2 [DarkGray]	1	4					10	10	10	58.3	58.3	58.3	22.977	0	62.074	773320000	32	26.7898	26.7653	26.8676	26.5556	26.6998	26.4581
	0.0720925	-0.0269839	Q9NP79	Q9NP79	Vacuolar protein sorting-associated protein VTA1 homolog	VTA1	Color2 [DarkGray]	1	4					8	8	8	33.9	33.9	33.9	33.879	0	69.474	662400000	40	26.341	26.5248	26.7019	26.5349	26.6943	26.4194
	0.896294	0.334503	Q9NP81	Q9NP81	Serine--tRNA ligase, mitochondrial	SARS2	Color2 [DarkGray]	1	4					10	10	10	28	28	28	58.282	0	47.534	368720000	34	25.5218	25.8452	26.1065	25.5627	25.4206	25.4867
	0.508905	0.223491	Q9NP97;Q8TF09	Q9NP97;Q8TF09	Dynein light chain roadblock-type 1;Dynein light chain roadblock-type 2	DYNLRB1;DYNLRB2	Color2 [DarkGray]	1	4					4	4	4	60.4	60.4	60.4	10.921	0	31.474	493620000	19	26.3977	26.1946	25.8743	25.7804	26.163	25.8526
	0.280096	-0.172456	Q9NPF4	Q9NPF4	Probable tRNA N6-adenosine threonylcarbamoyltransferase	OSGEP	Color2 [DarkGray]	1	4					7	7	7	32.8	32.8	32.8	36.426	0	24.392	111410000	17	24.0165	24.1834	23.5029	23.8362	24.3191	24.0647
	0.216764	-0.086813	Q9NPQ8	Q9NPQ8	Synembryn-A	RIC8A	Color2 [DarkGray]	1	4					10	10	10	25.2	25.2	25.2	59.709	0	26.162	755790000	23	26.3193	26.5746	26.6808	26.5665	26.826	26.4426
	0.489712	-0.730564	Q9NQ29	Q9NQ29	Putative RNA-binding protein Luc7-like 1	LUC7L	Color2 [DarkGray]	1	4					8	5	5	24	13.5	13.5	43.727	0	13.174	151970000	17	24.7248	22.6107	24.3144	24.7201	24.5209	24.6007
	0.42284	-0.3351	Q9NQ88	Q9NQ88	Fructose-2,6-bisphosphatase TIGAR	TIGAR	Color2 [DarkGray]	1	4					5	5	5	21.1	21.1	21.1	30.062	0	17.926	266910000	23	24.4703	25.0742	25.3696	25.1817	25.0208	25.7169
	0.727472	0.282871	Q9NQC3	Q9NQC3	Reticulon-4	RTN4	Color2 [DarkGray]	1	4					6	6	6	7.6	7.6	7.6	129.93	0	78.769	2811500000	48	28.5889	28.656	29.1496	28.5498	28.5193	28.4766
	0.483753	0.205214	Q9NQR4	Q9NQR4	Omega-amidase NIT2	NIT2	Color2 [DarkGray]	1	4					13	13	13	70.7	70.7	70.7	30.608	0	157.97	1211300000	55	27.7624	27.3004	27.3791	27.3033	27.4626	27.0604
	1.51664	0.722676	Q9NQW7;O00462	Q9NQW7	Xaa-Pro aminopeptidase 1	XPNPEP1	Color2 [DarkGray]	1	4					10	10	10	22.8	22.8	22.8	69.917	0	27.552	636710000	30	27.0685	26.5774	26.759	26.1396	26.3333	25.764
	0.23745	0.0442422	Q9NR09;REV__Q96C03;REV__Q9NR09	Q9NR09	Baculoviral IAP repeat-containing protein 6	BIRC6	Color2 [DarkGray]	1	4					13	13	13	3.3	3.3	3.3	530.25	0	24.859	167230000	24	24.6732	24.4943	24.4487	24.4817	24.5448	24.457
	0.604694	0.205715	Q9NR12	Q9NR12	PDZ and LIM domain protein 7	PDLIM7	Color2 [DarkGray]	1	4					8	8	8	28.4	28.4	28.4	49.844	0	31.047	294850000	31	25.4581	25.4932	25.4476	24.961	25.3679	25.4529
	0.46966	-0.215492	Q9NR28	Q9NR28	Diablo homolog, mitochondrial	DIABLO	Color2 [DarkGray]	1	4					6	6	6	26.4	26.4	26.4	27.131	0	21.605	468630000	25	26.0398	25.5709	26.0326	26.1373	26.2884	25.8641
	0.855675	-0.550508	Q9NR30;Q9BQ39	Q9NR30	Nucleolar RNA helicase 2	DDX21	Color2 [DarkGray]	1	4					15	15	15	25	25	25	87.343	0	59.327	383530000	34	24.8934	25.4109	25.8957	25.918	26.0941	25.8394
	1.10094	-0.219795	Q9NR31	Q9NR31	GTP-binding protein SAR1a	SAR1A	Color2 [DarkGray]	1	4					10	10	6	50.5	50.5	35.4	22.367	0	55.968	1282200000	38	27.2129	27.3498	27.5302	27.6221	27.5605	27.5696
	0.76342	0.302084	Q9NR45	Q9NR45	Sialic acid synthase	NANS	Color2 [DarkGray]	1	4					12	12	12	52.1	52.1	52.1	40.307	0	64.324	603110000	43	26.8049	26.6048	26.2403	26.3959	26.1411	26.2068
	0.495737	0.477853	Q9NR46	Q9NR46	Endophilin-B2	SH3GLB2	Color2 [DarkGray]	1	4					7	7	6	23.3	23.3	21.3	43.973	0	27.096	156780000	22	24.4153	24.7168	24.6339	24.5359	24.5074	23.2893
	0.407715	-0.69205	Q9NRF8	Q9NRF8	CTP synthase 2	CTPS2	Color2 [DarkGray]	1	4					7	5	5	19.6	15.2	15.2	65.677	0	19.282	280290000	16	25.5002	25.0461	23.2539	25.4549	25.5658	24.8556
	0.500627	-0.338247	Q9NRN7	Q9NRN7	L-aminoadipate-semialdehyde dehydrogenase-phosphopantetheinyl transferase	AASDHPPT	Color2 [DarkGray]	1	4					7	7	7	25.6	25.6	25.6	35.776	0	16.974	127300000	20	23.8481	24.003	24.3412	24.1783	24.9147	24.1141
	0.673058	1.28128	Q9NRV9	Q9NRV9	Heme-binding protein 1	HEBP1	Color2 [DarkGray]	1	4					6	6	6	41.3	41.3	41.3	21.097	0	23.577	326580000	25	26.0071	25.9298	25.8098	25.5038	25.4893	22.9098
	0.259106	0.383535	Q9NRX2	Q9NRX2	39S ribosomal protein L17, mitochondrial	MRPL17	Color2 [DarkGray]	1	4					3	3	3	18.9	18.9	18.9	20.05	0	24.149	132840000	15	24.6023	24.2666	23.8643	22.7701	24.5207	24.2917
	1.07362	-0.484845	Q9NRX4	Q9NRX4	14 kDa phosphohistidine phosphatase	PHPT1	Color2 [DarkGray]	1	4					4	4	4	47.2	47.2	47.2	13.832	0	36.539	974330000	34	26.8642	26.9638	26.4552	27.1054	27.5347	27.0977
	1.20951	0.121973	Q9NSD9	Q9NSD9	Phenylalanine--tRNA ligase beta subunit	FARSB	Color2 [DarkGray]	1	4					22	22	22	38.9	38.9	38.9	66.115	0	79.772	2081000000	98	28.1822	28.3024	28.2389	28.1275	28.1704	28.0597
	0.244459	-0.0665258	Q9NSE4	Q9NSE4	Isoleucine--tRNA ligase, mitochondrial	IARS2	Color2 [DarkGray]	1	4					25	25	25	29.2	29.2	29.2	113.79	0	92.17	1778700000	98	27.9404	27.9285	27.8602	27.8459	28.1831	27.8997
	0.139487	0.0962499	Q9NT62	Q9NT62	Ubiquitin-like-conjugating enzyme ATG3	ATG3	Color2 [DarkGray]	1	4					7	7	7	26.8	26.8	26.8	35.864	0	25.571	274700000	18	25.3818	25.0477	25.4913	25.3653	24.781	25.4858
	0.60825	-0.266441	Q9NTJ3	Q9NTJ3	Structural maintenance of chromosomes protein 4	SMC4	Color2 [DarkGray]	1	4					30	30	30	27.7	27.7	27.7	147.18	0	86.678	770300000	88	26.8599	26.6234	26.2297	26.9691	26.734	26.8093
	0.0173169	-0.00332769	Q9NTK5	Q9NTK5	Obg-like ATPase 1	OLA1	Color2 [DarkGray]	1	4					21	21	21	60.6	60.6	60.6	44.743	0	128.36	3710200000	103	29.0991	28.9983	28.9447	28.9973	28.9515	29.1033
	0.131027	-0.0553525	Q9NTZ6	Q9NTZ6	RNA-binding protein 12	RBM12	Color2 [DarkGray]	1	4					13	13	13	14.8	14.8	14.8	97.394	0	24.154	258680000	27	25.1707	25.1283	24.9748	25.4086	24.9143	25.117
	1.03855	-0.323486	Q9NUJ1	Q9NUJ1	Mycophenolic acid acyl-glucuronide esterase, mitochondrial	ABHD10	Color2 [DarkGray]	1	4					10	10	10	42.5	42.5	42.5	33.932	0	37.087	337810000	34	25.4686	25.4695	25.0896	25.604	25.8125	25.5816
	0.251729	-0.13565	Q9NUP9;O14910;Q9HAP6	Q9NUP9	Protein lin-7 homolog C	LIN7C	Color2 [DarkGray]	1	4					5	5	5	26.4	26.4	26.4	21.834	0	11.887	80998000	16	23.3056	23.8614	23.511	23.8397	23.8284	23.4168
	0.260349	-0.0786915	Q9NUU7;Q9UHL0	Q9NUU7	ATP-dependent RNA helicase DDX19A	DDX19A	Color2 [DarkGray]	1	4					16	16	4	39.1	39.1	9.8	53.974	0	83.051	918880000	51	27.0741	27.0747	26.7299	26.9728	27.0441	27.0979
	0.644132	-0.65146	Q9NVA2;Q92599	Q9NVA2	Septin-11	2011-09-01	Color2 [DarkGray]	1	4					10	10	5	27.3	27.3	14.5	49.398	0	33.757	450130000	39	24.7761	25.8919	25.7158	25.8632	26.7057	25.7693
	0.284776	-0.0629826	Q9NVJ2	Q9NVJ2	ADP-ribosylation factor-like protein 8B	ARL8B	Color2 [DarkGray]	1	4					6	6	3	40.3	40.3	13.4	21.539	0	89.453	1129000000	35	27.3316	27.2332	27.3367	27.2932	27.5281	27.2692
	0.220621	0.444757	Q9NWV4	Q9NWV4	UPF0587 protein C1orf123	C1orf123	Color2 [DarkGray]	1	4					3	3	3	25.6	25.6	25.6	18.048	0	15.465	153410000	13	24.8555	24.4769	24.3119	24.8027	24.9405	22.5668
	0.462456	0.187309	Q9NX02;Q8WX94	Q9NX02	NACHT, LRR and PYD domains-containing protein 2	NLRP2	Color2 [DarkGray]	1	4					13	13	13	15.8	15.8	15.8	120.51	0	37.223	291000000	26	25.3737	25.2117	25.6504	25.2692	25.4053	24.9994
	1.23687	0.291856	Q9NY33	Q9NY33	Dipeptidyl peptidase 3	DPP3	Color2 [DarkGray]	1	4					16	16	16	31.9	31.9	31.9	82.588	0	84.154	809350000	65	27.0507	26.9855	27.0138	26.9324	26.5621	26.68
	0.140621	-0.0528138	Q9NYF8	Q9NYF8	Bcl-2-associated transcription factor 1	BCLAF1	Color2 [DarkGray]	1	4					7	7	7	10.2	10.2	10.2	106.12	0	20.202	788920000	30	26.7573	26.6796	26.6693	26.796	26.9676	26.501
	0.438384	-0.171637	Q9NYL9;P28289	Q9NYL9	Tropomodulin-3	TMOD3	Color2 [DarkGray]	1	4					15	15	15	52.6	52.6	52.6	39.594	0	73.833	1006100000	55	26.7281	26.9502	27.2631	27.0286	27.1841	27.2434
	0.829457	0.2558	Q9NYU2;Q9NYU1	Q9NYU2	UDP-glucose:glycoprotein glucosyltransferase 1	UGGT1	Color2 [DarkGray]	1	4					37	37	37	32	32	32	177.19	0	256.15	2820900000	148	28.9028	28.6935	28.6057	28.36	28.7033	28.3713
	1.47942	-0.650304	Q9NZ01	Q9NZ01	Very-long-chain enoyl-CoA reductase	TECR	Color2 [DarkGray]	1	4					9	9	9	23.1	23.1	23.1	36.034	0	27.459	577290000	35	25.6359	26.2105	25.785	26.3289	26.7045	26.5489
	0.403666	0.209582	Q9NZB2;Q5T035	Q9NZB2	Constitutive coactivator of PPAR-gamma-like protein 1	FAM120A	Color2 [DarkGray]	1	4					15	15	15	19.9	19.9	19.9	121.89	0	52.106	387630000	42	26.0331	25.6137	25.9962	25.5095	25.4847	26.02
	1.59358	-0.337818	Q9NZI8;REV__Q15833;Q15517	Q9NZI8	Insulin-like growth factor 2 mRNA-binding protein 1	IGF2BP1	Color2 [DarkGray]	1	4					20	20	18	39.5	39.5	35.5	63.48	0	165.04	4067100000	118	29.0151	28.8486	28.9546	29.2089	29.4447	29.1782
	0.592271	0.331523	Q9NZL4	Q9NZL4	Hsp70-binding protein 1	HSPBP1	Color2 [DarkGray]	1	4					11	11	11	45.9	45.9	45.9	39.474	0	73.396	907680000	42	27.3924	27.1921	26.9769	26.4333	27.1706	26.9629
	1.85161	-0.262825	Q9NZL9	Q9NZL9	Methionine adenosyltransferase 2 subunit beta	MAT2B	Color2 [DarkGray]	1	4					10	10	10	39.5	39.5	39.5	37.551	0	39.748	660680000	66	26.2577	26.3918	26.4252	26.563	26.6894	26.6108
	1.42192	0.178678	Q9NZM1;O75923	Q9NZM1	Myoferlin	MYOF	Color2 [DarkGray]	1	4					88	88	88	50.7	50.7	50.7	234.71	0	323.31	8163700000	374	30.1728	30.2599	30.3131	30.0407	30.1524	30.0166
	1.58009	-0.461892	Q9NZN4	Q9NZN4	EH domain-containing protein 2	EHD2	Color2 [DarkGray]	1	4					15	14	13	35.4	33.7	31.9	61.161	0	65.863	668810000	40	26.1867	26.0839	26.4684	26.7264	26.8184	26.5799
	0.566091	0.135983	Q9NZT2	Q9NZT2	Opioid growth factor receptor	OGFR	Color2 [DarkGray]	1	4					3	3	3	5.5	5.5	5.5	73.324	0	12.096	138500000	17	24.299	24.2554	24.4701	24.3722	24.1438	24.1006
	0.157126	0.0803293	Q9NZU5	Q9NZU5	LIM and cysteine-rich domains protein 1	LMCD1	Color2 [DarkGray]	1	4					14	14	14	45.5	45.5	45.5	40.832	0	50.6	563580000	47	26.1655	26.3764	26.2939	26.3862	25.8356	26.3731
	0.247625	-0.119505	Q9NZW5;Q14168	Q9NZW5	MAGUK p55 subfamily member 6	MPP6	Color2 [DarkGray]	1	4					9	8	8	17.8	16.5	16.5	61.116	0	14.896	78535000	11	23.3184	23.4322	23.368	23.567	23.7745	23.1357
	0.494978	-0.206299	Q9P035	Q9P035	Very-long-chain (3R)-3-hydroxyacyl-CoA dehydratase 3	HACD3	Color2 [DarkGray]	1	4					11	11	11	31.8	31.8	31.8	43.159	0	68.865	1171200000	36	27.1416	27.2001	27.2456	27.1914	27.7587	27.2561
	0.408637	0.391846	Q9P0K7	Q9P0K7	Ankycorbin	RAI14	Color2 [DarkGray]	1	4					12	12	12	16.8	16.8	16.8	110.04	0	22.756	123700000	20	23.8836	24.7383	24.4447	24.3416	24.2236	23.3259
	0.545402	0.210839	Q9P0L0	Q9P0L0	Vesicle-associated membrane protein-associated protein A	VAPA	Color2 [DarkGray]	1	4					9	9	8	49.8	49.8	49.8	27.893	0	30.038	604010000	45	26.633	26.6935	26.2643	26.329	26.1314	26.4979
	1.34832	0.605855	Q9P287	Q9P287	BRCA2 and CDKN1A-interacting protein	BCCIP	Color2 [DarkGray]	1	4					8	8	8	31.8	31.8	31.8	35.979	0	68.768	796870000	37	27.394	27.1551	26.8535	26.3412	26.803	26.4407
	0.608614	-0.319532	Q9P2E9	Q9P2E9	Ribosome-binding protein 1	RRBP1	Color2 [DarkGray]	1	4					32	32	31	30.4	30.4	29.7	152.47	0	161.44	1222000000	107	26.8423	27.257	27.505	27.4046	27.789	27.3693
	0.572905	-0.0888354	Q9P2J5	Q9P2J5	Leucine--tRNA ligase, cytoplasmic	LARS	Color2 [DarkGray]	1	4					39	39	39	39.1	39.1	39.1	134.46	0	233.61	2969400000	136	28.6876	28.6962	28.4869	28.7265	28.695	28.7157
	0.621347	-0.198311	Q9P2R3	Q9P2R3	Rabankyrin-5	ANKFY1	Color2 [DarkGray]	1	4					18	18	18	22.8	22.8	22.8	128.4	0	84.913	628620000	61	26.4638	26.163	26.3983	26.4211	26.7612	26.4378
	1.85045	-0.37748	Q9P2R7	Q9P2R7	Succinyl-CoA ligase [ADP-forming] subunit beta, mitochondrial	SUCLA2	Color2 [DarkGray]	1	4					9	9	9	24	24	24	50.317	0	45.553	490380000	32	25.868	25.7093	26.0171	26.2536	26.2072	26.266
	0.3459	0.397014	Q9P2T1	Q9P2T1	GMP reductase 2	GMPR2	Color2 [DarkGray]	1	4					4	4	4	13.5	13.5	13.5	37.874	0	8.6569	72573000	10	24.0948	23.7124	22.96	23.5893	23.4701	22.5167
	0.680569	-0.880873	Q9UBB4	Q9UBB4	Ataxin-10	ATXN10	Color2 [DarkGray]	1	4					10	10	10	28.4	28.4	28.4	53.488	0	39.993	250460000	25	23.2909	25.0165	25.0391	25.3032	25.522	25.164
	1.54571	-0.463954	Q9UBE0	Q9UBE0	SUMO-activating enzyme subunit 1;SUMO-activating enzyme subunit 1, N-terminally processed	SAE1	Color2 [DarkGray]	1	4					15	15	15	57.2	57.2	57.2	38.449	0	148.81	2186600000	65	28.1638	27.7403	28.1037	28.5472	28.4221	28.4303
	0.700546	0.779222	Q9UBF2	Q9UBF2	Coatomer subunit gamma-2	COPG2	Color2 [DarkGray]	1	4					10	8	8	15.7	12.9	12.9	97.621	0	31.869	135260000	16	24.9708	24.3862	24.3281	24.192	22.8569	24.2987
	0.207652	0.071825	Q9UBI1	Q9UBI1	COMM domain-containing protein 3	COMMD3	Color2 [DarkGray]	1	4					6	6	6	41	41	41	22.151	0	31.171	352360000	22	25.8651	25.53	25.5949	25.7522	25.4584	25.5641
	0.69235	-0.258004	Q9UBI6	Q9UBI6	Guanine nucleotide-binding protein G(I)/G(S)/G(O) subunit gamma-12	GNG12	Color2 [DarkGray]	1	4					5	5	5	69.4	69.4	69.4	8.0061	0	44.366	1017700000	28	26.7266	27.0453	27.2469	27.3022	27.3739	27.1168
	0.746598	0.327027	Q9UBM7	Q9UBM7	7-dehydrocholesterol reductase	DHCR7	Color2 [DarkGray]	1	4					6	6	6	14.7	14.7	14.7	54.489	0	17.07	228270000	19	25.4867	25.2334	24.9133	24.6888	25.0825	24.881
	0.468194	-0.0969143	Q9UBQ0	Q9UBQ0	Vacuolar protein sorting-associated protein 29	VPS29	Color2 [DarkGray]	1	4					9	9	9	56	56	56	20.505	0	65.872	1853800000	53	27.9781	27.8881	27.9544	28.0913	28.1504	27.8697
	1.49275	-0.287153	Q9UBQ5	Q9UBQ5	Eukaryotic translation initiation factor 3 subunit K	EIF3K	Color2 [DarkGray]	1	4					9	9	9	51.8	51.8	51.8	25.059	0	36.227	1050200000	36	26.9147	27.1025	26.9624	27.3551	27.1426	27.3433
	0.223523	0.0650711	Q9UBQ7	Q9UBQ7	Glyoxylate reductase/hydroxypyruvate reductase	GRHPR	Color2 [DarkGray]	1	4					17	17	17	64.9	64.9	64.9	35.668	0	165.31	2633800000	76	28.5629	28.6336	28.5402	28.3458	28.7212	28.4744
	1.98851	-0.360383	Q9UBT2	Q9UBT2	SUMO-activating enzyme subunit 2	UBA2	Color2 [DarkGray]	1	4					24	24	24	48	48	48	71.223	0	190	3322200000	92	28.7446	28.5562	28.5678	28.9817	29.0706	28.8973
	0.898721	0.191302	Q9UG63	Q9UG63	ATP-binding cassette sub-family F member 2	ABCF2	Color2 [DarkGray]	1	4					14	14	14	23.3	23.3	23.3	71.289	0	41.03	866740000	53	27.195	26.864	27.0474	26.8825	26.856	26.7939
	0.699694	0.404817	Q9UGI8	Q9UGI8	Testin	TES	Color2 [DarkGray]	1	4					16	16	16	49.9	49.9	49.9	47.996	0	70.528	622780000	52	26.5428	26.3421	26.9381	26.5066	25.8328	26.2691
	0.953933	-0.224342	Q9UGV2	Q9UGV2	Protein NDRG3	NDRG3	Color2 [DarkGray]	1	4					9	9	9	41.1	41.1	41.1	41.408	0	45.751	430440000	32	25.8039	25.7557	25.6839	25.9948	26.1407	25.7811
	0.452787	0.185623	Q9UH65	Q9UH65	Switch-associated protein 70	SWAP70	Color2 [DarkGray]	1	4					13	13	13	30.3	30.3	30.3	68.997	0	38.45	322540000	39	25.4475	25.5605	25.6959	25.7039	25.2456	25.1976
	0.808005	0.20585	Q9UHB9	Q9UHB9	Signal recognition particle subunit SRP68	SRP68	Color2 [DarkGray]	1	4					23	23	23	43.4	43.4	43.4	70.729	0	175.18	1359900000	74	27.7546	27.4542	27.7662	27.5696	27.3846	27.4033
	1.63773	-0.568074	Q9UHD1	Q9UHD1	Cysteine and histidine-rich domain-containing protein 1	CHORDC1	Color2 [DarkGray]	1	4					14	14	14	57.8	57.8	57.8	37.489	0	128.59	2291800000	64	27.9579	27.7189	28.1675	28.3374	28.5754	28.6358
	1.20442	-0.421905	Q9UHD8	Q9UHD8	Septin-9	2009-09-01	Color2 [DarkGray]	1	4					12	12	12	34.5	34.5	34.5	65.401	0	50.858	577590000	39	26.1018	25.9416	26.0488	26.3449	26.7633	26.2497
	0.775658	0.264748	Q9UHD9	Q9UHD9	Ubiquilin-2	UBQLN2	Color2 [DarkGray]	1	4					8	5	5	19.7	13	13	65.695	0	42.114	335340000	22	25.7933	25.3457	25.8318	25.4073	25.4168	25.3525
	1.70988	-0.488848	Q9UHG3	Q9UHG3	Prenylcysteine oxidase 1	PCYOX1	Color2 [DarkGray]	1	4					16	16	16	41.8	41.8	41.8	56.639	0	90.336	1405000000	61	27.2661	27.3016	27.272	27.7514	28.0004	27.5545
	0.610207	0.404441	Q9UHN6	Q9UHN6	Transmembrane protein 2	TMEM2	Color2 [DarkGray]	1	4					8	8	8	6.8	6.8	6.8	154.37	0	18.211	174170000	25	24.564	25.1667	24.7618	23.9775	24.7911	24.5106
	0.220002	0.111617	Q9UHV9	Q9UHV9	Prefoldin subunit 2	PFDN2	Color2 [DarkGray]	1	4					7	7	7	47.4	47.4	47.4	16.648	0	31.592	893610000	28	27.1636	26.98	26.889	27.0452	27.1122	26.5404
	0.0660934	0.0227833	Q9UHX1	Q9UHX1	Poly(U)-binding-splicing factor PUF60	PUF60	Color2 [DarkGray]	1	4					12	12	12	33.1	33.1	33.1	59.875	0	74.175	668310000	52	26.5913	26.5694	26.4471	26.7326	26.4376	26.3694
	0.78808	0.557402	Q9UHY1	Q9UHY1	Nuclear receptor-binding protein	NRBP1	Color2 [DarkGray]	1	4					3	3	3	9.3	9.3	9.3	59.844	0	20.889	159510000	14	24.6481	24.8097	24.6653	24.4777	24.4676	23.5055
	0.0681704	-0.0228926	Q9UHY7	Q9UHY7	Enolase-phosphatase E1	ENOPH1	Color2 [DarkGray]	1	4					2	2	2	16.1	16.1	16.1	28.932	0	39.235	499460000	15	26.2075	26.204	25.862	26.1539	26.1201	26.0682
	0.870015	0.123226	Q9UIA9;Q9H2T7	Q9UIA9	Exportin-7	XPO7	Color2 [DarkGray]	1	4					23	23	23	25.1	25.1	25.1	123.91	0	81.349	862370000	74	26.9633	26.9615	26.9131	26.8434	26.9215	26.7033
	1.15781	0.27707	Q9UJ70	Q9UJ70	N-acetyl-D-glucosamine kinase	NAGK	Color2 [DarkGray]	1	4					11	11	11	41.9	41.9	41.9	37.375	0	44.462	631350000	46	26.6252	26.4978	26.7839	26.425	26.2065	26.4442
	0.00256311	0.00178274	Q9UJA5	Q9UJA5	tRNA (adenine(58)-N(1))-methyltransferase non-catalytic subunit TRM6	TRMT6	Color2 [DarkGray]	1	4					9	9	9	20.1	20.1	20.1	55.799	0	37.261	219830000	24	24.6585	25.0538	25.0554	24.8807	25.2593	24.6225
	0.789306	0.703719	Q9UJS0	Q9UJS0	Calcium-binding mitochondrial carrier protein Aralar2	SLC25A13	Color2 [DarkGray]	1	4					9	9	7	16.1	16.1	12.7	74.175	0	36.63	174500000	19	24.4883	24.8233	25.3591	24.3857	24.6211	23.5527
	0.384655	0.187558	Q9UJU6	Q9UJU6	Drebrin-like protein	DBNL	Color2 [DarkGray]	1	4					10	10	10	27.9	27.9	27.9	48.207	0	73.782	505460000	33	26.2129	26.0455	26.5344	25.7839	26.2065	26.2397
	0.477667	-0.278318	Q9UJW0	Q9UJW0	Dynactin subunit 4	DCTN4	Color2 [DarkGray]	1	4					7	7	7	18.5	18.5	18.5	52.337	0	15.147	108640000	19	23.6424	23.6064	24.2967	23.8936	24.2534	24.2335
	0.636861	0.171418	Q9UJZ1	Q9UJZ1	Stomatin-like protein 2, mitochondrial	STOML2	Color2 [DarkGray]	1	4					10	10	10	43.3	43.3	43.3	38.534	0	114.16	692430000	41	26.6087	26.7903	26.6548	26.4385	26.7269	26.3742
	1.23103	-1.21277	Q9UKK3	Q9UKK3	Poly [ADP-ribose] polymerase 4	PARP4	Color2 [DarkGray]	1	4					8	8	8	6.1	6.1	6.1	192.59	0	16.281	131930000	21	22.4387	23.7386	23.7402	24.6805	24.6801	24.1952
	0.0840746	0.0515893	Q9UKK9	Q9UKK9	ADP-sugar pyrophosphatase	NUDT5	Color2 [DarkGray]	1	4					12	12	12	64.4	64.4	64.4	24.327	0	66.203	1351200000	57	27.807	27.565	27.305	27.474	27.803	27.2453
	0.218447	-0.127066	Q9UKY7	Q9UKY7	Protein CDV3 homolog	CDV3	Color2 [DarkGray]	1	4					5	5	5	26.4	26.4	26.4	27.335	0	24.206	439560000	23	25.7175	26.1708	25.5317	25.6881	26.0332	26.0799
	0.0440068	-0.0304966	Q9UL46	Q9UL46	Proteasome activator complex subunit 2	PSME2	Color2 [DarkGray]	1	4					13	13	13	62.3	62.3	62.3	27.401	0	111.14	3536200000	74	28.9134	28.6462	29.2226	29.1577	28.6241	29.0919
	1.45925	0.460903	Q9ULV4	Q9ULV4	Coronin-1C	CORO1C	Color2 [DarkGray]	1	4					15	15	15	32.5	32.5	32.5	53.248	0	88.697	1506600000	43	28.2475	28.1075	27.7629	27.5381	27.5658	27.6313
	0.695609	-1.15822	Q9ULZ3	Q9ULZ3	Apoptosis-associated speck-like protein containing a CARD	PYCARD	Color2 [DarkGray]	1	4					8	8	8	39	39	39	21.627	0	21.523	261680000	22	22.8201	24.9716	25.1614	25.4949	25.6546	25.2783
	0.514426	0.210026	Q9UM54	Q9UM54	Unconventional myosin-VI	MYO6	Color2 [DarkGray]	1	4					10	10	10	9.4	9.4	9.4	149.69	0	24.612	96856000	17	23.8782	24.0039	24.4632	23.8647	23.9371	23.9134
	0.808653	0.244256	Q9UMS4	Q9UMS4	Pre-mRNA-processing factor 19	PRPF19	Color2 [DarkGray]	1	4					10	10	10	33.3	33.3	33.3	55.18	0	57.845	827690000	49	27.1412	26.9777	26.6995	26.796	26.6776	26.612
	0.0613289	-0.0450166	Q9UMX0	Q9UMX0	Ubiquilin-1	UBQLN1	Color2 [DarkGray]	1	4					10	10	6	23.3	23.3	16.3	62.518	0	121.66	1407000000	59	27.8216	27.6258	27.0067	27.4777	27.6636	27.4477
	0.349038	-0.521671	Q9UMX5	Q9UMX5	Neudesin	NENF	Color2 [DarkGray]	1	4					3	3	3	20.3	20.3	20.3	18.856	0	9.5559	141520000	10	23.9009	24.5405	22.5503	23.7825	24.378	24.3962
	0.0400417	0.0186278	Q9UMY4	Q9UMY4	Sorting nexin-12	SNX12	Color2 [DarkGray]	1	4					11	11	10	47.1	47.1	47.1	19.73	0	39.903	485020000	36	25.92	26.3225	25.9982	25.8967	26.2396	26.0486
	0.324619	-0.477386	Q9UN37	Q9UN37	Vacuolar protein sorting-associated protein 4A	VPS4A	Color2 [DarkGray]	1	4					8	8	7	25.6	25.6	22.9	48.897	0	24.598	244300000	26	25.417	24.9222	23.6768	25.4265	25.4937	24.5282
	0.346869	0.247342	Q9UN86	Q9UN86	Ras GTPase-activating protein-binding protein 2	G3BP2	Color2 [DarkGray]	1	4					10	9	9	26.6	24.1	24.1	54.12	0	38.745	332810000	32	25.5958	25.4364	26.1127	25.5006	25.0818	25.8206
	1.5612	-0.482945	Q9UNF0	Q9UNF0	Protein kinase C and casein kinase substrate in neurons protein 2	PACSIN2	Color2 [DarkGray]	1	4					9	9	9	23.5	23.5	23.5	55.738	0	36.388	365500000	34	25.0997	25.4808	25.4537	25.9001	25.6835	25.8995
	0.794913	-0.385643	Q9UNF1;Q9Y5V3;Q12816	Q9UNF1	Melanoma-associated antigen D2	MAGED2	Color2 [DarkGray]	1	4					15	15	15	31.5	31.5	31.5	64.953	0	39.559	346840000	36	25.4699	25.3312	25.1136	25.7759	25.9839	25.3118
	0.292266	0.0343208	Q9UNH7;Q86XE0	Q9UNH7	Sorting nexin-6;Sorting nexin-6, N-terminally processed	SNX6	Color2 [DarkGray]	1	4					12	12	12	28.3	28.3	28.3	46.648	0	40.466	759020000	49	26.727	26.8545	26.7189	26.7286	26.7659	26.7031
	0.283712	0.0751146	Q9UNM6	Q9UNM6	26S proteasome non-ATPase regulatory subunit 13	PSMD13	Color2 [DarkGray]	1	4					22	22	22	64.4	64.4	64.4	42.945	0	162.22	3743500000	105	29.1356	28.9883	28.9807	29.1098	28.983	28.7865
	0.0926536	-0.0943267	Q9UNN8	Q9UNN8	Endothelial protein C receptor	PROCR	Color2 [DarkGray]	1	4					4	4	4	20.6	20.6	20.6	26.671	0	18.951	251610000	18	25.4724	24.8479	24.7307	24.9098	25.6661	24.7579
	0.0870975	-0.0115019	Q9UNS2	Q9UNS2	COP9 signalosome complex subunit 3	COPS3	Color2 [DarkGray]	1	4					12	12	12	43.7	43.7	43.7	47.873	0	96.694	1055700000	42	27.2253	27.2186	27.1307	27.2653	27.2021	27.1418
	0.0262994	0.00316938	Q9UNZ2	Q9UNZ2	NSFL1 cofactor p47	NSFL1C	Color2 [DarkGray]	1	4					21	21	21	64.6	64.6	64.6	40.572	0	137.58	2334900000	101	28.3524	28.2879	28.3898	28.385	28.3449	28.2907
	0.580064	-0.395992	Q9UPN3	Q9UPN3	Microtubule-actin cross-linking factor 1, isoforms 1/2/3/5	MACF1	Color2 [DarkGray]	1	4					44	44	43	7.3	7.3	7.2	838.3	0	90.756	495120000	83	25.9583	25.574	25.8143	26.0461	26.7206	25.7679
	0.0251752	0.0613365	Q9UPN7	Q9UPN7	Serine/threonine-protein phosphatase 6 regulatory subunit 1	PPP6R1	Color2 [DarkGray]	1	4					3	3	3	5.2	5.2	5.2	96.723	0	21.634	195060000	12	25.0219	24.8493	23.3365	24.9239	23.1105	24.9893
	0.566112	-0.383022	Q9UPT5	Q9UPT5	Exocyst complex component 7	EXOC7	Color2 [DarkGray]	1	4					7	7	7	14.4	14.4	14.4	83.381	0	19.592	121970000	16	24.3299	24.228	23.7257	24.2028	24.2836	24.9463
	0.530963	-0.41312	Q9UPY5	Q9UPY5	Cystine/glutamate transporter	SLC7A11	Color2 [DarkGray]	1	4					2	2	2	5.8	5.8	5.8	55.422	0	14.106	80640000	11	23.6526	23.197	22.7048	23.5219	23.9871	23.2847
	1.29669	-0.97814	Q9UQ35	Q9UQ35	Serine/arginine repetitive matrix protein 2	SRRM2	Color2 [DarkGray]	1	4					16	16	16	8.4	8.4	8.4	299.61	0	62.99	500820000	37	25.2046	26.0082	25.0598	26.1823	26.7909	26.2338
	1.60609	0.274077	Q9UQ80	Q9UQ80	Proliferation-associated protein 2G4	PA2G4	Color2 [DarkGray]	1	4					27	27	27	76.9	76.9	76.9	43.786	0	323.31	9153600000	152	30.5917	30.374	30.4056	30.1881	30.2474	30.1135
	0.354771	-0.258287	Q9Y223	Q9Y223	Bifunctional UDP-N-acetylglucosamine 2-epimerase/N-acetylmannosamine kinase;UDP-N-acetylglucosamine 2-epimerase (hydrolyzing);N-acetylmannosamine kinase	GNE	Color2 [DarkGray]	1	4					8	8	8	13.3	13.3	13.3	79.274	0	34.845	125560000	19	24.3846	23.8585	23.546	23.8372	24.306	24.4208
	0.718192	0.211185	Q9Y224	Q9Y224	UPF0568 protein C14orf166	C14orf166	Color2 [DarkGray]	1	4					12	12	12	58.2	58.2	58.2	28.068	0	86.341	1204100000	45	27.4738	27.6437	27.5595	27.1106	27.5358	27.3971
	1.61636	0.157951	Q9Y230	Q9Y230	RuvB-like 2	RUVBL2	Color2 [DarkGray]	1	4					24	24	24	54.4	54.4	54.4	51.156	0	156.78	2956300000	116	28.7207	28.8217	28.7611	28.6498	28.6371	28.5428
	0.982462	-0.705748	Q9Y237	Q9Y237	Peptidyl-prolyl cis-trans isomerase NIMA-interacting 4	PIN4	Color2 [DarkGray]	1	4					6	6	6	61.8	61.8	61.8	13.81	0	12.986	250530000	25	24.8455	24.2116	24.874	25.0423	25.1437	25.8624
	0.999952	0.114573	Q9Y262	Q9Y262	Eukaryotic translation initiation factor 3 subunit L	EIF3L	Color2 [DarkGray]	1	4					23	23	23	43.4	43.4	43.4	66.726	0	130.61	3237800000	113	28.9509	28.777	28.9091	28.7505	28.7545	28.7883
	0.0792189	0.146905	Q9Y263	Q9Y263	Phospholipase A-2-activating protein	PLAA	Color2 [DarkGray]	1	4					11	11	11	19.1	19.1	19.1	87.156	0	56.572	200780000	19	25.0406	24.9992	23.5503	23.6664	24.3205	25.1625
	0.863058	0.243899	Q9Y265	Q9Y265	RuvB-like 1	RUVBL1	Color2 [DarkGray]	1	4					21	21	21	60.3	60.3	60.3	50.227	0	256.11	4434200000	108	29.5642	29.307	29.3366	29.104	29.3586	29.0135
	0.0599144	0.0397981	Q9Y266	Q9Y266	Nuclear migration protein nudC	NUDC	Color2 [DarkGray]	1	4					17	17	17	45.3	45.3	45.3	38.242	0	77.08	3298500000	99	28.6924	28.7957	29.0775	29.0388	28.4177	28.9897
	0.187154	-0.0743453	Q9Y281	Q9Y281	Cofilin-2	CFL2	Color2 [DarkGray]	1	4					11	7	7	71.1	48.2	48.2	18.736	0	63.849	1210600000	42	27.2798	27.4176	27.4521	27.607	27.1729	27.5926
	0.559349	0.167267	Q9Y285	Q9Y285	Phenylalanine--tRNA ligase alpha subunit	FARSA	Color2 [DarkGray]	1	4					12	12	12	34.3	34.3	34.3	57.563	0	70.775	1429200000	54	27.8672	27.6569	27.6214	27.4929	27.7567	27.3941
	1.17362	-0.224493	Q9Y295	Q9Y295	Developmentally-regulated GTP-binding protein 1	DRG1	Color2 [DarkGray]	1	4					9	9	9	31.3	31.3	31.3	40.542	0	33.191	457060000	20	25.9137	25.7781	25.7923	25.9566	26.2092	25.9918
	0.754029	0.277042	Q9Y2A7	Q9Y2A7	Nck-associated protein 1	NCKAP1	Color2 [DarkGray]	1	4					11	11	11	11.6	11.6	11.6	128.79	0	39.119	221550000	29	25.4007	24.9578	24.9758	24.8367	24.9839	24.6827
	0.105373	-0.0657349	Q9Y2B0	Q9Y2B0	Protein canopy homolog 2	CNPY2	Color2 [DarkGray]	1	4					7	7	7	43.4	43.4	43.4	20.652	0	43.407	671990000	32	26.2767	26.6136	26.57	26.5724	26.8858	26.1993
	0.603114	0.340801	Q9Y2Q3	Q9Y2Q3	Glutathione S-transferase kappa 1	GSTK1	Color2 [DarkGray]	1	4					8	8	8	47.8	47.8	47.8	25.497	0	54.365	611590000	33	26.8488	26.5156	26.1566	26.068	26.4706	25.9601
	0.402816	0.565945	Q9Y2S6	Q9Y2S6	Translation machinery-associated protein 7	TMA7	Color2 [DarkGray]	1	4					2	2	2	29.7	29.7	29.7	7.0662	0.00038536	5.5156	150900000	11	24.7968	24.8753	24.6351	24.7683	23.0215	24.8196
	0.485295	-0.262164	Q9Y2S7	Q9Y2S7	Polymerase delta-interacting protein 2	POLDIP2	Color2 [DarkGray]	1	4					8	8	8	26.4	26.4	26.4	42.033	0	23.193	305660000	30	24.9539	25.2549	25.4452	25.7169	25.1121	25.6115
	0.0943657	-0.0887807	Q9Y2V2	Q9Y2V2	Calcium-regulated heat stable protein 1	CARHSP1	Color2 [DarkGray]	1	4					3	3	3	42.9	42.9	42.9	15.892	0	41.411	567330000	18	26.5761	26.5089	25.5608	26.211	26.4503	26.2509
	0.00780068	-0.0030969	Q9Y2W1	Q9Y2W1	Thyroid hormone receptor-associated protein 3	THRAP3	Color2 [DarkGray]	1	4					19	19	19	20.8	20.8	20.8	108.66	0	64.563	768360000	69	26.6181	26.6269	26.8938	26.8976	26.6674	26.5831
	0.374958	0.122226	Q9Y305	Q9Y305	Acyl-coenzyme A thioesterase 9, mitochondrial	ACOT9	Color2 [DarkGray]	1	4					17	17	17	46.2	46.2	46.2	49.901	0	74.235	936840000	65	27.1481	26.9313	27.1312	26.882	27.1765	26.7854
	0.470628	-0.203903	Q9Y314	Q9Y314	Nitric oxide synthase-interacting protein	NOSIP	Color2 [DarkGray]	1	4					7	7	7	35.5	35.5	35.5	33.172	0	25.122	214740000	25	25.0112	24.6943	24.4533	24.9683	25.0619	24.7402
	0.971607	0.525746	Q9Y315	Q9Y315	Deoxyribose-phosphate aldolase	DERA	Color2 [DarkGray]	1	4					4	4	4	14.8	14.8	14.8	35.23	0	16.766	183960000	15	25.0992	25.1089	24.4925	24.1316	24.6504	24.3414
	0.157365	0.0406628	Q9Y316	Q9Y316	Protein MEMO1	MEMO1	Color2 [DarkGray]	1	4					10	10	10	56.6	56.6	56.6	33.733	0	98.2	814050000	43	26.71	26.9848	26.8319	26.8226	26.8851	26.6971
	1.11464	0.632483	Q9Y376	Q9Y376	Calcium-binding protein 39	CAB39	Color2 [DarkGray]	1	4					4	4	4	11.4	11.4	11.4	39.869	0	13.27	130020000	12	24.6201	24.0604	23.8987	23.5575	23.8273	23.2969
	0.777693	0.0803343	Q9Y383	Q9Y383	Putative RNA-binding protein Luc7-like 2	LUC7L2	Color2 [DarkGray]	1	4					10	10	7	27.6	27.6	17.6	46.513	0	30.738	854430000	56	26.9595	26.9427	26.9751	26.9464	26.9007	26.7892
	0.105296	0.0531089	Q9Y394	Q9Y394	Dehydrogenase/reductase SDR family member 7	DHRS7	Color2 [DarkGray]	1	4					8	8	8	25.4	25.4	25.4	38.298	0	35.371	449910000	27	26.0301	25.9957	25.9951	25.7622	26.3165	25.7829
	1.09472	-0.755159	Q9Y399	Q9Y399	28S ribosomal protein S2, mitochondrial	MRPS2	Color2 [DarkGray]	1	4					6	6	6	18.2	18.2	18.2	33.249	0	10.696	132690000	13	23.2744	23.8128	23.9138	24.6883	24.6689	23.9092
	0.283468	0.0646782	Q9Y3A5	Q9Y3A5	Ribosome maturation protein SBDS	SBDS	Color2 [DarkGray]	1	4					15	15	15	55.6	55.6	55.6	28.763	0	58.286	861930000	51	26.8169	26.9804	27.0357	26.9692	26.7548	26.915
	0.0839839	-0.0465902	Q9Y3A6	Q9Y3A6	Transmembrane emp24 domain-containing protein 5	TMED5	Color2 [DarkGray]	1	4					3	3	3	14.4	14.4	14.4	26.005	0	12.654	239920000	18	25.3483	24.9251	24.7975	25.0619	25.2549	24.8939
	1.01256	-0.394087	Q9Y3B3	Q9Y3B3	Transmembrane emp24 domain-containing protein 7	TMED7	Color2 [DarkGray]	1	4					6	6	6	29.5	29.5	29.5	25.171	0	38.537	761180000	34	26.6555	26.6316	26.2084	26.7951	27.1137	26.769
	0.306896	-0.211767	Q9Y3C6	Q9Y3C6	Peptidyl-prolyl cis-trans isomerase-like 1	PPIL1	Color2 [DarkGray]	1	4					4	4	4	31.3	31.3	31.3	18.237	0	16.181	244240000	22	24.4712	25.1943	24.8629	25.1446	25.3259	24.6932
	0.330234	-0.807402	Q9Y3D0	Q9Y3D0	Mitotic spindle-associated MMXD complex subunit MIP18	FAM96B	Color2 [DarkGray]	1	4					4	4	4	41.7	41.7	41.7	17.663	0	33.486	235740000	12	25.5248	24.5972	22.3293	25.2855	25.3014	24.2867
	0.312056	0.701448	Q9Y3E5	Q9Y3E5	Peptidyl-tRNA hydrolase 2, mitochondrial	PTRH2	Color2 [DarkGray]	1	4					3	3	3	26.8	26.8	26.8	19.193	0	22.386	208800000	12	24.7096	24.6786	24.8925	24.722	22.2488	25.2057
	1.29692	-0.151217	Q9Y3F4	Q9Y3F4	Serine-threonine kinase receptor-associated protein	STRAP	Color2 [DarkGray]	1	4					18	18	18	70.9	70.9	70.9	38.438	0	144.47	3530500000	89	28.8544	28.83	28.8666	28.9642	29.1072	28.9332
	0.012065	-0.00700506	Q9Y3I0	Q9Y3I0	tRNA-splicing ligase RtcB homolog	RTCB	Color2 [DarkGray]	1	4					17	17	17	42	42	42	55.21	0	96.164	1701900000	89	27.5908	27.977	28.0715	27.9175	28.0828	27.66
	1.56657	0.621049	Q9Y3U8	Q9Y3U8	60S ribosomal protein L36	RPL36	Color2 [DarkGray]	1	4					5	5	5	37.1	37.1	37.1	12.254	0	21.314	1732100000	22	27.9839	28.3871	28.4059	27.4028	27.7937	27.7172
	0.361267	0.0548547	Q9Y490	Q9Y490	Talin-1	TLN1	Color2 [DarkGray]	1	4					92	92	82	49.9	49.9	45.3	269.76	0	323.31	14752000000	443	31.1028	30.9618	31.0297	31.0083	31.0402	30.8813
	0.243844	0.341638	Q9Y4E8	Q9Y4E8	Ubiquitin carboxyl-terminal hydrolase 15	USP15	Color2 [DarkGray]	1	4					14	14	13	17.3	17.3	16.4	112.42	0	24.136	185360000	27	24.5577	25.1759	24.5816	24.8515	23.4054	25.0335
	0.228581	0.0729097	Q9Y4L1;Q9BXT5	Q9Y4L1	Hypoxia up-regulated protein 1	HYOU1	Color2 [DarkGray]	1	4					22	22	22	30.8	30.8	30.8	111.33	0	149.39	1588400000	98	27.8681	27.877	27.7537	27.8046	27.9392	27.5362
	0.140407	0.186097	Q9Y4X5	Q9Y4X5	E3 ubiquitin-protein ligase ARIH1	ARIH1	Color2 [DarkGray]	1	4					6	6	6	17.1	17.1	17.1	64.117	0	14.494	106960000	19	24.5111	23.9249	23.076	23.8183	23.1426	23.9927
	0.821197	0.231077	Q9Y520	Q9Y520	Protein PRRC2C	PRRC2C	Color2 [DarkGray]	1	4					11	11	11	5.8	5.8	5.8	316.91	0	29.932	171170000	25	24.7429	24.6884	24.6132	24.4555	24.2318	24.664
	0.0327954	0.0143255	Q9Y570	Q9Y570	Protein phosphatase methylesterase 1	PPME1	Color2 [DarkGray]	1	4					11	11	11	34.7	34.7	34.7	42.315	0	62.95	480850000	39	26.1593	25.9831	26.0898	26.096	26.2843	25.8088
	0.155503	0.0385666	Q9Y5B9	Q9Y5B9	FACT complex subunit SPT16	SUPT16H	Color2 [DarkGray]	1	4					27	27	27	29.5	29.5	29.5	119.91	0	131.66	1414900000	91	27.451	27.7318	27.7181	27.5666	27.5963	27.6223
	1.37381	0.380498	Q9Y5L0	Q9Y5L0	Transportin-3	TNPO3	Color2 [DarkGray]	1	4					10	10	10	13.8	13.8	13.8	104.2	0	34.478	241100000	27	25.3547	25.4367	25.0224	24.8863	24.8481	24.938
	0.378081	0.800619	Q9Y5L4	Q9Y5L4	Mitochondrial import inner membrane translocase subunit Tim13	TIMM13	Color2 [DarkGray]	1	4					3	3	3	36.8	36.8	36.8	10.5	0	11.59	172220000	11	24.8411	24.7616	24.4487	25.0258	24.4731	22.1506
	0.564846	0.279314	Q9Y5M8	Q9Y5M8	Signal recognition particle receptor subunit beta	SRPRB	Color2 [DarkGray]	1	4					13	13	13	56.8	56.8	56.8	29.702	0	43.898	369520000	32	25.5792	25.7389	26.0845	25.2351	25.793	25.5367
	0.765786	0.235912	Q9Y5P4	Q9Y5P4	Collagen type IV alpha-3-binding protein	COL4A3BP	Color2 [DarkGray]	1	4					7	7	7	13	13	13	70.834	0	13.427	88038000	16	23.9515	23.7918	23.6458	23.3399	23.6501	23.6915
	0.708956	0.343836	Q9Y5S2;Q5VT25	Q9Y5S2	Serine/threonine-protein kinase MRCK beta	CDC42BPB	Color2 [DarkGray]	1	4					7	7	7	5.3	5.3	5.3	194.31	0	17.384	89704000	17	23.9621	23.8771	23.3231	23.1883	23.468	23.4745
	0.397933	-0.235881	Q9Y5S9	Q9Y5S9	RNA-binding protein 8A	RBM8A	Color2 [DarkGray]	1	4					6	6	6	39.7	39.7	39.7	19.889	0	22.189	294350000	25	24.8225	25.3708	25.455	25.3857	25.7446	25.2258
	0.478706	1.41005	Q9Y5X3	Q9Y5X3	Sorting nexin-5	SNX5	Color2 [DarkGray]	1	4					13	13	13	37.6	37.6	37.6	46.816	0	42.879	678070000	25	27.2582	26.8947	26.7871	26.7533	26.9266	23.0299
	0.207428	0.155453	Q9Y5Y2	Q9Y5Y2	Cytosolic Fe-S cluster assembly factor NUBP2	NUBP2	Color2 [DarkGray]	1	4					4	4	4	25.8	25.8	25.8	28.825	0	24.497	207470000	14	25.4472	24.6963	24.7782	24.8291	25.1001	24.5261
	0.0639273	-0.0210037	Q9Y678	Q9Y678	Coatomer subunit gamma-1	COPG1	Color2 [DarkGray]	1	4					28	28	26	44.1	44.1	41.2	97.717	0	139.97	2446600000	105	28.4279	28.4799	28.2807	28.3818	28.6009	28.2688
	0.422746	-0.902157	Q9Y696	Q9Y696	Chloride intracellular channel protein 4	CLIC4	Color2 [DarkGray]	1	4					7	7	7	34.4	34.4	34.4	28.772	0	21.013	281420000	22	25.2158	22.8281	25.7184	25.3069	25.3042	25.8578
	0.554662	-0.478625	Q9Y6A4	Q9Y6A4	Cilia- and flagella-associated protein 20	CFAP20	Color2 [DarkGray]	1	4					2	2	2	10.4	10.4	10.4	22.774	0.00038358	5.3895	98808000	10	23.9343	23.9583	22.8356	24.1418	24.1576	23.8646
	2.04612	0.230055	Q9Y6D6	Q9Y6D6	Brefeldin A-inhibited guanine nucleotide-exchange protein 1	ARFGEF1	Color2 [DarkGray]	1	4					9	9	3	7.4	7.4	2.9	208.76	0	31.991	221810000	27	25.0103	25.1643	25.1367	24.8793	24.8876	24.8542
	0.232864	-0.428649	Q9Y6E0;O00506	Q9Y6E0;O00506	Serine/threonine-protein kinase 24;Serine/threonine-protein kinase 24 36 kDa subunit;Serine/threonine-protein kinase 24 12 kDa subunit;Serine/threonine-protein kinase 25	STK24;STK25	Color2 [DarkGray]	1	4					8	8	4	19.9	19.9	12	49.307	0	24.134	184500000	22	24.9146	25.1451	22.8956	24.6452	24.9628	24.6332
	1.0664	-0.301427	Q9Y6E2	Q9Y6E2	Basic leucine zipper and W2 domain-containing protein 2	BZW2	Color2 [DarkGray]	1	4					10	9	9	23.2	21.5	21.5	48.162	0	49.267	274460000	27	24.8831	24.9411	25.2062	25.4185	25.3792	25.1369
	0.447522	0.160323	Q9Y6G9	Q9Y6G9	Cytoplasmic dynein 1 light intermediate chain 1	DYNC1LI1	Color2 [DarkGray]	1	4					9	9	8	20.1	20.1	17.6	56.578	0	21.46	241660000	29	25.3361	24.984	25.1725	24.7737	25.1399	25.098
	0.471867	0.529249	Q9Y6I3;Q9H201	Q9Y6I3	Epsin-1	EPN1	Color2 [DarkGray]	1	4					6	6	6	16.1	16.1	16.1	60.293	0	29.092	226600000	18	24.7409	25.3427	25.2702	25.2607	24.7645	23.7408
	0.00908292	-0.013073	Q9Y6M5	Q9Y6M5	Zinc transporter 1	SLC30A1	Color2 [DarkGray]	1	4					5	5	5	13.4	13.4	13.4	55.299	0	23.339	109190000	13	23.2422	24.0439	24.2138	24.1492	24.2738	23.1162
	0.611197	0.244187	Q9Y6N5	Q9Y6N5	Sulfide:quinone oxidoreductase, mitochondrial	SQRDL	Color2 [DarkGray]	1	4					20	20	20	52.9	52.9	52.9	49.96	0	110.93	2109500000	89	28.5424	28.1369	28.2506	28.1306	28.2558	27.8108
	0.0697248	0.0365543	Q9Y6Y8	Q9Y6Y8	SEC23-interacting protein	SEC23IP	Color2 [DarkGray]	1	4					21	21	21	25.3	25.3	25.3	111.08	0	55.906	664380000	59	26.6862	26.5157	26.5152	26.8811	26.3221	26.4042

## Sheet: sig
Significant	#NAME?	Difference	Protein IDs	Majority protein IDs	Protein names	Gene names
+	3.3906	-1.32465	P62263	P62263	40S ribosomal protein S14	RPS14
+	1.80502	-1.31247	P23921	P23921	Ribonucleoside-diphosphate reductase large subunit	RRM1
+	3.52157	-1.2899	P25398	P25398	40S ribosomal protein S12	RPS12
+	3.27961	-1.25378	P62277	P62277	40S ribosomal protein S13	RPS13
+	1.88488	-1.23287	P63220	P63220	40S ribosomal protein S21	RPS21
+	2.23989	-1.22517	P08708	P08708	40S ribosomal protein S17	RPS17
+	4.15526	-1.2104	P62249	P62249	40S ribosomal protein S16	RPS16
+	2.7622	-1.20356	P62851	P62851	40S ribosomal protein S25	RPS25
+	2.22399	-1.17251	P62847	P62847	40S ribosomal protein S24	RPS24
+	2.8873	-1.15487	P62269	P62269	40S ribosomal protein S18	RPS18
+	4.84402	-1.13712	P46781	P46781	40S ribosomal protein S9	RPS9
+	3.2497	-1.10322	P52272	P52272	Heterogeneous nuclear ribonucleoprotein M	HNRNPM
+	1.79954	-1.09099	P60866	P60866	40S ribosomal protein S20	RPS20
+	2.40807	-1.08644	P39019	P39019	40S ribosomal protein S19	RPS19
+	3.20592	-1.06847	P63244	P63244	Guanine nucleotide-binding protein subunit beta-2-like 1;Guanine nucleotide-binding protein subunit beta-2-like 1, N-terminally processed	GNB2L1
+	4.9093	-1.05185	P23396	P23396	40S ribosomal protein S3	RPS3
+	3.65485	-1.03139	P15880	P15880	40S ribosomal protein S2	RPS2
+	2.21499	-1.02246	P62244	P62244	40S ribosomal protein S15a	RPS15A
+	1.37566	-0.990911	P62273	P62273	40S ribosomal protein S29	RPS29
+	1.96608	-0.989927	P78330	P78330	Phosphoserine phosphatase	PSPH
+	2.14402	-0.983512	P62280	P62280	40S ribosomal protein S11	RPS11
+	3.124	-0.971177	P62701;Q8TD47;P22090	P62701	40S ribosomal protein S4, X isoform	RPS4X
+	1.79852	-0.970408	P62241	P62241	40S ribosomal protein S8	RPS8
+	3.81212	-0.937068	P61247	P61247	40S ribosomal protein S3a	RPS3A
+	2.06509	-0.903478	P46782	P46782	40S ribosomal protein S5;40S ribosomal protein S5, N-terminally processed	RPS5
+	2.56362	-0.902054	O60493	O60493	Sorting nexin-3	SNX3
+	3.87021	-0.898379	O43175	O43175	D-3-phosphoglycerate dehydrogenase	PHGDH
+	1.80168	-0.878712	P62753	P62753	40S ribosomal protein S6	RPS6
+	1.76712	-0.878587	Q12907	Q12907	Vesicular integral-membrane protein VIP36	LMAN2
+	2.67289	-0.866436	O95864	O95864	Fatty acid desaturase 2	FADS2
+	3.00142	-0.851676	P12955	P12955	Xaa-Pro dipeptidase	PEPD
+	1.89896	-0.838417	Q99653	Q99653	Calcineurin B homologous protein 1	CHP1
+	2.50428	-0.827638	P46783;Q9NQ39	P46783;Q9NQ39	40S ribosomal protein S10;Putative 40S ribosomal protein S10-like	RPS10	RPS10P5
+	1.58274	-0.824828	P49247	P49247	Ribose-5-phosphate isomerase	RPIA
+	1.61743	-0.797805	Q9HCC0	Q9HCC0	Methylcrotonoyl-CoA carboxylase beta chain, mitochondrial	MCCC2
+	1.59734	-0.790464	Q9UI30	Q9UI30	Multifunctional methyltransferase subunit TRM112-like protein	TRMT112
+	2.64273	-0.767193	P22570	P22570	NADPH:adrenodoxin oxidoreductase, mitochondrial	FDXR
+	2.38729	-0.765889	P09601	P09601	Heme oxygenase 1	HMOX1
+	1.60469	-0.751387	P62854;Q5JNZ5	P62854;Q5JNZ5	40S ribosomal protein S26;Putative 40S ribosomal protein S26-like 1	RPS26	RPS26P11
+	3.59004	-0.742861	P0DMV9;P0DMV8	P0DMV9;P0DMV8	Heat shock 70 kDa protein 1B;Heat shock 70 kDa protein 1A	HSPA1B	HSPA1A
+	1.52971	-0.732341	Q8WU90	Q8WU90	Zinc finger CCCH domain-containing protein 15	ZC3H15
+	1.51487	-0.729209	Q9HAV7	Q9HAV7	GrpE protein homolog 1, mitochondrial	GRPEL1
+	1.8131	-0.706266	Q0VDF9	Q0VDF9	Heat shock 70 kDa protein 14	HSPA14
+	1.76682	-0.695638	Q99816	Q99816	Tumor susceptibility gene 101 protein	TSG101
+	1.77285	-0.695215	P62857	P62857	40S ribosomal protein S28	RPS28
+	1.9523	-0.693551	Q6FI81	Q6FI81	Anamorsin	CIAPIN1
+	1.56246	-0.690372	P62266	P62266	40S ribosomal protein S23	RPS23
+	2.16207	-0.679487	P08865	P08865	40S ribosomal protein SA	RPSA
+	1.67823	-0.675225	Q9BSH4	Q9BSH4	Translational activator of cytochrome c oxidase 1	TACO1
+	2.58214	-0.665206	O76031	O76031	ATP-dependent Clp protease ATP-binding subunit clpX-like, mitochondrial	CLPX
+	2.09552	-0.661745	P08243	P08243	Asparagine synthetase [glutamine-hydrolyzing]	ASNS
+	2.63495	-0.660726	Q9BYN0	Q9BYN0	Sulfiredoxin-1	SRXN1
+	2.80371	-0.647358	Q9Y2Z0	Q9Y2Z0	Suppressor of G2 allele of SKP1 homolog	SUGT1
+	1.95994	-0.642995	Q9Y5K5	Q9Y5K5	Ubiquitin carboxyl-terminal hydrolase isozyme L5	UCHL5
+	1.90463	-0.640122	P78417	P78417	Glutathione S-transferase omega-1	GSTO1
+	4.63727	-0.607063	O75534	O75534	Cold shock domain-containing protein E1	CSDE1
+	2.26735	-0.596068	P20340;Q9NRW1;Q14964	P20340;Q9NRW1	Ras-related protein Rab-6A;Ras-related protein Rab-6B	RAB6A	RAB6B
+	1.68926	-0.596008	Q14914	Q14914	Prostaglandin reductase 1	PTGR1
+	2.7527	-0.594044	O43765	O43765	Small glutamine-rich tetratricopeptide repeat-containing protein alpha	SGTA
+	1.99622	-0.577623	O75533	O75533	Splicing factor 3B subunit 1	SF3B1
+	2.0921	-0.55677	P11908	P11908	Ribose-phosphate pyrophosphokinase 2	PRPS2
+	2.94987	-0.547137	P52895	P52895	Aldo-keto reductase family 1 member C2	AKR1C2
+	2.57238	-0.543165	P51648	P51648	Fatty aldehyde dehydrogenase	ALDH3A2
+	3.2132	-0.541391	P42677	P42677	40S ribosomal protein S27	RPS27
+	1.84279	-0.540473	P47813	P47813	Eukaryotic translation initiation factor 1A, X-chromosomal	EIF1AX
+	2.23245	-0.536162	P48643	P48643	T-complex protein 1 subunit epsilon	CCT5
+	3.42483	-0.530574	Q9Y617	Q9Y617	Phosphoserine aminotransferase	PSAT1
+	1.89088	-0.526545	P39687;O95626;O43423	P39687	Acidic leucine-rich nuclear phosphoprotein 32 family member A	ANP32A
+	2.67472	-0.501603	P30520	P30520	Adenylosuccinate synthetase isozyme 2	ADSS
+	2.65072	-0.493269	Q92688	Q92688	Acidic leucine-rich nuclear phosphoprotein 32 family member B	ANP32B
+	2.02937	-0.485238	Q13011	Q13011	Delta(3,5)-Delta(2,4)-dienoyl-CoA isomerase, mitochondrial	ECH1
+	2.8509	-0.48514	P50990	P50990	T-complex protein 1 subunit theta	CCT8
+	2.11003	-0.462034	P11940;Q9H361;Q4VXU2;Q96DU9	P11940;Q9H361	Polyadenylate-binding protein 1;Polyadenylate-binding protein 3	PABPC1	PABPC3
+	2.10928	-0.433381	Q7L1Q6	Q7L1Q6	Basic leucine zipper and W2 domain-containing protein 1	BZW1
+	2.77917	-0.429035	P40227;Q92526	P40227	T-complex protein 1 subunit zeta	CCT6A
+	2.27536	-0.419795	P25685	P25685	DnaJ homolog subfamily B member 1	DNAJB1
+	2.22144	-0.406917	P17987	P17987	T-complex protein 1 subunit alpha	TCP1
+	2.25394	-0.394809	Q13442	Q13442	28 kDa heat- and acid-stable phosphoprotein	PDAP1
+	2.31336	-0.381207	Q02818	Q02818	Nucleobindin-1	NUCB1
+	3.37655	-0.355717	P36957	P36957	Dihydrolipoyllysine-residue succinyltransferase component of 2-oxoglutarate dehydrogenase complex, mitochondrial	DLST
+	2.62171	-0.346334	Q99832	Q99832	T-complex protein 1 subunit eta	CCT7
+	3.26545	-0.323137	P08238;Q58FF7	P08238	Heat shock protein HSP 90-beta	HSP90AB1
+	3.68017	-0.278851	P30041	P30041	Peroxiredoxin-6	PRDX6
+	2.78957	0.380793	Q00534	Q00534	Cyclin-dependent kinase 6	CDK6
+	2.3244	0.412457	O75083	O75083	WD repeat-containing protein 1	WDR1
+	2.25764	0.444197	P08754	P08754	Guanine nucleotide-binding protein G(k) subunit alpha	GNAI3
+	2.5022	0.460072	Q14204	Q14204	Cytoplasmic dynein 1 heavy chain 1	DYNC1H1
+	2.16011	0.460523	Q13509	Q13509	Tubulin beta-3 chain	TUBB3
+	1.94496	0.465757	P05556	P05556	Integrin beta-1	ITGB1
+	2.75309	0.476288	Q8TEX9	Q8TEX9	Importin-4	IPO4
+	2.55969	0.47714	Q9UK76	Q9UK76	Hematological and neurological expressed 1 protein;Hematological and neurological expressed 1 protein, N-terminally processed	HN1
+	2.86315	0.487916	P12429	P12429	Annexin A3	ANXA3
+	2.93387	0.491929	P05387	P05387	60S acidic ribosomal protein P2	RPLP2
+	2.83188	0.491942	P13797	P13797	Plastin-3	PLS3
+	2.80983	0.494943	Q01813	Q01813	ATP-dependent 6-phosphofructokinase, platelet type	PFKP
+	2.39093	0.495838	Q99536	Q99536	Synaptic vesicle membrane protein VAT-1 homolog	VAT1
+	2.22387	0.503124	P46108	P46108	Adapter molecule crk	CRK
+	2.73775	0.507137	P36578	P36578	60S ribosomal protein L4	RPL4
+	2.82694	0.525027	Q93052	Q93052	Lipoma-preferred partner	LPP
+	2.07526	0.532405	Q7L5N1	Q7L5N1	COP9 signalosome complex subunit 6	COPS6
+	2.17685	0.536819	P05386	P05386	60S acidic ribosomal protein P1	RPLP1
+	2.66071	0.540874	P42766	P42766	60S ribosomal protein L35	RPL35
+	2.53266	0.552876	P29692	P29692	Elongation factor 1-delta	EEF1D
+	3.56274	0.554781	P39023;Q92901	P39023	60S ribosomal protein L3	RPL3
+	1.88141	0.563007	Q5GLZ8	Q5GLZ8	Probable E3 ubiquitin-protein ligase HERC4	HERC4
+	2.28881	0.568684	Q96KP4	Q96KP4	Cytosolic non-specific dipeptidase	CNDP2
+	1.6883	0.577195	Q9ULC4	Q9ULC4	Malignant T-cell-amplified sequence 1	MCTS1
+	3.11515	0.581727	P18124	P18124	60S ribosomal protein L7	RPL7
+	2.28955	0.582306	Q15404	Q15404	Ras suppressor protein 1	RSU1
+	2.17815	0.583785	Q12979;P11274	Q12979	Active breakpoint cluster region-related protein	ABR
+	2.18971	0.604383	P26373	P26373	60S ribosomal protein L13	RPL13
+	2.63539	0.623017	Q12860	Q12860	Contactin-1	CNTN1
+	2.31926	0.627146	P08670;P17661;P41219;Q16352;P07196;P07197;P12036	P08670	Vimentin	VIM
+	3.27305	0.627176	P05388;Q8NHW5	P05388;Q8NHW5	60S acidic ribosomal protein P0;60S acidic ribosomal protein P0-like	RPLP0	RPLP0P6
+	3.02075	0.628366	P18621	P18621	60S ribosomal protein L17	RPL17
+	2.31093	0.63741	O94826	O94826	Mitochondrial import receptor subunit TOM70	TOMM70A
+	1.92572	0.643615	Q02878	Q02878	60S ribosomal protein L6	RPL6
+	2.20308	0.651927	P46934	P46934	E3 ubiquitin-protein ligase NEDD4	NEDD4
+	1.61178	0.653491	Q96AY3	Q96AY3	Peptidyl-prolyl cis-trans isomerase FKBP10	FKBP10
+	1.93859	0.662598	Q56VL3	Q56VL3	OCIA domain-containing protein 2	OCIAD2
+	2.39747	0.682828	P62888	P62888	60S ribosomal protein L30	RPL30
+	2.18121	0.694097	P30050	P30050	60S ribosomal protein L12	RPL12
+	2.01213	0.702158	P62910	P62910	60S ribosomal protein L32	RPL32
+	1.81053	0.706812	P27635;Q96L21	P27635	60S ribosomal protein L10	RPL10
+	1.60873	0.710649	Q8NBJ7	Q8NBJ7	Sulfatase-modifying factor 2	SUMF2
+	1.75932	0.715532	P61313	P61313	60S ribosomal protein L15	RPL15
+	1.57413	0.732815	A8MXV4	A8MXV4	Nucleoside diphosphate-linked moiety X motif 19, mitochondrial	NUDT19
+	2.93282	0.73641	O75531	O75531	Barrier-to-autointegration factor;Barrier-to-autointegration factor, N-terminally processed	BANF1
+	3.45677	0.745818	P32969	P32969	60S ribosomal protein L9	RPL9
+	3.66997	0.75076	P13667	P13667	Protein disulfide-isomerase A4	PDIA4
+	2.1407	0.764384	Q13867	Q13867	Bleomycin hydrolase	BLMH
+	2.20298	0.769011	P29317;P54764;P54760;P54753	P29317	Ephrin type-A receptor 2	EPHA2
+	3.34971	0.783875	P26006	P26006	Integrin alpha-3;Integrin alpha-3 heavy chain;Integrin alpha-3 light chain	ITGA3
+	1.67327	0.787894	Q9Y3C8	Q9Y3C8	Ubiquitin-fold modifier-conjugating enzyme 1	UFC1
+	2.69997	0.812677	P51149	P51149	Ras-related protein Rab-7a	RAB7A
+	2.20753	0.815348	O95994;Q8TD06	O95994	Anterior gradient protein 2 homolog	AGR2
+	2.81739	0.839209	Q9NUQ9;Q9H0Q0	Q9NUQ9	Protein FAM49B	FAM49B
+	3.90259	0.850344	P26641	P26641	Elongation factor 1-gamma	EEF1G
+	2.42259	0.853919	Q02952	Q02952	A-kinase anchor protein 12	AKAP12
+	2.39204	0.857773	O75340	O75340	Programmed cell death protein 6	PDCD6
+	2.98184	0.940418	P55010	P55010	Eukaryotic translation initiation factor 5	EIF5
+	1.74813	0.988326	P84095;P17081;Q9H4E5	P84095	Rho-related GTP-binding protein RhoG	RHOG
+	1.65393	1.00626	Q9P258	Q9P258	Protein RCC2	RCC2
+	3.52729	1.04153	P13693;Q9HAU6;Q56UQ5	P13693	Translationally-controlled tumor protein	TPT1
+	2.61914	1.07891	P24534	P24534	Elongation factor 1-beta	EEF1B2
+	4.20028	1.09201	O43852	O43852	Calumenin	CALU
+	2.47683	1.68669	P17301	P17301	Integrin alpha-2	ITGA2
+	1.5942	1.94847	O75844	O75844	CAAX prenyl protease 1 homolog	ZMPSTE24
