# Supplementary material for: Cardiac mitochondrial function depends on BUD23 mediated ribosome programming
Source: eLife. 2020 Jan 15;9:e50705. doi: 10.7554/eLife.50705 (PMC7002040; doi:10.7554/eLife.50705)
Supplement: Figure 4—source data 1. — Proteomics was performed on heart tissue from BUD23 deficient mice and littermate control mice (n = 3). Excel workbook tabs: ‘All detected’ are all proteins detected in the analysis; ‘mitochondrial-only’ are proteins which have a mitochondrial subcellular location listed; ‘UpreginKO’ are proteins which were defined as significantly increased in the BUD23-deficient condition (FDR < 0.05); ‘DownregInKO’ are proteins defined as significantly decreased in the BUD-23 deficient condition (FDR < 0.05); ‘ProteomicRuler_SubcellLocation’ shows the calculation of subcellular location for detected proteins; ‘MassCalculations’ shows the final calculation used to produce Figure 4D. [file elife-50705-fig4-data1.xlsx]

## Sheet: All Detected
Significant	-LOG(P-value)	Difference	Protein IDs	Majority protein IDs	Protein names	Gene names	Symbol color	Symbol type	Symbol size	GOCC name	Peptides	Razor + unique peptides	Unique peptides	Sequence coverage [%]	Unique + razor sequence coverage [%]	Unique sequence coverage [%]	Mol. weight [kDa]	Q-value	Score	Intensity	MS/MS count	LFQ intensity CON1	LFQ intensity CON2	LFQ intensity CON3	LFQ intensity KO1	LFQ intensity KO2	LFQ intensity KO3
+	1.26633	2.55234	A3KG59	A3KG59	Peptidase M20 domain-containing protein 2	Pm20d2	Color2 [DarkGray]	1	4	cell part;extracellular membrane-bounded organelle;extracellular organelle;extracellular region part;extracellular vesicular exosome;intracellular organelle part;intracellular part;membrane-bounded organelle;membrane-bounded vesicle;nuclear part;nucleoplasm;organelle;organelle part;vesicle	4	4	4	14.4	14.4	14.4	46.481	0	6.4854	169850000	7	25.1724	25.4182	25.7306	22.2688	21.6754	24.7199
+	1.7008	2.22938	A3KMP2	A3KMP2	Tetratricopeptide repeat protein 38	Ttc38	Color2 [DarkGray]	1	4	extracellular membrane-bounded organelle;extracellular organelle;extracellular region part;extracellular vesicular exosome;membrane-bounded organelle;membrane-bounded vesicle;organelle;vesicle	3	3	3	9.7	9.7	9.7	52.223	0	10.71	132710000	5	25.3345	24.9207	25.569	22.103	22.9821	24.0508
+	1.55812	1.55862	A6H611	A6H611	Mitochondrial intermediate peptidase	Mipep	Color2 [DarkGray]	1	4	cell part;cytoplasmic part;intracellular membrane-bounded organelle;intracellular organelle;intracellular organelle lumen;intracellular organelle part;intracellular part;membrane-bounded organelle;membrane-enclosed lumen;mitochondrial matrix;mitochondrial part;mitochondrion;organelle;organelle lumen;organelle part	5	5	5	9	9	9	80.851	0	6.9987	103330000	6	24.25	24.7243	24.6248	22.4685	23.8451	22.6096
+	1.33539	-0.665189	B1AXP6	B1AXP6	Mitochondrial import receptor subunit TOM5 homolog	Tomm5	Color2 [DarkGray]	1	4	cell part;cytoplasmic part;integral to membrane;intracellular membrane-bounded organelle;intracellular organelle;intracellular organelle part;intracellular part;intrinsic to membrane;macromolecular complex;membrane part;membrane-bounded organelle;mitochondrial membrane part;mitochondrial outer membrane translocase complex;mitochondrial part;mitochondrion;organelle;organelle part;protein complex	5	5	5	62.7	62.7	62.7	6.0372	0	7.7314	357940000	17	25.5307	25.6452	25.0118	26.0993	25.8231	26.2608
+	1.7259	-0.691228	D3YYU8	D3YYU8	Obscurin-like protein 1	Obsl1	Color2 [DarkGray]	1	4	cell part;centrosome;cytoplasm;cytoplasmic part;cytoskeletal part;Golgi apparatus;intracellular membrane-bounded organelle;intracellular non-membrane-bounded organelle;intracellular organelle;intracellular organelle part;intracellular part;membrane-bounded organelle;microtubule organizing center;non-membrane-bounded organelle;organelle;organelle part;perinuclear region of cytoplasm	25	25	25	20.6	20.6	20.6	197.93	0	64.346	655640000	62	26.49	25.9455	26.2352	27.039	26.9644	26.7408
+	4.03488	1.01722	E9Q401;A2AGL3;E9PZQ0	E9Q401	Ryanodine receptor 2	Ryr2	Color2 [DarkGray]	1	4	calcium channel complex;cation channel complex;cell cortex;cell part;contractile fiber part;cytoplasm;cytoplasmic part;endoplasmic reticulum;endoplasmic reticulum membrane;endoplasmic reticulum part;extracellular membrane-bounded organelle;extracellular organelle;extracellular region part;extracellular vesicular exosome;I band;integral to membrane;intracellular membrane-bounded organelle;intracel…	166	166	166	43.6	43.6	43.6	564.81	0	323.31	24738000000	1002	32.3001	32.3801	32.5145	31.4078	31.3748	31.3605
+	1.45169	0.744715	E9Q4Z2	E9Q4Z2	Acetyl-CoA carboxylase 2;Biotin carboxylase	Acacb	Color2 [DarkGray]	1	4	cell part;cytoplasmic part;endomembrane system;intracellular membrane-bounded organelle;intracellular organelle;intracellular part;membrane;membrane-bounded organelle;mitochondrion;nucleus;organelle	20	14	14	11	7.6	7.6	275.75	0	20.311	318660000	25	26.4185	25.8167	25.6718	25.3576	25.1435	25.1717
+	1.61975	0.677311	O08532;Q6PHS9	O08532	Voltage-dependent calcium channel subunit alpha-2/delta-1;Voltage-dependent calcium channel subunit alpha-2-1;Voltage-dependent calcium channel subunit delta-1	Cacna2d1	Color2 [DarkGray]	1	4	calcium channel complex;cation channel complex;cell part;cytoplasmic part;endoplasmic reticulum;extracellular membrane-bounded organelle;extracellular organelle;extracellular region part;extracellular vesicular exosome;intracellular membrane-bounded organelle;intracellular organelle;intracellular part;ion channel complex;macromolecular complex;membrane part;membrane-bounded organelle;membrane-bou…	18	18	18	19.1	19.1	19.1	124.63	0	27.662	534580000	49	26.8443	26.4779	26.9494	26.0076	26.3272	25.9049
+	1.89961	0.862366	O08600	O08600	Endonuclease G, mitochondrial	Endog	Color2 [DarkGray]	1	4	cell part;cytoplasmic part;intracellular membrane-bounded organelle;intracellular organelle;intracellular part;membrane-bounded organelle;mitochondrion;organelle	9	9	9	43.5	43.5	43.5	32.19	0	40.457	623770000	37	26.833	27.1439	27.1428	25.8356	26.3233	26.3737
+	2.04969	0.553529	O08709	O08709	Peroxiredoxin-6	Prdx6	Color2 [DarkGray]	1	4	cell part;cytoplasm;cytoplasmic membrane-bounded vesicle;cytoplasmic part;cytoplasmic vesicle;cytosol;extracellular membrane-bounded organelle;extracellular organelle;extracellular region part;extracellular space;extracellular vesicular exosome;intracellular membrane-bounded organelle;intracellular organelle;intracellular part;lysosome;lytic vacuole;membrane;membrane-bounded organelle;membrane-bo…	13	13	13	70.5	70.5	70.5	24.87	0	215.13	5589600000	128	30.0648	30.0917	30.0145	29.3767	29.7312	29.4025
+	1.53533	0.514191	O08715	O08715	A-kinase anchor protein 1, mitochondrial	Akap1	Color2 [DarkGray]	1	4	cell part;cytoplasmic part;endoplasmic reticulum;integral to membrane;intracellular membrane-bounded organelle;intracellular organelle;intracellular organelle part;intracellular part;intrinsic to membrane;membrane;membrane part;membrane-bounded organelle;mitochondrial membrane;mitochondrial outer membrane;mitochondrial part;mitochondrion;organelle;organelle membrane;organelle outer membrane;organ…	8	8	8	18.7	18.7	18.7	92.194	0	16.404	223530000	29	25.1589	25.6222	25.318	24.7115	24.9589	24.8861
+	1.54729	-0.519001	O09131;Q8K2Q2	O09131	Glutathione S-transferase omega-1	Gsto1	Color2 [DarkGray]	1	4	cell part;cytoplasm;cytoplasmic part;cytosol;extracellular membrane-bounded organelle;extracellular organelle;extracellular region part;extracellular vesicular exosome;intracellular part;membrane-bounded organelle;membrane-bounded vesicle;organelle;vesicle	15	15	15	60.8	60.8	60.8	27.497	0	104.32	2508700000	112	28.0503	28.4987	28.2752	28.9609	28.7313	28.689
+	2.0574	0.891471	O09161	O09161	Calsequestrin-2	Casq2	Color2 [DarkGray]	1	4	cell part;contractile fiber part;cytoplasm;cytoplasmic part;endoplasmic reticulum;endoplasmic reticulum lumen;endoplasmic reticulum part;intracellular;intracellular membrane-bounded organelle;intracellular organelle;intracellular organelle lumen;intracellular organelle part;intracellular part;junctional membrane complex;macromolecular complex;membrane-bounded organelle;membrane-enclosed lumen;org…	15	15	15	41.7	41.7	41.7	48.176	0	227.62	25648000000	229	32.3312	32.1767	32.4718	31.5744	31.1049	31.6261
+	1.91842	-1.70807	O09172	O09172	Glutamate--cysteine ligase regulatory subunit	Gclm	Color2 [DarkGray]	1	4	cell part;cytoplasmic part;glutamate-cysteine ligase complex;intracellular part;macromolecular complex;protein complex	3	3	3	15	15	15	30.534	0	7.3356	80289000	7	22.6275	21.367	22.3759	23.8958	23.9108	23.688
+	4.74111	1.03494	O09174	O09174	Alpha-methylacyl-CoA racemase	Amacr	Color2 [DarkGray]	1	4	cell part;cytoplasm;cytoplasmic part;intracellular membrane-bounded organelle;intracellular organelle;intracellular part;membrane-bounded organelle;microbody;mitochondrion;organelle;peroxisome	5	5	5	17.1	17.1	17.1	41.704	0	10.223	169530000	17	25.2007	25.2385	25.221	24.1405	24.1461	24.2689
+	1.29691	0.643687	O35215	O35215	D-dopachrome decarboxylase	Ddt	Color2 [DarkGray]	1	4	cell part;cytoplasm;extracellular membrane-bounded organelle;extracellular organelle;extracellular region part;extracellular vesicular exosome;intracellular part;membrane-bounded organelle;membrane-bounded vesicle;organelle;vesicle	8	8	8	65.3	65.3	65.3	13.077	0	34.645	821190000	42	27.5949	26.9738	27.3583	26.9184	26.6652	26.4123
+	1.64307	-0.650859	O35326	O35326	Serine/arginine-rich splicing factor 5	Srsf5	Color2 [DarkGray]	1	4	cell part;cytoplasm;intracellular non-membrane-bounded organelle;intracellular organelle;intracellular organelle part;intracellular part;non-membrane-bounded organelle;nuclear body;nuclear part;nuclear speck;nucleolus;nucleoplasm part;organelle;organelle part	3	3	2	10.4	10.4	7.1	30.891	0	6.2049	250950000	15	25.0818	24.7711	24.7962	25.8112	25.498	25.2924
+	0.963362	1.58649	O35350	O35350	Calpain-1 catalytic subunit	Capn1	Color2 [DarkGray]	1	4	adherens junction;anchoring junction;cell junction;cell part;cell-substrate adherens junction;cell-substrate junction;cytoplasm;cytoplasmic part;cytosol;extracellular membrane-bounded organelle;extracellular organelle;extracellular region part;extracellular vesicular exosome;focal adhesion;intracellular membrane-bounded organelle;intracellular organelle;intracellular part;lysosome;lytic vacuole;m…	8	8	8	12.3	12.3	12.3	82.105	0	14.25	186780000	9	25.5427	25.2442	25.5517	24.4892	22.3381	24.7518
+	1.89024	0.853693	O35435	O35435	Dihydroorotate dehydrogenase (quinone), mitochondrial	Dhodh	Color2 [DarkGray]	1	4	cell body;cell part;cytoplasmic part;integral to membrane;intracellular membrane-bounded organelle;intracellular organelle;intracellular organelle part;intracellular part;intrinsic to membrane;intrinsic to mitochondrial inner membrane;intrinsic to organelle membrane;membrane part;membrane-bounded organelle;mitochondrial membrane part;mitochondrial part;mitochondrion;neuronal cell body;nuclear par…	7	7	7	27.1	27.1	27.1	42.699	0	19.405	210420000	18	25.4509	25.3731	25.4024	24.8771	24.1936	24.5946
+	5.09401	0.706823	O35459	O35459	Delta(3,5)-Delta(2,4)-dienoyl-CoA isomerase, mitochondrial	Ech1	Color2 [DarkGray]	1	4	cell part;cytoplasmic part;extracellular membrane-bounded organelle;extracellular organelle;extracellular region part;extracellular vesicular exosome;intracellular membrane-bounded organelle;intracellular organelle;intracellular part;membrane;membrane-bounded organelle;membrane-bounded vesicle;microbody;mitochondrion;organelle;peroxisome;vesicle	14	14	14	49.5	49.5	49.5	36.118	0	224.72	6238300000	179	30.2944	30.2752	30.2839	29.5317	29.5925	29.6088
+	2.01982	-0.66984	O35593	O35593	26S proteasome non-ATPase regulatory subunit 14	Psmd14	Color2 [DarkGray]	1	4	cell part;extracellular membrane-bounded organelle;extracellular organelle;extracellular region part;extracellular vesicular exosome;intracellular membrane-bounded organelle;intracellular organelle;intracellular part;macromolecular complex;membrane-bounded organelle;membrane-bounded vesicle;nucleus;organelle;proteasome accessory complex;proteasome complex;proteasome regulatory particle, lid subco…	5	5	5	16.1	16.1	16.1	34.577	0	15.523	485590000	31	25.5914	25.9102	26.0385	26.5012	26.6174	26.4309
+	1.57926	-0.878193	O35639	O35639	Annexin A3	Anxa3	Color2 [DarkGray]	1	4	cell part;cytoplasm;cytoplasmic membrane-bounded vesicle;cytoplasmic part;cytoplasmic vesicle;cytoplasmic vesicle membrane;cytoplasmic vesicle part;endocytic vesicle membrane;extracellular membrane-bounded organelle;extracellular organelle;extracellular region part;extracellular vesicular exosome;intracellular membrane-bounded organelle;intracellular organelle;intracellular organelle part;intrace…	15	15	15	54.5	54.5	54.5	36.384	0	72.53	1552700000	61	27.4011	27.205	27.4541	28.4058	28.5392	27.7498
+	2.5626	0.375804	O35678	O35678	Monoglyceride lipase	Mgll	Color2 [DarkGray]	1	4	axon;axon part;cell part;cell projection;cell projection part;cytoplasmic part;cytosol;extrinsic to membrane;intracellular organelle part;intracellular part;membrane part;neuron projection;nuclear part;nucleoplasm;organelle part;synapse;varicosity	14	14	14	61.4	61.4	61.4	33.387	0	81.676	1188300000	59	27.682	27.7406	27.7475	27.4524	27.3094	27.2809
+	2.10411	-1.28155	O35685	O35685	Nuclear migration protein nudC	Nudc	Color2 [DarkGray]	1	4	cell part;cytoplasm;cytoskeletal part;intracellular membrane-bounded organelle;intracellular organelle;intracellular organelle part;intracellular part;macromolecular complex;membrane-bounded organelle;microtubule;nucleus;organelle;organelle part;protein complex	5	5	5	17.5	17.5	17.5	38.358	0	19.564	370300000	15	25.2982	25.1712	24.6367	26.0317	26.3238	26.5952
+	2.12823	0.943537	O35855	O35855	Branched-chain-amino-acid aminotransferase, mitochondrial	Bcat2	Color2 [DarkGray]	1	4	cell part;cytoplasmic part;intracellular membrane-bounded organelle;intracellular organelle;intracellular part;membrane-bounded organelle;mitochondrion;organelle	14	14	14	45	45	45	44.127	0	119.21	2991100000	101	29.4504	28.9404	29.5118	28.4362	28.2597	28.3762
+	2.67701	0.776697	O35857	O35857	Mitochondrial import inner membrane translocase subunit TIM44	Timm44	Color2 [DarkGray]	1	4	cell part;cytoplasmic part;intracellular membrane-bounded organelle;intracellular organelle;intracellular organelle lumen;intracellular organelle part;intracellular part;membrane;membrane-bounded organelle;membrane-enclosed lumen;mitochondrial inner membrane;mitochondrial matrix;mitochondrial membrane;mitochondrial part;mitochondrion;organelle;organelle inner membrane;organelle lumen;organelle me…	16	16	16	39.8	39.8	39.8	51.091	0	115.6	2075600000	82	28.6716	28.6487	28.8619	27.7778	28.0394	28.035
+	1.50426	-0.571421	O35887	O35887	Calumenin	Calu	Color2 [DarkGray]	1	4	cell part;cytoplasmic membrane-bounded vesicle;cytoplasmic part;cytoplasmic vesicle;endoplasmic reticulum;endoplasmic reticulum lumen;endoplasmic reticulum part;extracellular region;intracellular membrane-bounded organelle;intracellular organelle;intracellular organelle lumen;intracellular organelle part;intracellular part;melanosome;membrane;membrane-bounded organelle;membrane-bounded vesicle;me…	12	12	12	49.5	49.5	49.5	37.063	0	98.609	1634900000	69	27.6094	27.4908	27.8228	27.9504	28.4566	28.2302
+	2.98842	-1.87358	O54931	O54931	A-kinase anchor protein 2	Akap2	Color2 [DarkGray]	1	4		19	19	19	24.9	24.9	24.9	98.577	0	90.992	1454900000	61	26.6252	26.6381	26.2556	28.3081	28.7207	28.1108
+	1.9645	0.544454	O54950	O54950	5-AMP-activated protein kinase subunit gamma-1	Prkag1	Color2 [DarkGray]	1	4	AMP-activated protein kinase complex;cell part;cytoplasmic part;cytosol;extracellular membrane-bounded organelle;extracellular organelle;extracellular region part;extracellular vesicular exosome;intracellular membrane-bounded organelle;intracellular organelle;intracellular organelle part;intracellular part;macromolecular complex;membrane;membrane-bounded organelle;membrane-bounded vesicle;nuclear…	6	6	5	24.2	24.2	21.2	37.52	0	19.768	399930000	19	26.3109	26.0986	26.2722	25.7639	25.8044	25.4802
+	1.97922	-1.13881	O54962	O54962	Barrier-to-autointegration factor;Barrier-to-autointegration factor, N-terminally processed	Banf1	Color2 [DarkGray]	1	4	cell part;chromosome;cytoplasm;extracellular membrane-bounded organelle;extracellular organelle;extracellular region part;extracellular vesicular exosome;intracellular membrane-bounded organelle;intracellular non-membrane-bounded organelle;intracellular organelle;intracellular organelle part;intracellular part;membrane-bounded organelle;membrane-bounded vesicle;non-membrane-bounded organelle;nucl…	4	4	4	44.9	44.9	44.9	10.102	0	34.068	779350000	18	26.2511	25.7635	26.6053	27.4305	27.371	27.2348
+	1.63098	-0.644309	O55023	O55023	Inositol monophosphatase 1	Impa1	Color2 [DarkGray]	1	4	cell part;cytoplasm;extracellular membrane-bounded organelle;extracellular organelle;extracellular region part;extracellular vesicular exosome;intracellular part;membrane-bounded organelle;membrane-bounded vesicle;organelle;vesicle	6	6	6	25.6	25.6	25.6	30.436	0	16.021	324050000	16	25.4827	25.2971	25.1083	25.6659	25.9987	26.1565
+	1.67099	2.31523	O55028	O55028	[3-methyl-2-oxobutanoate dehydrogenase [lipoamide]] kinase, mitochondrial	Bckdk	Color2 [DarkGray]	1	4	cell part;cytoplasmic part;dihydrolipoyl dehydrogenase complex;intracellular membrane-bounded organelle;intracellular organelle;intracellular organelle part;intracellular part;macromolecular complex;membrane-bounded organelle;mitochondrial alpha-ketoglutarate dehydrogenase complex;mitochondrial part;mitochondrial tricarboxylic acid cycle enzyme complex;mitochondrion;organelle;organelle part;prote…	4	4	4	18.4	18.4	18.4	46.587	0	15.027	126550000	13	25.2804	25.1319	24.8616	22.4625	21.8971	23.9688
+	1.92529	-0.4307	O55029	O55029	Coatomer subunit beta	Copb2	Color2 [DarkGray]	1	4	cell part;COPI vesicle coat;cytoplasmic part;cytoplasmic vesicle part;cytosol;Golgi apparatus;Golgi apparatus part;intracellular membrane-bounded organelle;intracellular organelle;intracellular organelle part;intracellular part;macromolecular complex;membrane coat;membrane part;membrane-bounded organelle;organelle;organelle part;protein complex;vesicle coat	15	15	15	24	24	24	102.45	0	41.807	678160000	52	26.5381	26.2714	26.5777	26.8566	26.8953	26.9275
+	3.71019	0.855075	O55126	O55126	Protein NipSnap homolog 2	Gbas	Color2 [DarkGray]	1	4	cell part;cytoplasmic part;intracellular membrane-bounded organelle;intracellular organelle;intracellular part;membrane-bounded organelle;mitochondrion;organelle	17	17	17	58.4	58.4	58.4	32.932	0	282.27	14774000000	167	31.4857	31.5567	31.6564	30.6285	30.7365	30.7686
+	1.75507	-0.528628	O55131;Q9DA97	O55131	Septin-7	2007-09-01	Color2 [DarkGray]	1	4	actin cytoskeleton;actin filament bundle;actomyosin;axon part;axon terminus;axoneme;cell cortex;cell cortex part;cell division site part;cell part;cell projection part;chromosomal part;cleavage furrow;condensed chromosome kinetochore;cytoplasm;cytoplasmic part;cytoskeletal part;cytoskeleton;extracellular membrane-bounded organelle;extracellular organelle;extracellular region part;extracellular ve…	9	9	8	27.3	27.3	25.2	50.549	0	60.109	1238700000	50	27.0168	27.0429	27.3197	27.8448	27.5542	27.5663
+	1.95862	-2.73578	O55135	O55135	Eukaryotic translation initiation factor 6	Eif6	Color2 [DarkGray]	1	4	cell part;cytoplasm;cytoskeletal part;extracellular membrane-bounded organelle;extracellular organelle;extracellular region part;extracellular vesicular exosome;intermediate filament;intracellular membrane-bounded organelle;intracellular non-membrane-bounded organelle;intracellular organelle;intracellular organelle part;intracellular part;lamin filament;macromolecular complex;membrane-bounded org…	7	7	7	44.1	44.1	44.1	26.511	0	41.565	338630000	21	24.6738	23.6867	22.6572	26.4824	26.6849	26.0578
+	3.19593	0.539335	O55143;Q8R429;Q64518	O55143	Sarcoplasmic/endoplasmic reticulum calcium ATPase 2	Atp2a2	Color2 [DarkGray]	1	4	cell junction;cell part;cell-cell contact zone;cell-cell junction;contractile fiber part;cytoplasmic part;endoplasmic reticulum;endoplasmic reticulum membrane;endoplasmic reticulum part;endoplasmic reticulum-Golgi intermediate compartment;H zone;I band;integral to membrane;intercalated disc;intracellular membrane-bounded organelle;intracellular organelle;intracellular organelle part;intracellular…	64	64	64	54.9	54.9	54.9	114.86	0	323.31	262120000000	1762	35.4877	35.537	35.5961	34.9649	34.9456	35.0924
+	1.75667	2.26092	O55186	O55186	CD59A glycoprotein	Cd59a	Color2 [DarkGray]	1	4	anchored to membrane;cell part;external side of plasma membrane;extracellular region;intrinsic to membrane;membrane part;plasma membrane part	2	2	2	21.1	21.1	21.1	13.648	0	16.422	120530000	13	24.7903	24.6742	25.1255	21.677	22.5084	23.6219
+	3.25405	-0.851152	O55234	O55234	Proteasome subunit beta type-5	Psmb5	Color2 [DarkGray]	1	4	cell part;centrosome;cytoplasm;cytoplasmic part;cytoskeletal part;cytosol;extracellular membrane-bounded organelle;extracellular organelle;extracellular region part;extracellular vesicular exosome;intracellular membrane-bounded organelle;intracellular non-membrane-bounded organelle;intracellular organelle;intracellular organelle part;intracellular part;macromolecular complex;membrane-bounded orga…	10	10	10	37.5	37.5	37.5	28.532	0	44.343	1296300000	42	27.2154	27.1488	27.0417	28.0359	28.0718	27.8516
+	1.58807	-0.744823	O70152	O70152	Dolichol-phosphate mannosyltransferase subunit 1	Dpm1	Color2 [DarkGray]	1	4	cell part;cytoplasmic part;endoplasmic reticulum membrane;endoplasmic reticulum part;intracellular organelle part;intracellular part;membrane;membrane part;organelle membrane;organelle part	2	2	2	10	10	10	29.174	0	3.5632	43569000	4	22.4877	22.5253	22.5467	23.0145	23.6918	23.0879
+	2.61431	-0.636254	O70194	O70194	Eukaryotic translation initiation factor 3 subunit D	Eif3d	Color2 [DarkGray]	1	4	cell part;cytoplasmic part;eukaryotic 43S preinitiation complex;eukaryotic 48S preinitiation complex;eukaryotic translation initiation factor 3 complex;eukaryotic translation initiation factor 3 complex, eIF3m;intracellular part;macromolecular complex;membrane;protein complex;ribonucleoprotein complex;translation preinitiation complex	10	10	10	22.1	22.1	22.1	63.988	0	46.903	869330000	41	26.6418	26.6039	26.8883	27.2967	27.393	27.353
+	3.10946	-1.19669	O70251	O70251	Elongation factor 1-beta	Eef1b	Color2 [DarkGray]	1	4	cell part;cytoplasm;cytoplasmic part;eukaryotic translation elongation factor 1 complex;intracellular part;macromolecular complex;protein complex	8	8	8	52.4	52.4	52.4	24.693	0	166.28	4481600000	68	28.6083	28.5455	28.9148	29.9362	29.9607	29.7617
+	3.39093	-1.27905	O70373	O70373	Xin actin-binding repeat-containing protein 1	Xirp1	Color2 [DarkGray]	1	4	adherens junction;anchoring junction;cell junction;cell-cell adherens junction;cell-cell contact zone;cell-cell junction;fascia adherens;intercalated disc	40	40	40	57.2	57.2	57.2	123.43	0	259.32	3350800000	132	28.2407	28.3138	27.9931	29.5152	29.5403	29.3293
+	1.81329	-0.600491	O70400	O70400	PDZ and LIM domain protein 1	Pdlim1	Color2 [DarkGray]	1	4	adherens junction;anchoring junction;cell junction;cell part;cell-substrate adherens junction;cell-substrate junction;cytoplasm;cytoskeleton;focal adhesion;intracellular non-membrane-bounded organelle;intracellular organelle;intracellular organelle part;intracellular part;macromolecular complex;non-membrane-bounded organelle;nuclear part;nucleoplasm part;organelle;organelle part;protein complex;t…	16	16	16	75.8	75.8	75.8	35.774	0	167.22	1821700000	79	27.5283	27.9716	27.8945	28.3215	28.5089	28.3655
+	1.4595	0.544354	O70433	O70433	Four and a half LIM domains protein 2	Fhl2	Color2 [DarkGray]	1	4	actin cytoskeleton;adherens junction;anchoring junction;cell junction;cell part;cell-substrate adherens junction;cell-substrate junction;contractile fiber part;cytoplasmic part;cytoskeleton;focal adhesion;intracellular membrane-bounded organelle;intracellular non-membrane-bounded organelle;intracellular organelle;intracellular organelle part;intracellular part;M band;membrane-bounded organelle;no…	24	24	24	81.4	81.4	81.4	32.072	0	323.31	16579000000	278	31.5627	31.8364	31.383	31.22	31.0911	30.8379
+	2.29284	-0.661147	O70435	O70435	Proteasome subunit alpha type-3	Psma3	Color2 [DarkGray]	1	4	cell part;cytoplasm;cytoplasmic part;cytosol;extracellular membrane-bounded organelle;extracellular organelle;extracellular region part;extracellular vesicular exosome;intracellular membrane-bounded organelle;intracellular organelle;intracellular part;macromolecular complex;membrane-bounded organelle;membrane-bounded vesicle;nucleus;organelle;proteasome complex;proteasome core complex;proteasome …	9	9	9	36.1	36.1	36.1	28.405	0	21.379	958510000	44	27.0291	26.8093	26.6506	27.5072	27.5599	27.4054
+	2.70511	0.392131	O70468;Q5XKE0	O70468	Myosin-binding protein C, cardiac-type	Mybpc3	Color2 [DarkGray]	1	4	A band;cell part;contractile fiber;contractile fiber part;cytoplasmic part;cytoskeletal part;cytoskeleton;intracellular non-membrane-bounded organelle;intracellular organelle;intracellular organelle part;intracellular part;macromolecular complex;muscle myosin complex;myofibril;myosin complex;myosin filament;myosin II complex;non-membrane-bounded organelle;organelle;organelle part;protein complex;…	96	96	96	69.4	69.4	69.4	140.63	0	323.31	170020000000	1612	34.8065	34.9132	34.9276	34.5053	34.4168	34.5487
+	1.02444	-1.01554	O70493	O70493	Sorting nexin-12	Snx12	Color2 [DarkGray]	1	4	cell part;cytoplasmic part;early endosome;endosome;extracellular membrane-bounded organelle;extracellular organelle;extracellular region part;extracellular vesicular exosome;extrinsic to membrane;intracellular membrane-bounded organelle;intracellular organelle;intracellular part;membrane part;membrane-bounded organelle;membrane-bounded vesicle;organelle;vesicle	4	3	3	19.4	15.2	15.2	19.116	0.0036075	1.9855	68174000	5	23.4116	22.0408	22.5905	23.5054	24.1749	23.4093
+	2.81037	1.17883	O70548	O70548	Telethonin	Tcap	Color2 [DarkGray]	1	4	cell part;contractile fiber part;cytoplasmic part;I band;intracellular part;organelle part;Z disc	6	6	6	41.3	41.3	41.3	19.077	0	27.35	411900000	31	26.471	26.3916	26.7788	25.2092	25.3483	25.5474
+	3.04439	1.69542	O70622	O70622	Reticulon-2	Rtn2	Color2 [DarkGray]	1	4	cell part;cytoplasmic part;endoplasmic reticulum;endoplasmic reticulum membrane;endoplasmic reticulum part;integral to membrane;intracellular membrane-bounded organelle;intracellular organelle;intracellular organelle part;intracellular part;intrinsic to membrane;membrane;membrane part;membrane-bounded organelle;organelle;organelle membrane;organelle part;organelle subcompartment;plasma membrane p…	4	4	4	13.2	13.2	13.2	51.346	0	46.006	775050000	27	27.2959	27.6723	27.8527	25.713	26.0074	26.0141
+	1.66985	-1.13487	O88447	O88447	Kinesin light chain 1	Klc1	Color2 [DarkGray]	1	4	axon;cell part;cell projection;cell projection part;ciliary rootlet;cilium part;cytoplasm;cytoplasmic membrane-bounded vesicle;cytoplasmic part;cytoplasmic vesicle;cytoskeletal part;cytosol;growth cone;intracellular membrane-bounded organelle;intracellular organelle;intracellular organelle part;intracellular part;kinesin complex;macromolecular complex;membrane;membrane-bounded organelle;membrane-…	9	9	7	20.1	20.1	15	61.449	0	22.896	216650000	15	24.2956	24.3828	24.1933	25.4031	25.9634	24.9099
+	1.40792	-0.734325	O88448	O88448	Kinesin light chain 2	Klc2	Color2 [DarkGray]	1	4	cell part;cell projection;cell projection part;ciliary rootlet;cilium part;cytoplasm;cytoplasmic part;cytoskeletal part;cytosol;intracellular organelle part;intracellular part;kinesin complex;macromolecular complex;membrane;microtubule;microtubule associated complex;neuron projection;organelle part;protein complex	3	2	1	5.5	3.2	1.7	66.662	0	3.9865	88546000	5	23.471	23.4872	23.3264	24.2116	24.5472	23.7287
+	2.28926	-0.917114	O88487	O88487	Cytoplasmic dynein 1 intermediate chain 2	Dync1i2	Color2 [DarkGray]	1	4	cell part;cytoplasmic dynein complex;cytoplasmic part;cytoskeletal part;dynein complex;intracellular organelle part;intracellular part;macromolecular complex;microtubule;microtubule associated complex;organelle;organelle part;protein complex;vesicle	5	5	5	14.4	14.4	14.4	68.393	0	36.906	363700000	13	25.3929	25.3439	24.9981	26.319	26.214	25.9533
+	2.48889	-0.490217	O88685	O88685	26S protease regulatory subunit 6A	Psmc3	Color2 [DarkGray]	1	4	cell part;cytoplasmic mRNA processing body;cytoplasmic part;cytosolic part;cytosolic proteasome complex;intracellular membrane-bounded organelle;intracellular non-membrane-bounded organelle;intracellular organelle;intracellular organelle part;intracellular part;macromolecular complex;membrane;membrane-bounded organelle;non-membrane-bounded organelle;nuclear part;nuclear proteasome complex;nucleus…	15	15	15	47.1	47.1	47.1	49.548	0	84.176	1894100000	74	27.8256	27.8966	28.0425	28.489	28.4114	28.3349
+	2.03146	0.662142	O88712	O88712	C-terminal-binding protein 1	Ctbp1	Color2 [DarkGray]	1	4	cell part;cytoplasmic part;cytosol;intracellular membrane-bounded organelle;intracellular organelle;intracellular organelle part;intracellular part;macromolecular complex;membrane-bounded organelle;nuclear part;nucleoplasm;nucleoplasm part;nucleus;organelle;organelle part;protein complex;transcription factor complex;transcriptional repressor complex	6	6	4	18.1	18.1	13.8	47.744	0	12.815	271260000	28	25.8033	25.6982	25.6877	24.8156	25.2819	25.1053
+	2.69497	0.924974	O88844	O88844	Isocitrate dehydrogenase [NADP] cytoplasmic	Idh1	Color2 [DarkGray]	1	4	cell part;cytoplasm;cytoplasmic part;cytosol;extracellular membrane-bounded organelle;extracellular organelle;extracellular region part;extracellular vesicular exosome;intracellular membrane-bounded organelle;intracellular organelle;intracellular part;membrane-bounded organelle;membrane-bounded vesicle;microbody;mitochondrion;organelle;peroxisome;vesicle	20	19	19	54.8	52.7	52.7	46.674	0	88.423	1769200000	94	28.6971	28.3865	28.4152	27.4086	27.656	27.6593
+	2.5211	-0.574753	O88983	O88983	Syntaxin-8	Stx8	Color2 [DarkGray]	1	4	cell part;cytoplasmic part;early endosome;endosomal part;endosome;endosome membrane;Golgi apparatus part;integral to membrane;intracellular membrane-bounded organelle;intracellular organelle;intracellular organelle part;intracellular part;intrinsic to membrane;late endosome;late endosome membrane;lysosomal membrane;macromolecular complex;membrane;membrane part;membrane-bounded organelle;organelle…	3	3	3	11.4	11.4	11.4	26.925	0.00038655	2.6038	43796000	10	22.446	22.4822	22.3741	22.8524	23.036	23.1381
+	1.90937	-0.437642	O89079	O89079	Coatomer subunit epsilon	Cope	Color2 [DarkGray]	1	4	cell part;coated vesicle;COPI vesicle coat;COPI-coated vesicle;cytoplasmic membrane-bounded vesicle;cytoplasmic part;cytoplasmic vesicle;cytoplasmic vesicle part;Golgi apparatus;Golgi apparatus part;Golgi-associated vesicle;intracellular membrane-bounded organelle;intracellular organelle;intracellular organelle part;intracellular part;macromolecular complex;membrane coat;membrane part;membrane-bo…	7	7	7	28.2	28.2	28.2	34.567	0	24.917	354200000	26	25.6351	25.3791	25.5686	25.8396	26.0618	25.9943
+	2.51131	-1.54916	O89086	O89086	RNA-binding protein 3	Rbm3	Color2 [DarkGray]	1	4	cell part;cell projection;cytoplasm;dendrite;intracellular membrane-bounded organelle;intracellular organelle;intracellular part;membrane-bounded organelle;neuron projection;nucleus;organelle	5	5	5	48.4	48.4	48.4	16.604	0	103.84	2158900000	29	27.3149	27.1962	27.3846	29.2656	28.8294	28.4481
+	1.0097	1.35101	O89112	O89112	LanC-like protein 1	Lancl1	Color2 [DarkGray]	1	4	cell part;cytoplasm;extracellular membrane-bounded organelle;extracellular organelle;extracellular region part;extracellular vesicular exosome;intracellular membrane-bounded organelle;intracellular organelle;intracellular part;membrane;membrane-bounded organelle;membrane-bounded vesicle;nucleus;organelle;vesicle	5	5	5	18.3	18.3	18.3	45.341	0	8.7198	157950000	6	24.8508	24.8814	24.9295	23.1901	22.6647	24.7539
+	2.40714	0.940834	P00329	P00329	Alcohol dehydrogenase 1	Adh1	Color2 [DarkGray]	1	4	cell part;cytoplasmic part;intracellular;intracellular membrane-bounded organelle;intracellular organelle;intracellular part;membrane-bounded organelle;mitochondrion;organelle	4	4	4	11.2	11.2	11.2	39.771	0	8.0785	106700000	18	24.552	24.6488	24.5305	23.476	23.942	23.4909
+	1.45226	0.538071	P00405	P00405	Cytochrome c oxidase subunit 2	Mtco2	Color2 [DarkGray]	1	4	cell part;cytoplasmic part;extracellular membrane-bounded organelle;extracellular organelle;extracellular region part;extracellular vesicular exosome;integral to membrane;intracellular membrane-bounded organelle;intracellular organelle;intracellular organelle part;intracellular part;intrinsic to membrane;macromolecular complex;membrane;membrane part;membrane-bounded organelle;membrane-bounded ves…	9	9	9	48	48	48	25.976	0	291.19	135510000000	271	34.458	34.3103	34.6793	34.0585	33.6763	34.0986
+	1.84981	-0.702023	P00493	P00493	Hypoxanthine-guanine phosphoribosyltransferase	Hprt1	Color2 [DarkGray]	1	4	cell part;cytoplasm;cytoplasmic part;cytosol;extracellular membrane-bounded organelle;extracellular organelle;extracellular region part;extracellular vesicular exosome;intracellular part;membrane-bounded organelle;membrane-bounded vesicle;organelle;vesicle	9	9	9	58.3	58.3	58.3	24.57	0	58.851	987500000	40	26.805	26.6206	27.0264	27.7371	27.5029	27.3181
+	1.05345	1.95759	P01899;P01897;P01896	P01899;P01897	H-2 class I histocompatibility antigen, D-B alpha chain;H-2 class I histocompatibility antigen, L-D alpha chain	H2-D1;H2-L	Color2 [DarkGray]	1	4	cell part;cell surface;cytoplasmic part;cytoplasmic vesicle membrane;cytoplasmic vesicle part;endocytic vesicle membrane;endoplasmic reticulum;endoplasmic reticulum exit site;endoplasmic reticulum part;external side of plasma membrane;extracellular membrane-bounded organelle;extracellular organelle;extracellular region part;extracellular vesicular exosome;Golgi apparatus;Golgi apparatus part;Golg…	6	4	2	20.7	14.4	7.7	40.836	0	11.246	133330000	11	25.623	24.6971	24.8894	21.7623	22.9616	24.6127
+	1.21959	1.98958	P01900;P01895;P14427	P01900;P01895	H-2 class I histocompatibility antigen, D-D alpha chain;H-2 class I histocompatibility antigen, alpha chain	H2-D1	Color2 [DarkGray]	1	4	cell part;cell surface;cytoplasmic part;cytoplasmic vesicle membrane;cytoplasmic vesicle part;endocytic vesicle membrane;endoplasmic reticulum;endoplasmic reticulum exit site;endoplasmic reticulum part;external side of plasma membrane;extracellular membrane-bounded organelle;extracellular organelle;extracellular region part;extracellular vesicular exosome;Golgi apparatus;Golgi apparatus part;Golg…	7	7	2	23.6	23.6	8.5	41.11	0	11.394	205510000	10	25.2098	25.233	25.4228	22.2814	22.8218	24.7937
+	2.32135	0.397171	P01942;P06467	P01942	Hemoglobin subunit alpha	Hba	Color2 [DarkGray]	1	4	cell part;cytoplasmic part;cytosolic part;extracellular membrane-bounded organelle;extracellular organelle;extracellular region part;extracellular vesicular exosome;hemoglobin complex;intracellular part;macromolecular complex;membrane-bounded organelle;membrane-bounded vesicle;myelin sheath;organelle;protein complex;vesicle	11	11	9	73.9	73.9	67.6	15.085	0	228.09	333730000000	942	35.9685	35.7819	35.7789	35.4796	35.3836	35.4745
+	2.34574	0.757259	P02088;P02089;CON__Q3SX09	P02088;P02089	Hemoglobin subunit beta-1;Hemoglobin subunit beta-2	Hbb-b1;Hbb-b2	Color2 [DarkGray]	1	4	cell part;cytoplasmic part;cytosolic part;hemoglobin complex;intracellular part;macromolecular complex;myelin sheath;protein complex	12	12	11	78.9	78.9	72.1	15.84	0	323.31	512570000000	823	36.8331	36.4729	36.4496	35.9019	35.8303	35.7515
+	2.37134	-0.480902	P84244;P02301	P84244;P02301	Histone H3.3;Histone H3.3C	H3f3a;H3f3c	Color2 [DarkGray]	1	4	cell part;chromosomal part;intracellular membrane-bounded organelle;intracellular organelle;intracellular organelle part;intracellular part;macromolecular complex;membrane-bounded organelle;nuclear part;nucleoplasm;nucleosome;nucleus;organelle;organelle part;protein-DNA complex	7	7	1	50.7	50.7	23.5	15.328	0	119.02	45552000000	82	32.5983	32.5225	32.4315	33.1313	32.9284	32.9353
+	2.71519	0.780495	P03888	P03888	NADH-ubiquinone oxidoreductase chain 1	Mtnd1	Color2 [DarkGray]	1	4	cell part;cytoplasmic part;integral to membrane;intracellular membrane-bounded organelle;intracellular organelle;intracellular organelle part;intracellular part;intrinsic to membrane;macromolecular complex;membrane part;membrane-bounded organelle;mitochondrial membrane part;mitochondrial part;mitochondrial respiratory chain complex I;mitochondrion;NADH dehydrogenase complex;organelle;organelle pa…	6	6	6	14.8	14.8	14.8	36.059	0	78.216	3737000000	76	29.4434	29.4691	29.61	28.8855	28.5587	28.7369
+	1.87191	0.615372	P04117;P24526;O08716	P04117	Fatty acid-binding protein, adipocyte	Fabp4	Color2 [DarkGray]	1	4	cell part;cytoplasm;extracellular membrane-bounded organelle;extracellular organelle;extracellular region part;extracellular vesicular exosome;intracellular organelle part;intracellular part;membrane-bounded organelle;membrane-bounded vesicle;nuclear part;nucleoplasm;organelle;organelle part;vesicle	13	13	13	75.8	75.8	75.8	14.65	0	150.34	24505000000	266	32.3778	32.0635	31.9375	31.3883	31.6035	31.5409
+	1.44789	0.767075	P04247	P04247	Myoglobin	Mb	Color2 [DarkGray]	1	4	extracellular membrane-bounded organelle;extracellular organelle;extracellular region part;extracellular vesicular exosome;membrane-bounded organelle;membrane-bounded vesicle;organelle;vesicle	21	21	21	94.8	94.8	94.8	17.069	0	323.31	198830000000	624	35.2191	35.4222	35.1096	34.1076	34.4457	34.8964
+	2.65591	0.644951	P05201	P05201	Aspartate aminotransferase, cytoplasmic	Got1	Color2 [DarkGray]	1	4	axon part;axon terminus;cell part;cell projection part;cytoplasm;cytoplasmic part;cytosol;extracellular membrane-bounded organelle;extracellular organelle;extracellular region part;extracellular vesicular exosome;intracellular membrane-bounded organelle;intracellular organelle;intracellular part;lysosome;lytic vacuole;membrane-bounded organelle;membrane-bounded vesicle;neuron projection terminus;…	29	29	29	78.2	78.2	78.2	46.247	0	323.31	40772000000	354	32.8322	32.9932	33.0456	32.229	32.264	32.4432
+	2.53804	0.546043	P05202	P05202	Aspartate aminotransferase, mitochondrial	Got2	Color2 [DarkGray]	1	4	cell part;cytoplasmic part;extracellular membrane-bounded organelle;extracellular organelle;extracellular region part;extracellular vesicular exosome;intracellular membrane-bounded organelle;intracellular organelle;intracellular organelle lumen;intracellular organelle part;intracellular part;membrane;membrane-bounded organelle;membrane-bounded vesicle;membrane-enclosed lumen;mitochondrial inner m…	32	32	32	70.2	70.2	70.2	47.411	0	323.31	110410000000	671	34.357	34.2335	34.4046	33.6585	33.8133	33.885
+	1.5484	1.41075	P06801	P06801	NADP-dependent malic enzyme	Me1	Color2 [DarkGray]	1	4	cell part;cytoplasmic part;cytosol;intracellular membrane-bounded organelle;intracellular organelle;intracellular part;membrane-bounded organelle;mitochondrion;organelle	14	14	14	36.7	36.7	36.7	63.953	0	68.281	827540000	31	28.3104	26.9334	27.3616	26.2408	25.9184	26.214
+	2.13305	-1.14843	P07214	P07214	SPARC	Sparc	Color2 [DarkGray]	1	4	basement membrane;cell part;cell surface;cytoplasmic membrane-bounded vesicle;cytoplasmic part;cytoplasmic vesicle;cytoplasmic vesicle membrane;cytoplasmic vesicle part;extracellular matrix;extracellular matrix part;extracellular region part;extracellular space;intracellular membrane-bounded organelle;intracellular organelle;intracellular organelle part;intracellular part;membrane;membrane-bounde…	9	9	9	31.1	31.1	31.1	34.45	0	30.65	616210000	35	26.0073	25.5545	25.9192	26.6894	27.3127	26.9242
+	2.40869	0.966746	P07310	P07310	Creatine kinase M-type	Ckm	Color2 [DarkGray]	1	4	cell part;cytoplasm;intracellular part	30	30	28	68.2	68.2	66.1	43.044	0	323.31	121820000000	678	34.4804	34.5704	34.6716	33.3723	33.5591	33.8907
+	1.70569	-0.459159	P07356;REV__Q8BND4	P07356	Annexin A2	Anxa2	Color2 [DarkGray]	1	4	basement membrane;basolateral plasma membrane;cell cortex;cell part;cell projection;cell surface;cytoplasm;cytoplasmic membrane-bounded vesicle;cytoplasmic part;cytoplasmic vesicle;cytosol;early endosome;endosomal part;endosome;endosome membrane;extracellular matrix part;extracellular membrane-bounded organelle;extracellular organelle;extracellular region part;extracellular space;extracellular ve…	29	29	29	67.8	67.8	67.8	38.676	0	323.31	12221000000	252	30.6543	30.4353	30.8093	31.1678	31.1252	30.9835
+	4.19325	-1.2244	P07901	P07901	Heat shock protein HSP 90-alpha	Hsp90aa1	Color2 [DarkGray]	1	4	apical plasma membrane;basolateral plasma membrane;brush border membrane;cell body;cell part;cell projection;cell projection membrane;cell projection part;cell surface;cytoplasm;cytoplasmic membrane-bounded vesicle;cytoplasmic part;cytoplasmic vesicle;cytosol;extracellular matrix;extracellular membrane-bounded organelle;extracellular organelle;extracellular region part;extracellular vesicular exo…	38	23	23	53.2	36.7	36.7	84.787	0	263.64	4442400000	168	28.6071	28.5476	28.7728	29.8935	29.8803	29.8269
+	2.33892	-0.899061	P08030	P08030	Adenine phosphoribosyltransferase	Aprt	Color2 [DarkGray]	1	4	cell part;cytoplasm;extracellular membrane-bounded organelle;extracellular organelle;extracellular region part;extracellular vesicular exosome;intracellular organelle part;intracellular part;membrane-bounded organelle;membrane-bounded vesicle;nuclear part;nucleoplasm;organelle;organelle part;vesicle	3	3	3	16.7	16.7	16.7	19.724	0	3.4671	138380000	12	23.8082	23.711	24.0371	24.8347	24.9107	24.5082
+	2.5762	0.799669	P08032	P08032	Spectrin alpha chain, erythrocytic 1	Spta1	Color2 [DarkGray]	1	4	cell cortex part;cell part;cortical cytoskeleton;cuticular plate;cytoplasmic part;cytoskeletal part;cytoskeleton;intracellular non-membrane-bounded organelle;intracellular organelle;intracellular organelle part;intracellular part;membrane;non-membrane-bounded organelle;organelle;organelle part;spectrin;spectrin-associated cytoskeleton	31	30	30	16.4	15.9	15.9	279.86	0	78.348	808780000	63	27.548	27.2363	27.3897	26.7511	26.5111	26.5127
+	1.4891	-0.90847	P08122	P08122	Collagen alpha-2(IV) chain;Canstatin	Col4a2	Color2 [DarkGray]	1	4	basement membrane;cell part;collagen;collagen type IV;extracellular matrix;extracellular matrix part;extracellular membrane-bounded organelle;extracellular organelle;extracellular region;extracellular region part;extracellular vesicular exosome;intracellular membrane-bounded organelle;intracellular organelle;intracellular part;membrane-bounded organelle;membrane-bounded vesicle;organelle;sheet-fo…	10	10	10	9.5	9.5	9.5	167.32	0	83.618	2325300000	54	27.528	28.0511	28.078	29.199	28.7347	28.4488
+	2.49659	0.572849	P08249	P08249	Malate dehydrogenase, mitochondrial	Mdh2	Color2 [DarkGray]	1	4	cell part;cytoplasmic part;extracellular membrane-bounded organelle;extracellular organelle;extracellular region part;extracellular vesicular exosome;intracellular membrane-bounded organelle;intracellular organelle;intracellular organelle lumen;intracellular organelle part;intracellular part;membrane;membrane-bounded organelle;membrane-bounded vesicle;membrane-enclosed lumen;mitochondrial inner m…	21	21	21	68	68	68	35.611	0	323.31	201330000000	686	35.1758	35.2769	35.1951	34.4835	34.672	34.7738
+	3.31126	-0.840242	P09103	P09103	Protein disulfide-isomerase	P4hb	Color2 [DarkGray]	1	4	adherens junction;anchoring junction;cell junction;cell part;cell-substrate adherens junction;cell-substrate junction;cytoplasmic membrane-bounded vesicle;cytoplasmic part;cytoplasmic vesicle;endoplasmic reticulum;endoplasmic reticulum chaperone complex;endoplasmic reticulum lumen;endoplasmic reticulum part;endoplasmic reticulum-Golgi intermediate compartment;extracellular membrane-bounded organe…	29	29	29	57.8	57.8	57.8	57.058	0	263.55	7702300000	203	29.7805	29.5942	29.7394	30.5235	30.6546	30.4568
+	2.89388	-0.652167	P09405	P09405	Nucleolin	Ncl	Color2 [DarkGray]	1	4	cell cortex;cell part;cytoplasmic part;extracellular membrane-bounded organelle;extracellular organelle;extracellular region part;extracellular vesicular exosome;intracellular membrane-bounded organelle;intracellular non-membrane-bounded organelle;intracellular organelle;intracellular organelle part;intracellular part;macromolecular complex;membrane;membrane-bounded organelle;membrane-bounded ves…	18	18	18	26.3	26.3	26.3	76.722	0	95.927	2765100000	88	28.3721	28.277	28.386	28.8932	29.1382	28.9601
+	2.04447	-2.91787	P09470	P09470	Angiotensin-converting enzyme;Angiotensin-converting enzyme, soluble form	Ace	Color2 [DarkGray]	1	4	cell part;cytoplasm;cytoplasmic part;endosome;external side of plasma membrane;extracellular membrane-bounded organelle;extracellular organelle;extracellular region part;extracellular space;extracellular vesicular exosome;integral to membrane;intracellular membrane-bounded organelle;intracellular organelle;intracellular part;intrinsic to membrane;lysosome;lytic vacuole;membrane;membrane part;memb…	27	27	27	28.2	28.2	28.2	150.92	0	88.231	990750000	57	25.2665	24.2821	25.0774	28.8652	27.221	27.2933
+	2.66093	-1.26492	P09528	P09528	Ferritin heavy chain;Ferritin heavy chain, N-terminally processed	Fth1	Color2 [DarkGray]	1	4	cell part;cytoplasmic membrane-bounded vesicle lumen;cytoplasmic part;cytoplasmic vesicle part;endocytic vesicle lumen;extracellular membrane-bounded organelle;extracellular organelle;extracellular region;extracellular region part;extracellular vesicular exosome;intracellular membrane-bounded organelle;intracellular organelle;intracellular organelle part;intracellular part;membrane-bounded organe…	11	11	11	69.2	69.2	69.2	21.066	0	101.24	2127300000	59	27.5339	27.8054	27.2987	28.9056	28.927	28.6001
+	2.63592	-1.16138	P10107;A2BH40	P10107	Annexin A1	Anxa1	Color2 [DarkGray]	1	4	adherens junction;anchoring junction;basolateral plasma membrane;cell junction;cell part;cell projection;cell surface;cell-substrate adherens junction;cell-substrate junction;chromatin;chromatin remodeling complex;chromosomal part;cilium;cornified envelope;cytoplasm;cytoplasmic part;cytoskeleton;cytosol;endosome;extracellular membrane-bounded organelle;extracellular organelle;extracellular region…	17	17	17	56.6	56.6	56.6	38.734	0	170.44	2024200000	73	27.6027	27.2961	27.7311	28.6542	28.9118	28.548
+	3.20236	-1.7262	P10126	P10126	Elongation factor 1-alpha 1	Eef1a1	Color2 [DarkGray]	1	4	cell cortex part;cell part;cell projection membrane;cell projection part;cortical actin cytoskeleton;cortical cytoskeleton;cytoplasm;cytoplasmic part;cytoskeletal part;cytoskeleton;cytosol;extracellular membrane-bounded organelle;extracellular organelle;extracellular region part;extracellular space;extracellular vesicular exosome;intracellular membrane-bounded organelle;intracellular non-membrane…	27	16	16	74	43.9	43.9	50.113	0	323.31	29124000000	173	31.1071	30.6198	31.1157	32.7794	32.6965	32.5454
+	2.4786	0.943415	P10518	P10518	Delta-aminolevulinic acid dehydratase	Alad	Color2 [DarkGray]	1	4	cell part;cytoplasmic part;cytosol;extracellular membrane-bounded organelle;extracellular organelle;extracellular region part;extracellular vesicular exosome;intracellular membrane-bounded organelle;intracellular organelle;intracellular part;membrane-bounded organelle;membrane-bounded vesicle;nucleus;organelle;vesicle	6	6	6	26.1	26.1	26.1	36.023	0	18.191	419870000	21	26.4156	26.3004	26.7528	25.6697	25.5221	25.4467
+	1.31793	0.728109	P10637	P10637	Microtubule-associated protein tau	Mapt	Color2 [DarkGray]	1	4	axon;axoneme;cell part;cell projection;cell projection part;cytoplasm;cytoplasmic part;cytoskeletal part;cytoskeleton;cytosol;growth cone;intracellular membrane-bounded organelle;intracellular non-membrane-bounded organelle;intracellular organelle;intracellular organelle part;intracellular part;macromolecular complex;membrane;membrane-bounded organelle;microtubule;microtubule cytoskeleton;neuron …	3	3	3	5.9	5.9	5.9	76.243	0	5.8786	69687000	9	23.7343	23.6694	23.9262	22.5711	23.1777	23.3968
+	2.50039	0.403015	P10639	P10639	Thioredoxin	Txn	Color2 [DarkGray]	1	4	cell part;cytoplasm;cytoplasmic part;cytosol;extracellular membrane-bounded organelle;extracellular organelle;extracellular region part;extracellular vesicular exosome;intracellular membrane-bounded organelle;intracellular organelle;intracellular part;membrane-bounded organelle;membrane-bounded vesicle;mitochondrion;nucleus;organelle;vesicle	5	5	5	49.5	49.5	49.5	11.675	0	17.218	2083600000	56	28.6419	28.45	28.471	28.1478	28.0842	28.1219
+	3.41215	1.00688	P10649	P10649	Glutathione S-transferase Mu 1	Gstm1	Color2 [DarkGray]	1	4	cell part;cytoplasm;intracellular part;myelin sheath	13	10	8	59.6	44	36.2	25.97	0	68.877	3017000000	73	29.2651	29.2964	29.414	28.1634	28.3652	28.4263
+	1.79785	-0.666342	P11438	P11438	Lysosome-associated membrane glycoprotein 1	Lamp1	Color2 [DarkGray]	1	4	cell body;cell part;cell projection;cell surface;clathrin-coated vesicle;coated vesicle;cytolytic granule;cytoplasm;cytoplasmic membrane-bounded vesicle;cytoplasmic part;cytoplasmic vesicle;dendrite;endosomal part;endosome;endosome membrane;external side of plasma membrane;extracellular membrane-bounded organelle;extracellular organelle;extracellular region part;extracellular vesicular exosome;in…	4	4	4	11.1	11.1	11.1	43.865	0	14.627	312450000	13	25.2053	25.4726	24.9078	25.9155	25.8592	25.8099
+	1.38546	-0.770741	P11688	P11688	Integrin alpha-5;Integrin alpha-5 heavy chain;Integrin alpha-5 light chain	Itga5	Color2 [DarkGray]	1	4	adherens junction;anchoring junction;cell junction;cell part;cell projection membrane;cell projection part;cell surface;cell-cell junction;cell-substrate adherens junction;cell-substrate junction;cytoplasmic part;cytoplasmic vesicle;endoplasmic reticulum;external side of plasma membrane;focal adhesion;Golgi apparatus;integrin complex;intracellular membrane-bounded organelle;intracellular organell…	6	6	6	6.2	6.2	6.2	115.04	0	11.68	171560000	15	24.2078	24.2096	24.2085	25.4922	24.6533	24.7926
+	2.91167	-0.628418	P11983	P11983	T-complex protein 1 subunit alpha	Tcp1	Color2 [DarkGray]	1	4	acrosomal vesicle;cell body;cell part;centrosome;chaperonin-containing T-complex;chromatin;chromosomal part;cytoplasmic membrane-bounded vesicle;cytoplasmic part;cytoplasmic vesicle;cytoskeletal part;cytosolic part;extracellular membrane-bounded organelle;extracellular organelle;extracellular region part;extracellular vesicular exosome;Golgi apparatus;heterochromatin;intracellular membrane-bounde…	21	21	21	47.5	47.5	47.5	60.448	0	181.09	3710400000	119	28.6388	28.8498	28.881	29.4049	29.4085	29.4416
+	0.712855	3.47629	P12242	P12242	Mitochondrial brown fat uncoupling protein 1	Ucp1	Color2 [DarkGray]	1	4	cell part;cytoplasmic part;envelope;integral to membrane;intracellular membrane-bounded organelle;intracellular organelle;intracellular organelle part;intracellular part;intrinsic to membrane;membrane;membrane part;membrane-bounded organelle;mitochondrial envelope;mitochondrial inner membrane;mitochondrial membrane;mitochondrial part;mitochondrion;organelle;organelle envelope;organelle inner memb…	13	13	13	59	59	59	33.247	0	102.33	1203700000	23	30.1303	23.0205	24.0054	22.4866	22.21	22.0307
+	2.61296	0.761192	P12367	P12367	cAMP-dependent protein kinase type II-alpha regulatory subunit	Prkar2a	Color2 [DarkGray]	1	4	adherens junction;AMP-activated protein kinase complex;anchoring junction;cAMP-dependent protein kinase complex;cell junction;cell part;cell-substrate adherens junction;cell-substrate junction;centrosome;cytoplasm;cytoplasmic part;cytoskeletal part;extracellular membrane-bounded organelle;extracellular organelle;extracellular region part;extracellular vesicular exosome;focal adhesion;intracellula…	9	9	6	26.7	26.7	16.5	45.389	0	29.425	762770000	52	27.3482	27.2042	27.2072	26.3273	26.4722	26.6765
+	2.26871	0.549466	P12787	P12787	Cytochrome c oxidase subunit 5A, mitochondrial	Cox5a	Color2 [DarkGray]	1	4	cell part;cytoplasmic part;extracellular membrane-bounded organelle;extracellular organelle;extracellular region part;extracellular vesicular exosome;intracellular membrane-bounded organelle;intracellular organelle;intracellular organelle part;intracellular part;membrane;membrane-bounded organelle;membrane-bounded vesicle;mitochondrial inner membrane;mitochondrial membrane;mitochondrial part;mito…	10	10	10	59.6	59.6	59.6	16.101	0	163.68	51902000000	187	33.3088	33.1584	33.2753	32.7295	32.5302	32.8344
+	3.51542	1.31371	P13634	P13634	Carbonic anhydrase 1	Ca1	Color2 [DarkGray]	1	4	cell part;cytoplasm;extracellular membrane-bounded organelle;extracellular organelle;extracellular region part;extracellular vesicular exosome;intracellular part;membrane-bounded organelle;membrane-bounded vesicle;organelle;vesicle	4	4	4	29.1	29.1	29.1	28.33	0	26.614	149850000	20	25.1523	24.9676	25.2401	23.9627	23.7393	23.7168
+	2.15562	-1.30448	P14069	P14069	Protein S100-A6	S100a6	Color2 [DarkGray]	1	4	cell part;cell projection;cytoplasm;cytoplasmic part;cytosol;envelope;extracellular membrane-bounded organelle;extracellular organelle;extracellular region part;extracellular vesicular exosome;extrinsic to internal side of plasma membrane;extrinsic to membrane;extrinsic to plasma membrane;intracellular membrane-bounded organelle;intracellular organelle;intracellular organelle part;intracellular p…	4	4	4	43.8	43.8	43.8	10.051	0	11.728	783830000	16	26.5121	26.0906	25.6418	27.2911	27.4468	27.42
+	2.47858	0.69935	P14094	P14094	Sodium/potassium-transporting ATPase subunit beta-1	Atp1b1	Color2 [DarkGray]	1	4	apical plasma membrane;basolateral plasma membrane;caveola;cell junction;cell part;cell-cell contact zone;cell-cell junction;extracellular membrane-bounded organelle;extracellular organelle;extracellular region part;extracellular vesicular exosome;intercalated disc;macromolecular complex;membrane;membrane part;membrane raft;membrane-bounded organelle;membrane-bounded vesicle;myelin sheath;organel…	15	15	15	48	48	48	35.194	0	108.37	6573400000	147	30.1047	30.4297	30.3767	29.5083	29.6408	29.6639
+	3.47454	1.67458	P14142	P14142	Solute carrier family 2, facilitated glucose transporter member 4	Slc2a4	Color2 [DarkGray]	1	4	cell part;clathrin-coated vesicle;coated pit;coated vesicle;cytoplasmic membrane-bounded vesicle;cytoplasmic part;cytoplasmic vesicle;cytoplasmic vesicle membrane;cytoplasmic vesicle part;cytosol;endomembrane system;endosome;external side of plasma membrane;extracellular membrane-bounded organelle;extracellular organelle;extracellular region part;extracellular vesicular exosome;Golgi apparatus pa…	4	4	4	8.3	8.3	8.3	54.755	0	27.158	648720000	20	27.5581	27.0801	27.3719	25.7508	25.6411	25.5944
+	2.32182	-0.697734	P14148	P14148	60S ribosomal protein L7	Rpl7	Color2 [DarkGray]	1	4	adherens junction;anchoring junction;cell junction;cell part;cell-substrate adherens junction;cell-substrate junction;cytoplasm;cytosolic large ribosomal subunit;extracellular membrane-bounded organelle;extracellular organelle;extracellular region part;extracellular vesicular exosome;focal adhesion;intracellular membrane-bounded organelle;intracellular non-membrane-bounded organelle;intracellular…	12	12	12	42.2	42.2	42.2	31.419	0	98.148	3363900000	68	28.6703	28.7684	28.4704	29.1783	29.3477	29.4763
+	2.00497	0.52419	P14152	P14152	Malate dehydrogenase, cytoplasmic	Mdh1	Color2 [DarkGray]	1	4	cell part;centrosome;cytoplasm;cytoplasmic part;cytoskeletal part;cytosol;extracellular membrane-bounded organelle;extracellular organelle;extracellular region part;extracellular space;extracellular vesicular exosome;intracellular membrane-bounded organelle;intracellular non-membrane-bounded organelle;intracellular organelle;intracellular organelle part;intracellular part;membrane-bounded organel…	16	16	16	45.5	45.5	45.5	36.511	0	276.99	89099000000	271	33.9841	34.042	34.0266	33.3115	33.4706	33.698
+	2.7466	-1.21911	P14602	P14602	Heat shock protein beta-1	Hspb1	Color2 [DarkGray]	1	4	adherens junction;anchoring junction;cell junction;cell part;cell-substrate adherens junction;cell-substrate junction;contractile fiber;contractile fiber part;cytoplasm;cytoplasmic part;cytoskeletal part;extracellular membrane-bounded organelle;extracellular organelle;extracellular region part;extracellular space;extracellular vesicular exosome;focal adhesion;intracellular;intracellular membrane-…	17	17	17	78.5	78.5	78.5	23.014	0	231.02	13470000000	185	30.2366	30.1898	30.2922	31.4369	31.7502	31.1888
+	4.10146	-0.678664	P14685	P14685	26S proteasome non-ATPase regulatory subunit 3	Psmd3	Color2 [DarkGray]	1	4	cell part;cytoplasm;extracellular membrane-bounded organelle;extracellular organelle;extracellular region part;extracellular vesicular exosome;intracellular membrane-bounded organelle;intracellular organelle;intracellular organelle part;intracellular part;macromolecular complex;membrane;membrane-bounded organelle;membrane-bounded vesicle;nuclear part;nucleoplasm;nucleus;organelle;organelle part;p…	16	16	16	30.4	30.4	30.4	60.718	0	49.739	1072100000	60	26.9464	26.9578	26.9885	27.7209	27.5975	27.6103
+	2.20567	-3.77226	P14873	P14873	Microtubule-associated protein 1B;MAP1B heavy chain;MAP1 light chain LC1	Map1b	Color2 [DarkGray]	1	4	cell junction;cell part;cell projection;cell projection part;cilium;cytoplasm;cytoplasmic part;cytoskeletal part;cytosol;dendritic spine;intracellular organelle part;intracellular part;macromolecular complex;membrane;microtubule;microtubule associated complex;neuron projection;neuron spine;nonmotile primary cilium;organelle part;photoreceptor outer segment;plasma membrane;postsynaptic density;pri…	12	12	12	8.7	8.7	8.7	270.25	0	28.319	249380000	18	21.206	23.6591	22.2099	26.2839	26.0809	26.027
+	2.82787	0.702042	P15508	P15508	Spectrin beta chain, erythrocytic	Sptb	Color2 [DarkGray]	1	4	cell cortex part;cell part;cell surface;cortical cytoskeleton;cytoplasm;cytoplasmic part;cytoskeletal part;cytoskeleton;intracellular non-membrane-bounded organelle;intracellular organelle;intracellular organelle part;intracellular part;macromolecular complex;membrane;non-membrane-bounded organelle;organelle;organelle part;plasma membrane;protein complex;spectrin;spectrin-associated cytoskeleton	47	43	43	28.3	26.2	26.2	245.25	0	147.93	1688500000	121	28.3782	28.2971	28.5271	27.7789	27.737	27.5804
+	1.89708	0.717384	P15626;O35660	P15626	Glutathione S-transferase Mu 2	Gstm2	Color2 [DarkGray]	1	4	cell part;cytoplasm;intracellular part	17	17	11	78	78	48.2	25.716	0	56.39	4781300000	80	29.8424	29.8356	30.0284	28.8898	29.4121	29.2523
+	0.920054	3.0958	P16015	P16015	Carbonic anhydrase 3	Ca3	Color2 [DarkGray]	1	4	cell part;cytoplasmic part;cytosol;intracellular part	12	12	12	64.2	64.2	64.2	29.366	0	71.279	813140000	22	29.2435	24.1914	27.2394	23.0182	23.4873	24.8813
+	2.08458	-0.623278	P16045	P16045	Galectin-1	Lgals1	Color2 [DarkGray]	1	4	cell part;cell surface;cytoplasm;extracellular matrix;extracellular membrane-bounded organelle;extracellular organelle;extracellular region part;extracellular space;extracellular vesicular exosome;intracellular;intracellular membrane-bounded organelle;intracellular organelle;intracellular part;membrane-bounded organelle;membrane-bounded vesicle;nucleus;organelle;proteinaceous extracellular matrix…	11	11	11	94.1	94.1	94.1	14.866	0	248.37	10128000000	96	30.2822	30.256	30.1689	30.6264	31.0465	30.904
+	2.67615	-2.99614	P16110	P16110	Galectin-3	Lgals3	Color2 [DarkGray]	1	4	cell part;cell surface;cytoplasm;cytoplasmic part;external side of plasma membrane;extracellular matrix;extracellular membrane-bounded organelle;extracellular organelle;extracellular region part;extracellular space;extracellular vesicular exosome;immunological synapse;intracellular membrane-bounded organelle;intracellular organelle;intracellular organelle part;intracellular part;macromolecular co…	6	6	6	24.6	24.6	24.6	27.515	0	23.857	426480000	15	24.1426	23.4337	23.5498	27.3786	26.5986	26.1373
+	3.91144	0.780069	P16125	P16125	L-lactate dehydrogenase B chain	Ldhb	Color2 [DarkGray]	1	4	cell part;cytoplasm;cytoplasmic part;extracellular membrane-bounded organelle;extracellular organelle;extracellular region part;extracellular vesicular exosome;intracellular membrane-bounded organelle;intracellular organelle;intracellular part;membrane;membrane-bounded organelle;membrane-bounded vesicle;mitochondrion;myelin sheath;organelle;vesicle	20	20	19	62.3	62.3	58.7	36.572	0	323.31	54544000000	315	33.4004	33.4091	33.3843	32.5159	32.6892	32.6486
+	3.37542	1.14629	P16332	P16332	Methylmalonyl-CoA mutase, mitochondrial	Mut	Color2 [DarkGray]	1	4	cell part;cytoplasmic part;intracellular membrane-bounded organelle;intracellular organelle;intracellular organelle lumen;intracellular organelle part;intracellular part;membrane-bounded organelle;membrane-enclosed lumen;mitochondrial matrix;mitochondrial part;mitochondrion;organelle;organelle lumen;organelle part	18	18	18	33	33	33	82.843	0	77.167	1449900000	88	28.2104	28.3678	28.4527	27.0444	27.3101	27.2375
+	1.67553	-2.51102	P16460	P16460	Argininosuccinate synthase	Ass1	Color2 [DarkGray]	1	4	cell part;cytoplasmic part;extracellular membrane-bounded organelle;extracellular organelle;extracellular region part;extracellular vesicular exosome;intracellular membrane-bounded organelle;intracellular organelle;intracellular part;membrane-bounded organelle;membrane-bounded vesicle;mitochondrion;myelin sheath;organelle;vesicle	8	8	8	20.1	20.1	20.1	46.584	0	22.145	156420000	14	21.7255	24.0533	23.2053	25.4983	25.5795	25.4394
+	2.91826	0.752444	P16858;Q64467	P16858	Glyceraldehyde-3-phosphate dehydrogenase	Gapdh	Color2 [DarkGray]	1	4	cell part;cell projection;cell projection part;cilium;cytoplasm;cytoplasmic part;cytoskeleton;cytosol;flagellar fibrous sheath;flagellum part;intracellular membrane-bounded organelle;intracellular non-membrane-bounded organelle;intracellular organelle;intracellular organelle part;intracellular part;membrane-bounded organelle;microtubule cytoskeleton;microtubule-based flagellum part;motile cilium;…	23	23	23	83.2	83.2	83.2	35.81	0	323.31	130580000000	1015	34.7235	34.5086	34.4434	33.8362	33.7351	33.8469
+	3.37221	1.47986	P17563;Q63836	P17563;Q63836	Selenium-binding protein 1;Selenium-binding protein 2	Selenbp1;Selenbp2	Color2 [DarkGray]	1	4	cell part;cytoplasmic part;cytosol;extracellular membrane-bounded organelle;extracellular organelle;extracellular region part;extracellular space;extracellular vesicular exosome;intracellular non-membrane-bounded organelle;intracellular organelle;intracellular organelle part;intracellular part;membrane;membrane-bounded organelle;membrane-bounded vesicle;non-membrane-bounded organelle;nuclear part…	25	25	25	68	68	68	52.513	0	218.74	4027000000	149	30.016	29.8373	29.9382	28.2301	28.4498	28.672
+	2.59844	-3.43485	Q61696;P17879	Q61696;P17879	Heat shock 70 kDa protein 1A;Heat shock 70 kDa protein 1B	Hspa1a;Hspa1b	Color2 [DarkGray]	1	4	cell part;cytoplasm;cytoplasmic part;intracellular membrane-bounded organelle;intracellular organelle;intracellular organelle part;intracellular part;membrane-bounded organelle;nuclear body;nuclear part;nuclear speck;nucleoplasm part;nucleus;organelle;organelle part;perinuclear region of cytoplasm	20	15	10	42.4	32.8	25	70.078	0	102.18	904900000	52	24.816	24.1006	24.1977	26.8957	28.3392	28.1839
+	1.87125	0.452623	P18572	P18572	Basigin	Bsg	Color2 [DarkGray]	1	4	acrosomal membrane;adherens junction;anchoring junction;cell junction;cell part;cell-substrate adherens junction;cell-substrate junction;cytoplasmic membrane-bounded vesicle;cytoplasmic part;cytoplasmic vesicle;cytoplasmic vesicle membrane;cytoplasmic vesicle part;extracellular membrane-bounded organelle;extracellular organelle;extracellular region part;extracellular vesicular exosome;focal adhes…	9	9	9	25.7	25.7	25.7	42.444	0	67.968	2552200000	39	28.8745	29.0346	28.7783	28.5763	28.4432	28.3102
+	2.11091	-0.581195	P18760	P18760	Cofilin-1	Cfl1	Color2 [DarkGray]	1	4	adherens junction;anchoring junction;cell cortex part;cell junction;cell part;cell projection membrane;cell projection part;cell-cell junction;cell-substrate adherens junction;cell-substrate junction;cortical actin cytoskeleton;cortical cytoskeleton;cytoplasm;cytoplasmic part;cytoskeletal part;cytoskeleton;cytosol;extracellular membrane-bounded organelle;extracellular organelle;extracellular regi…	14	14	12	71.1	71.1	60.2	18.559	0	250.19	8640700000	121	30.1015	29.8895	30.2094	30.587	30.7882	30.5688
+	1.85198	-0.891691	P18872	P18872	Guanine nucleotide-binding protein G(o) subunit alpha	Gnao1	Color2 [DarkGray]	1	4	cell part;cell projection;dendrite;extrinsic to internal side of plasma membrane;extrinsic to membrane;extrinsic to plasma membrane;heterotrimeric G-protein complex;intracellular;intracellular part;macromolecular complex;membrane;membrane part;myelin sheath;neuron projection;plasma membrane;plasma membrane part;protein complex	7	5	5	22.3	15.8	15.8	40.084	0	17.882	233070000	20	24.8535	24.7304	24.2654	25.7419	25.3793	25.4032
+	1.66836	0.802947	P19123	P19123	Troponin C, slow skeletal and cardiac muscles	Tnnc1	Color2 [DarkGray]	1	4	actin cytoskeleton;cell part;contractile fiber part;cytoplasmic part;cytoskeletal part;cytoskeleton;intracellular membrane-bounded organelle;intracellular non-membrane-bounded organelle;intracellular organelle;intracellular organelle part;intracellular part;macromolecular complex;membrane-bounded organelle;mitochondrion;non-membrane-bounded organelle;nuclear part;nucleoplasm;organelle;organelle p…	10	10	10	62.7	62.7	62.7	18.42	0	323.31	20925000000	272	31.9905	31.7102	32.1369	31.2176	30.8011	31.41
+	3.18145	0.899921	P19157;P46425	P19157;P46425	Glutathione S-transferase P 1;Glutathione S-transferase P 2	Gstp1;Gstp2	Color2 [DarkGray]	1	4	cell part;cytoplasm;cytoplasmic part;cytosol;extracellular membrane-bounded organelle;extracellular organelle;extracellular region part;extracellular space;extracellular vesicular exosome;intracellular;intracellular membrane-bounded organelle;intracellular organelle;intracellular part;macromolecular complex;membrane;membrane-bounded organelle;membrane-bounded vesicle;mitochondrion;nucleus;organel…	8	8	8	44.3	44.3	44.3	23.609	0	174.55	3648800000	84	29.6036	29.5635	29.4719	28.4805	28.7635	28.6953
+	2.21512	0.436715	P19783	P19783	Cytochrome c oxidase subunit 4 isoform 1, mitochondrial	Cox4i1	Color2 [DarkGray]	1	4	cell part;cytoplasmic part;extracellular membrane-bounded organelle;extracellular organelle;extracellular region part;extracellular vesicular exosome;intracellular membrane-bounded organelle;intracellular organelle;intracellular organelle part;intracellular part;membrane;membrane-bounded organelle;membrane-bounded vesicle;mitochondrial inner membrane;mitochondrial membrane;mitochondrial part;mito…	16	16	16	65.7	65.7	65.7	19.53	0	187.65	61657000000	409	33.3594	33.3441	33.5354	32.9652	32.887	33.0766
+	2.46356	0.804973	P20108	P20108	Thioredoxin-dependent peroxide reductase, mitochondrial	Prdx3	Color2 [DarkGray]	1	4	cell part;cytoplasm;cytoplasmic part;cytosol;cytosolic part;early endosome;endosome;extracellular membrane-bounded organelle;extracellular organelle;extracellular region part;extracellular vesicular exosome;IkappaB kinase complex;intracellular membrane-bounded organelle;intracellular organelle;intracellular part;macromolecular complex;membrane-bounded organelle;membrane-bounded vesicle;mitochondr…	9	9	9	52.1	52.1	52.1	28.127	0	295.15	10000000000	152	31.0734	30.9788	30.8701	29.9727	30.1612	30.3735
+	2.53919	0.895888	P21550	P21550	Beta-enolase	Eno3	Color2 [DarkGray]	1	4	cell part;cytoplasm;cytoplasmic part;cytosolic part;extracellular membrane-bounded organelle;extracellular organelle;extracellular region part;extracellular space;extracellular vesicular exosome;intracellular part;macromolecular complex;membrane;membrane-bounded organelle;membrane-bounded vesicle;organelle;phosphopyruvate hydratase complex;plasma membrane;protein complex;vesicle	30	30	24	64.5	64.5	47.7	47.024	0	323.31	51133000000	381	33.2316	33.5803	33.2116	32.3292	32.4409	32.5657
+	2.26925	-1.3773	P21981;Q9D7I9	P21981	Protein-glutamine gamma-glutamyltransferase 2	Tgm2	Color2 [DarkGray]	1	4	adherens junction;anchoring junction;cell junction;cell part;cell-substrate adherens junction;cell-substrate junction;cytoplasm;cytoplasmic part;cytosol;extracellular matrix;extracellular membrane-bounded organelle;extracellular organelle;extracellular region part;extracellular vesicular exosome;focal adhesion;intracellular membrane-bounded organelle;intracellular organelle;intracellular part;int…	32	32	32	55.4	55.4	55.4	77.06	0	323.31	11509000000	236	29.9303	29.8271	29.8508	31.6701	31.2625	30.8075
+	1.41015	-0.59218	P22892	P22892	AP-1 complex subunit gamma-1	Ap1g1	Color2 [DarkGray]	1	4	AP-type membrane coat adaptor complex;cell part;clathrin adaptor complex;clathrin coated vesicle membrane;clathrin-coated vesicle;coated vesicle;coated vesicle membrane;cytoplasm;cytoplasmic membrane-bounded vesicle;cytoplasmic part;cytoplasmic vesicle;cytoplasmic vesicle membrane;cytoplasmic vesicle part;endosome;Golgi apparatus;Golgi apparatus part;intracellular membrane-bounded organelle;intra…	6	6	6	8.9	8.9	8.9	91.349	0	23.416	281990000	18	25.4503	25.0465	24.7777	25.6774	25.6734	25.7002
+	1.36046	1.79682	P22907	P22907	Porphobilinogen deaminase	Hmbs	Color2 [DarkGray]	1	4		3	3	3	13.6	13.6	13.6	39.344	0	7.35	96755000	6	24.8725	24.29	24.7089	22.0193	22.4806	23.9811
+	3.85964	-0.529351	P23116	P23116	Eukaryotic translation initiation factor 3 subunit A	Eif3a	Color2 [DarkGray]	1	4	cell part;cytoplasm;cytoplasmic part;cytoskeletal part;eukaryotic 43S preinitiation complex;eukaryotic 48S preinitiation complex;eukaryotic translation initiation factor 3 complex;eukaryotic translation initiation factor 3 complex, eIF3m;intracellular membrane-bounded organelle;intracellular non-membrane-bounded organelle;intracellular organelle;intracellular organelle part;intracellular part;mac…	29	29	29	23.1	23.1	23.1	161.93	0	85.431	2639000000	111	28.4148	28.3177	28.4129	28.8968	28.9477	28.889
+	2.65312	-0.43784	P23591	P23591	GDP-L-fucose synthase	Tsta3	Color2 [DarkGray]	1	4	extracellular membrane-bounded organelle;extracellular organelle;extracellular region part;extracellular vesicular exosome;membrane-bounded organelle;membrane-bounded vesicle;organelle;vesicle	4	4	4	18.1	18.1	18.1	35.877	0	8.2488	127760000	11	24.0651	24.0512	24.0623	24.5162	24.3807	24.5953
+	2.63399	-0.54423	P23927	P23927	Alpha-crystallin B chain	Cryab	Color2 [DarkGray]	1	4	actin filament bundle;cell part;cell surface;contractile fiber;contractile fiber part;cytoplasm;cytoplasmic part;cytoskeletal part;cytoskeleton;cytosol;extracellular membrane-bounded organelle;extracellular organelle;extracellular region part;extracellular vesicular exosome;Golgi apparatus;intracellular membrane-bounded organelle;intracellular non-membrane-bounded organelle;intracellular organell…	12	12	12	68.6	68.6	68.6	20.069	0	155.82	30512000000	267	31.8436	31.9883	31.7947	32.4769	32.4694	32.313
+	1.58416	0.860723	P23953	P23953	Carboxylesterase 1C	Ces1c	Color2 [DarkGray]	1	4	cell part;cytoplasmic part;endoplasmic reticulum lumen;endoplasmic reticulum part;extracellular region part;extracellular space;intracellular organelle lumen;intracellular organelle part;intracellular part;membrane-enclosed lumen;organelle lumen;organelle part	19	19	16	39.9	39.9	35.7	61.055	0	124.41	4781500000	128	29.9121	29.6605	30.2339	28.7038	29.2301	29.2904
+	1.65708	-0.819261	P24270	P24270	Catalase	Cat	Color2 [DarkGray]	1	4	adherens junction;anchoring junction;cell junction;cell part;cell-substrate adherens junction;cell-substrate junction;cytoplasmic part;cytosol;endoplasmic reticulum;extracellular membrane-bounded organelle;extracellular organelle;extracellular region part;extracellular vesicular exosome;focal adhesion;Golgi apparatus;intracellular membrane-bounded organelle;intracellular organelle;intracellular o…	18	18	18	47.6	47.6	47.6	59.795	0	75.415	1961700000	75	27.9221	27.9154	27.4332	28.8869	28.3859	28.4556
+	2.6741	0.9809	P24472;P13745	P24472	Glutathione S-transferase A4	Gsta4	Color2 [DarkGray]	1	4	cell part;cytoplasm;intracellular part	6	6	5	24.8	24.8	21.2	25.564	0	18.557	489750000	25	26.5951	26.733	26.8512	25.542	25.7455	25.949
+	1.37943	-0.571416	P24547	P24547	Inosine-5-monophosphate dehydrogenase 2	Impdh2	Color2 [DarkGray]	1	4	cell part;cytoplasm;cytoplasmic part;extracellular membrane-bounded organelle;extracellular organelle;extracellular region part;extracellular vesicular exosome;intracellular membrane-bounded organelle;intracellular organelle;intracellular organelle part;intracellular part;membrane;membrane-bounded organelle;membrane-bounded vesicle;microbody;microbody membrane;microbody part;nucleus;organelle;org…	5	5	5	13.8	13.8	13.8	55.814	0	9.9244	155110000	13	24.0229	24.1279	24.5478	24.6168	24.9911	24.8049
+	3.10378	1.05194	P26040	P26040	Ezrin	Ezr	Color2 [DarkGray]	1	4	actin cytoskeleton;actin filament;adherens junction;anchoring junction;apical part of cell;apical plasma membrane;basolateral plasma membrane;brush border;cell body;cell cortex;cell junction;cell part;cell periphery;cell pole;cell projection;cell projection membrane;cell projection part;cell tip;cell-substrate adherens junction;cell-substrate junction;cytoplasmic part;cytoskeletal part;cytoskelet…	16	5	5	21.5	9.2	9.2	69.406	0	20.189	303240000	20	26.1699	26.0373	25.9902	24.8243	25.1712	25.0461
+	1.93321	-0.915431	P26883	P26883	Peptidyl-prolyl cis-trans isomerase FKBP1A	Fkbp1a	Color2 [DarkGray]	1	4	axon part;axon terminus;cell part;cell projection part;contractile fiber part;cytoplasm;cytoplasmic part;cytosol;endoplasmic reticulum membrane;endoplasmic reticulum part;extracellular membrane-bounded organelle;extracellular organelle;extracellular region part;extracellular vesicular exosome;intracellular organelle part;intracellular part;membrane;membrane part;membrane-bounded organelle;membran…	5	5	5	41.7	41.7	41.7	11.922	0	67.761	1649500000	41	27.5851	27.6994	27.048	28.409	28.2521	28.4178
+	3.3743	-1.25172	P27659	P27659	60S ribosomal protein L3	Rpl3	Color2 [DarkGray]	1	4	adherens junction;anchoring junction;cell junction;cell part;cell-substrate adherens junction;cell-substrate junction;cytoplasm;cytosolic large ribosomal subunit;extracellular membrane-bounded organelle;extracellular organelle;extracellular region part;extracellular vesicular exosome;focal adhesion;intracellular membrane-bounded organelle;intracellular non-membrane-bounded organelle;intracellular…	16	16	16	38.7	38.7	38.7	46.109	0	88.8	3293000000	78	28.3144	28.0272	28.2412	29.4101	29.3323	29.5955
+	3.98568	1.26249	P28650;P46664	P28650	Adenylosuccinate synthetase isozyme 1	Adssl1	Color2 [DarkGray]	1	4	cell part;cytoplasm;cytoplasmic part;cytosol;extracellular membrane-bounded organelle;extracellular organelle;extracellular region part;extracellular vesicular exosome;intracellular part;membrane;membrane-bounded organelle;membrane-bounded vesicle;organelle;plasma membrane;vesicle	16	16	16	47	47	47	50.254	0	60.916	1848400000	70	28.7771	28.597	28.837	27.4143	27.5471	27.4624
+	2.68841	-1.00003	P28653	P28653	Biglycan	Bgn	Color2 [DarkGray]	1	4	cell part;cell surface;cytoplasmic membrane-bounded vesicle;cytoplasmic part;cytoplasmic vesicle;extracellular matrix;extracellular membrane-bounded organelle;extracellular organelle;extracellular region part;extracellular vesicular exosome;intracellular;intracellular membrane-bounded organelle;intracellular organelle;intracellular part;membrane;membrane-bounded organelle;membrane-bounded vesicle…	13	12	12	41.5	39.3	39.3	41.639	0	101.05	3005100000	82	28.1898	28.0851	28.4494	29.1554	29.4199	29.1491
+	0.952856	-2.51478	P28656	P28656	Nucleosome assembly protein 1-like 1	Nap1l1	Color2 [DarkGray]	1	4	cell part;cytoplasmic membrane-bounded vesicle;cytoplasmic part;cytoplasmic vesicle;intracellular membrane-bounded organelle;intracellular organelle;intracellular part;melanosome;membrane;membrane-bounded organelle;membrane-bounded vesicle;nucleus;organelle;pigment granule;vesicle	6	5	5	18.4	15.9	15.9	45.345	0	13.293	348250000	9	25.8193	22.711	21.7913	25.6967	25.8167	26.3525
+	0.959852	1.27127	P28665;P28666	P28665	Murinoglobulin-1	Mug1	Color2 [DarkGray]	1	4	extracellular region part;extracellular space	19	19	19	18.2	18.2	18.2	165.3	0	70.748	1050500000	62	27.3767	27.7061	28.4281	25.5744	26.7042	27.4184
+	2.83867	-4.78971	P29268	P29268	Connective tissue growth factor	Ctgf	Color2 [DarkGray]	1	4	cell cortex;cell part;cis-Golgi network;cytoplasmic part;cytosol;extracellular matrix;extracellular region;extracellular region part;extracellular space;Golgi apparatus;Golgi apparatus part;intracellular membrane-bounded organelle;intracellular organelle;intracellular organelle part;intracellular part;membrane-bounded organelle;organelle;organelle part;perinuclear region of cytoplasm;proteinaceou…	6	6	6	24.1	24.1	24.1	37.824	0	14.356	495600000	16	22.9631	22.9315	21.1774	26.9288	27.475	27.0374
+	1.22154	-0.77645	P29391;P49945	P29391;P49945	Ferritin light chain 1;Ferritin light chain 2	Ftl1;Ftl2	Color2 [DarkGray]	1	4	cell part;cytoplasmic membrane-bounded vesicle lumen;cytoplasmic part;cytoplasmic vesicle part;endocytic vesicle lumen;extracellular region;ferritin complex;intracellular ferritin complex;intracellular organelle part;intracellular part;macromolecular complex;membrane-enclosed lumen;organelle lumen;organelle part;protein complex;vesicle lumen	7	7	7	53.6	53.6	53.6	20.802	0	35.03	339990000	29	25.3611	25.3953	24.8224	25.6138	26.4107	25.8836
+	1.80094	-2.41165	P29595	P29595	NEDD8	Nedd8	Color2 [DarkGray]	1	4	cell part;extracellular membrane-bounded organelle;extracellular organelle;extracellular region part;extracellular vesicular exosome;intracellular membrane-bounded organelle;intracellular organelle;intracellular part;membrane-bounded organelle;membrane-bounded vesicle;nucleus;organelle;vesicle	2	2	2	17.3	17.3	17.3	8.9723	0	9.1174	137180000	4	23.7741	21.8236	22.9072	24.9386	25.6275	25.1738
+	2.23463	0.827308	P29758	P29758	Ornithine aminotransferase, mitochondrial	Oat	Color2 [DarkGray]	1	4	cell part;cytoplasmic part;intracellular membrane-bounded organelle;intracellular organelle;intracellular organelle lumen;intracellular organelle part;intracellular part;membrane-bounded organelle;membrane-enclosed lumen;mitochondrial matrix;mitochondrial part;mitochondrion;organelle;organelle lumen;organelle part	18	18	18	56.5	56.5	56.5	48.354	0	138.24	2987200000	137	29.1996	29.1349	29.4644	28.2543	28.4076	28.655
+	2.73335	-0.789836	P31001;P46660;P08553;P19246	P31001	Desmin	Des	Color2 [DarkGray]	1	4	adherens junction;anchoring junction;axon;axon part;cell junction;cell part;cell projection;cell projection part;cell-cell adherens junction;cell-cell junction;contractile fiber;contractile fiber part;cytoplasm;cytoplasmic part;cytoskeletal part;cytoskeleton;extracellular membrane-bounded organelle;extracellular organelle;extracellular region part;extracellular space;extracellular vesicular exoso…	42	37	37	75.7	70.1	70.1	53.497	0	323.31	132830000000	671	33.745	33.8557	33.892	34.7875	34.6278	34.447
+	1.56915	0.822963	P31786	P31786	Acyl-CoA-binding protein	Dbi	Color2 [DarkGray]	1	4	cell part;clathrin-coated vesicle;coated vesicle;cytoplasmic membrane-bounded vesicle;cytoplasmic part;cytoplasmic vesicle;endoplasmic reticulum part;extracellular membrane-bounded organelle;extracellular organelle;extracellular region part;extracellular space;extracellular vesicular exosome;Golgi apparatus;intracellular membrane-bounded organelle;intracellular organelle;intracellular organelle p…	5	5	5	75.9	75.9	75.9	10	0	87.434	2353900000	61	29.1424	28.7888	28.7078	27.9193	27.7983	28.4524
+	1.03049	0.838775	P33622	P33622	Apolipoprotein C-III	Apoc3	Color2 [DarkGray]	1	4	cell part;chylomicron;cytoplasmic part;cytosol;extracellular membrane-bounded organelle;extracellular organelle;extracellular region;extracellular region part;extracellular vesicular exosome;high-density lipoprotein particle;intermediate-density lipoprotein particle;intracellular part;macromolecular complex;membrane-bounded organelle;membrane-bounded vesicle;organelle;plasma lipoprotein particle;…	2	2	2	27.3	27.3	27.3	10.982	0	7.2424	163030000	16	25.0065	24.7007	25.3909	23.7399	24.0161	24.8259
+	1.51319	-1.03399	P34884	P34884	Macrophage migration inhibitory factor	Mif	Color2 [DarkGray]	1	4	cell part;cell surface;cytoplasm;extracellular membrane-bounded organelle;extracellular organelle;extracellular region;extracellular region part;extracellular space;extracellular vesicular exosome;intracellular organelle part;intracellular part;membrane-bounded organelle;membrane-bounded vesicle;myelin sheath;nuclear part;nucleoplasm;organelle;organelle part;vesicle	5	5	5	71.3	71.3	71.3	12.504	0	105.26	6024800000	58	29.1604	28.8478	29.5756	30.6075	30.2804	29.7978
+	2.80397	0.769941	P34914	P34914	Bifunctional epoxide hydrolase 2;Cytosolic epoxide hydrolase 2;Lipid-phosphate phosphatase	Ephx2	Color2 [DarkGray]	1	4	cell part;cytoplasm;cytoplasmic part;cytosol;extracellular membrane-bounded organelle;extracellular organelle;extracellular region part;extracellular vesicular exosome;intracellular membrane-bounded organelle;intracellular organelle;intracellular part;membrane-bounded organelle;membrane-bounded vesicle;microbody;organelle;peroxisome;vesicle	25	25	25	57.4	57.4	57.4	62.515	0	323.31	7119600000	244	30.4398	30.4914	30.5319	29.5665	29.688	29.8988
+	0.80524	1.80585	P34928	P34928	Apolipoprotein C-I;Truncated apolipoprotein C-I	Apoc1	Color2 [DarkGray]	1	4	cell part;cytoplasmic part;endoplasmic reticulum;extracellular membrane-bounded organelle;extracellular organelle;extracellular region part;extracellular vesicular exosome;high-density lipoprotein particle;intracellular membrane-bounded organelle;intracellular organelle;intracellular part;macromolecular complex;membrane-bounded organelle;membrane-bounded vesicle;organelle;plasma lipoprotein parti…	2	2	2	20.5	20.5	20.5	9.6963	0	2.8634	150250000	9	25.4692	24.7831	25.1637	23.5639	21.4657	24.9689
+	1.21086	0.72873	P35283	P35283	Ras-related protein Rab-12	Rab12	Color2 [DarkGray]	1	4	autophagic vacuole;cell part;cytoplasmic membrane-bounded vesicle;cytoplasmic part;cytoplasmic vesicle;endosomal part;endosome membrane;Golgi apparatus;Golgi apparatus part;Golgi membrane;intracellular membrane-bounded organelle;intracellular organelle;intracellular organelle part;intracellular part;lysosomal membrane;lysosome;lytic vacuole;membrane;membrane-bounded organelle;membrane-bounded ves…	2	2	2	9.5	9.5	9.5	27.328	0	6.2986	92525000	7	23.9889	24.23	24.8638	23.6976	23.7799	23.419
+	1.72535	0.477849	P35330	P35330	Intercellular adhesion molecule 2	Icam2	Color2 [DarkGray]	1	4	cell part;cell periphery;cell projection;extracellular membrane-bounded organelle;extracellular organelle;extracellular region part;extracellular vesicular exosome;integral to membrane;integral to plasma membrane;intrinsic to membrane;intrinsic to plasma membrane;membrane;membrane part;membrane-bounded organelle;membrane-bounded vesicle;organelle;plasma membrane;plasma membrane part;uropod;vesicle	4	4	4	14.8	14.8	14.8	31.39	0	7.7248	116260000	13	24.6442	24.3058	24.3556	24.0909	23.9061	23.875
+	3.58577	-0.749029	P35385	P35385	Heat shock protein beta-7	Hspb7	Color2 [DarkGray]	1	4	actin cytoskeleton;Cajal body;cell part;cytoplasm;cytoplasmic part;cytoskeleton;intracellular membrane-bounded organelle;intracellular non-membrane-bounded organelle;intracellular organelle;intracellular organelle part;intracellular part;membrane-bounded organelle;mitochondrion;non-membrane-bounded organelle;nuclear body;nuclear part;nucleoplasm part;nucleus;organelle;organelle part	9	9	9	68	68	68	18.634	0	104.41	2624800000	72	28.1615	28.1701	28.2984	28.9821	28.8765	29.0185
+	2.96164	0.627057	P35486	P35486	Pyruvate dehydrogenase E1 component subunit alpha, somatic form, mitochondrial	Pdha1	Color2 [DarkGray]	1	4	cell part;cytoplasmic part;intracellular membrane-bounded organelle;intracellular organelle;intracellular organelle lumen;intracellular organelle part;intracellular part;macromolecular complex;membrane-bounded organelle;membrane-enclosed lumen;mitochondrial matrix;mitochondrial part;mitochondrion;myelin sheath;nucleus;organelle;organelle lumen;organelle part;protein complex;pyruvate dehydrogenase…	28	28	28	69.7	69.7	69.7	43.231	0	323.31	50856000000	488	33.1269	33.2565	33.3105	32.5951	32.5211	32.6965
+	2.26296	-0.836277	P35550	P35550	rRNA 2-O-methyltransferase fibrillarin	Fbl	Color2 [DarkGray]	1	4	box C/D snoRNP complex;Cajal body;cell part;extracellular membrane-bounded organelle;extracellular organelle;extracellular region part;extracellular vesicular exosome;granular component;intracellular membrane-bounded organelle;intracellular non-membrane-bounded organelle;intracellular organelle;intracellular organelle part;intracellular part;macromolecular complex;membrane;membrane-bounded organe…	7	7	6	28.1	28.1	23.9	34.306	0	22.891	558750000	22	25.9434	25.656	26.1741	26.7384	26.8224	26.7216
+	2.57116	-0.916474	P35585;Q9WVP1	P35585	AP-1 complex subunit mu-1	Ap1m1	Color2 [DarkGray]	1	4	AP-type membrane coat adaptor complex;cell part;clathrin adaptor complex;clathrin coated vesicle membrane;coated vesicle membrane;cytoplasmic part;cytoplasmic vesicle membrane;cytoplasmic vesicle part;extracellular membrane-bounded organelle;extracellular organelle;extracellular region part;extracellular vesicular exosome;Golgi apparatus part;intracellular membrane-bounded organelle;intracellular…	6	6	6	19.1	19.1	19.1	48.542	0	16.4	152040000	14	24.0327	24.0049	23.8966	25.0383	25.0141	24.6312
+	2.44503	0.486864	P35700	P35700	Peroxiredoxin-1	Prdx1	Color2 [DarkGray]	1	4	cell part;chromatin;chromosomal part;cytoplasm;cytoplasmic membrane-bounded vesicle;cytoplasmic part;cytoplasmic vesicle;cytosol;euchromatin;extracellular membrane-bounded organelle;extracellular organelle;extracellular region part;extracellular space;extracellular vesicular exosome;intracellular membrane-bounded organelle;intracellular non-membrane-bounded organelle;intracellular organelle;intra…	14	14	13	68.3	68.3	64.3	22.176	0	147.3	10618000000	199	30.9539	30.9211	30.9484	30.3013	30.5634	30.4981
+	1.76672	-0.549639	P35980	P35980	60S ribosomal protein L18	Rpl18	Color2 [DarkGray]	1	4	adherens junction;anchoring junction;cell junction;cell part;cell-substrate adherens junction;cell-substrate junction;cytoplasm;cytosolic large ribosomal subunit;focal adhesion;intracellular membrane-bounded organelle;intracellular non-membrane-bounded organelle;intracellular organelle;intracellular organelle part;intracellular part;large ribosomal subunit;macromolecular complex;membrane;membrane…	8	8	8	41.5	41.5	41.5	21.644	0	65.608	2938100000	51	28.7378	28.4109	28.3907	28.9023	29.1051	29.1809
+	2.23757	0.54806	P36552	P36552	Oxygen-dependent coproporphyrinogen-III oxidase, mitochondrial	Cpox	Color2 [DarkGray]	1	4	cell part;cytoplasm;cytoplasmic part;intracellular membrane-bounded organelle;intracellular organelle;intracellular organelle part;intracellular part;membrane;membrane-bounded organelle;membrane-enclosed lumen;mitochondrial inner membrane;mitochondrial intermembrane space;mitochondrial membrane;mitochondrial part;mitochondrion;organelle;organelle envelope lumen;organelle inner membrane;organelle …	10	10	10	27.1	27.1	27.1	49.714	0	20.005	465600000	40	26.4364	26.3421	26.6231	25.8789	26.0369	25.8417
+	3.52923	-5.22164	P37889	P37889	Fibulin-2	Fbln2	Color2 [DarkGray]	1	4	extracellular matrix;extracellular membrane-bounded organelle;extracellular organelle;extracellular region part;extracellular vesicular exosome;membrane-bounded organelle;membrane-bounded vesicle;organelle;proteinaceous extracellular matrix;vesicle	11	11	11	10.9	10.9	10.9	131.83	0	31.069	449680000	29	22.5285	21.5763	21.1755	26.8688	27.347	26.7295
+	1.80697	-0.700897	P39061	P39061	Collagen alpha-1(XVIII) chain;Endostatin	Col18a1	Color2 [DarkGray]	1	4	basement membrane;collagen;extracellular matrix;extracellular matrix part;extracellular membrane-bounded organelle;extracellular organelle;extracellular region part;extracellular space;extracellular vesicular exosome;membrane-bounded organelle;membrane-bounded vesicle;organelle;vesicle	7	7	7	5.1	5.1	5.1	182.17	0	20.707	288680000	17	24.9887	25.0642	25.0752	26.0346	25.7547	25.4415
+	1.74732	-0.805712	P41105	P41105	60S ribosomal protein L28	Rpl28	Color2 [DarkGray]	1	4	cell body;cell part;cell projection;cytoplasm;cytosolic large ribosomal subunit;dendrite;extracellular membrane-bounded organelle;extracellular organelle;extracellular region part;extracellular vesicular exosome;intracellular organelle part;intracellular part;large ribosomal subunit;macromolecular complex;membrane;membrane-bounded organelle;membrane-bounded vesicle;neuron projection;organelle;org…	7	7	7	45.3	45.3	45.3	15.733	0	26.913	1307300000	39	27.4023	27.4139	26.7873	27.9808	28.0442	27.9957
+	3.4757	0.748707	P41216;Q8JZR0	P41216	Long-chain-fatty-acid--CoA ligase 1	Acsl1	Color2 [DarkGray]	1	4	cell part;cytoplasmic part;endoplasmic reticulum;endoplasmic reticulum membrane;endoplasmic reticulum part;integral to membrane;intracellular membrane-bounded organelle;intracellular non-membrane-bounded organelle;intracellular organelle;intracellular organelle part;intracellular part;intrinsic to membrane;membrane;membrane part;membrane-bounded organelle;microbody;microbody membrane;microbody pa…	43	43	43	60.4	60.4	60.4	77.951	0	323.31	54504000000	680	33.3295	33.396	33.4685	32.5885	32.6071	32.7523
+	1.68979	-0.511453	P42208	P42208	Septin-2	2002-09-01	Color2 [DarkGray]	1	4	actin cytoskeleton;actomyosin contractile ring;cell cortex;cell cortex part;cell division site part;cell part;cell projection;cell projection membrane;cell projection part;cell surface;chromosomal part;ciliary transition zone;cilium membrane;cilium part;cleavage furrow;condensed chromosome kinetochore;contractile ring;cytoplasm;cytoplasmic part;cytoskeletal part;cytoskeleton;exocyst;extracellular…	8	8	8	37.4	37.4	37.4	41.525	0	120.02	1270600000	42	27.1626	27.2552	27.5727	27.8984	27.9024	27.7242
+	1.66767	1.28823	P42232;P42230	P42232;P42230	Signal transducer and activator of transcription 5B;Signal transducer and activator of transcription 5A	Stat5b;Stat5a	Color2 [DarkGray]	1	4	cell part;cytoplasm;cytoplasmic part;cytosol;intracellular membrane-bounded organelle;intracellular organelle;intracellular organelle part;intracellular part;membrane-bounded organelle;nuclear part;nucleoplasm;nucleus;organelle;organelle part	4	4	4	6	6	6	90.001	0	9.5745	134830000	9	25.0879	24.9049	24.9522	23.0505	23.7877	24.2422
+	2.77075	-0.760635	P42932	P42932	T-complex protein 1 subunit theta	Cct8	Color2 [DarkGray]	1	4	aggresome;cell body;cell part;centrosome;chaperonin-containing T-complex;cytoplasm;cytoplasmic part;cytoskeletal part;cytoskeleton;cytosol;cytosolic part;extracellular membrane-bounded organelle;extracellular organelle;extracellular region part;extracellular vesicular exosome;inclusion body;intermediate filament cytoskeleton;intracellular non-membrane-bounded organelle;intracellular organelle;int…	28	28	28	58.4	58.4	58.4	59.555	0	118.91	3982000000	138	28.8351	28.6816	28.9293	29.6071	29.681	29.4398
+	1.85091	-2.85093	P43277	P43277	Histone H1.3	Hist1h1d	Color2 [DarkGray]	1	4	cell part;chromatin;chromosomal part;euchromatin;intracellular organelle part;intracellular part;macromolecular complex;nuclear chromatin;nuclear chromosome part;nuclear euchromatin;nuclear part;nucleosome;organelle part;protein-DNA complex	10	2	2	33.5	9.5	9.5	22.099	0	7.6114	183630000	13	23.5474	21.3003	21.7865	24.9806	25.0465	25.1599
+	2.15907	0.68348	P45377	P45377	Aldose reductase-related protein 2	Akr1b8	Color2 [DarkGray]	1	4	cell part;cytoplasm;extracellular membrane-bounded organelle;extracellular organelle;extracellular region part;extracellular vesicular exosome;intracellular part;membrane-bounded organelle;membrane-bounded vesicle;organelle;vesicle	4	2	2	19	13.9	13.9	36.12	0	9.6924	305080000	20	26.0062	25.9027	25.7902	25.0352	25.4387	25.1747
+	2.50909	-0.4816	P45591	P45591	Cofilin-2	Cfl2	Color2 [DarkGray]	1	4	actin cytoskeleton;cell part;contractile fiber part;cytoplasmic part;cytoskeleton;extracellular membrane-bounded organelle;extracellular organelle;extracellular region part;extracellular space;extracellular vesicular exosome;I band;intracellular non-membrane-bounded organelle;intracellular organelle;intracellular organelle part;intracellular part;membrane-bounded organelle;membrane-bounded vesicl…	13	11	11	75.9	65.1	65.1	18.709	0	138.66	5161600000	79	29.2535	29.3611	29.51	29.882	29.8452	29.8422
+	3.00004	0.858519	P45952	P45952	Medium-chain specific acyl-CoA dehydrogenase, mitochondrial	Acadm	Color2 [DarkGray]	1	4	axon;cell part;cell projection;cytoplasmic part;extracellular membrane-bounded organelle;extracellular organelle;extracellular region part;extracellular vesicular exosome;intracellular membrane-bounded organelle;intracellular organelle;intracellular organelle lumen;intracellular organelle part;intracellular part;membrane-bounded organelle;membrane-bounded vesicle;membrane-enclosed lumen;mitochond…	26	26	26	59.9	59.9	59.9	46.481	0	323.31	50165000000	420	33.3368	33.275	33.322	32.2577	32.5343	32.5663
+	3.71823	-0.563843	P46471	P46471	26S protease regulatory subunit 7	Psmc2	Color2 [DarkGray]	1	4	cell part;cytoplasm;cytoplasmic mRNA processing body;cytoplasmic part;cytosolic part;cytosolic proteasome complex;intracellular membrane-bounded organelle;intracellular non-membrane-bounded organelle;intracellular organelle;intracellular organelle part;intracellular part;macromolecular complex;membrane;membrane-bounded organelle;non-membrane-bounded organelle;nuclear part;nuclear proteasome compl…	19	19	19	47.8	47.8	47.8	48.647	0	72.659	1087900000	80	27.1224	27.0448	26.9791	27.6337	27.6055	27.5986
+	1.41805	0.892303	P47199	P47199	Quinone oxidoreductase	Cryz	Color2 [DarkGray]	1	4	cell part;cytoplasm;cytoplasmic part;cytosol;extracellular membrane-bounded organelle;extracellular organelle;extracellular region part;extracellular vesicular exosome;Golgi apparatus;intracellular membrane-bounded organelle;intracellular organelle;intracellular part;membrane-bounded organelle;membrane-bounded vesicle;organelle;vesicle	8	8	8	38.1	38.1	38.1	35.268	0	29.353	456370000	38	26.7141	26.3806	26.6153	25.1634	26.1075	25.7621
+	2.93246	0.742174	P47738	P47738	Aldehyde dehydrogenase, mitochondrial	Aldh2	Color2 [DarkGray]	1	4	cell part;cytoplasmic part;extracellular membrane-bounded organelle;extracellular organelle;extracellular region part;extracellular vesicular exosome;intracellular membrane-bounded organelle;intracellular organelle;intracellular organelle lumen;intracellular organelle part;intracellular part;membrane-bounded organelle;membrane-bounded vesicle;membrane-enclosed lumen;mitochondrial matrix;mitochond…	20	18	17	48.9	47.4	45.9	56.537	0	146.31	6623300000	179	30.331	30.2186	30.3617	29.4275	29.5578	29.6994
+	2.76563	0.672506	P47754	P47754	F-actin-capping protein subunit alpha-2	Capza2	Color2 [DarkGray]	1	4	brush border;cell cortex part;cell part;cell projection;cortical cytoskeleton;cytoplasmic part;cytoskeletal part;cytoskeleton;extracellular membrane-bounded organelle;extracellular organelle;extracellular region part;extracellular vesicular exosome;F-actin capping protein complex;intracellular non-membrane-bounded organelle;intracellular organelle;intracellular organelle part;intracellular part;m…	15	15	13	70.3	70.3	60.8	32.967	0	194.63	3760700000	102	29.447	29.5381	29.6022	28.7114	28.9783	28.8801
+	2.84558	0.925897	P47857	P47857	ATP-dependent 6-phosphofructokinase, muscle type	Pfkm	Color2 [DarkGray]	1	4	6-phosphofructokinase complex;apical plasma membrane;cell part;cytoplasmic part;cytosol;cytosolic part;extracellular membrane-bounded organelle;extracellular organelle;extracellular region part;extracellular vesicular exosome;intracellular part;macromolecular complex;membrane part;membrane-bounded organelle;membrane-bounded vesicle;organelle;plasma membrane part;protein complex;vesicle	29	29	25	47.7	47.7	42.8	85.268	0	323.31	17412000000	333	31.7607	31.8634	31.8731	30.7289	30.8758	31.1148
+	2.29431	-0.56904	P47911	P47911	60S ribosomal protein L6	Rpl6	Color2 [DarkGray]	1	4	adherens junction;anchoring junction;cell junction;cell part;cell-substrate adherens junction;cell-substrate junction;cytoplasm;cytosolic large ribosomal subunit;focal adhesion;intracellular membrane-bounded organelle;intracellular non-membrane-bounded organelle;intracellular organelle;intracellular organelle part;intracellular part;large ribosomal subunit;macromolecular complex;membrane;membrane…	14	14	14	41.9	41.9	41.9	33.509	0	91.99	3379300000	78	28.8172	28.6306	28.7364	29.1776	29.4655	29.2482
+	2.33551	-0.809364	P47915	P47915	60S ribosomal protein L29	Rpl29	Color2 [DarkGray]	1	4	cell part;cytoplasmic part;intracellular non-membrane-bounded organelle;intracellular organelle;intracellular part;macromolecular complex;non-membrane-bounded organelle;organelle;ribonucleoprotein complex;ribosome	2	2	2	11.9	11.9	11.9	17.587	0.00039324	2.7837	798170000	10	26.4757	26.5509	26.3737	27.0262	27.3285	27.4737
+	3.13881	0.969671	P47934	P47934	Carnitine O-acetyltransferase	Crat	Color2 [DarkGray]	1	4	cell part;cytoplasmic part;endoplasmic reticulum;intracellular membrane-bounded organelle;intracellular organelle;intracellular organelle part;intracellular part;membrane;membrane-bounded organelle;microbody;mitochondrial inner membrane;mitochondrial membrane;mitochondrial part;mitochondrion;organelle;organelle inner membrane;organelle membrane;organelle part;peroxisome	22	22	22	36.1	36.1	36.1	70.839	0	182.39	8565100000	221	30.8736	30.8267	30.7777	29.6799	30.0256	29.8634
+	1.0265	1.4289	P48193	P48193	Protein 4.1	Epb41	Color2 [DarkGray]	1	4	actin cytoskeleton;cell cortex part;cell part;cortical cytoskeleton;cytoplasmic part;cytoskeleton;extrinsic to membrane;Golgi apparatus;intracellular membrane-bounded organelle;intracellular non-membrane-bounded organelle;intracellular organelle;intracellular part;macromolecular complex;membrane;membrane part;membrane-bounded organelle;non-membrane-bounded organelle;nucleus;organelle;plasma membr…	7	7	7	8.9	8.9	8.9	95.91	0	10.384	147520000	11	25.408	25.0121	24.5995	23.5256	22.5472	24.66
+	1.64682	-1.23238	P48428	P48428	Tubulin-specific chaperone A	Tbca	Color2 [DarkGray]	1	4	cell part;cytoplasm;cytoskeletal part;cytoskeleton;extracellular membrane-bounded organelle;extracellular organelle;extracellular region part;extracellular vesicular exosome;intracellular non-membrane-bounded organelle;intracellular organelle;intracellular organelle part;intracellular part;macromolecular complex;membrane-bounded organelle;membrane-bounded vesicle;microtubule;microtubule cytoskele…	2	2	2	15.7	15.7	15.7	12.758	0.00039432	2.8072	126940000	7	24.0741	22.9561	23.8339	24.792	24.9039	24.8653
+	2.48765	-0.614921	P48678	P48678	Prelamin-A/C;Lamin-A/C	Lmna	Color2 [DarkGray]	1	4	cell part;cytoplasm;cytoplasmic part;cytoskeletal part;envelope;intermediate filament;intracellular membrane-bounded organelle;intracellular organelle;intracellular organelle part;intracellular part;lamin filament;macromolecular complex;membrane;membrane-bounded organelle;nuclear envelope;nuclear membrane;nuclear part;nucleoplasm;nucleus;organelle;organelle envelope;organelle membrane;organelle p…	44	44	42	63.8	63.8	62.4	74.237	0	323.31	13115000000	300	30.5676	30.6035	30.713	31.4066	31.214	31.1082
+	2.01072	0.511502	P48722	P48722	Heat shock 70 kDa protein 4L	Hspa4l	Color2 [DarkGray]	1	4	cell part;cytoplasm;cytoplasmic part;cytosol;intracellular membrane-bounded organelle;intracellular organelle;intracellular part;membrane-bounded organelle;nucleus;organelle	9	7	7	14.8	11.2	11.2	94.381	0	21.331	252090000	18	25.5522	25.5442	25.5568	25.1156	25.1808	24.8223
+	1.58771	0.691426	P48758;Q8K354	P48758	Carbonyl reductase [NADPH] 1	Cbr1	Color2 [DarkGray]	1	4	cell part;cytoplasm;cytoplasmic part;cytosol;extracellular membrane-bounded organelle;extracellular organelle;extracellular region part;extracellular space;extracellular vesicular exosome;intracellular organelle part;intracellular part;membrane-bounded organelle;membrane-bounded vesicle;nuclear part;nucleoplasm;organelle;organelle part;vesicle	14	14	14	69.3	69.3	69.3	30.641	0	100.24	1188200000	54	27.9384	27.8243	27.8463	26.7874	27.333	27.4143
+	2.48772	-0.473851	P48771	P48771	Cytochrome c oxidase subunit 7A2, mitochondrial	Cox7a2	Color2 [DarkGray]	1	4	cell part;cytoplasmic part;extracellular membrane-bounded organelle;extracellular organelle;extracellular region part;extracellular vesicular exosome;intracellular membrane-bounded organelle;intracellular organelle;intracellular organelle part;intracellular part;membrane;membrane part;membrane-bounded organelle;membrane-bounded vesicle;mitochondrial inner membrane;mitochondrial membrane;mitochond…	2	2	2	27.7	27.7	27.7	9.2908	0	24.242	8208200000	53	30.0855	30.0276	29.9188	30.5953	30.4541	30.4041
+	2.33292	0.676053	P48787	P48787	Troponin I, cardiac muscle	Tnni3	Color2 [DarkGray]	1	4	cell part;contractile fiber part;cytoplasm;cytoplasmic part;cytoskeletal part;intracellular organelle part;intracellular part;macromolecular complex;organelle part;protein complex;sarcomere;troponin complex	16	16	16	69.7	69.7	69.7	24.258	0	275.68	89108000000	303	33.8594	34.0797	34.1435	33.335	33.2197	33.4998
+	1.93882	0.503713	P48962	P48962	ADP/ATP translocase 1	Slc25a4	Color2 [DarkGray]	1	4	cell part;cytoplasmic part;integral to membrane;intracellular membrane-bounded organelle;intracellular organelle;intracellular organelle part;intracellular part;intrinsic to membrane;membrane;membrane part;membrane-bounded organelle;mitochondrial inner membrane;mitochondrial membrane;mitochondrial outer membrane;mitochondrial part;mitochondrion;myelin sheath;nucleus;organelle;organelle inner memb…	28	28	15	72.1	72.1	31.9	32.904	0	323.31	457320000000	946	36.2085	36.4108	36.4017	35.8818	35.6579	35.9702
+	1.52912	1.21023	P49586;Q811Q9	P49586	Choline-phosphate cytidylyltransferase A	Pcyt1a	Color2 [DarkGray]	1	4	cell part;cytoplasmic part;cytosol;endoplasmic reticulum;endoplasmic reticulum membrane;endoplasmic reticulum part;glycogen granule;intracellular membrane-bounded organelle;intracellular organelle;intracellular organelle part;intracellular part;membrane;membrane part;membrane-bounded organelle;organelle;organelle membrane;organelle part	3	3	3	11.2	11.2	11.2	41.666	0	4.8057	53795000	4	23.9474	23.7566	24.1308	23.2349	22.9061	22.0631
+	2.42083	0.627673	P49813;Q9JLH8;Q9JKK7	P49813	Tropomodulin-1	Tmod1	Color2 [DarkGray]	1	4	cell cortex part;cell part;cell projection part;contractile fiber;contractile fiber part;cortical cytoskeleton;cytoplasmic part;cytoskeletal part;cytoskeleton;growth cone;intracellular non-membrane-bounded organelle;intracellular organelle;intracellular organelle part;intracellular part;macromolecular complex;membrane;myofibril;non-membrane-bounded organelle;nuclear part;organelle;organelle part;…	20	20	19	67.1	67.1	64.9	40.466	0	323.31	4593200000	158	29.6166	29.9224	29.8856	29.1052	29.2354	29.2009
+	1.84916	0.900646	P50136	P50136	2-oxoisovalerate dehydrogenase subunit alpha, mitochondrial	Bckdha	Color2 [DarkGray]	1	4	cell part;cytoplasmic part;dihydrolipoyl dehydrogenase complex;intracellular membrane-bounded organelle;intracellular organelle;intracellular organelle part;intracellular part;macromolecular complex;membrane-bounded organelle;mitochondrial alpha-ketoglutarate dehydrogenase complex;mitochondrial part;mitochondrial tricarboxylic acid cycle enzyme complex;mitochondrion;organelle;organelle part;prote…	12	12	12	34.6	34.6	34.6	50.37	0	43.827	736080000	34	27.2849	27.0922	27.4885	26.0341	26.6516	26.4779
+	2.04682	0.691554	P50171	P50171	Estradiol 17-beta-dehydrogenase 8	Hsd17b8	Color2 [DarkGray]	1	4	cell part;cytoplasmic part;envelope;intracellular membrane-bounded organelle;intracellular organelle;intracellular organelle lumen;intracellular organelle part;intracellular part;membrane;membrane-bounded organelle;membrane-enclosed lumen;mitochondrial envelope;mitochondrial matrix;mitochondrial part;mitochondrion;organelle;organelle envelope;organelle lumen;organelle part;plasma membrane	10	10	10	59.8	59.8	59.8	26.588	0	55.153	1689600000	53	28.3321	28.4624	28.2441	27.5202	27.9168	27.527
+	0.820365	-1.67177	P50431	P50431	Serine hydroxymethyltransferase, cytosolic	Shmt1	Color2 [DarkGray]	1	4	cell part;cytoplasm;cytoplasmic part;cytosol;extracellular membrane-bounded organelle;extracellular organelle;extracellular region part;extracellular vesicular exosome;intracellular membrane-bounded organelle;intracellular organelle;intracellular organelle part;intracellular part;membrane-bounded organelle;membrane-bounded vesicle;mitochondrion;nuclear part;nucleoplasm;nucleus;organelle;organelle…	3	3	3	8.8	8.8	8.8	52.6	0	11.243	231710000	8	25.1733	21.915	23.5094	25.1024	25.1543	25.3563
+	3.03259	-0.979125	P50462	P50462	Cysteine and glycine-rich protein 3	Csrp3	Color2 [DarkGray]	1	4	cell part;contractile fiber part;cytoplasm;cytoplasmic part;cytoskeleton;intracellular membrane-bounded organelle;intracellular non-membrane-bounded organelle;intracellular organelle;intracellular part;membrane-bounded organelle;non-membrane-bounded organelle;nucleus;organelle;organelle part;Z disc	13	13	13	68.6	68.6	68.6	20.895	0	323.31	30320000000	231	31.6925	31.6724	31.4158	32.6239	32.6545	32.4397
+	2.91202	0.788661	P50544	P50544	Very long-chain specific acyl-CoA dehydrogenase, mitochondrial	Acadvl	Color2 [DarkGray]	1	4	cell part;cytoplasm;cytoplasmic part;intracellular membrane-bounded organelle;intracellular non-membrane-bounded organelle;intracellular organelle;intracellular organelle part;intracellular part;membrane;membrane-bounded organelle;mitochondrial inner membrane;mitochondrial membrane;mitochondrial nucleoid;mitochondrial part;mitochondrion;non-membrane-bounded organelle;nuclear part;nucleoid;nucleol…	44	44	44	72.1	72.1	72.1	70.875	0	323.31	72053000000	785	33.7171	33.8421	33.8113	32.8604	32.9783	33.1659
+	4.87437	-1.3133	P50580	P50580	Proliferation-associated protein 2G4	Pa2g4	Color2 [DarkGray]	1	4	cell part;cytoplasm;extracellular membrane-bounded organelle;extracellular organelle;extracellular region part;extracellular vesicular exosome;intracellular membrane-bounded organelle;intracellular non-membrane-bounded organelle;intracellular organelle;intracellular organelle part;intracellular part;macromolecular complex;membrane;membrane-bounded organelle;membrane-bounded vesicle;non-membrane-b…	15	15	15	47.2	47.2	47.2	43.698	0	93.384	2004400000	93	27.409	27.4432	27.4701	28.8366	28.754	28.6715
+	2.43713	0.663567	P50752;O88346	P50752	Troponin T, cardiac muscle	Tnnt2	Color2 [DarkGray]	1	4	cell part;contractile fiber;contractile fiber part;cytoplasm;cytoplasmic part;cytoskeletal part;intracellular non-membrane-bounded organelle;intracellular organelle;intracellular organelle part;intracellular part;macromolecular complex;myofibril;non-membrane-bounded organelle;organelle;organelle part;protein complex;sarcomere;striated muscle thin filament;troponin complex	23	23	23	38.5	38.5	38.5	35.825	0	323.31	117910000000	633	34.416	34.5885	34.4098	33.7234	33.7091	33.991
+	2.06129	0.56772	P51174	P51174	Long-chain specific acyl-CoA dehydrogenase, mitochondrial	Acadl	Color2 [DarkGray]	1	4	cell part;cytoplasm;cytoplasmic part;intracellular membrane-bounded organelle;intracellular organelle;intracellular organelle lumen;intracellular organelle part;intracellular part;membrane;membrane-bounded organelle;membrane-enclosed lumen;mitochondrial matrix;mitochondrial membrane;mitochondrial part;mitochondrion;organelle;organelle lumen;organelle membrane;organelle part	22	22	22	45.3	45.3	45.3	47.907	0	323.31	95894000000	515	34.0697	34.0596	34.1154	33.4361	33.3612	33.7441
+	1.04979	-1.61353	P51807	P51807	Dynein light chain Tctex-type 1	Dynlt1	Color2 [DarkGray]	1	4	cell part;cytoplasmic dynein complex;cytoplasmic part;cytoskeletal part;dynein complex;Golgi apparatus;intracellular membrane-bounded organelle;intracellular non-membrane-bounded organelle;intracellular organelle;intracellular organelle part;intracellular part;macromolecular complex;membrane-bounded organelle;microtubule;microtubule associated complex;non-membrane-bounded organelle;organelle;orga…	2	2	2	35.4	35.4	35.4	12.483	0	14.402	97235000	9	23.5074	21.4444	23.6436	24.6936	24.4769	24.2655
+	2.81592	0.985662	P52196	P52196	Thiosulfate sulfurtransferase	Tst	Color2 [DarkGray]	1	4	cell part;cytoplasmic part;extracellular membrane-bounded organelle;extracellular organelle;extracellular region part;extracellular space;extracellular vesicular exosome;intracellular membrane-bounded organelle;intracellular organelle;intracellular organelle lumen;intracellular organelle part;intracellular part;membrane;membrane-bounded organelle;membrane-bounded vesicle;membrane-enclosed lumen;m…	10	10	10	35.7	35.7	35.7	33.466	0	25.775	331590000	37	26.2753	25.9632	26.2571	25.1419	25.3302	25.0666
+	1.31929	-1.29464	P52624	P52624	Uridine phosphorylase 1	Upp1	Color2 [DarkGray]	1	4	cell part;cytoplasm;intracellular part	2	2	2	9.3	9.3	9.3	34.086	0	4.3209	54317000	6	23.5308	22.1616	22.1607	23.9946	23.9252	23.8172
+	3.01688	0.79596	P52825	P52825	Carnitine O-palmitoyltransferase 2, mitochondrial	Cpt2	Color2 [DarkGray]	1	4	cell part;cytoplasmic part;intracellular membrane-bounded organelle;intracellular non-membrane-bounded organelle;intracellular organelle;intracellular organelle part;intracellular part;membrane;membrane-bounded organelle;mitochondrial inner membrane;mitochondrial membrane;mitochondrial part;mitochondrion;non-membrane-bounded organelle;nuclear part;nucleolus;nucleoplasm;organelle;organelle inner m…	32	32	32	61.2	61.2	61.2	73.98	0	323.31	12832000000	297	31.2686	31.3368	31.455	30.4522	30.5212	30.6991
+	1.71048	0.584859	P53395	P53395	Lipoamide acyltransferase component of branched-chain alpha-keto acid dehydrogenase complex, mitochondrial	Dbt	Color2 [DarkGray]	1	4	cell part;cytoplasmic part;intracellular membrane-bounded organelle;intracellular non-membrane-bounded organelle;intracellular organelle;intracellular organelle part;intracellular part;membrane-bounded organelle;mitochondrial nucleoid;mitochondrial part;mitochondrion;non-membrane-bounded organelle;nucleoid;organelle;organelle part	12	12	12	27.4	27.4	27.4	53.246	0	35.025	1607600000	62	28.309	28.2056	28.3065	27.6663	27.961	27.4393
+	2.026	-0.895945	P53996	P53996	Cellular nucleic acid-binding protein	Cnbp	Color2 [DarkGray]	1	4	cell part;cytoplasmic part;cytosol;endoplasmic reticulum;intracellular membrane-bounded organelle;intracellular organelle;intracellular part;membrane-bounded organelle;nucleus;organelle	4	4	4	28.1	28.1	28.1	19.592	0	17.817	584240000	14	26.1244	26.0065	25.7877	26.5433	27.0645	26.9987
+	2.40201	0.39217	P54071	P54071	Isocitrate dehydrogenase [NADP], mitochondrial	Idh2	Color2 [DarkGray]	1	4	cell part;cytoplasmic part;extracellular membrane-bounded organelle;extracellular organelle;extracellular region part;extracellular vesicular exosome;intracellular membrane-bounded organelle;intracellular organelle;intracellular organelle part;intracellular part;membrane;membrane-bounded organelle;membrane-bounded vesicle;mitochondrial inner membrane;mitochondrial membrane;mitochondrial part;mito…	34	34	33	61.7	61.7	61.7	50.906	0	323.31	143690000000	685	34.589	34.6461	34.6558	34.1168	34.2743	34.3234
+	2.34316	-0.663285	P54775	P54775	26S protease regulatory subunit 6B	Psmc4	Color2 [DarkGray]	1	4	cell part;cytoplasm;cytoplasmic part;cytosolic part;cytosolic proteasome complex;inclusion body;intracellular membrane-bounded organelle;intracellular organelle;intracellular organelle part;intracellular part;macromolecular complex;membrane;membrane-bounded organelle;nuclear part;nuclear proteasome complex;nucleoplasm;nucleus;organelle;organelle part;proteasome accessory complex;proteasome comple…	18	18	18	57.7	57.7	57.7	47.408	0	151.65	1906600000	76	27.5802	27.8625	27.9639	28.4445	28.4678	28.4841
+	1.4927	1.85121	P54797	P54797	Transport and Golgi organization 2 homolog	Tango2	Color2 [DarkGray]	1	4	cell part;cytoplasmic part;intracellular membrane-bounded organelle;intracellular organelle;intracellular part;membrane-bounded organelle;mitochondrion;organelle	4	4	4	18.8	18.8	18.8	30.947	0	9.2796	167140000	7	25.483	25.8531	25.0927	23.512	22.7679	24.5954
+	1.97567	-1.08579	P55302	P55302	Alpha-2-macroglobulin receptor-associated protein	Lrpap1	Color2 [DarkGray]	1	4	cell part;cell surface;cytoplasmic part;endoplasmic reticulum;endoplasmic reticulum lumen;endoplasmic reticulum part;extracellular region;intracellular membrane-bounded organelle;intracellular organelle;intracellular organelle lumen;intracellular organelle part;intracellular part;membrane;membrane-bounded organelle;membrane-enclosed lumen;organelle;organelle lumen;organelle part;plasma membrane;r…	6	6	6	15.8	15.8	15.8	42.215	0	13.308	288940000	11	24.6922	25.0686	24.663	25.5043	26.0023	26.1746
+	1.04849	-1.59418	P55937	P55937	Golgin subfamily A member 3	Golga3	Color2 [DarkGray]	1	4	cell part;cytoplasmic part;cytosol;endoplasmic reticulum-Golgi intermediate compartment;Golgi apparatus;Golgi apparatus part;Golgi cisterna membrane;Golgi membrane;Golgi transport complex;intracellular membrane-bounded organelle;intracellular non-membrane-bounded organelle;intracellular organelle;intracellular organelle part;intracellular part;macromolecular complex;membrane;membrane-bounded orga…	9	9	9	7.3	7.3	7.3	167.22	0	16.25	89140000	9	23.6898	21.466	23.3629	24.7744	24.3077	24.2191
+	1.8895	0.793331	P56135	P56135	ATP synthase subunit f, mitochondrial	Atp5j2	Color2 [DarkGray]	1	4	cell part;cytoplasmic part;extracellular membrane-bounded organelle;extracellular organelle;extracellular region part;extracellular vesicular exosome;integral to membrane;intracellular membrane-bounded organelle;intracellular organelle;intracellular organelle part;intracellular part;intrinsic to membrane;macromolecular complex;membrane;membrane part;membrane-bounded organelle;membrane-bounded ves…	4	4	4	36.4	36.4	36.4	10.344	0	25.454	22982000000	79	32.1477	32.0722	32.1315	31.1678	31.1128	31.6907
+	1.52572	0.538816	P56375	P56375	Acylphosphatase-2	Acyp2	Color2 [DarkGray]	1	4	cell part;cytoplasmic part;intracellular membrane-bounded organelle;intracellular organelle;intracellular part;membrane-bounded organelle;mitochondrion;organelle	4	4	4	42.5	42.5	42.5	11.877	0	31.26	436330000	18	26.5283	26.0949	26.5343	25.9942	25.7779	25.769
+	0.999699	5.1751	P56379	P56379	6.8 kDa mitochondrial proteolipid	Mp68	Color2 [DarkGray]	1	4	cell part;cytoplasmic part;integral to membrane;intracellular membrane-bounded organelle;intracellular organelle;intracellular organelle part;intracellular part;intrinsic to membrane;macromolecular complex;membrane part;membrane-bounded organelle;mitochondrial membrane part;mitochondrial part;mitochondrial proton-transporting ATP synthase complex;mitochondrion;organelle;organelle part;protein com…	2	2	2	29.3	29.3	29.3	6.6979	0	3.713	4882800000	31	30.1102	29.8791	29.4224	22.8102	21.6541	29.4222
+	3.70731	1.04767	P56392	P56392	Cytochrome c oxidase subunit 7A1, mitochondrial	Cox7a1	Color2 [DarkGray]	1	4	cell part;cytoplasmic part;integral to membrane;intracellular membrane-bounded organelle;intracellular organelle;intracellular organelle part;intracellular part;intrinsic to membrane;membrane part;membrane-bounded organelle;mitochondrial membrane part;mitochondrial part;mitochondrial respiratory chain;mitochondrion;organelle;organelle part;respiratory chain	2	2	2	28.8	28.8	28.8	8.9863	0	15.251	13514000000	55	31.6269	31.359	31.4412	30.4237	30.4115	30.4488
+	1.85772	-0.580922	P56395	P56395	Cytochrome b5	Cyb5a	Color2 [DarkGray]	1	4	cell part;cytoplasmic part;endoplasmic reticulum membrane;endoplasmic reticulum part;extracellular membrane-bounded organelle;extracellular organelle;extracellular region part;extracellular vesicular exosome;integral to membrane;intracellular membrane-bounded organelle;intracellular organelle;intracellular organelle part;intracellular part;intrinsic to membrane;membrane;membrane part;membrane-bou…	4	4	4	38.8	38.8	38.8	15.241	0	24.136	1064800000	41	27.154	26.822	27.1579	27.5166	27.5716	27.7885
+	2.35947	0.626989	P56480	P56480	ATP synthase subunit beta, mitochondrial	Atp5b	Color2 [DarkGray]	1	4	cell part;cell surface;cytoplasmic part;extracellular membrane-bounded organelle;extracellular organelle;extracellular region part;extracellular vesicular exosome;intracellular membrane-bounded organelle;intracellular non-membrane-bounded organelle;intracellular organelle;intracellular organelle part;intracellular part;macromolecular complex;membrane;membrane part;membrane-bounded organelle;membr…	31	31	31	76	76	76	56.3	0	323.31	641320000000	2059	36.7558	36.8249	36.9659	36.215	36.0722	36.3785
+	2.37453	1.41619	P56501	P56501	Mitochondrial uncoupling protein 3	Ucp3	Color2 [DarkGray]	1	4	cell part;cytoplasmic part;integral to membrane;intracellular membrane-bounded organelle;intracellular organelle;intracellular organelle part;intracellular part;intrinsic to membrane;membrane;membrane part;membrane-bounded organelle;mitochondrial inner membrane;mitochondrial membrane;mitochondrial part;mitochondrion;organelle;organelle inner membrane;organelle membrane;organelle part	3	3	3	14.3	14.3	14.3	33.91	0	12.603	161860000	10	25.2543	25.3925	25.5054	23.515	24.2674	24.1212
+	1.7074	-0.457864	P56812	P56812	Programmed cell death protein 5	Pdcd5	Color2 [DarkGray]	1	4	cell part;cytoplasm;extracellular membrane-bounded organelle;extracellular organelle;extracellular region part;extracellular vesicular exosome;intracellular membrane-bounded organelle;intracellular organelle;intracellular part;membrane-bounded organelle;membrane-bounded vesicle;nucleus;organelle;vesicle	5	5	5	36.5	36.5	36.5	14.275	0	20.377	355830000	16	25.5545	25.6312	25.3611	25.8002	26.0113	26.109
+	2.34609	-0.410416	P56959	P56959	RNA-binding protein FUS	Fus	Color2 [DarkGray]	1	4	cell part;cytoplasm;intracellular membrane-bounded organelle;intracellular organelle;intracellular organelle part;intracellular part;membrane-bounded organelle;nuclear part;nucleoplasm;nucleus;organelle;organelle part	6	6	6	11.4	11.4	11.4	52.673	0	16.237	337710000	30	25.6109	25.3888	25.4917	25.8765	25.9695	25.8768
+	2.14591	-1.06175	P57776	P57776	Elongation factor 1-delta	Eef1d	Color2 [DarkGray]	1	4	cell part;cytoplasm;cytoplasmic part;eukaryotic translation elongation factor 1 complex;intracellular membrane-bounded organelle;intracellular non-membrane-bounded organelle;intracellular organelle;intracellular organelle part;intracellular part;macromolecular complex;membrane-bounded organelle;non-membrane-bounded organelle;nuclear part;nucleolus;nucleus;organelle;organelle part;protein complex	9	9	9	51.6	51.6	51.6	31.293	0	219.53	4329100000	55	28.5157	28.562	29.1168	29.8611	29.8874	29.6312
+	3.04707	0.552184	P58281;P58682	P58281	Dynamin-like 120 kDa protein, mitochondrial;Dynamin-like 120 kDa protein, form S1	Opa1	Color2 [DarkGray]	1	4	cell part;cell projection;cytoplasm;cytoplasmic part;dendrite;integral to membrane;intracellular membrane-bounded organelle;intracellular organelle;intracellular organelle part;intracellular part;intrinsic to membrane;membrane;membrane part;membrane-bounded organelle;membrane-enclosed lumen;mitochondrial crista;mitochondrial inner membrane;mitochondrial intermembrane space;mitochondrial membrane;…	35	35	35	42	42	42	111.34	0	278.32	4318100000	204	29.6185	29.6937	29.7427	29.0396	29.1441	29.2146
+	2.07806	0.659772	P58771	P58771	Tropomyosin alpha-1 chain	Tpm1	Color2 [DarkGray]	1	4	actin filament bundle;actomyosin;bleb;cell part;cell projection;cell projection membrane;cell projection part;contractile fiber;contractile fiber part;cytoplasm;cytoplasmic part;cytoskeletal part;intracellular non-membrane-bounded organelle;intracellular organelle;intracellular organelle part;intracellular part;leading edge membrane;membrane part;muscle thin filament tropomyosin;myofibril;non-mem…	43	43	19	79.9	79.9	45.8	32.68	0	323.31	245010000000	766	35.4392	35.6094	35.5017	34.6743	34.7963	35.1004
+	1.39386	2.32655	P59266	P59266	Fat storage-inducing transmembrane protein 2	Fitm2	Color2 [DarkGray]	1	4	cell part;cytoplasmic part;endoplasmic reticulum membrane;endoplasmic reticulum part;integral to endoplasmic reticulum membrane;integral to membrane;integral to organelle membrane;intracellular membrane-bounded organelle;intracellular organelle;intracellular organelle part;intracellular part;intrinsic to endoplasmic reticulum membrane;intrinsic to membrane;intrinsic to organelle membrane;membrane…	3	3	3	8.8	8.8	8.8	30.016	0	3.4233	44283000	7	23.4614	24.0728	23.7471	20.3405	21.071	22.8902
+	3.60669	-1.38167	P59325	P59325	Eukaryotic translation initiation factor 5	Eif5	Color2 [DarkGray]	1	4	cell part;cytoplasm;intracellular part;membrane;plasma membrane	12	12	12	36.1	36.1	36.1	48.968	0	44.291	1017500000	48	26.3992	26.3383	26.4276	27.5709	27.9454	27.7938
+	3.08659	-0.993821	P60122	P60122	RuvB-like 1	Ruvbl1	Color2 [DarkGray]	1	4	cell part;chromatin remodeling complex;chromosomal part;cytoplasm;cytoplasmic part;DNA helicase complex;extracellular membrane-bounded organelle;extracellular organelle;extracellular region part;extracellular vesicular exosome;Golgi apparatus;H4/H2A histone acetyltransferase complex;histone acetyltransferase complex;histone methyltransferase complex;Ino80 complex;intracellular membrane-bounded or…	6	6	6	18.2	18.2	18.2	50.213	0	21.003	312910000	21	25.1358	24.8189	25.0192	26.0184	25.8711	26.0659
+	2.98085	-0.831358	P60229	P60229	Eukaryotic translation initiation factor 3 subunit E	Eif3e	Color2 [DarkGray]	1	4	cell part;cytoplasm;cytoplasmic part;eukaryotic 43S preinitiation complex;eukaryotic 48S preinitiation complex;eukaryotic translation initiation factor 3 complex;extracellular membrane-bounded organelle;extracellular organelle;extracellular region part;extracellular vesicular exosome;intracellular membrane-bounded organelle;intracellular organelle;intracellular organelle part;intracellular part;m…	13	13	13	30.8	30.8	30.8	52.22	0	36.912	842470000	52	26.5648	26.4966	26.5279	27.5104	27.1828	27.3902
+	4.38003	-1.1591	P60843	P60843	Eukaryotic initiation factor 4A-I	Eif4a1	Color2 [DarkGray]	1	4	cell part;cytoplasm;extracellular membrane-bounded organelle;extracellular organelle;extracellular region part;extracellular vesicular exosome;intracellular non-membrane-bounded organelle;intracellular organelle;intracellular organelle part;intracellular part;membrane;membrane-bounded organelle;membrane-bounded vesicle;non-membrane-bounded organelle;nuclear part;nucleolus;organelle;organelle part…	29	29	14	65.8	65.8	37.2	46.153	0	323.31	8696200000	196	29.7217	29.5953	29.6578	30.7679	30.912	30.7721
+	1.09664	1.65822	P61021	P61021	Ras-related protein Rab-5B	Rab5b	Color2 [DarkGray]	1	4	cell part;cytoplasmic membrane-bounded vesicle;cytoplasmic part;cytoplasmic vesicle;early endosome;early endosome membrane;endocytic vesicle;endosomal part;endosome;endosome membrane;extracellular membrane-bounded organelle;extracellular organelle;extracellular region part;extracellular vesicular exosome;intracellular;intracellular membrane-bounded organelle;intracellular organelle;intracellular …	6	3	3	36.7	21.9	21.9	23.707	0	10.663	121310000	9	24.5413	24.5784	24.5791	21.7095	22.8451	24.1696
+	2.43566	-0.585697	P61082	P61082	NEDD8-conjugating enzyme Ubc12	Ube2m	Color2 [DarkGray]	1	4	cell part;cytoplasm;extracellular membrane-bounded organelle;extracellular organelle;extracellular region part;extracellular vesicular exosome;intracellular part;membrane-bounded organelle;membrane-bounded vesicle;organelle;vesicle	4	4	4	21.9	21.9	21.9	20.9	0	11.197	444010000	14	25.6541	25.9576	25.7305	26.4273	26.3325	26.3396
+	2.41169	-0.687031	P61222	P61222	ATP-binding cassette sub-family E member 1	Abce1	Color2 [DarkGray]	1	4	cell part;cytoplasm;cytoplasmic part;intracellular membrane-bounded organelle;intracellular organelle;intracellular part;membrane;membrane-bounded organelle;mitochondrion;organelle	12	12	12	27.2	27.2	27.2	67.314	0	54.608	694800000	36	26.3268	26.2299	26.496	26.9386	27.2049	26.9703
+	1.88046	-0.88537	P61514	P61514	60S ribosomal protein L37a	Rpl37a	Color2 [DarkGray]	1	4	adherens junction;anchoring junction;cell junction;cell part;cell-substrate adherens junction;cell-substrate junction;cytosolic large ribosomal subunit;extracellular membrane-bounded organelle;extracellular organelle;extracellular region part;extracellular vesicular exosome;focal adhesion;intracellular membrane-bounded organelle;intracellular organelle;intracellular organelle part;intracellular p…	3	3	3	41.3	41.3	41.3	10.275	0	42.844	609760000	27	26.2411	26.1917	25.6448	26.7474	26.9687	27.0175
+	2.77213	-1.06435	P61750	P61750	ADP-ribosylation factor 4	Arf4	Color2 [DarkGray]	1	4	cell part;cell projection membrane;cell projection part;cytoplasm;cytoplasmic part;cytosol;extracellular membrane-bounded organelle;extracellular organelle;extracellular region part;extracellular vesicular exosome;Golgi apparatus;intracellular membrane-bounded organelle;intracellular organelle;intracellular part;leading edge membrane;membrane;membrane part;membrane-bounded organelle;membrane-boun…	8	3	3	54.4	17.8	17.8	20.396	0	14.473	559300000	16	25.897	25.781	25.64	26.764	27.0732	26.674
+	1.45926	-0.557052	P61804	P61804	Dolichyl-diphosphooligosaccharide--protein glycosyltransferase subunit DAD1	Dad1	Color2 [DarkGray]	1	4	cell part;cytoplasmic part;endoplasmic reticulum part;extracellular membrane-bounded organelle;extracellular organelle;extracellular region part;extracellular vesicular exosome;integral to membrane;intracellular organelle part;intracellular part;intrinsic to membrane;macromolecular complex;membrane;membrane part;membrane-bounded organelle;membrane-bounded vesicle;oligosaccharyltransferase complex…	2	2	2	19.5	19.5	19.5	12.497	0	7.1747	175030000	13	24.5777	24.3747	24.3834	24.7501	25.311	24.9459
+	2.40209	-1.43067	P62071	P62071	Ras-related protein R-Ras2	Rras2	Color2 [DarkGray]	1	4	adherens junction;anchoring junction;cell junction;cell part;cell-substrate adherens junction;cell-substrate junction;extracellular membrane-bounded organelle;extracellular organelle;extracellular region part;extracellular vesicular exosome;focal adhesion;intracellular;membrane;membrane-bounded organelle;membrane-bounded vesicle;organelle;plasma membrane;vesicle	5	5	3	28.9	28.9	15.7	23.399	0	44.252	920120000	23	26.3906	26.4241	25.7966	27.8849	27.5375	27.4809
+	2.65011	0.457919	P62242	P62242	40S ribosomal protein S8	Rps8	Color2 [DarkGray]	1	4	adherens junction;anchoring junction;cell junction;cell part;cell-substrate adherens junction;cell-substrate junction;cytoplasm;cytosolic small ribosomal subunit;extracellular membrane-bounded organelle;extracellular organelle;extracellular region part;extracellular vesicular exosome;focal adhesion;intracellular membrane-bounded organelle;intracellular organelle;intracellular organelle part;intra…	11	11	11	57.7	57.7	57.7	24.205	0	134.01	3247500000	96	29.2381	29.1324	29.2817	28.7075	28.8566	28.7143
+	1.96399	-0.482602	P62259	P62259	14-3-3 protein epsilon	Ywhae	Color2 [DarkGray]	1	4	adherens junction;anchoring junction;axon;cell junction;cell part;cell projection;cell-substrate adherens junction;cell-substrate junction;cytoplasmic membrane-bounded vesicle;cytoplasmic part;cytoplasmic vesicle;cytoplasmic vesicle membrane;cytoplasmic vesicle part;cytoskeletal part;cytosol;extracellular membrane-bounded organelle;extracellular organelle;extracellular region part;extracellular v…	20	20	17	75.7	75.7	65.9	29.174	0	222.43	20395000000	215	31.2862	31.1811	31.5062	31.7772	31.902	31.7421
+	1.84404	-0.920667	P62317	P62317	Small nuclear ribonucleoprotein Sm D2	Snrpd2	Color2 [DarkGray]	1	4	catalytic step 2 spliceosome;cell part;cytoplasmic part;cytosol;extracellular membrane-bounded organelle;extracellular organelle;extracellular region part;extracellular vesicular exosome;intracellular organelle part;intracellular part;macromolecular complex;membrane-bounded organelle;membrane-bounded vesicle;methylosome;methyltransferase complex;nuclear part;organelle;organelle part;pICln-Sm prot…	5	5	5	47.5	47.5	47.5	13.527	0	24.089	448630000	16	25.7591	25.7905	25.1184	26.4168	26.4684	26.5448
+	1.06163	-1.69939	P62331	P62331	ADP-ribosylation factor 6	Arf6	Color2 [DarkGray]	1	4	adherens junction;anchoring junction;cell cortex;cell division site part;cell junction;cell part;cell projection;cell projection membrane;cell projection part;cell-substrate adherens junction;cell-substrate junction;cleavage furrow;cytoplasm;cytoplasmic membrane-bounded vesicle;cytoplasmic part;cytoplasmic vesicle;early endosome;endocytic vesicle;endosomal part;endosome;endosome membrane;extracel…	4	4	4	34.9	34.9	34.9	20.082	0	5.0011	102090000	5	21.5532	24.0779	23.1068	24.477	24.9291	24.43
+	1.94051	-0.488626	P62334	P62334	26S protease regulatory subunit 10B	Psmc6	Color2 [DarkGray]	1	4	cell part;cytoplasmic part;cytosolic part;cytosolic proteasome complex;extracellular membrane-bounded organelle;extracellular organelle;extracellular region part;extracellular vesicular exosome;inclusion body;intracellular membrane-bounded organelle;intracellular organelle;intracellular organelle part;intracellular part;macromolecular complex;membrane;membrane-bounded organelle;membrane-bounded v…	16	16	16	57.1	57.1	57.1	44.172	0	129.76	2013000000	89	28.0695	27.9085	28.0709	28.5624	28.6355	28.3169
+	1.12726	-0.717985	P62717	P62717	60S ribosomal protein L18a	Rpl18a	Color2 [DarkGray]	1	4	cell part;cytosolic large ribosomal subunit;intracellular organelle part;intracellular part;large ribosomal subunit;macromolecular complex;membrane;organelle part;ribonucleoprotein complex	6	6	6	31.2	31.2	31.2	20.732	0	11.319	1304600000	36	27.2312	27.6036	26.7471	28.1331	27.5822	28.0207
+	2.73439	-0.424859	P62743	P62743	AP-2 complex subunit sigma	Ap2s1	Color2 [DarkGray]	1	4	AP-2 adaptor complex;AP-type membrane coat adaptor complex;cell part;clathrin adaptor complex;cytoplasmic part;cytoplasmic vesicle part;intracellular organelle part;intracellular part;macromolecular complex;membrane part;organelle part;plasma membrane part;protein complex	4	4	4	25.4	25.4	25.4	17.018	0	6.145	256660000	16	25.161	24.9862	25.0358	25.4622	25.5369	25.4584
+	1.47865	0.519386	P62754	P62754	40S ribosomal protein S6	Rps6	Color2 [DarkGray]	1	4	cell body;cell part;cell projection;cytoplasm;cytoplasmic part;cytosolic small ribosomal subunit;dendrite;intracellular membrane-bounded organelle;intracellular non-membrane-bounded organelle;intracellular organelle;intracellular organelle part;intracellular part;macromolecular complex;membrane;membrane-bounded organelle;neuron projection;non-membrane-bounded organelle;nuclear part;nucleolus;nucl…	7	7	7	34.1	34.1	34.1	28.68	0	44.826	1601600000	58	28.1623	28.1145	28.3164	27.52	27.9802	27.5349
+	1.92162	0.466462	P62835;P35276	P62835	Ras-related protein Rap-1A	Rap1a	Color2 [DarkGray]	1	4	cell junction;cell part;cell projection;clathrin-coated vesicle;coated vesicle;cytoplasm;cytoplasmic membrane-bounded vesicle;cytoplasmic part;cytoplasmic vesicle;cytoplasmic vesicle membrane;cytoplasmic vesicle part;early endosome;endosome;extracellular membrane-bounded organelle;extracellular organelle;extracellular region part;extracellular vesicular exosome;guanyl-nucleotide exchange factor c…	9	3	3	59.8	29.3	29.3	20.987	0	21.746	416510000	24	26.2772	26.1545	26.332	25.7777	25.9541	25.6325
+	0.995753	2.41575	P62843	P62843	40S ribosomal protein S15	Rps15	Color2 [DarkGray]	1	4	adherens junction;anchoring junction;cell junction;cell part;cell-substrate adherens junction;cell-substrate junction;cytoplasm;cytosolic small ribosomal subunit;focal adhesion;intracellular organelle part;intracellular part;macromolecular complex;membrane;organelle part;ribonucleoprotein complex;small ribosomal subunit	2	2	2	23.4	23.4	23.4	17.04	0.00038551	2.5786	228750000	5	25.964	25.3655	25.6915	21.8197	22.4794	25.4746
+	0.89895	3.36945	P62855	P62855	40S ribosomal protein S26	Rps26	Color2 [DarkGray]	1	4	cell part;cytosolic small ribosomal subunit;extracellular membrane-bounded organelle;extracellular organelle;extracellular region part;extracellular vesicular exosome;intracellular non-membrane-bounded organelle;intracellular organelle;intracellular organelle part;intracellular part;macromolecular complex;membrane;membrane-bounded organelle;membrane-bounded vesicle;non-membrane-bounded organelle;…	2	2	2	20.9	20.9	20.9	13.015	0	5.4141	781950000	10	27.2567	27.1859	26.8653	21.9053	22.0742	27.2199
+	2.13503	0.51755	P62897;P00015	P62897	Cytochrome c, somatic	Cycs	Color2 [DarkGray]	1	4	cell part;cytoplasmic part;cytosol;intracellular membrane-bounded organelle;intracellular organelle;intracellular organelle part;intracellular part;membrane part;membrane-bounded organelle;membrane-enclosed lumen;mitochondrial intermembrane space;mitochondrial part;mitochondrion;myelin sheath;organelle;organelle envelope lumen;organelle part;respiratory chain	11	11	6	65.7	65.7	40	11.605	0	249.43	80077000000	215	33.6899	33.782	33.7857	33.1284	33.1457	33.4307
+	2.4106	-0.707679	P62900	P62900	60S ribosomal protein L31	Rpl31	Color2 [DarkGray]	1	4	adherens junction;anchoring junction;cell junction;cell part;cell-substrate adherens junction;cell-substrate junction;cytosolic large ribosomal subunit;extracellular membrane-bounded organelle;extracellular organelle;extracellular region part;extracellular vesicular exosome;focal adhesion;intracellular organelle part;intracellular part;large ribosomal subunit;macromolecular complex;membrane;membr…	4	4	4	26.4	26.4	26.4	14.463	0	4.5786	1436000000	23	26.8986	26.9044	26.6313	27.4284	27.4585	27.6705
+	2.51618	0.386296	P62908	P62908	40S ribosomal protein S3	Rps3	Color2 [DarkGray]	1	4	adherens junction;anchoring junction;cell junction;cell part;cell projection membrane;cell projection part;cell-substrate adherens junction;cell-substrate junction;cytoplasm;cytoplasmic part;cytoskeletal part;cytosol;cytosolic small ribosomal subunit;extracellular membrane-bounded organelle;extracellular organelle;extracellular region part;extracellular vesicular exosome;focal adhesion;intracellu…	17	17	17	72.4	72.4	72.4	26.674	0	53.163	3858900000	149	29.4325	29.3451	29.4908	28.9578	29.0462	29.1056
+	2.95312	-1.20631	P62911;P17932	P62911;P17932	60S ribosomal protein L32;Putative 60S ribosomal protein L32	Rpl32;Rpl32-ps	Color2 [DarkGray]	1	4	cell part;centrosome;cytoplasmic part;cytoskeletal part;cytosolic large ribosomal subunit;intracellular non-membrane-bounded organelle;intracellular organelle;intracellular organelle part;intracellular part;large ribosomal subunit;macromolecular complex;membrane;microtubule organizing center;non-membrane-bounded organelle;organelle;organelle part;ribonucleoprotein complex;ribosome	4	4	4	23	23	23	15.86	0	31.456	1162700000	23	26.8644	26.8191	26.4973	27.7728	27.9594	28.0675
+	1.57191	-0.67079	P62918	P62918	60S ribosomal protein L8	Rpl8	Color2 [DarkGray]	1	4	adherens junction;anchoring junction;cell junction;cell part;cell-substrate adherens junction;cell-substrate junction;cytoplasm;cytosolic large ribosomal subunit;focal adhesion;intracellular non-membrane-bounded organelle;intracellular organelle;intracellular organelle part;intracellular part;large ribosomal subunit;macromolecular complex;membrane;non-membrane-bounded organelle;nuclear part;nucle…	13	13	13	58.8	58.8	58.8	28.024	0	135.96	3641300000	78	28.8767	28.956	28.419	29.2203	29.4886	29.5553
+	3.15369	-1.1094	P62960;Q9Z2C8	P62960;Q9Z2C8	Nuclease-sensitive element-binding protein 1;Y-box-binding protein 2	Ybx1;Ybx2	Color2 [DarkGray]	1	4	cell part;CRD-mediated mRNA stability complex;cytoplasm;cytoplasmic part;extracellular membrane-bounded organelle;extracellular organelle;extracellular region part;extracellular vesicular exosome;histone pre-mRNA 3'end processing complex;intracellular membrane-bounded organelle;intracellular non-membrane-bounded organelle;intracellular organelle;intracellular organelle part;intracellular part;mac…	8	8	4	43.2	43.2	30.7	35.73	0	184.34	1649400000	96	27.3682	27.389	27.1166	28.2503	28.4374	28.5144
+	1.69813	-0.629517	P63005	P63005	Platelet-activating factor acetylhydrolase IB subunit alpha	Pafah1b1	Color2 [DarkGray]	1	4	astral microtubule;axon;cell body;cell cortex;cell part;cell projection;cell projection part;centrosome;chromosomal part;cilium;cytoplasm;cytoplasmic microtubule;cytoplasmic part;cytoskeletal part;cytoskeleton;cytosol;envelope;extracellular membrane-bounded organelle;extracellular organelle;extracellular region part;extracellular vesicular exosome;growth cone;intracellular non-membrane-bounded or…	13	13	13	38.3	38.3	38.3	46.67	0	80.546	801330000	50	26.7784	26.6352	26.3964	27.3998	27.3126	26.9862
+	3.23649	-1.2091	P63028	P63028	Translationally-controlled tumor protein	Tpt1	Color2 [DarkGray]	1	4	cell part;cytoplasm;cytoplasmic part;endosome;extracellular membrane-bounded organelle;extracellular organelle;extracellular region part;extracellular space;extracellular vesicular exosome;intracellular membrane-bounded organelle;intracellular organelle;intracellular organelle part;intracellular part;late endosome;membrane-bounded organelle;membrane-bounded vesicle;multivesicular body;nuclear par…	7	7	7	34.9	34.9	34.9	19.462	0	86.152	5898700000	88	29.0311	29.1968	28.9998	30.4959	30.1753	30.1838
+	2.42624	0.372464	P63038	P63038	60 kDa heat shock protein, mitochondrial	Hspd1	Color2 [DarkGray]	1	4	cell part;cell surface;coated pit;coated vesicle;cyclin-dependent protein kinase activating kinase holoenzyme complex;cytoplasm;cytoplasmic membrane-bounded vesicle;cytoplasmic part;cytoplasmic vesicle;cytosol;early endosome;endosome;extracellular membrane-bounded organelle;extracellular organelle;extracellular region part;extracellular space;extracellular vesicular exosome;intracellular membrane…	43	43	43	77.1	77.1	77.1	60.955	0	323.31	43099000000	599	32.857	32.8169	32.9165	32.4028	32.4803	32.5898
+	1.78188	0.45004	P63094;Q6R0H7;Q8CGK7	P63094;Q6R0H7	Guanine nucleotide-binding protein G(s) subunit alpha isoforms short;Guanine nucleotide-binding protein G(s) subunit alpha isoforms XLas	Gnas	Color2 [DarkGray]	1	4	cell part;cell projection;cytoplasm;cytoplasmic part;cytosol;dendrite;extracellular membrane-bounded organelle;extracellular organelle;extracellular region part;extracellular vesicular exosome;extrinsic to internal side of plasma membrane;extrinsic to membrane;extrinsic to plasma membrane;Golgi apparatus part;Golgi membrane;heterotrimeric G-protein complex;intracellular membrane-bounded organelle…	9	8	8	29.4	26.6	26.6	45.663	0	30.063	336810000	36	25.8815	25.87	26.0376	25.2856	25.5376	25.6157
+	1.04082	-1.6618	P63168	P63168	Dynein light chain 1, cytoplasmic	Dynll1	Color2 [DarkGray]	1	4	cell part;centrosome;chromosomal part;cytoplasm;cytoplasmic dynein complex;cytoplasmic part;cytoskeletal part;cytoskeleton;cytosol;dynein complex;extracellular membrane-bounded organelle;extracellular organelle;extracellular region part;extracellular vesicular exosome;intracellular membrane-bounded organelle;intracellular non-membrane-bounded organelle;intracellular organelle;intracellular organe…	4	2	2	57.3	32.6	32.6	10.366	0	10.105	172080000	12	24.4312	21.888	23.5234	24.7996	25.1185	24.9099
+	1.99052	-1.44939	P63254	P63254	Cysteine-rich protein 1	Crip1	Color2 [DarkGray]	1	4	cell part;cytoplasm;intracellular part	3	3	3	59.7	59.7	59.7	8.5497	0	28.719	462450000	22	25.6224	25.3741	24.5741	26.6627	26.6039	26.6521
+	1.02068	-1.77014	P68181	P68181	cAMP-dependent protein kinase catalytic subunit beta	Prkacb	Color2 [DarkGray]	1	4	cAMP-dependent protein kinase complex;cell part;centrosome;cytoplasmic part;cytoskeletal part;cytosol;extracellular membrane-bounded organelle;extracellular organelle;extracellular region part;extracellular vesicular exosome;intracellular membrane-bounded organelle;intracellular non-membrane-bounded organelle;intracellular organelle;intracellular organelle part;intracellular part;macromolecular c…	8	2	2	26.5	10.3	10.3	40.707	0	12.39	208610000	8	24.9075	22.9623	22.4875	25.6163	24.5485	25.503
+	1.70353	-0.640025	P68254	P68254	14-3-3 protein theta	Ywhaq	Color2 [DarkGray]	1	4	adherens junction;anchoring junction;cell junction;cell part;cell-substrate adherens junction;cell-substrate junction;cytoplasmic part;cytoplasmic vesicle membrane;cytoplasmic vesicle part;cytosol;extracellular membrane-bounded organelle;extracellular organelle;extracellular region part;extracellular vesicular exosome;focal adhesion;intracellular organelle part;intracellular part;macromolecular c…	13	9	9	53.5	39.6	39.6	27.778	0	113.85	1570500000	52	27.6581	27.3021	27.732	28.0253	28.3943	28.1926
+	2.9784	0.850439	P68368	P68368	Tubulin alpha-4A chain	Tuba4a	Color2 [DarkGray]	1	4	cell part;cytoplasm;cytoskeletal part;extracellular membrane-bounded organelle;extracellular organelle;extracellular region part;extracellular vesicular exosome;intracellular organelle part;intracellular part;macromolecular complex;membrane-bounded organelle;membrane-bounded vesicle;microtubule;organelle;organelle part;protein complex;vesicle	26	4	4	61.6	12.1	12.1	49.924	0	19.094	6538100000	34	30.3352	30.352	30.5502	29.4257	29.5879	29.6726
+	1.25032	1.02275	P68373	P68373	Tubulin alpha-1C chain	Tuba1c	Color2 [DarkGray]	1	4	cell part;cytoplasmic microtubule;cytoplasmic part;cytoskeletal part;intracellular membrane-bounded organelle;intracellular organelle;intracellular organelle part;intracellular part;macromolecular complex;membrane-bounded organelle;microtubule;nucleus;organelle;organelle part;protein complex;vesicle	28	2	1	70.2	8.5	5.3	49.909	0	17.886	784010000	20	27.5679	27.0149	27.4981	26.5882	25.6603	26.7641
+	1.79652	-0.942368	P68510	P68510	14-3-3 protein eta	Ywhah	Color2 [DarkGray]	1	4	cell junction;cell part;cell-cell contact zone;cell-cell junction;cytoplasm;cytoplasmic part;cytoplasmic vesicle membrane;cytoplasmic vesicle part;cytosol;extracellular membrane-bounded organelle;extracellular organelle;extracellular region part;extracellular vesicular exosome;intercalated disc;intracellular organelle part;intracellular part;membrane;membrane-bounded organelle;membrane-bounded ve…	14	11	10	57.3	47.2	43.1	28.211	0	129.42	2614800000	51	28.3917	28.2713	27.6714	29.1927	29.0313	28.9374
+	1.09551	-2.67855	P70122	P70122	Ribosome maturation protein SBDS	Sbds	Color2 [DarkGray]	1	4	cell part;cytoplasm;cytoskeletal part;intracellular membrane-bounded organelle;intracellular non-membrane-bounded organelle;intracellular organelle;intracellular organelle part;intracellular part;membrane-bounded organelle;non-membrane-bounded organelle;nuclear part;nucleolus;nucleoplasm;nucleus;organelle;organelle part;spindle pole	7	7	7	28.4	28.4	28.4	28.78	0	13.316	188800000	13	24.3408	20.5709	23.5413	25.62	25.5207	25.348
+	2.21045	-0.605106	P70168	P70168	Importin subunit beta-1	Kpnb1	Color2 [DarkGray]	1	4	cell part;cytoplasm;cytoplasmic part;endoplasmic reticulum part;endoplasmic reticulum tubular network;envelope;extracellular membrane-bounded organelle;extracellular organelle;extracellular region part;extracellular vesicular exosome;intracellular organelle part;intracellular part;macromolecular complex;membrane;membrane-bounded organelle;membrane-bounded vesicle;nuclear envelope;nuclear membrane…	19	19	19	28	28	28	97.183	0	94.308	2445900000	78	28.2049	28.0349	28.4214	28.8674	28.8275	28.7816
+	3.01238	0.789529	P70404	P70404	Isocitrate dehydrogenase [NAD] subunit gamma 1, mitochondrial	Idh3g	Color2 [DarkGray]	1	4	cell part;cytoplasmic part;intracellular membrane-bounded organelle;intracellular non-membrane-bounded organelle;intracellular organelle;intracellular organelle part;intracellular part;membrane-bounded organelle;mitochondrion;non-membrane-bounded organelle;nuclear part;nucleolus;nucleoplasm;organelle;organelle part	14	14	14	46.6	46.6	46.6	42.785	0	323.31	21175000000	262	31.9823	32.0162	32.1217	31.1804	31.1596	31.4116
+	2.4608	-2.59819	P70460	P70460	Vasodilator-stimulated phosphoprotein	Vasp	Color2 [DarkGray]	1	4	adherens junction;anchoring junction;cell junction;cell part;cell projection;cell projection membrane;cell projection part;cell-cell junction;cell-substrate adherens junction;cell-substrate junction;cytoplasm;cytoplasmic part;cytoskeleton;cytosol;extracellular membrane-bounded organelle;extracellular organelle;extracellular region part;extracellular vesicular exosome;filopodium;filopodium membran…	6	6	6	18.7	18.7	18.7	39.666	0	13.423	118060000	8	22.0192	21.3719	22.8196	24.6734	24.7154	24.6165
+	1.86689	0.47284	P70670;Q60817	P70670	Nascent polypeptide-associated complex subunit alpha, muscle-specific form	Naca	Color2 [DarkGray]	1	4	cell part;cytoplasm;extracellular membrane-bounded organelle;extracellular organelle;extracellular region part;extracellular vesicular exosome;intracellular membrane-bounded organelle;intracellular organelle;intracellular part;membrane-bounded organelle;membrane-bounded vesicle;nucleus;organelle;vesicle	59	59	59	46.1	46.1	46.1	220.5	0	323.31	6884600000	349	30.216	30.3502	30.3786	29.7035	30.0375	29.7853
+	2.25627	1.46539	P70695	P70695	Fructose-1,6-bisphosphatase isozyme 2	Fbp2	Color2 [DarkGray]	1	4	cell junction;cell part;contractile fiber part;cytoplasmic part;extracellular membrane-bounded organelle;extracellular organelle;extracellular region part;extracellular vesicular exosome;intracellular membrane-bounded organelle;intracellular organelle;intracellular part;membrane-bounded organelle;membrane-bounded vesicle;nucleus;organelle;organelle part;vesicle;Z disc	5	5	5	22.4	22.4	22.4	36.947	0	23.022	239380000	17	25.8081	25.9146	25.8258	24.0642	24.173	24.9151
+	1.55934	2.36055	P70697	P70697	Uroporphyrinogen decarboxylase	Urod	Color2 [DarkGray]	1	4	cell part;cytoplasm;cytoplasmic part;cytosol;intracellular organelle part;intracellular part;nuclear part;nucleoplasm;organelle part	4	4	4	12.5	12.5	12.5	40.691	0	6.5839	201520000	6	25.6549	26.0884	25.7005	22.5842	22.9767	24.8012
+	2.65669	-4.59747	P70698;P70303	P70698	CTP synthase 1	Ctps1	Color2 [DarkGray]	1	4	cell part;cytoplasmic part;intracellular membrane-bounded organelle;intracellular organelle;intracellular part;membrane;membrane-bounded organelle;mitochondrion;organelle	22	22	22	48.2	48.2	48.2	66.682	0	138.91	1253800000	68	25.1575	23.2359	23.1433	28.4275	28.5203	28.3813
+	3.39664	-0.660594	P80313	P80313	T-complex protein 1 subunit eta	Cct7	Color2 [DarkGray]	1	4	cell body;cell part;chaperonin-containing T-complex;cytoplasmic part;cytoskeletal part;cytosolic part;extracellular membrane-bounded organelle;extracellular organelle;extracellular region part;extracellular vesicular exosome;intracellular membrane-bounded organelle;intracellular organelle;intracellular organelle part;intracellular part;macromolecular complex;membrane-bounded organelle;membrane-bo…	21	21	21	46	46	46	59.652	0	99.361	3225800000	113	28.5444	28.5567	28.6325	29.291	29.2938	29.1306
+	3.29035	-0.51726	P80314	P80314	T-complex protein 1 subunit beta	Cct2	Color2 [DarkGray]	1	4	cell body;cell part;chaperonin-containing T-complex;cytoplasm;cytoplasmic part;cytoskeletal part;cytosolic part;extracellular membrane-bounded organelle;extracellular organelle;extracellular region part;extracellular vesicular exosome;intracellular organelle part;intracellular part;macromolecular complex;membrane-bounded organelle;membrane-bounded vesicle;microtubule;myelin sheath;organelle;organ…	25	25	25	57.4	57.4	57.4	57.477	0	252.85	4576800000	126	29.1545	29.1737	29.1961	29.7867	29.667	29.6224
+	3.3188	-0.6853	P80315	P80315	T-complex protein 1 subunit delta	Cct4	Color2 [DarkGray]	1	4	cell body;cell part;centrosome;chaperonin-containing T-complex;cytoplasm;cytoplasmic membrane-bounded vesicle;cytoplasmic part;cytoplasmic vesicle;cytoskeletal part;cytosolic part;extracellular membrane-bounded organelle;extracellular organelle;extracellular region part;extracellular vesicular exosome;intracellular membrane-bounded organelle;intracellular non-membrane-bounded organelle;intracellu…	23	23	23	44.2	44.2	44.2	58.066	0	183.57	3376500000	114	28.6587	28.5587	28.6867	29.2883	29.4237	29.2481
+	2.64254	-0.710543	P80316	P80316	T-complex protein 1 subunit epsilon	Cct5	Color2 [DarkGray]	1	4	cell body;cell part;centrosome;chaperonin-containing T-complex;cytoplasm;cytoplasmic part;cytoskeletal part;cytosolic part;extracellular membrane-bounded organelle;extracellular organelle;extracellular region part;extracellular vesicular exosome;intracellular non-membrane-bounded organelle;intracellular organelle;intracellular organelle part;intracellular part;macromolecular complex;membrane-boun…	25	25	25	62.7	62.7	62.7	59.623	0	314.89	4493800000	139	28.9197	28.8334	29.1702	29.7171	29.682	29.6559
+	2.80954	-0.617184	P80317;Q61390	P80317	T-complex protein 1 subunit zeta	Cct6a	Color2 [DarkGray]	1	4	acrosomal vesicle;cell body;cell part;chaperonin-containing T-complex;cytoplasmic membrane-bounded vesicle;cytoplasmic part;cytoplasmic vesicle;cytoskeletal part;cytosolic part;extracellular membrane-bounded organelle;extracellular organelle;extracellular region part;extracellular vesicular exosome;intracellular membrane-bounded organelle;intracellular organelle;intracellular organelle part;intra…	19	19	19	42.6	42.6	42.6	58.004	0	148.69	3030900000	108	28.5037	28.4089	28.6557	29.2084	29.0858	29.1257
+	3.29984	-0.539681	P80318	P80318	T-complex protein 1 subunit gamma	Cct3	Color2 [DarkGray]	1	4	cell body;cell part;chaperonin-containing T-complex;cytoplasm;cytoplasmic part;cytoskeletal part;cytosolic part;extracellular membrane-bounded organelle;extracellular organelle;extracellular region part;extracellular vesicular exosome;intracellular organelle part;intracellular part;macromolecular complex;membrane;membrane-bounded organelle;membrane-bounded vesicle;microtubule;myelin sheath;organe…	23	23	23	52.3	52.3	52.3	60.629	0	142.77	4496300000	154	29.1649	29.044	29.2066	29.6701	29.7147	29.6496
+	1.95493	0.430988	P82349	P82349	Beta-sarcoglycan	Sgcb	Color2 [DarkGray]	1	4	cell part;cytoplasm;cytoskeleton;dystroglycan complex;dystrophin-associated glycoprotein complex;integral to membrane;integral to plasma membrane;intracellular non-membrane-bounded organelle;intracellular organelle;intracellular part;intrinsic to membrane;intrinsic to plasma membrane;macromolecular complex;membrane;membrane part;non-membrane-bounded organelle;organelle;plasma membrane;plasma memb…	9	9	9	47.5	47.5	47.5	34.872	0	38.514	893880000	52	27.1856	27.3984	27.4453	26.8056	26.9815	26.9493
+	2.64188	0.479873	P82350	P82350	Alpha-sarcoglycan	Sgca	Color2 [DarkGray]	1	4	cell junction;cell part;cell-cell junction;cytoplasm;cytoskeleton;dystroglycan complex;integral to membrane;integral to plasma membrane;intracellular non-membrane-bounded organelle;intracellular organelle;intracellular part;intrinsic to membrane;intrinsic to plasma membrane;macromolecular complex;membrane;membrane part;membrane raft;non-membrane-bounded organelle;organelle;plasma membrane;plasma …	12	12	12	40.6	40.6	40.6	43.286	0	54.137	1299200000	84	27.8501	27.9641	27.9243	27.3301	27.4285	27.5403
+	1.50385	-0.758305	P83882	P83882	60S ribosomal protein L36a	Rpl36a	Color2 [DarkGray]	1	4	cell part;cytoplasmic part;intracellular non-membrane-bounded organelle;intracellular organelle;intracellular part;macromolecular complex;non-membrane-bounded organelle;organelle;ribonucleoprotein complex;ribosome	4	4	4	30.2	30.2	30.2	12.441	0	8.5329	456040000	15	25.964	25.8303	25.2692	26.3448	26.3567	26.6369
+	3.3376	-0.430058	P84091	P84091	AP-2 complex subunit mu	Ap2m1	Color2 [DarkGray]	1	4	AP-type membrane coat adaptor complex;cell part;clathrin adaptor complex;coated pit;cytoplasmic membrane-bounded vesicle;cytoplasmic part;cytoplasmic vesicle;extracellular membrane-bounded organelle;extracellular organelle;extracellular region part;extracellular vesicular exosome;intracellular membrane-bounded organelle;intracellular organelle;intracellular part;macromolecular complex;membrane;me…	12	12	12	34.5	34.5	34.5	49.654	0	40.057	745840000	47	26.5779	26.5466	26.6786	27.0404	27.013	27.0398
+	0.837766	2.5152	P84104	P84104	Serine/arginine-rich splicing factor 3	Srsf3	Color2 [DarkGray]	1	4	cell part;cytoplasm;intracellular organelle part;intracellular part;nuclear body;nuclear part;nuclear speck;nucleoplasm part;organelle part	4	3	3	23.2	23.2	23.2	19.329	0	7.0093	400530000	9	26.3932	26.3247	26.358	22.9875	21.9756	26.5672
+	2.02618	-0.872348	P97314	P97314	Cysteine and glycine-rich protein 2	Csrp2	Color2 [DarkGray]	1	4	adherens junction;anchoring junction;cell junction;cell part;cell-substrate adherens junction;cell-substrate junction;focal adhesion;intracellular membrane-bounded organelle;intracellular organelle;intracellular part;membrane-bounded organelle;nucleus;organelle	4	4	4	23.8	23.8	23.8	20.926	0	14.063	137730000	11	24.0415	23.6166	23.9318	24.5132	24.982	24.7118
+	2.82403	0.647253	P97370	P97370	Sodium/potassium-transporting ATPase subunit beta-3	Atp1b3	Color2 [DarkGray]	1	4	caveola;cell part;cytoplasm;cytoplasmic membrane-bounded vesicle;cytoplasmic part;cytoplasmic vesicle;extracellular membrane-bounded organelle;extracellular organelle;extracellular region part;extracellular vesicular exosome;intracellular membrane-bounded organelle;intracellular organelle;intracellular part;macromolecular complex;melanosome;membrane;membrane part;membrane raft;membrane-bounded or…	3	3	3	15.5	15.5	15.5	31.775	0	9.5279	351860000	9	26.0001	26.0831	26.1615	25.3378	25.569	25.396
+	1.05363	-0.946569	P97379	P97379	Ras GTPase-activating protein-binding protein 2	G3bp2	Color2 [DarkGray]	1	4	cell part;cytoplasm;intracellular part	4	3	3	10	7.5	7.5	54.087	0	5.469	101120000	8	24.1418	22.7478	23.2428	24.11	24.4035	24.4586
+	2.56837	0.526086	P97384	P97384	Annexin A11	Anxa11	Color2 [DarkGray]	1	4	azurophil granule;cell part;cytoplasm;cytoplasmic membrane-bounded vesicle;cytoplasmic part;cytoplasmic vesicle;cytoskeletal part;endocytic vesicle;envelope;extracellular membrane-bounded organelle;extracellular organelle;extracellular region part;extracellular vesicular exosome;intracellular membrane-bounded organelle;intracellular non-membrane-bounded organelle;intracellular organelle;intracell…	16	16	16	31.6	31.6	31.6	54.079	0	51.25	1530200000	69	28.0811	28.0351	28.1976	27.4549	27.6621	27.6186
+	1.1248	-0.793772	P97429	P97429	Annexin A4	Anxa4	Color2 [DarkGray]	1	4	apical plasma membrane;cell part;cell surface;cytoplasm;cytoplasmic part;extracellular membrane-bounded organelle;extracellular organelle;extracellular region part;extracellular vesicular exosome;intracellular membrane-bounded organelle;intracellular organelle;intracellular organelle part;intracellular part;membrane;membrane part;membrane-bounded organelle;membrane-bounded vesicle;nuclear membran…	13	13	13	48.3	48.3	48.3	35.915	0	88.817	769210000	34	26.4091	25.9699	26.7172	27.5568	27.2265	26.6943
+	2.37486	0.400954	P97443	P97443	Histone-lysine N-methyltransferase Smyd1	Smyd1	Color2 [DarkGray]	1	4	cell part;cytoplasm;intracellular membrane-bounded organelle;intracellular organelle;intracellular part;membrane-bounded organelle;nucleus;organelle	23	23	23	66.7	66.7	66.7	56.495	0	323.31	7503000000	159	30.3585	30.3817	30.4303	29.9885	29.877	30.1021
+	3.33349	-2.33502	P97447	P97447	Four and a half LIM domains protein 1	Fhl1	Color2 [DarkGray]	1	4	adherens junction;anchoring junction;cell junction;cell part;cell-substrate adherens junction;cell-substrate junction;cytoplasm;focal adhesion;intracellular membrane-bounded organelle;intracellular organelle;intracellular part;membrane;membrane-bounded organelle;nucleus;organelle;plasma membrane	14	14	14	62.5	62.5	62.5	31.888	0	217.86	6350700000	145	28.2967	28.0283	28.4545	30.8251	30.7287	30.2308
+	1.70795	0.478245	P97449	P97449	Aminopeptidase N	Anpep	Color2 [DarkGray]	1	4	cell part;cytoplasmic part;endoplasmic reticulum-Golgi intermediate compartment;external side of plasma membrane;extracellular membrane-bounded organelle;extracellular organelle;extracellular region part;extracellular space;extracellular vesicular exosome;integral to membrane;intracellular membrane-bounded organelle;intracellular organelle;intracellular organelle part;intracellular part;intrinsic…	7	7	7	8.8	8.8	8.8	109.65	0	16.457	301190000	19	25.9337	25.601	25.9393	25.2414	25.3493	25.4485
+	1.22029	1.53334	P97467	P97467	Peptidyl-glycine alpha-amidating monooxygenase;Peptidylglycine alpha-hydroxylating monooxygenase;Peptidyl-alpha-hydroxyglycine alpha-amidating lyase	Pam	Color2 [DarkGray]	1	4	cell part;cytoplasmic part;cytoplasmic vesicle membrane;cytoplasmic vesicle part;cytosol;extracellular membrane-bounded organelle;extracellular organelle;extracellular region part;extracellular vesicular exosome;integral to membrane;integral to plasma membrane;intracellular organelle part;intracellular part;intrinsic to membrane;intrinsic to plasma membrane;membrane;membrane part;membrane-bounded…	9	9	9	12.6	12.6	12.6	108.96	0	26.104	331350000	20	26.4799	25.866	26.6349	25.7278	23.8515	24.8015
+	2.38453	0.800319	P97478	P97478	5-demethoxyubiquinone hydroxylase, mitochondrial	Coq7	Color2 [DarkGray]	1	4	cell part;cytoplasmic part;intracellular membrane-bounded organelle;intracellular organelle;intracellular organelle part;intracellular part;membrane;membrane-bounded organelle;mitochondrial inner membrane;mitochondrial membrane;mitochondrial part;mitochondrion;nucleus;organelle;organelle inner membrane;organelle membrane;organelle part	6	6	6	32.7	32.7	32.7	24.041	0	39.468	1034300000	42	27.5972	27.7474	27.7124	26.6982	26.8282	27.1297
+	2.12135	1.08819	P97493	P97493	Thioredoxin, mitochondrial	Txn2	Color2 [DarkGray]	1	4	cell body;cell part;cell projection;cytoplasmic part;dendrite;intracellular membrane-bounded organelle;intracellular non-membrane-bounded organelle;intracellular organelle;intracellular organelle part;intracellular part;membrane-bounded organelle;mitochondrion;neuron projection;neuronal cell body;non-membrane-bounded organelle;nuclear part;nucleolus;organelle;organelle part	4	4	4	37.3	37.3	37.3	18.255	0	43.601	482650000	24	26.8832	26.3442	26.9573	25.6565	25.807	25.4566
+	1.98572	0.606959	P97742	P97742	Carnitine O-palmitoyltransferase 1, liver isoform	Cpt1a	Color2 [DarkGray]	1	4	cell part;cytoplasmic part;integral to membrane;integral to mitochondrial membrane;integral to mitochondrial outer membrane;integral to organelle membrane;intracellular membrane-bounded organelle;intracellular organelle;intracellular organelle part;intracellular part;intrinsic to membrane;intrinsic to mitochondrial outer membrane;intrinsic to organelle membrane;membrane;membrane part;membrane-bou…	10	8	8	18.4	15.7	15.7	88.25	0	15.8	450830000	28	26.2275	26.5433	26.6245	25.7561	25.8726	25.9458
+	4.17288	0.71874	P97807	P97807	Fumarate hydratase, mitochondrial	Fh	Color2 [DarkGray]	1	4	cell part;cytoplasmic part;extracellular membrane-bounded organelle;extracellular organelle;extracellular region part;extracellular vesicular exosome;intracellular membrane-bounded organelle;intracellular organelle;intracellular part;macromolecular complex;membrane-bounded organelle;membrane-bounded vesicle;mitochondrion;organelle;protein complex;tricarboxylic acid cycle enzyme complex;vesicle	30	30	30	70.8	70.8	70.8	54.356	0	323.31	53570000000	423	33.3097	33.3162	33.4001	32.5669	32.6335	32.6694
+	2.03263	-2.00869	P98203	P98203	Armadillo repeat protein deleted in velo-cardio-facial syndrome homolog	Arvcf	Color2 [DarkGray]	1	4	cell junction;cell part;cytoplasm;intracellular membrane-bounded organelle;intracellular organelle;intracellular organelle part;intracellular part;membrane;membrane-bounded organelle;nuclear part;nucleoplasm;nucleus;organelle;organelle part;plasma membrane	7	7	7	9.4	9.4	9.4	105.06	0	13.556	153300000	9	23.0258	23.21	21.8774	24.7969	24.5292	24.8133
+	2.16902	-0.909442	P99026	P99026	Proteasome subunit beta type-4	Psmb4	Color2 [DarkGray]	1	4	cell part;cytoplasm;cytoplasmic part;cytosol;extracellular membrane-bounded organelle;extracellular organelle;extracellular region part;extracellular vesicular exosome;intracellular membrane-bounded organelle;intracellular organelle;intracellular part;macromolecular complex;membrane-bounded organelle;membrane-bounded vesicle;nucleus;organelle;proteasome complex;proteasome core complex;protein com…	6	6	6	31.8	31.8	31.8	29.116	0	44.013	860410000	28	26.6946	26.6491	26.1654	27.4845	27.4388	27.3141
+	2.71721	0.997187	P99029	P99029	Peroxiredoxin-5, mitochondrial	Prdx5	Color2 [DarkGray]	1	4	cell part;cytoplasm;cytoplasmic part;cytoplasmic vesicle;cytosol;extracellular membrane-bounded organelle;extracellular organelle;extracellular region part;extracellular space;extracellular vesicular exosome;intracellular membrane-bounded organelle;intracellular organelle;intracellular organelle lumen;intracellular organelle part;intracellular part;membrane-bounded organelle;membrane-bounded vesi…	12	12	12	57.6	57.6	57.6	21.897	0	167.18	10837000000	195	31.1481	31.2816	31.1304	29.9396	30.3694	30.2595
+	0.858324	1.4498	Q00612;P97324	Q00612;P97324	Glucose-6-phosphate 1-dehydrogenase X;Glucose-6-phosphate 1-dehydrogenase 2	G6pdx;G6pd2	Color2 [DarkGray]	1	4	cell part;centrosome;cytoplasm;cytoplasmic part;cytoskeletal part;cytosol;extracellular membrane-bounded organelle;extracellular organelle;extracellular region part;extracellular vesicular exosome;internal side of plasma membrane;intracellular membrane-bounded organelle;intracellular non-membrane-bounded organelle;intracellular organelle;intracellular organelle part;intracellular part;membrane;me…	7	7	7	11.8	11.8	11.8	59.262	0	7.7721	114700000	7	25.7363	24.1648	24.1412	23.2616	22.209	24.2223
+	1.4081	0.643459	Q00897	Q00897	Alpha-1-antitrypsin 1-4	Serpina1d	Color2 [DarkGray]	1	4	cell part;cytoplasmic part;endoplasmic reticulum;extracellular membrane-bounded organelle;extracellular organelle;extracellular region;extracellular region part;extracellular space;extracellular vesicular exosome;Golgi apparatus;intracellular membrane-bounded organelle;intracellular organelle;intracellular part;membrane-bounded organelle;membrane-bounded vesicle;organelle;vesicle	12	3	3	37.5	12.1	12.1	45.998	0	19.514	237450000	15	25.1575	25.6192	25.8066	24.8953	24.7229	25.0347
+	1.84939	-3.81332	Q00915	Q00915	Retinol-binding protein 1	Rbp1	Color2 [DarkGray]	1	4	cell body;cell part;cytoplasmic part;cytosol;intracellular part	9	9	9	78.5	78.5	78.5	15.846	0	44.038	573090000	24	25.1494	22.6731	22.3033	27.0315	27.595	26.9393
+	1.91429	-0.568331	Q01405	Q01405	Protein transport protein Sec23A	Sec23a	Color2 [DarkGray]	1	4	cell part;coated vesicle;COPII vesicle coat;cytoplasmic membrane-bounded vesicle;cytoplasmic part;cytoplasmic vesicle;cytoplasmic vesicle part;endoplasmic reticulum membrane;endoplasmic reticulum part;ER to Golgi transport vesicle;Golgi apparatus part;Golgi membrane;intracellular membrane-bounded organelle;intracellular organelle;intracellular organelle part;intracellular part;macromolecular comp…	16	16	14	28	28	24.3	86.161	0	89.685	856840000	43	26.6013	26.5747	26.9655	27.3505	27.2567	27.2393
+	3.14326	-0.746636	Q01768	Q01768	Nucleoside diphosphate kinase B	Nme2	Color2 [DarkGray]	1	4	cell part;cell periphery;cell projection;cytoplasm;cytoplasmic part;cytosol;extracellular membrane-bounded organelle;extracellular organelle;extracellular region part;extracellular vesicular exosome;intracellular membrane-bounded organelle;intracellular organelle;intracellular part;lamellipodium;membrane;membrane-bounded organelle;membrane-bounded vesicle;mitochondrion;myelin sheath;nucleus;organ…	15	15	9	84.2	84.2	53.3	17.363	0	311.51	36269000000	255	32.0693	31.8643	32.12	32.7884	32.7678	32.7374
+	2.13305	-0.430852	Q02248	Q02248	Catenin beta-1	Ctnnb1	Color2 [DarkGray]	1	4	adherens junction;anchoring junction;apical junction complex;apical part of cell;basolateral plasma membrane;beta-catenin destruction complex;beta-catenin-TCF7L2 complex;catenin complex;catenin-TCF7L2 complex;cell cortex;cell junction;cell part;cell periphery;cell projection;cell projection membrane;cell projection part;cell-cell adherens junction;cell-cell contact zone;cell-cell junction;cell-su…	20	15	15	35.2	29.8	29.8	85.47	0	124.91	1945600000	101	27.8719	28.0388	28.0388	28.5117	28.4401	28.2903
+	2.09668	1.14578	Q02357	Q02357	Ankyrin-1	Ank1	Color2 [DarkGray]	1	4	axolemma;axon part;cell cortex part;cell part;cell projection membrane;cell projection part;contractile fiber part;cortical cytoskeleton;cytoplasmic part;cytoskeleton;endoplasmic reticulum;intracellular membrane-bounded organelle;intracellular non-membrane-bounded organelle;intracellular organelle;intracellular part;leading edge membrane;M band;membrane;membrane part;membrane-bounded organelle;ne…	18	15	15	12.8	11.7	11.7	204.22	0	35.903	293930000	20	26.2147	25.8994	25.9729	25.3046	24.7295	24.6157
+	2.13313	-2.46109	Q03173	Q03173	Protein enabled homolog	Enah	Color2 [DarkGray]	1	4	actin cytoskeleton;actin filament bundle;actomyosin;adherens junction;anchoring junction;cell junction;cell part;cell projection;cell-substrate adherens junction;cell-substrate junction;cytoplasm;cytoplasmic part;cytoskeletal part;cytoskeleton;cytosol;filopodium;focal adhesion;intracellular non-membrane-bounded organelle;intracellular organelle;intracellular organelle part;intracellular part;lame…	4	4	4	6	6	6	85.843	0	11.465	102270000	7	22.5924	23.0745	21.4699	24.8862	25.0173	24.6165
+	3.15752	0.552541	Q03265	Q03265	ATP synthase subunit alpha, mitochondrial	Atp5a1	Color2 [DarkGray]	1	4	cell part;cytoplasmic part;extracellular membrane-bounded organelle;extracellular organelle;extracellular region part;extracellular vesicular exosome;intracellular membrane-bounded organelle;intracellular organelle;intracellular organelle part;intracellular part;macromolecular complex;membrane;membrane part;membrane-bounded organelle;membrane-bounded vesicle;mitochondrial inner membrane;mitochond…	44	44	44	72.3	72.3	72.3	59.752	0	323.31	464180000000	1781	36.3026	36.4127	36.4538	35.7823	35.8214	35.9077
+	1.29247	0.599613	Q05BC3	Q05BC3	Echinoderm microtubule-associated protein-like 1	Eml1	Color2 [DarkGray]	1	4	cell part;cytoplasmic part;cytoskeletal part;cytosol;intracellular organelle part;intracellular part;macromolecular complex;microtubule;organelle part;perinuclear region of cytoplasm;protein complex	9	9	9	14.4	14.4	14.4	89.679	0	21.425	285430000	26	25.9007	25.962	25.5118	24.8607	25.3607	25.3542
+	2.6368	0.957706	Q06138;Q9DB16	Q06138	Calcium-binding protein 39	Cab39	Color2 [DarkGray]	1	4	cell part;cytoplasm;extracellular membrane-bounded organelle;extracellular organelle;extracellular region part;extracellular vesicular exosome;intracellular part;macromolecular complex;membrane-bounded organelle;membrane-bounded vesicle;organelle;protein complex;vesicle	5	5	5	15	15	15	39.842	0	13.547	173610000	22	25.3033	25.1768	25.1792	24.5089	24.0563	24.221
+	1.95765	0.617749	Q06185	Q06185	ATP synthase subunit e, mitochondrial	Atp5i	Color2 [DarkGray]	1	4	cell part;cytoplasmic part;intracellular membrane-bounded organelle;intracellular organelle;intracellular organelle part;intracellular part;macromolecular complex;membrane part;membrane-bounded organelle;mitochondrial membrane part;mitochondrial part;mitochondrial proton-transporting ATP synthase complex;mitochondrial proton-transporting ATP synthase complex, coupling factor F(o);mitochondrion;or…	7	7	7	73.2	73.2	73.2	8.2355	0	28.731	13717000000	161	31.3731	31.3121	31.3469	30.6035	30.5758	30.9996
+	0.86781	1.19011	Q06770	Q06770	Corticosteroid-binding globulin	Serpina6	Color2 [DarkGray]	1	4	extracellular membrane-bounded organelle;extracellular organelle;extracellular region part;extracellular space;extracellular vesicular exosome;membrane-bounded organelle;membrane-bounded vesicle;organelle;vesicle	4	4	4	10.8	10.8	10.8	44.769	0	12.935	282090000	12	26.1088	25.6122	26.2374	23.5833	25.3053	25.4994
+	3.60201	-1.87717	Q07113	Q07113	Cation-independent mannose-6-phosphate receptor	Igf2r	Color2 [DarkGray]	1	4	adherens junction;anchoring junction;cell junction;cell part;cell surface;cell-substrate adherens junction;cell-substrate junction;clathrin coat;clathrin-coated vesicle;coated vesicle;cytoplasmic membrane-bounded vesicle;cytoplasmic part;cytoplasmic vesicle;endocytic vesicle;endosome;extracellular membrane-bounded organelle;extracellular organelle;extracellular region part;extracellular space;ext…	23	23	23	12.7	12.7	12.7	273.81	0	49.173	572700000	38	25.2048	25.3276	25.0182	27.2472	27.1067	26.8282
+	4.22899	0.92242	Q07417	Q07417	Short-chain specific acyl-CoA dehydrogenase, mitochondrial	Acads	Color2 [DarkGray]	1	4	cell part;cytoplasmic part;intracellular membrane-bounded organelle;intracellular organelle;intracellular organelle lumen;intracellular organelle part;intracellular part;membrane;membrane-bounded organelle;membrane-enclosed lumen;mitochondrial matrix;mitochondrial membrane;mitochondrial part;mitochondrion;nucleus;organelle;organelle lumen;organelle membrane;organelle part	17	17	17	56.6	56.6	56.6	44.889	0	197.72	15825000000	254	31.7694	31.6819	31.6239	30.71	30.8082	30.7898
+	2.23332	-1.5075	Q07813	Q07813	Apoptosis regulator BAX	Bax	Color2 [DarkGray]	1	4	BAX complex;Bcl-2 family protein complex;cell part;cytoplasm;cytoplasmic part;cytosol;endoplasmic reticulum;endoplasmic reticulum membrane;endoplasmic reticulum part;envelope;extracellular membrane-bounded organelle;extracellular organelle;extracellular region part;extracellular vesicular exosome;integral to membrane;intracellular;intracellular membrane-bounded organelle;intracellular organelle;i…	4	4	4	29.7	29.7	29.7	21.394	0	9.8206	286580000	10	24.3277	24.2485	24.8674	25.837	26.391	25.7381
+	1.5132	0.519519	Q08857	Q08857	Platelet glycoprotein 4	Cd36	Color2 [DarkGray]	1	4	cell part;cell surface;cytoplasmic part;external side of plasma membrane;extracellular region part;extracellular space;Golgi apparatus;integral to membrane;intracellular membrane-bounded organelle;intracellular organelle;intracellular part;intrinsic to membrane;membrane;membrane part;membrane raft;membrane-bounded organelle;organelle;plasma membrane;plasma membrane part	14	14	14	32.2	32.2	32.2	52.697	0	159.08	11978000000	128	31.0449	31.0899	31.2431	30.8966	30.5018	30.421
+	1.15076	-1.30273	Q148W8	Q148W8	Inactive dual specificity phosphatase 27	Dusp27	Color2 [DarkGray]	1	4		4	4	4	6	6	6	128.57	0	8.2385	64077000	6	22.1394	22.6665	23.8917	24.3371	23.9661	24.3025
+	3.52864	0.561942	Q14C51	Q14C51	Pentatricopeptide repeat domain-containing protein 3, mitochondrial	Ptcd3	Color2 [DarkGray]	1	4	cell part;cytoplasmic part;intracellular membrane-bounded organelle;intracellular organelle;intracellular part;membrane-bounded organelle;mitochondrion;organelle	12	12	12	23.6	23.6	23.6	77.795	0	37.447	683020000	36	27.04	26.9951	27.1064	26.5495	26.477	26.4291
+	1.91167	0.819208	Q1XH17	Q1XH17	Tripartite motif-containing protein 72	Trim72	Color2 [DarkGray]	1	4	cell part;cytoplasmic part;cytoplasmic vesicle membrane;cytoplasmic vesicle part;intracellular organelle part;intracellular part;membrane;organelle membrane;organelle part;plasma membrane;sarcolemma;vesicle membrane	21	21	21	65.4	65.4	65.4	52.816	0	323.31	16414000000	187	31.5299	31.5939	31.9541	30.7261	30.7513	31.1429
+	1.4648	2.12735	Q91VK1;Q2L4X1	Q91VK1;Q2L4X1	Basic leucine zipper and W2 domain-containing protein 2	Bzw2	Color2 [DarkGray]	1	4	cell part;membrane	8	8	7	20.5	20.5	18.9	48.063	0	15.717	276420000	25	26.2393	26.1699	26.1674	22.771	24.3871	25.0364
+	3.03027	0.587538	Q2TPA8	Q2TPA8	Hydroxysteroid dehydrogenase-like protein 2	Hsdl2	Color2 [DarkGray]	1	4	cell part;cytoplasmic part;intracellular membrane-bounded organelle;intracellular organelle;intracellular part;membrane;membrane-bounded organelle;microbody;mitochondrion;organelle;peroxisome	23	23	23	63.1	63.1	63.1	54.208	0	285.69	7050900000	188	30.3328	30.4135	30.4797	29.7351	29.8142	29.9141
+	1.41387	0.678603	Q3TC72	Q3TC72	Fumarylacetoacetate hydrolase domain-containing protein 2A	Fahd2	Color2 [DarkGray]	1	4	cell part;cytoplasmic part;intracellular membrane-bounded organelle;intracellular organelle;intracellular part;membrane-bounded organelle;mitochondrion;organelle	6	6	6	29.4	29.4	29.4	34.69	0	35.274	451360000	20	26.2278	26.598	26.6501	25.5675	25.7093	26.1634
+	2.25599	-2.8898	Q3TDN2	Q3TDN2	FAS-associated factor 2	Faf2	Color2 [DarkGray]	1	4	Cdc48p-Npl4p-Ufd1p AAA ATPase complex;cell part;cytoplasmic part;endoplasmic reticulum;endoplasmic reticulum part;intracellular membrane-bounded organelle;intracellular organelle;intracellular organelle part;intracellular part;lipid particle;macromolecular complex;membrane part;membrane-bounded organelle;organelle;organelle part;protein complex	4	4	4	12.6	12.6	12.6	52.471	0	6.431	113100000	5	22.7356	20.9333	21.834	24.5925	24.9375	24.6423
+	1.32469	1.27479	Q3THG9	Q3THG9	Alanyl-tRNA editing protein Aarsd1	Aarsd1	Color2 [DarkGray]	1	4	cell part;cytoplasm;intracellular membrane-bounded organelle;intracellular organelle;intracellular part;membrane-bounded organelle;nucleus;organelle	3	3	3	8.7	8.7	8.7	44.97	0	4.4173	69895000	5	23.9608	24.2001	24.1712	22.4993	22.2924	23.7161
+	1.9488	0.745836	Q3TL44	Q3TL44	NLR family member X1	Nlrx1	Color2 [DarkGray]	1	4	cell part;cytoplasmic part;intracellular membrane-bounded organelle;intracellular organelle;intracellular organelle part;intracellular part;membrane;membrane-bounded organelle;mitochondrial membrane;mitochondrial outer membrane;mitochondrial part;mitochondrion;organelle;organelle membrane;organelle outer membrane;organelle part;outer membrane	7	7	7	8.7	8.7	8.7	107.83	0	14.493	107200000	19	24.202	24.4456	24.5621	23.8384	23.7281	23.4057
+	1.20055	1.0327	Q3U186	Q3U186	Probable arginine--tRNA ligase, mitochondrial	Rars2	Color2 [DarkGray]	1	4	cell part;cytoplasmic part;intracellular membrane-bounded organelle;intracellular organelle;intracellular organelle lumen;intracellular organelle part;intracellular part;membrane-bounded organelle;membrane-enclosed lumen;mitochondrial matrix;mitochondrial part;mitochondrion;organelle;organelle lumen;organelle part	2	2	2	3.6	3.6	3.6	65.335	0	8.0906	71168000	5	23.7066	24.0903	23.9477	22.2662	22.7801	23.6003
+	1.94665	-0.666206	Q3UGC7;Q66JS6	Q3UGC7;Q66JS6	Eukaryotic translation initiation factor 3 subunit J-A;Eukaryotic translation initiation factor 3 subunit J-B	Eif3j1;Eif3j2	Color2 [DarkGray]	1	4	cell part;cytoplasmic part;eukaryotic 43S preinitiation complex;eukaryotic 48S preinitiation complex;eukaryotic translation initiation factor 3 complex;intracellular part;macromolecular complex;protein complex;ribonucleoprotein complex;translation preinitiation complex	8	8	8	36.8	36.8	36.8	29.343	0	29.755	353770000	19	25.1719	25.539	25.361	25.8218	26.0677	26.1811
+	0.922681	5.59119	Q3UHC2	Q3UHC2	Leucine-rich repeat serine/threonine-protein kinase 1	Lrrk1	Color2 [DarkGray]	1	4	cell part;cytoplasm;cytoplasmic part;intracellular membrane-bounded organelle;intracellular organelle;intracellular part;membrane-bounded organelle;mitochondrion;organelle	2	2	2	0.8	0.8	0.8	225.47	0.0059922	1.8313	13985000000	17	30.9497	30.9408	31.0492	21.876	23.2998	30.9903
+	1.76897	0.504147	Q3UIJ9	Q3UIJ9	Myocardial zonula adherens protein	Myzap	Color2 [DarkGray]	1	4	cell junction;cell part;contractile fiber part;cytoplasmic part;cytoskeleton;extrinsic to internal side of plasma membrane;extrinsic to membrane;extrinsic to plasma membrane;I band;intracellular non-membrane-bounded organelle;intracellular organelle;intracellular part;membrane part;non-membrane-bounded organelle;organelle;organelle part;plasma membrane part;Z disc	9	9	9	23.2	23.2	23.2	53.896	0	18.806	243690000	19	25.3967	25.5407	25.6285	25.183	24.8125	25.0579
+	3.13669	0.697304	Q3UIZ8	Q3UIZ8	Myosin light chain kinase 3	Mylk3	Color2 [DarkGray]	1	4	cell part;cytoplasm;cytoplasmic part;cytosol;intracellular part	15	15	15	28.6	28.6	28.6	86.371	0	99.109	1520100000	79	28.1613	28.2337	28.3481	27.4493	27.6141	27.5878
+	2.73358	1.08104	Q3ULD5	Q3ULD5	Methylcrotonoyl-CoA carboxylase beta chain, mitochondrial	Mccc2	Color2 [DarkGray]	1	4	cell part;cytoplasmic part;intracellular membrane-bounded organelle;intracellular organelle;intracellular organelle lumen;intracellular organelle part;intracellular part;membrane-bounded organelle;membrane-enclosed lumen;mitochondrial matrix;mitochondrial part;mitochondrion;organelle;organelle lumen;organelle part	17	17	17	44	44	44	61.378	0	124.47	2041100000	107	28.7379	28.8362	28.883	27.48	27.7675	27.9665
+	3.24035	-0.967888	Q3URD3	Q3URD3	Sarcolemmal membrane-associated protein	Slmap	Color2 [DarkGray]	1	4	cell part;contractile fiber part;cytoplasmic part;cytoskeletal part;extracellular region part;extracellular space;integral to membrane;intracellular organelle part;intracellular part;intrinsic to membrane;M band;membrane;membrane part;microtubule organizing center;organelle part;plasma membrane;sarcolemma;Z disc	21	21	21	20.9	20.9	20.9	96.932	0	159.03	3881300000	110	28.551	28.6081	28.7708	29.7515	29.5668	29.5153
+	1.09235	2.34561	Q3URE1	Q3URE1	Acyl-CoA synthetase family member 3, mitochondrial	Acsf3	Color2 [DarkGray]	1	4	cell part;cytoplasmic part;intracellular membrane-bounded organelle;intracellular organelle;intracellular part;membrane-bounded organelle;mitochondrion;organelle	5	5	5	13.9	13.9	13.9	65.076	0	18.463	180070000	7	25.4399	25.4192	25.5672	21.5271	22.8705	24.9919
+	1.96617	0.517883	Q3URS9	Q3URS9	Coiled-coil domain-containing protein 51	Ccdc51	Color2 [DarkGray]	1	4	cell part;cytoplasmic part;integral to membrane;intracellular membrane-bounded organelle;intracellular organelle;intracellular organelle part;intracellular part;intrinsic to membrane;membrane part;membrane-bounded organelle;mitochondrion;nuclear part;nucleoplasm;organelle;organelle part	6	6	6	14.5	14.5	14.5	45.132	0	11.846	136840000	10	24.7921	24.7849	24.505	24.2094	24.2693	24.0496
+	2.92285	-1.52822	Q3UTJ2	Q3UTJ2	Sorbin and SH3 domain-containing protein 2	Sorbs2	Color2 [DarkGray]	1	4	adherens junction;anchoring junction;cell junction;cell part;cell-substrate adherens junction;cell-substrate junction;contractile fiber part;cytoplasmic part;cytoskeleton;focal adhesion;intracellular non-membrane-bounded organelle;intracellular organelle;intracellular part;membrane;non-membrane-bounded organelle;organelle;organelle part;perinuclear region of cytoplasm;plasma membrane;Z disc	34	34	33	34.8	34.8	33.9	132.35	0	323.31	10803000000	397	29.4492	29.7568	29.7383	31.444	31.1846	30.9003
+	2.28871	-2.53024	Q3UZ39	Q3UZ39	Leucine-rich repeat flightless-interacting protein 1	Lrrfip1	Color2 [DarkGray]	1	4	cell part;cytoplasm;intracellular membrane-bounded organelle;intracellular organelle;intracellular part;membrane;membrane-bounded organelle;nucleus;organelle;plasma membrane	4	4	3	6.4	6.4	4.8	79.248	0	13.191	84892000	6	21.7976	21.518	22.8536	24.3944	24.3685	24.997
+	2.4832	0.947395	Q3V384	Q3V384	Lactation elevated protein 1	Lace1	Color2 [DarkGray]	1	4	cell part;cytoplasmic part;intracellular membrane-bounded organelle;intracellular organelle;intracellular part;membrane-bounded organelle;mitochondrion;organelle	12	12	12	35.2	35.2	35.2	54.313	0	71.101	1039600000	60	27.6677	27.8184	27.9166	26.5905	26.9583	27.0118
+	1.67892	-0.504637	Q3V3R4	Q3V3R4	Integrin alpha-1	Itga1	Color2 [DarkGray]	1	4	acrosomal vesicle;adherens junction;alpha1-beta1 integrin complex;anchoring junction;basal part of cell;cell junction;cell part;cell projection;cell surface;cell-substrate adherens junction;cell-substrate junction;cytoplasmic membrane-bounded vesicle;cytoplasmic part;cytoplasmic vesicle;external side of plasma membrane;extracellular membrane-bounded organelle;extracellular organelle;extracellular…	9	9	9	8.5	8.5	8.5	130.81	0	24.613	214910000	21	24.8894	24.8902	24.5698	25.292	25.4335	25.1379
+	4.69974	-6.97229	Q4U4S6	Q4U4S6	Xin actin-binding repeat-containing protein 2	Xirp2	Color2 [DarkGray]	1	4	cell junction;cell part;contractile fiber part;cytoplasmic part;intracellular part;organelle part;Z disc	102	102	102	36.7	36.7	36.7	428.25	0	323.31	6162200000	233	23.7409	23.6625	23.8958	30.1892	31.1781	30.8488
+	1.21636	-0.628258	Q4VAA2	Q4VAA2	Protein CDV3	Cdv3	Color2 [DarkGray]	1	4	cell part;cytoplasm;intracellular non-membrane-bounded organelle;intracellular organelle;intracellular organelle part;intracellular part;membrane;non-membrane-bounded organelle;nuclear part;nucleolus;organelle;organelle part;plasma membrane	3	3	3	17.1	17.1	17.1	29.729	0	5.761	96484000	11	23.5192	23.6907	23.5745	24.1742	24.6564	23.8386
+	2.58523	1.05793	Q4VAE3	Q4VAE3	Transmembrane protein 65	Tmem65	Color2 [DarkGray]	1	4	cell part;cytoplasmic part;integral to membrane;intracellular membrane-bounded organelle;intracellular organelle;intracellular part;intrinsic to membrane;membrane part;membrane-bounded organelle;mitochondrion;organelle	5	5	5	22.2	22.2	22.2	24.918	0	17.331	495820000	28	26.5532	26.8381	26.9333	25.542	25.6903	25.9185
+	2.44364	0.982976	Q505D7	Q505D7	Optic atrophy 3 protein homolog	Opa3	Color2 [DarkGray]	1	4	cell part;cytoplasmic part;intracellular membrane-bounded organelle;intracellular organelle;intracellular part;membrane-bounded organelle;mitochondrion;organelle	4	4	4	19.6	19.6	19.6	20.11	0	11.262	431330000	21	26.6346	26.428	26.5178	25.6289	25.2541	25.7486
+	2.57235	-0.855735	Q505F5	Q505F5	Leucine-rich repeat-containing protein 47	Lrrc47	Color2 [DarkGray]	1	4		8	8	8	16.4	16.4	16.4	63.589	0	24.416	334520000	20	25.255	25.3297	24.9314	26.0321	26.0968	25.9543
+	1.51093	-1.92791	Q5BKP2	Q5BKP2	Ubiquitin carboxyl-terminal hydrolase 13	Usp13	Color2 [DarkGray]	1	4	cell part;cytoplasmic part;intracellular membrane-bounded organelle;intracellular organelle;intracellular part;lysosome;lytic vacuole;membrane-bounded organelle;organelle;vacuole	3	3	3	6.5	6.5	6.5	96.722	0	21.236	78265000	8	23.1088	21.1666	22.3403	24.008	24.4702	23.9213
+	4.07964	0.728537	Q5EBG6	Q5EBG6	Heat shock protein beta-6	Hspb6	Color2 [DarkGray]	1	4	cell part;cytoplasm;intracellular membrane-bounded organelle;intracellular organelle;intracellular part;membrane-bounded organelle;nucleus;organelle	6	6	6	52.5	52.5	52.5	17.521	0	39.679	2986800000	53	29.2049	29.1559	29.2331	28.3996	28.4756	28.5331
+	1.63448	0.685947	Q5FW52	Q5FW52	Muscular LMNA-interacting protein	Mlip	Color2 [DarkGray]	1	4	cell part;envelope;intracellular membrane-bounded organelle;intracellular organelle;intracellular organelle lumen;intracellular organelle part;intracellular part;membrane-bounded organelle;membrane-enclosed lumen;nuclear body;nuclear envelope;nuclear lumen;nuclear part;nucleoplasm part;nucleus;organelle;organelle envelope;organelle lumen;organelle part;PML body	3	3	3	20.4	20.4	20.4	29.465	0	20.529	294210000	13	25.7003	26.0117	25.8484	24.8542	25.213	25.4353
+	2.67723	0.813183	Q5M8N4	Q5M8N4	Epimerase family protein SDR39U1	Sdr39u1	Color2 [DarkGray]	1	4	cell part;intracellular membrane-bounded organelle;intracellular organelle;intracellular part;membrane-bounded organelle;nucleus;organelle	6	6	6	25.6	25.6	25.6	32.994	0	20.046	567870000	38	26.9536	26.8627	26.7655	25.8627	26.0678	26.2116
+	1.25093	0.671563	Q5SRX1	Q5SRX1	TOM1-like protein 2	Tom1l2	Color2 [DarkGray]	1	4	cell part;extracellular membrane-bounded organelle;extracellular organelle;extracellular region part;extracellular vesicular exosome;intracellular;membrane-bounded organelle;membrane-bounded vesicle;organelle;vesicle	2	2	2	6.3	6.3	6.3	55.662	0	24.241	188970000	8	25.2011	24.9306	25.1478	24.0613	24.3322	24.8713
+	1.82127	0.65373	Q5SUC9	Q5SUC9	Protein SCO1 homolog, mitochondrial	Sco1	Color2 [DarkGray]	1	4	cell part;contractile fiber;cytoplasmic part;intracellular membrane-bounded organelle;intracellular non-membrane-bounded organelle;intracellular organelle;intracellular part;membrane-bounded organelle;mitochondrion;myofibril;non-membrane-bounded organelle;organelle	2	2	2	10.2	10.2	10.2	31.617	0	5.7521	145370000	13	24.7616	25.0456	24.6477	24.0038	24.1199	24.3699
+	2.92927	0.937888	Q5SW19	Q5SW19	Clustered mitochondria protein homolog	Cluh	Color2 [DarkGray]	1	4	cell part;cytoplasm;intracellular part	21	21	21	19.7	19.7	19.7	148.07	0	55.4	804990000	65	27.5333	27.2969	27.3891	26.2947	26.5117	26.5992
+	4.15248	-9.27872	Q5SX39	Q5SX39	Myosin-4	Myh4	Color2 [DarkGray]	1	4	cell part;contractile fiber;cytoplasmic part;cytoskeletal part;cytosol;intracellular non-membrane-bounded organelle;intracellular organelle;intracellular organelle part;intracellular part;macromolecular complex;myofibril;myosin complex;myosin filament;non-membrane-bounded organelle;organelle;organelle part;protein complex	54	4	1	16.9	1.3	0.4	222.86	0	20.52	35020000000	134	23.8655	22.1741	23.562	32.6811	32.1523	32.6044
+	2.40586	-0.621972	Q5XJY5	Q5XJY5	Coatomer subunit delta	Arcn1	Color2 [DarkGray]	1	4	AP-type membrane coat adaptor complex;cell part;clathrin adaptor complex;coated vesicle;COPI vesicle coat;COPI-coated vesicle;cytoplasm;cytoplasmic membrane-bounded vesicle;cytoplasmic part;cytoplasmic vesicle;cytoplasmic vesicle part;endoplasmic reticulum;Golgi apparatus;Golgi apparatus part;Golgi-associated vesicle;intracellular membrane-bounded organelle;intracellular organelle;intracellular o…	10	10	10	25	25	25	57.229	0	32.33	492190000	26	25.8358	25.8816	25.9503	26.3216	26.6525	26.5595
+	3.20744	0.497129	Q60597	Q60597	2-oxoglutarate dehydrogenase, mitochondrial	Ogdh	Color2 [DarkGray]	1	4	cell part;cytoplasmic part;intracellular membrane-bounded organelle;intracellular organelle;intracellular organelle lumen;intracellular organelle part;intracellular part;macromolecular complex;membrane;membrane-bounded organelle;membrane-enclosed lumen;mitochondrial matrix;mitochondrial membrane;mitochondrial part;mitochondrion;organelle;organelle lumen;organelle membrane;organelle part;oxoglutar…	65	65	65	62.7	62.7	62.7	116.45	0	323.31	91561000000	960	34.0048	33.9858	34.1308	33.5044	33.5414	33.5842
+	1.8959	-1.40146	Q60598	Q60598	Src substrate cortactin	Cttn	Color2 [DarkGray]	1	4	actin filament;adherens junction;anchoring junction;cation channel complex;cell cortex;cell cortex part;cell junction;cell part;cell projection;cell projection part;cell-substrate adherens junction;cell-substrate junction;coated pit;cortical cytoskeleton;cytoplasm;cytoplasmic part;cytoskeletal part;cytoskeleton;cytosol;dendritic spine;extracellular membrane-bounded organelle;extracellular organel…	11	11	11	24.2	24.2	24.2	61.249	0	30.93	354790000	27	25.083	25.1898	24.22	26.3627	26.3225	26.012
+	1.5278	0.543823	Q60631	Q60631	Growth factor receptor-bound protein 2	Grb2	Color2 [DarkGray]	1	4	cell junction;cell part;cell-cell junction;cytoplasm;cytoplasmic part;cytosol;endosome;extracellular membrane-bounded organelle;extracellular organelle;extracellular region part;extracellular vesicular exosome;Golgi apparatus;Grb2-EGFR complex;intracellular membrane-bounded organelle;intracellular non-membrane-bounded organelle;intracellular organelle;intracellular organelle part;intracellular pa…	8	8	8	38.7	38.7	38.7	25.238	0	14.736	275800000	24	25.6323	25.6723	25.7613	24.8255	25.3174	25.2916
+	4.45319	-0.656717	Q60692	Q60692	Proteasome subunit beta type-6	Psmb6	Color2 [DarkGray]	1	4	cell part;cytoplasm;cytoplasmic part;cytosol;extracellular membrane-bounded organelle;extracellular organelle;extracellular region part;extracellular vesicular exosome;Golgi apparatus;intracellular membrane-bounded organelle;intracellular organelle;intracellular organelle part;intracellular part;macromolecular complex;membrane-bounded organelle;membrane-bounded vesicle;nuclear part;nucleoplasm;nu…	5	5	5	26.9	26.9	26.9	25.378	0	14.47	701970000	33	26.387	26.3592	26.3929	27.0593	27.0744	26.9755
+	0.990633	1.91304	Q60714	Q60714	Long-chain fatty acid transport protein 1	Slc27a1	Color2 [DarkGray]	1	4	cell part;cytoplasmic part;cytoplasmic vesicle;endoplasmic reticulum;integral to membrane;intracellular membrane-bounded organelle;intracellular organelle;intracellular part;intrinsic to membrane;membrane;membrane part;membrane-bounded organelle;organelle;plasma membrane;vesicle	6	6	6	13.5	13.5	13.5	71.275	0	24.847	230060000	22	25.9347	25.7352	25.7071	22.0864	24.5929	24.9586
+	1.22331	-1.07104	Q60715	Q60715	Prolyl 4-hydroxylase subunit alpha-1	P4ha1	Color2 [DarkGray]	1	4	cell part;cytoplasmic part;endoplasmic reticulum;endoplasmic reticulum lumen;endoplasmic reticulum part;intracellular membrane-bounded organelle;intracellular organelle;intracellular organelle lumen;intracellular organelle part;intracellular part;macromolecular complex;membrane;membrane-bounded organelle;membrane-enclosed lumen;mitochondrion;organelle;organelle lumen;organelle part;procollagen-pr…	7	7	7	16.3	16.3	16.3	60.909	0	24.868	182200000	15	24.2021	24.5406	23.5009	24.9219	25.6993	24.8355
+	2.56786	1.06438	Q60759	Q60759	Glutaryl-CoA dehydrogenase, mitochondrial	Gcdh	Color2 [DarkGray]	1	4	cell part;cytoplasmic part;intracellular membrane-bounded organelle;intracellular organelle;intracellular organelle lumen;intracellular organelle part;intracellular part;membrane;membrane-bounded organelle;membrane-enclosed lumen;mitochondrial inner membrane;mitochondrial matrix;mitochondrial membrane;mitochondrial part;mitochondrion;organelle;organelle inner membrane;organelle lumen;organelle me…	12	12	12	40.4	40.4	40.4	48.605	0	70.454	924620000	42	27.5831	27.7186	27.7117	26.3791	26.5391	26.9021
+	2.16754	0.786723	Q60766	Q60766	Immunity-related GTPase family M protein 1	Irgm1	Color2 [DarkGray]	1	4	autophagic vacuole membrane;cell part;cell projection;cytoplasmic part;cytoplasmic vesicle membrane;cytoplasmic vesicle part;endocytic vesicle membrane;endoplasmic reticulum;endosomal part;endosome;endosome membrane;Golgi apparatus part;Golgi membrane;intracellular membrane-bounded organelle;intracellular organelle;intracellular organelle part;intracellular part;late endosome;late endosome membra…	2	2	2	5.1	5.1	5.1	46.551	0	3.2017	42345000	6	23.512	23.0691	23.2839	22.4505	22.3881	22.6661
+	2.07913	-4.3878	Q60847	Q60847	Collagen alpha-1(XII) chain	Col12a1	Color2 [DarkGray]	1	4	collagen;extracellular matrix;extracellular matrix part;extracellular membrane-bounded organelle;extracellular organelle;extracellular region part;extracellular space;extracellular vesicular exosome;membrane-bounded organelle;membrane-bounded vesicle;organelle;proteinaceous extracellular matrix;vesicle	17	17	17	7.9	7.9	7.9	340.21	0	40.245	347310000	34	20.7237	22.2023	23.8072	26.7075	26.8628	26.3263
+	2.76543	-0.565398	Q60864	Q60864	Stress-induced-phosphoprotein 1	Stip1	Color2 [DarkGray]	1	4	cell part;cytoplasmic part;cytosol;intracellular membrane-bounded organelle;intracellular organelle;intracellular part;membrane-bounded organelle;myelin sheath;nucleus;organelle	28	28	28	52.1	52.1	52.1	62.581	0	179.32	3512200000	114	28.7891	28.8446	28.7212	29.3188	29.4785	29.2538
+	4.07916	0.66208	Q60931	Q60931	Voltage-dependent anion-selective channel protein 3	Vdac3	Color2 [DarkGray]	1	4	cell part;cytoplasmic part;extracellular membrane-bounded organelle;extracellular organelle;extracellular region part;extracellular vesicular exosome;intracellular membrane-bounded organelle;intracellular organelle;intracellular organelle part;intracellular part;macromolecular complex;membrane;membrane part;membrane-bounded organelle;membrane-bounded vesicle;mitochondrial inner membrane;mitochond…	12	12	12	49.5	49.5	49.5	30.752	0	304.28	13695000000	237	31.3138	31.3778	31.4368	30.6745	30.7334	30.7344
+	3.44114	0.598105	Q60932	Q60932	Voltage-dependent anion-selective channel protein 1	Vdac1	Color2 [DarkGray]	1	4	cell part;cytoplasmic part;extracellular membrane-bounded organelle;extracellular organelle;extracellular region part;extracellular vesicular exosome;intracellular membrane-bounded organelle;intracellular non-membrane-bounded organelle;intracellular organelle;intracellular organelle part;intracellular part;macromolecular complex;membrane;membrane part;membrane-bounded organelle;membrane-bounded v…	18	18	18	66.2	66.2	66.2	32.351	0	323.31	62488000000	646	33.4365	33.5643	33.4766	32.8226	32.9507	32.9099
+	3.46202	2.11339	Q60936	Q60936	Atypical kinase ADCK3, mitochondrial	Adck3	Color2 [DarkGray]	1	4	cell part;cytoplasmic part;integral to membrane;intracellular membrane-bounded organelle;intracellular organelle;intracellular part;intrinsic to membrane;membrane part;membrane-bounded organelle;mitochondrion;organelle	19	19	19	38.6	38.6	38.6	71.742	0	184.22	4051100000	134	30.065	30.0074	30.1554	27.6973	27.8809	28.3095
+	1.26794	1.03527	Q61187	Q61187	Tumor susceptibility gene 101 protein	Tsg101	Color2 [DarkGray]	1	4	cell part;cytoplasm;cytoplasmic part;early endosome;endosomal part;endosome;endosome membrane;ESCRT I complex;extracellular membrane-bounded organelle;extracellular organelle;extracellular region part;extracellular vesicular exosome;intracellular membrane-bounded organelle;intracellular non-membrane-bounded organelle;intracellular organelle;intracellular organelle part;intracellular part;late end…	2	2	2	7.2	7.2	7.2	44.123	0	9.7419	65999000	5	23.9624	24.086	23.9938	22.3782	22.8721	23.686
+	1.87649	0.487303	Q61234	Q61234	Alpha-1-syntrophin	Snta1	Color2 [DarkGray]	1	4	cell junction;cell part;cytoplasm;cytoskeleton;intracellular;intracellular non-membrane-bounded organelle;intracellular organelle;intracellular part;macromolecular complex;membrane;non-membrane-bounded organelle;organelle;plasma membrane;postsynaptic membrane;protein complex;sarcolemma;synapse part;synaptic membrane	12	11	11	31.8	30.4	30.4	53.664	0	84.143	1894500000	58	28.3971	28.391	28.5795	28.1624	27.8749	27.8683
+	1.11894	-1.0868	Q61235	Q61235	Beta-2-syntrophin	Sntb2	Color2 [DarkGray]	1	4	adherens junction;anchoring junction;cell junction;cell part;cell-substrate adherens junction;cell-substrate junction;cytoplasm;cytoplasmic part;cytoplasmic vesicle membrane;cytoplasmic vesicle part;cytoskeletal part;extracellular membrane-bounded organelle;extracellular organelle;extracellular region part;extracellular vesicular exosome;focal adhesion;intracellular organelle part;intracellular p…	4	3	3	12.3	11	11	56.381	0	8.1686	41846000	11	21.93	21.8719	23.2459	23.4325	23.5865	23.2893
+	0.962086	2.67676	Q61387	Q61387	Cytochrome c oxidase subunit 7A-related protein, mitochondrial	Cox7a2l	Color2 [DarkGray]	1	4	cell part;cytoplasmic part;intracellular membrane-bounded organelle;intracellular organelle;intracellular organelle part;intracellular part;membrane part;membrane-bounded organelle;mitochondrial membrane part;mitochondrial part;mitochondrial respiratory chain;mitochondrion;organelle;organelle part;respiratory chain	5	5	5	62.2	62.2	62.2	12.399	0	41.691	1379800000	25	26.7487	29.1366	28.9891	26.4705	23.5278	26.8458
+	3.5107	1.01511	Q61425	Q61425	Hydroxyacyl-coenzyme A dehydrogenase, mitochondrial	Hadh	Color2 [DarkGray]	1	4	cell part;cytoplasm;cytoplasmic part;intracellular membrane-bounded organelle;intracellular organelle;intracellular organelle lumen;intracellular organelle part;intracellular part;membrane;membrane-bounded organelle;membrane-enclosed lumen;mitochondrial inner membrane;mitochondrial matrix;mitochondrial membrane;mitochondrial part;mitochondrion;nuclear part;nucleoplasm;organelle;organelle inner me…	20	20	20	75.5	75.5	75.5	34.463	0	323.31	54654000000	240	33.5968	33.3976	33.4523	32.3608	32.46	32.5806
+	2.68713	-0.718336	Q61553	Q61553	Fascin	Fscn1	Color2 [DarkGray]	1	4	actin cytoskeleton;actin filament bundle;actomyosin;cell junction;cell part;cell projection;cytoplasm;cytoplasmic part;cytoskeletal part;cytoskeleton;cytosol;extracellular membrane-bounded organelle;extracellular organelle;extracellular region part;extracellular vesicular exosome;filopodium;intracellular non-membrane-bounded organelle;intracellular organelle;intracellular organelle part;intracell…	9	9	9	27	27	27	54.507	0	74.875	791720000	40	26.5517	26.554	26.4796	27.0644	27.3994	27.2766
+	2.97549	-1.32773	Q61554	Q61554	Fibrillin-1	Fbn1	Color2 [DarkGray]	1	4	basement membrane;extracellular matrix;extracellular matrix part;extracellular membrane-bounded organelle;extracellular organelle;extracellular region part;extracellular space;extracellular vesicular exosome;fibril;membrane-bounded organelle;membrane-bounded vesicle;microfibril;organelle;proteinaceous extracellular matrix;vesicle	81	81	77	38.9	38.9	37.8	312.3	0	323.31	15172000000	592	30.0951	30.3276	30.4623	31.7544	31.718	31.3958
+	1.11512	-1.69983	Q61576	Q61576	Peptidyl-prolyl cis-trans isomerase FKBP10	Fkbp10	Color2 [DarkGray]	1	4	cell part;cytoplasmic part;endoplasmic reticulum lumen;endoplasmic reticulum membrane;endoplasmic reticulum part;intracellular organelle lumen;intracellular organelle part;intracellular part;membrane;membrane part;membrane-enclosed lumen;organelle lumen;organelle membrane;organelle part	5	5	5	8.6	8.6	8.6	64.697	0	5.8006	211410000	5	22.5948	24.8304	23.4103	24.7808	25.8012	25.3531
+	2.45257	-2.93041	Q61581	Q61581	Insulin-like growth factor-binding protein 7	Igfbp7	Color2 [DarkGray]	1	4	extracellular membrane-bounded organelle;extracellular organelle;extracellular region part;extracellular space;extracellular vesicular exosome;membrane-bounded organelle;membrane-bounded vesicle;organelle;vesicle	5	5	5	24.9	24.9	24.9	28.969	0	16.532	103190000	10	21.4104	22.8019	21.5295	24.864	25.1244	24.5447
+	2.19773	0.563159	Q61595	Q61595	Kinectin	Ktn1	Color2 [DarkGray]	1	4	cell part;cytoplasmic part;endoplasmic reticulum;endoplasmic reticulum membrane;endoplasmic reticulum part;integral to membrane;intracellular membrane-bounded organelle;intracellular organelle;intracellular organelle part;intracellular part;intrinsic to membrane;membrane;membrane part;membrane-bounded organelle;organelle;organelle membrane;organelle part	18	18	18	19.4	19.4	19.4	152.59	0	61.121	731720000	42	27.1144	27.0848	27.1967	26.5099	26.4288	26.7676
+	3.35217	0.7421	Q61738	Q61738	Integrin alpha-7;Integrin alpha-7 heavy chain;Integrin alpha-7 light chain	Itga7	Color2 [DarkGray]	1	4	adherens junction;alpha7-beta1 integrin complex;anchoring junction;cell junction;cell part;cell-substrate adherens junction;cell-substrate junction;cytoplasm;integrin complex;intracellular part;macromolecular complex;membrane;membrane part;muscle tendon junction;neuromuscular junction;plasma membrane;plasma membrane part;protein complex;receptor complex;sarcolemma;synapse	18	18	18	22.5	22.5	22.5	129.33	0	63.027	1117500000	59	27.8115	27.7028	27.94	27.0494	27.0888	27.0898
+	1.86867	-0.549372	Q61768	Q61768	Kinesin-1 heavy chain	Kif5b	Color2 [DarkGray]	1	4	cell part;cell projection;cell projection part;ciliary rootlet;cilium part;cytoplasm;cytoplasmic membrane-bounded vesicle;cytoplasmic part;cytoplasmic vesicle;cytoskeletal part;cytosol;endocytic vesicle;intracellular membrane-bounded organelle;intracellular organelle;intracellular organelle part;intracellular part;kinesin complex;macromolecular complex;membrane;membrane-bounded organelle;membrane…	31	31	26	40	40	34.3	109.55	0	183.42	1588000000	107	27.5015	27.5678	27.7727	28.2734	28.2564	27.9604
+	3.24664	-1.33128	Q61937	Q61937	Nucleophosmin	Npm1	Color2 [DarkGray]	1	4	adherens junction;anchoring junction;cell junction;cell part;cell-substrate adherens junction;cell-substrate junction;centrosome;cytoplasm;cytoplasmic part;cytoskeletal part;cytosol;focal adhesion;granular component;intracellular membrane-bounded organelle;intracellular non-membrane-bounded organelle;intracellular organelle;intracellular organelle part;intracellular part;large ribosomal subunit;m…	9	9	9	33.9	33.9	33.9	32.56	0	119.58	1843900000	39	27.3509	27.2305	27.3029	28.5467	28.8779	28.4536
+	4.39102	-2.20993	Q62009;CON__Q2KJC7	Q62009	Periostin	Postn	Color2 [DarkGray]	1	4	cell part;cytoplasmic part;extracellular matrix;extracellular region part;extracellular space;Golgi apparatus part;intracellular organelle part;intracellular part;organelle part;proteinaceous extracellular matrix;trans-Golgi network	30	30	30	49.4	49.4	49.4	93.142	0	323.31	6017200000	102	28.2885	28.149	28.4333	30.5376	30.6127	30.3503
+	0.811323	1.99765	Q62048	Q62048	Astrocytic phosphoprotein PEA-15	Pea15	Color2 [DarkGray]	1	4	cell part;cytoplasm;cytoskeletal part;intracellular organelle part;intracellular part;macromolecular complex;microtubule associated complex;organelle part;protein complex	2	2	2	33.8	33.8	33.8	15.054	0	14.902	222860000	7	25.7319	24.8316	25.7785	23.0751	21.7651	25.5089
+	4.20762	-4.02148	Q62059	Q62059	Versican core protein	Vcan	Color2 [DarkGray]	1	4	cell part;extracellular matrix;extracellular region;extracellular region part;extracellular space;intracellular membrane-bounded organelle;intracellular organelle;intracellular part;membrane;membrane-bounded organelle;organelle;proteinaceous extracellular matrix	8	8	8	3.5	3.5	3.5	366.78	0	34.245	252910000	16	22.4879	21.8141	22.1294	25.9281	26.3262	26.2414
+	2.00353	-0.94494	Q62086	Q62086	Serum paraoxonase/arylesterase 2	Pon2	Color2 [DarkGray]	1	4	cell part;cytoplasmic part;extracellular region;intracellular membrane-bounded organelle;intracellular organelle;intracellular part;lysosome;lytic vacuole;membrane;membrane-bounded organelle;mitochondrion;nucleus;organelle;plasma membrane;vacuole	3	3	3	11.3	11.3	11.3	39.617	0	5.4255	123010000	9	23.3789	23.8304	23.7186	24.5255	24.8786	24.3586
+	2.85085	-0.684048	Q62167;P16381	Q62167;P16381	ATP-dependent RNA helicase DDX3X;Putative ATP-dependent RNA helicase Pl10	Ddx3x;D1Pas1	Color2 [DarkGray]	1	4	cell part;cytoplasm;cytoplasmic part;extracellular membrane-bounded organelle;extracellular organelle;extracellular region part;extracellular vesicular exosome;intracellular membrane-bounded organelle;intracellular non-membrane-bounded organelle;intracellular organelle;intracellular organelle part;intracellular part;macromolecular complex;membrane;membrane-bounded organelle;membrane-bounded vesic…	20	20	4	35.8	35.8	10.6	73.101	0	98.036	2336700000	106	28.1008	28.069	28.1304	28.9048	28.8277	28.6198
+	2.73772	-1.15457	Q62188	Q62188	Dihydropyrimidinase-related protein 3	Dpysl3	Color2 [DarkGray]	1	4	cell body;cell part;cell projection;cell projection part;cytoplasmic membrane-bounded vesicle;cytoplasmic part;cytoplasmic vesicle;cytoskeletal part;cytosol;exocytic vesicle;extracellular region part;extracellular space;filamentous actin;growth cone;intracellular membrane-bounded organelle;intracellular organelle;intracellular organelle part;intracellular part;lamellipodium;macromolecular complex…	25	25	20	72.1	72.1	61.9	61.936	0	257.17	5026100000	156	28.9344	28.6505	28.9922	30.1702	30.0846	29.786
+	1.54991	-0.613504	Q62219	Q62219	Transforming growth factor beta-1-induced transcript 1 protein	Tgfb1i1	Color2 [DarkGray]	1	4	adherens junction;anchoring junction;cell junction;cell part;cell-substrate adherens junction;cell-substrate junction;cytoplasm;cytoskeleton;extracellular matrix;extracellular region part;focal adhesion;intracellular;intracellular non-membrane-bounded organelle;intracellular organelle;intracellular organelle part;intracellular part;non-membrane-bounded organelle;nuclear matrix;nuclear part;organe…	6	6	6	16.9	16.9	16.9	50.1	0	10.612	162980000	15	24.1326	24.3106	24.3468	24.9395	25.1347	24.5562
+	3.43615	0.443373	Q62407	Q62407	Striated muscle-specific serine/threonine-protein kinase	Speg	Color2 [DarkGray]	1	4	cell part;intracellular membrane-bounded organelle;intracellular organelle;intracellular part;membrane-bounded organelle;nucleus;organelle	29	29	29	11.9	11.9	11.9	354.34	0	73.695	1024500000	98	27.5037	27.5635	27.5977	27.0625	27.1618	27.1105
+	1.82803	-0.520648	Q62426	Q62426	Cystatin-B	Cstb	Color2 [DarkGray]	1	4	cell part;cytoplasm;extracellular membrane-bounded organelle;extracellular organelle;extracellular region part;extracellular space;extracellular vesicular exosome;intracellular membrane-bounded organelle;intracellular non-membrane-bounded organelle;intracellular organelle;intracellular organelle part;intracellular part;membrane-bounded organelle;membrane-bounded vesicle;non-membrane-bounded organ…	3	3	3	39.8	39.8	39.8	11.045	0	13.409	271510000	25	25.1247	25.0379	25.1435	25.7696	25.7196	25.3789
+	1.41661	0.57467	Q62446	Q62446	Peptidyl-prolyl cis-trans isomerase FKBP3	Fkbp3	Color2 [DarkGray]	1	4	cell part;cytoplasmic part;endoplasmic reticulum membrane;endoplasmic reticulum part;intracellular membrane-bounded organelle;intracellular organelle;intracellular organelle part;intracellular part;membrane;membrane part;membrane-bounded organelle;nucleus;organelle;organelle membrane;organelle part	13	13	13	53.6	53.6	53.6	25.147	0	85.983	2083600000	87	28.5284	28.7455	28.6338	27.7186	28.3176	28.1475
+	3.08787	-0.925944	Q62465	Q62465	Synaptic vesicle membrane protein VAT-1 homolog	Vat1	Color2 [DarkGray]	1	4	cell part;cytoplasmic part;extracellular membrane-bounded organelle;extracellular organelle;extracellular region part;extracellular vesicular exosome;intracellular organelle part;intracellular part;membrane;membrane-bounded organelle;membrane-bounded vesicle;mitochondrial membrane;mitochondrial outer membrane;mitochondrial part;organelle;organelle membrane;organelle outer membrane;organelle part;…	12	12	12	37.4	37.4	37.4	43.096	0	58.197	856170000	53	26.4335	26.6203	26.2985	27.4138	27.2943	27.4221
+	1.96041	-0.759304	Q62523	Q62523	Zyxin	Zyx	Color2 [DarkGray]	1	4	actin filament bundle;actomyosin;adherens junction;anchoring junction;cell junction;cell part;cell-cell adherens junction;cell-cell junction;cell-substrate adherens junction;cell-substrate junction;cytoplasm;cytoskeletal part;focal adhesion;intracellular membrane-bounded organelle;intracellular organelle;intracellular organelle part;intracellular part;membrane-bounded organelle;nucleus;organelle;…	6	6	6	20.9	20.9	20.9	60.545	0	26.205	322960000	18	24.8931	25.4623	25.2561	25.9689	26.0148	25.9057
+	3.3876	0.437468	Q64105	Q64105	Sepiapterin reductase	Spr	Color2 [DarkGray]	1	4	cell part;cytoplasm;cytoplasmic part;extracellular membrane-bounded organelle;extracellular organelle;extracellular region part;extracellular vesicular exosome;intracellular membrane-bounded organelle;intracellular organelle;intracellular organelle part;intracellular part;membrane-bounded organelle;membrane-bounded vesicle;mitochondrion;nuclear part;nucleoplasm;organelle;organelle part;vesicle	11	11	11	55.2	55.2	55.2	27.883	0	55.505	1653000000	72	28.1964	28.2865	28.244	27.7728	27.7752	27.8664
+	1.2275	0.902629	Q64191	Q64191	N(4)-(beta-N-acetylglucosaminyl)-L-asparaginase;Glycosylasparaginase alpha chain;Glycosylasparaginase beta chain	Aga	Color2 [DarkGray]	1	4	cell part;cytoplasmic part;endoplasmic reticulum;extracellular membrane-bounded organelle;extracellular organelle;extracellular region part;extracellular vesicular exosome;intracellular membrane-bounded organelle;intracellular organelle;intracellular part;lysosome;lytic vacuole;membrane-bounded organelle;membrane-bounded vesicle;organelle;vacuole;vesicle	2	2	2	12.4	12.4	12.4	37.022	0.00075245	2.3325	79221000	5	24.2141	23.99	24.2716	22.8809	22.9635	23.9233
+	1.22117	-2.66222	Q64449	Q64449	C-type mannose receptor 2	Mrc2	Color2 [DarkGray]	1	4	adherens junction;anchoring junction;cell junction;cell part;cell surface;cell-substrate adherens junction;cell-substrate junction;focal adhesion;integral to membrane;intrinsic to membrane;membrane;membrane part;plasma membrane	7	7	7	6	6	6	167.07	0	27.243	150810000	8	24.392	22.3943	20.867	25.0552	25.3516	25.2331
+	1.48706	2.09146	Q64471	Q64471	Glutathione S-transferase theta-1	Gstt1	Color2 [DarkGray]	1	4	cell part;cytoplasmic part;cytosol;intracellular membrane-bounded organelle;intracellular organelle;intracellular part;membrane-bounded organelle;nucleus;organelle	2	2	2	11.2	11.2	11.2	27.374	0	4.3477	47768000	4	23.9065	23.3395	23.9809	20.7281	21.3968	22.8275
+	1.13854	1.46572	Q64521	Q64521	Glycerol-3-phosphate dehydrogenase, mitochondrial	Gpd2	Color2 [DarkGray]	1	4	cell part;cytoplasmic part;glycerol-3-phosphate dehydrogenase complex;intracellular membrane-bounded organelle;intracellular organelle;intracellular organelle part;intracellular part;macromolecular complex;membrane;membrane-bounded organelle;mitochondrial inner membrane;mitochondrial membrane;mitochondrial part;mitochondrion;organelle;organelle inner membrane;organelle membrane;organelle part;pro…	26	26	26	50.1	50.1	50.1	80.953	0	108.37	1286400000	72	29.2096	27.2817	27.7281	26.4034	26.9328	26.486
+	1.96452	-0.671379	Q64737	Q64737	Trifunctional purine biosynthetic protein adenosine-3;Phosphoribosylamine--glycine ligase;Phosphoribosylformylglycinamidine cyclo-ligase;Phosphoribosylglycinamide formyltransferase	Gart	Color2 [DarkGray]	1	4	cell part;cytoplasm;extracellular membrane-bounded organelle;extracellular organelle;extracellular region part;extracellular vesicular exosome;intracellular part;membrane-bounded organelle;membrane-bounded vesicle;organelle;vesicle	17	17	17	21.2	21.2	21.2	107.5	0	39.074	1944000000	58	27.925	28.1199	27.6153	28.5401	28.5237	28.6106
+	1.84751	0.586699	Q65CL1	Q65CL1	Catenin alpha-3	Ctnna3	Color2 [DarkGray]	1	4	adherens junction;anchoring junction;cell junction;cell part;cell projection;cell-cell adherens junction;cell-cell junction;cytoplasm;cytoskeleton;fascia adherens;intracellular non-membrane-bounded organelle;intracellular organelle;intracellular part;lamellipodium;non-membrane-bounded organelle;organelle	21	20	20	34.1	32.8	32.8	99.802	0	94.728	1208600000	55	27.8409	27.6739	28.0979	27.189	27.2457	27.4179
+	2.06121	-0.420657	Q68FD5	Q68FD5	Clathrin heavy chain 1	Cltc	Color2 [DarkGray]	1	4	adherens junction;anchoring junction;cell junction;cell part;cell-substrate adherens junction;cell-substrate junction;chromosomal part;clathrin coat;clathrin coat of coated pit;clathrin coat of trans-Golgi network vesicle;clathrin complex;clathrin vesicle coat;clathrin-coated vesicle;coated vesicle;cytoplasm;cytoplasmic membrane-bounded vesicle;cytoplasmic part;cytoplasmic vesicle;cytoplasmic ves…	72	72	72	51.9	51.9	51.9	191.55	0	323.31	16318000000	475	31.0845	30.9505	31.1866	31.6015	31.4632	31.4189
+	2.28387	-1.019	Q6DFW4	Q6DFW4	Nucleolar protein 58	Nop58	Color2 [DarkGray]	1	4	box C/D snoRNP complex;Cajal body;cell part;cytoplasm;intracellular membrane-bounded organelle;intracellular non-membrane-bounded organelle;intracellular organelle;intracellular organelle part;intracellular part;macromolecular complex;membrane;membrane-bounded organelle;non-membrane-bounded organelle;nuclear body;nuclear part;nucleolar part;nucleolus;nucleoplasm part;nucleus;organelle;organelle p…	9	9	9	21.5	21.5	21.5	60.342	0	21.056	272780000	23	24.753	24.6248	24.8517	25.4664	26.0619	25.7583
+	2.25791	-0.556078	Q6IRU2	Q6IRU2	Tropomyosin alpha-4 chain	Tpm4	Color2 [DarkGray]	1	4	actin filament bundle;actomyosin;adherens junction;anchoring junction;cell cortex part;cell junction;cell part;cell-substrate adherens junction;cell-substrate junction;cortical cytoskeleton;cytoplasm;cytoplasmic part;cytoskeletal part;cytoskeleton;extracellular membrane-bounded organelle;extracellular organelle;extracellular region part;extracellular vesicular exosome;focal adhesion;intracellular…	16	12	12	54.4	51.6	51.6	28.467	0	198.54	2474700000	77	28.2691	28.253	28.2819	28.6526	29.0048	28.8148
+	1.62868	-2.35835	Q6IRU5	Q6IRU5	Clathrin light chain B	Cltb	Color2 [DarkGray]	1	4	cell part;cell projection membrane;cell projection part;cilium membrane;cilium part;clathrin coat;clathrin coat of coated pit;clathrin coat of trans-Golgi network vesicle;clathrin vesicle coat;cytoplasm;cytoplasmic part;cytoplasmic vesicle part;Golgi apparatus part;intracellular membrane-bounded organelle;intracellular organelle;intracellular organelle part;intracellular part;macromolecular compl…	6	6	6	23.1	23.1	23.1	25.171	0	11.755	358670000	14	22.8086	24.7973	24.4941	26.6751	26.5754	25.9246
+	1.20012	1.15078	Q6NSR8	Q6NSR8	Probable aminopeptidase NPEPL1	Npepl1	Color2 [DarkGray]	1	4	cell part;cytoplasm;intracellular membrane-bounded organelle;intracellular organelle;intracellular part;membrane-bounded organelle;nucleus;organelle	4	4	4	12.4	12.4	12.4	55.939	0	10.505	110470000	7	24.9136	24.9496	24.7828	24.3669	22.867	23.9598
+	1.54173	-0.493437	Q6NZJ6;Q80XI3	Q6NZJ6	Eukaryotic translation initiation factor 4 gamma 1	Eif4g1	Color2 [DarkGray]	1	4	cell part;cytoplasm;cytoplasmic part;eukaryotic translation initiation factor 4F complex;intracellular part;macromolecular complex;membrane;protein complex	21	21	21	15.6	15.6	15.6	176.07	0	88.085	1021000000	75	27.1336	26.7262	27.1762	27.5064	27.4448	27.5651
+	2.49318	1.1601	Q6P3A8	Q6P3A8	2-oxoisovalerate dehydrogenase subunit beta, mitochondrial	Bckdhb	Color2 [DarkGray]	1	4	cell part;cytoplasmic part;dihydrolipoyl dehydrogenase complex;intracellular membrane-bounded organelle;intracellular organelle;intracellular organelle part;intracellular part;macromolecular complex;membrane;membrane-bounded organelle;mitochondrial alpha-ketoglutarate dehydrogenase complex;mitochondrial inner membrane;mitochondrial membrane;mitochondrial part;mitochondrial tricarboxylic acid cycl…	6	6	6	19	19	19	42.88	0	22.229	605250000	24	27.0953	26.8447	27.3542	25.7668	26.1431	25.9041
+	3.45545	-2.62761	Q6P542	Q6P542	ATP-binding cassette sub-family F member 1	Abcf1	Color2 [DarkGray]	1	4	cell part;cytoplasm;cytoplasmic part;envelope;intracellular non-membrane-bounded organelle;intracellular organelle;intracellular organelle part;intracellular part;macromolecular complex;membrane;non-membrane-bounded organelle;nuclear envelope;nuclear part;nucleoplasm;organelle;organelle envelope;organelle part;polysomal ribosome;ribonucleoprotein complex;ribosome	7	7	7	12.1	12.1	12.1	94.944	0	13.594	146280000	7	22.4915	22.9152	22.1181	25.0975	25.1076	25.2025
+	2.81652	1.01839	Q6P8J7;P30275	Q6P8J7	Creatine kinase S-type, mitochondrial	Ckmt2	Color2 [DarkGray]	1	4	cell part;cytoplasmic part;extracellular membrane-bounded organelle;extracellular organelle;extracellular region part;extracellular vesicular exosome;intracellular membrane-bounded organelle;intracellular organelle;intracellular organelle part;intracellular part;membrane;membrane-bounded organelle;membrane-bounded vesicle;mitochondrial inner membrane;mitochondrial membrane;mitochondrial part;mito…	25	25	25	63	63	63	47.473	0	323.31	131930000000	933	34.6183	34.8245	34.8286	33.5609	33.7085	33.9469
+	1.83938	0.623619	Q6PD03	Q6PD03	Serine/threonine-protein phosphatase 2A 56 kDa regulatory subunit alpha isoform	Ppp2r5a	Color2 [DarkGray]	1	4	cell part;chromosomal part;chromosome, centromeric region;contractile fiber part;cytoplasm;cytoplasmic part;cytosol;intracellular membrane-bounded organelle;intracellular organelle;intracellular organelle part;intracellular part;M band;macromolecular complex;membrane;membrane-bounded organelle;nucleus;organelle;organelle part;protein complex;protein phosphatase type 2A complex;protein serine/thre…	10	10	8	20.6	20.6	18.7	56.346	0	24.428	355660000	26	26.0786	26.1468	26.0986	25.2023	25.7116	25.5392
+	1.69696	-0.582205	Q6PDM2	Q6PDM2	Serine/arginine-rich splicing factor 1	Srsf1	Color2 [DarkGray]	1	4	catalytic step 2 spliceosome;cell part;cytoplasm;exon-exon junction complex;extracellular membrane-bounded organelle;extracellular organelle;extracellular region part;extracellular vesicular exosome;intracellular membrane-bounded organelle;intracellular organelle;intracellular organelle part;intracellular part;macromolecular complex;membrane-bounded organelle;membrane-bounded vesicle;nuclear body…	8	8	8	37.1	37.1	37.1	27.744	0	23.336	638370000	22	26.6154	26.1263	26.2391	26.9867	26.9208	26.8199
+	2.65627	-0.420214	Q6PHZ2;P11798	Q6PHZ2	Calcium/calmodulin-dependent protein kinase type II subunit delta	Camk2d	Color2 [DarkGray]	1	4	axon part;cell body;cell junction;cell part;cell projection part;cell-cell contact zone;cell-cell junction;cytoplasm;cytoplasmic part;endoplasmic reticulum;endoplasmic reticulum membrane;endoplasmic reticulum part;initial segment;intercalated disc;intracellular membrane-bounded organelle;intracellular organelle;intracellular organelle part;intracellular part;membrane;membrane part;membrane-bounde…	14	14	10	32.7	32.7	23.2	56.369	0	99.218	2618500000	81	28.4172	28.3719	28.5628	28.8374	28.8951	28.88
+	1.17965	0.689145	Q6PIE5;Q6PIC6;Q9WV27	Q6PIE5	Sodium/potassium-transporting ATPase subunit alpha-2	Atp1a2	Color2 [DarkGray]	1	4	caveola;cell part;cell projection;cell projection part;cytoplasm;cytoplasmic part;dendritic spine;endoplasmic reticulum;endosome;Golgi apparatus;integral to membrane;intracellular membrane-bounded organelle;intracellular organelle;intracellular part;intrinsic to membrane;macromolecular complex;membrane;membrane part;membrane raft;membrane-bounded organelle;myelin sheath;neuron projection;neuron s…	37	22	21	41.6	24.3	23.2	112.22	0	138.21	2436600000	104	28.8175	29.0019	28.8409	27.6666	28.3948	28.5316
+	1.18829	0.847553	Q6URW6	Q6URW6	Myosin-14	Myh14	Color2 [DarkGray]	1	4	actin filament bundle;actomyosin;axon;brush border;cell part;cell projection;cell projection part;cytoplasm;cytoskeletal part;extracellular membrane-bounded organelle;extracellular organelle;extracellular region part;extracellular vesicular exosome;growth cone;intracellular organelle part;intracellular part;macromolecular complex;membrane;membrane-bounded organelle;membrane-bounded vesicle;myelin…	25	17	17	15.4	11.8	11.8	228.58	0	51.23	455640000	29	26.1281	26.4709	26.9602	25.2433	26.0429	25.7305
+	3.28249	0.844507	Q6ZQ73	Q6ZQ73	Cullin-associated NEDD8-dissociated protein 2	Cand2	Color2 [DarkGray]	1	4	cell part;intracellular;intracellular membrane-bounded organelle;intracellular organelle;intracellular part;membrane-bounded organelle;nucleus;organelle	23	23	23	25.3	25.3	25.3	135.63	0	124.75	1510600000	102	28.2133	28.2961	28.3752	27.3146	27.5035	27.533
+	2.85493	-1.12023	Q6ZWX6	Q6ZWX6	Eukaryotic translation initiation factor 2 subunit 1	Eif2s1	Color2 [DarkGray]	1	4	cell part;cytoplasm;cytoplasmic part;eukaryotic 48S preinitiation complex;eukaryotic translation initiation factor 2 complex;eukaryotic translation initiation factor 2B complex;extracellular membrane-bounded organelle;extracellular organelle;extracellular region part;extracellular vesicular exosome;intracellular membrane-bounded organelle;intracellular non-membrane-bounded organelle;intracellular…	19	19	19	63.5	63.5	63.5	36.108	0	128.5	1438700000	56	27.267	26.9751	27.0574	28.3924	28.2587	28.0091
+	1.98466	1.08235	Q70KF4	Q70KF4	Cardiomyopathy-associated protein 5	Cmya5	Color2 [DarkGray]	1	4	cell part;contractile fiber part;costamere;cytoplasmic part;intracellular part;M band;organelle part;perinuclear region of cytoplasm	13	13	13	5.9	5.9	5.9	413.04	0	24.458	1213700000	26	27.8965	28.1937	28.1441	26.5711	27.1152	27.3009
+	1.25632	1.92705	Q71RI9	Q71RI9	Kynurenine--oxoglutarate transaminase 3	Ccbl2	Color2 [DarkGray]	1	4	cell part;cytoplasmic part;intracellular membrane-bounded organelle;intracellular organelle;intracellular part;membrane-bounded organelle;mitochondrion;organelle	7	7	7	19.1	19.1	19.1	51.126	0	16.953	204000000	15	25.7438	25.6581	25.5463	22.287	24.4451	24.435
+	3.23193	0.702968	Q78IK4	Q78IK4	MICOS complex subunit Mic27	Apool	Color2 [DarkGray]	1	4	cell part;cytoplasmic part;integral to membrane;intracellular membrane-bounded organelle;intracellular organelle;intracellular organelle part;intracellular part;intrinsic to membrane;membrane;membrane part;membrane-bounded organelle;mitochondrial inner membrane;mitochondrial membrane;mitochondrial part;mitochondrion;organelle;organelle inner membrane;organelle membrane;organelle part	14	14	14	60.4	60.4	60.4	29.26	0	90.94	2998600000	94	29.1478	29.2651	29.2513	28.417	28.5115	28.6268
+	1.02319	2.33798	Q78J03	Q78J03	Methionine-R-sulfoxide reductase B2, mitochondrial	Msrb2	Color2 [DarkGray]	1	4	cell part;cytoplasmic part;intracellular membrane-bounded organelle;intracellular organelle;intracellular part;membrane-bounded organelle;mitochondrion;organelle	8	8	8	53.1	53.1	53.1	19.157	0	17.404	383750000	22	26.6414	26.489	26.621	22.1025	25.317	25.318
+	3.57644	-0.395392	Q78ZA7	Q78ZA7	Nucleosome assembly protein 1-like 4	Nap1l4	Color2 [DarkGray]	1	4	cell part;intracellular membrane-bounded organelle;intracellular organelle;intracellular part;membrane-bounded organelle;nucleus;organelle	9	9	8	29.6	29.6	26.9	42.679	0	56.781	1052900000	50	27.1484	27.1209	27.096	27.5725	27.4751	27.5038
+	1.81376	0.509425	Q791T5	Q791T5	Mitochondrial carrier homolog 1	Mtch1	Color2 [DarkGray]	1	4	cell part;cytoplasmic part;integral to membrane;intracellular membrane-bounded organelle;intracellular organelle;intracellular organelle part;intracellular part;intrinsic to membrane;membrane;membrane part;membrane-bounded organelle;mitochondrial inner membrane;mitochondrial membrane;mitochondrial part;mitochondrion;organelle;organelle inner membrane;organelle membrane;organelle part	5	5	5	17.2	17.2	17.2	41.565	0	14.852	428140000	18	26.2017	26.3402	26.4681	25.9421	25.9098	25.6298
+	3.73616	0.531337	Q791V5	Q791V5	Mitochondrial carrier homolog 2	Mtch2	Color2 [DarkGray]	1	4	cell part;cytoplasmic part;extracellular membrane-bounded organelle;extracellular organelle;extracellular region part;extracellular vesicular exosome;integral to membrane;intracellular membrane-bounded organelle;intracellular organelle;intracellular organelle part;intracellular part;intrinsic to membrane;membrane;membrane part;membrane-bounded organelle;membrane-bounded vesicle;mitochondrial inne…	13	13	13	58.4	58.4	58.4	33.499	0	185.9	7448100000	158	30.3774	30.455	30.4449	29.8781	29.8498	29.9555
+	1.79785	-0.862782	Q7M6Y3;Q61548	Q7M6Y3	Phosphatidylinositol-binding clathrin assembly protein	Picalm	Color2 [DarkGray]	1	4	AP-2 adaptor complex;AP-type membrane coat adaptor complex;cell body;cell part;clathrin adaptor complex;coated pit;cytoplasmic part;cytoplasmic vesicle part;Golgi apparatus;intracellular;intracellular membrane-bounded organelle;intracellular organelle;intracellular organelle part;intracellular part;macromolecular complex;membrane;membrane part;membrane-bounded organelle;neuronal cell body;nucleus…	10	10	10	19.5	19.5	19.5	71.543	0	31.495	1228800000	24	27.1307	26.8311	27.0765	28.2579	27.7427	27.6262
+	3.71931	-0.362689	Q7TMK9	Q7TMK9	Heterogeneous nuclear ribonucleoprotein Q	Syncrip	Color2 [DarkGray]	1	4	catalytic step 2 spliceosome;cell part;CRD-mediated mRNA stability complex;cytoplasm;cytoplasmic part;histone pre-mRNA 3'end processing complex;intracellular organelle part;intracellular part;macromolecular complex;membrane;nuclear part;organelle part;protein complex;ribonucleoprotein complex;spliceosomal complex	15	15	15	28.7	28.7	28.7	69.632	0	112.1	1585000000	90	27.7598	27.7464	27.7106	28.075	28.082	28.1479
+	1.37782	-0.756245	Q7TNS2	Q7TNS2	MICOS complex subunit Mic10	Minos1	Color2 [DarkGray]	1	4	cell part;cytoplasmic part;integral to membrane;intracellular membrane-bounded organelle;intracellular organelle;intracellular organelle part;intracellular part;intrinsic to membrane;membrane;membrane part;membrane-bounded organelle;mitochondrial inner membrane;mitochondrial membrane;mitochondrial part;mitochondrion;organelle;organelle inner membrane;organelle membrane;organelle part	2	2	2	19.7	19.7	19.7	8.5669	0	4.822	566730000	10	25.9308	26.3884	25.6526	26.9814	26.7623	26.4968
+	2.54976	-0.784897	Q7TPR4	Q7TPR4	Alpha-actinin-1	Actn1	Color2 [DarkGray]	1	4	actin filament bundle;actomyosin;adherens junction;anchoring junction;brush border;cell cortex part;cell junction;cell part;cell projection;cell projection part;cell-cell adherens junction;cell-cell junction;cell-substrate adherens junction;cell-substrate junction;contractile fiber part;cortical actin cytoskeleton;cortical cytoskeleton;cytoplasm;cytoplasmic membrane-bounded vesicle;cytoplasmic pa…	55	36	29	65.1	50.9	42	103.07	0	323.31	13460000000	233	30.3926	30.562	30.552	31.4196	31.3657	31.076
+	2.49081	-1.02027	Q7TPV4	Q7TPV4	Myb-binding protein 1A	Mybbp1a	Color2 [DarkGray]	1	4	cell part;cytoplasm;intracellular membrane-bounded organelle;intracellular non-membrane-bounded organelle;intracellular organelle;intracellular organelle part;intracellular part;macromolecular complex;membrane;membrane-bounded organelle;NLS-dependent protein nuclear import complex;non-membrane-bounded organelle;nuclear part;nucleocytoplasmic shuttling complex;nucleolus;nucleus;organelle;organelle…	15	15	15	16.2	16.2	16.2	152.04	0	43.657	475440000	21	25.6699	25.2665	25.7867	26.5533	26.5633	26.6672
+	3.04543	-1.07718	Q7TPW1	Q7TPW1	Nexilin	Nexn	Color2 [DarkGray]	1	4	adherens junction;anchoring junction;cell junction;cell part;cell-substrate adherens junction;cell-substrate junction;contractile fiber part;cytoplasmic part;cytoskeleton;focal adhesion;intracellular non-membrane-bounded organelle;intracellular organelle;intracellular part;non-membrane-bounded organelle;organelle;organelle part;Z disc	17	17	17	28.5	28.5	28.5	72.107	0	65.534	1564400000	61	27.1392	27.39	27.1846	28.4882	28.2928	28.1643
+	3.46749	0.587488	Q7TQ48	Q7TQ48	Sarcalumenin	Srl	Color2 [DarkGray]	1	4	cell part;cytoplasmic part;endoplasmic reticulum lumen;endoplasmic reticulum part;intracellular organelle lumen;intracellular organelle part;intracellular part;membrane-enclosed lumen;organelle lumen;organelle part;sarcoplasmic reticulum lumen	36	36	36	48.9	48.9	48.9	99.183	0	323.31	70493000000	604	33.6026	33.7428	33.7081	33.1242	33.0375	33.1294
+	1.10998	-2.46466	Q80SZ7	Q80SZ7	Guanine nucleotide-binding protein G(I)/G(S)/G(O) subunit gamma-5	Gng5	Color2 [DarkGray]	1	4	cell part;extracellular membrane-bounded organelle;extracellular organelle;extracellular region part;extracellular vesicular exosome;extrinsic to internal side of plasma membrane;extrinsic to membrane;extrinsic to plasma membrane;heterotrimeric G-protein complex;intracellular part;macromolecular complex;membrane part;membrane-bounded organelle;membrane-bounded vesicle;organelle;plasma membrane pa…	4	4	4	77.9	77.9	77.9	7.3184	0	18.162	220990000	21	25.1449	21.8252	22.275	25.6543	25.3544	25.6303
+	3.17946	-1.25144	Q80UM3;Q9DBB4	Q80UM3	N-alpha-acetyltransferase 15, NatA auxiliary subunit	Naa15	Color2 [DarkGray]	1	4	cell part;cytoplasm;cytoplasmic part;extracellular membrane-bounded organelle;extracellular organelle;extracellular region part;extracellular vesicular exosome;intracellular membrane-bounded organelle;intracellular organelle;intracellular organelle part;intracellular part;macromolecular complex;membrane;membrane-bounded organelle;membrane-bounded vesicle;NatA complex;N-terminal protein acetyltran…	13	13	13	15.6	15.6	15.6	100.96	0	49.244	362230000	30	24.8568	25.1784	24.9752	26.1442	26.4347	26.1859
+	1.98968	0.501357	Q80X50	Q80X50	Ubiquitin-associated protein 2-like	Ubap2l	Color2 [DarkGray]	1	4	Ada2/Gcn5/Ada3 transcription activator complex;cell part;histone acetyltransferase complex;intracellular organelle part;intracellular part;macromolecular complex;nuclear part;nucleoplasm part;organelle part;PcG protein complex;protein complex	6	6	6	9.5	9.5	9.5	116.8	0	17.137	142300000	15	24.8045	24.5527	24.8769	24.2827	24.3008	24.1466
+	3.5238	-2.38089	Q80XB4	Q80XB4	Nebulin-related-anchoring protein	Nrap	Color2 [DarkGray]	1	4	adherens junction;anchoring junction;cell junction;cell part;cell-cell adherens junction;cell-cell junction;cell-substrate adherens junction;cell-substrate junction;contractile fiber;cytoplasmic part;fascia adherens;intracellular non-membrane-bounded organelle;intracellular organelle;intracellular part;muscle tendon junction;myofibril;non-membrane-bounded organelle;organelle	71	71	71	50.9	50.9	50.9	195.75	0	323.31	4344600000	218	27.4701	27.7299	27.807	29.7019	30.1915	30.2562
+	2.46164	-2.81806	Q80XN0	Q80XN0	D-beta-hydroxybutyrate dehydrogenase, mitochondrial	Bdh1	Color2 [DarkGray]	1	4	cell part;cytoplasm;cytoplasmic part;intracellular membrane-bounded organelle;intracellular organelle;intracellular organelle lumen;intracellular organelle part;intracellular part;membrane;membrane-bounded organelle;membrane-enclosed lumen;mitochondrial inner membrane;mitochondrial matrix;mitochondrial membrane;mitochondrial part;mitochondrion;nuclear part;nucleoplasm;organelle;organelle inner me…	9	9	9	35.3	35.3	35.3	38.299	0	69.209	288370000	18	24.1011	23.6685	22.7741	26.7806	25.9967	26.2207
+	1.21565	-1.789	Q80YX1	Q80YX1	Tenascin	Tnc	Color2 [DarkGray]	1	4	adherens junction;anchoring junction;basement membrane;cell junction;cell part;cell-substrate adherens junction;cell-substrate junction;extracellular matrix;extracellular matrix part;extracellular region;extracellular region part;extracellular space;focal adhesion;interstitial matrix;membrane;proteinaceous extracellular matrix	4	4	4	2.5	2.5	2.5	231.8	0	11.48	68380000	4	21.3147	22.6197	23.5803	23.8697	24.4265	24.5855
+	1.22997	1.26014	Q811D0;P70175;Q91XM9	Q811D0	Disks large homolog 1	Dlg1	Color2 [DarkGray]	1	4	adherens junction;alpha-amino-3-hydroxy-5-methyl-4-isoxazolepropionic acid selective glutamate receptor complex;anchoring junction;axon part;basal lamina;basolateral plasma membrane;cell body;cell junction;cell part;cell projection membrane;cell projection part;cell-cell adherens junction;cell-cell junction;cytoplasm;cytoplasmic part;cytoskeletal part;dendritic shaft;endoplasmic reticulum;endopla…	6	6	6	9	9	9	100.12	0	10.832	90877000	9	24.2052	24.4001	24.3359	23.3907	22.1106	23.6594
+	0.979425	1.30812	Q811I0	Q811I0	ATP synthase mitochondrial F1 complex assembly factor 1	Atpaf1	Color2 [DarkGray]	1	4	cell part;cytoplasmic part;intracellular membrane-bounded organelle;intracellular organelle;intracellular part;membrane-bounded organelle;mitochondrion;organelle	4	4	4	17.3	17.3	17.3	36.354	0	10.354	176020000	12	25.2346	25.2766	25.3777	22.7421	24.5374	24.6851
+	2.70366	0.544434	Q8BFP9	Q8BFP9	[Pyruvate dehydrogenase (acetyl-transferring)] kinase isozyme 1, mitochondrial	Pdk1	Color2 [DarkGray]	1	4	cell part;cytoplasmic part;intracellular membrane-bounded organelle;intracellular organelle;intracellular organelle part;intracellular part;macromolecular complex;membrane;membrane-bounded organelle;mitochondrial part;mitochondrial pyruvate dehydrogenase complex;mitochondrion;organelle;organelle part;plasma membrane;protein complex;pyruvate dehydrogenase complex	15	15	13	43.5	43.5	38.9	48.994	0	48.982	1370800000	62	27.9473	27.9622	28.1645	27.4591	27.5369	27.4447
+	1.81408	1.8948	Q8BFZ1	Q8BFZ1	Trans-2,3-enoyl-CoA reductase-like	Tecrl	Color2 [DarkGray]	1	4	cell part;cytoplasm;integral to membrane;intracellular part;intrinsic to membrane;membrane part	3	3	3	10.8	10.8	10.8	41.892	0	10.971	175860000	9	25.4236	25.7362	25.7866	22.8767	23.9992	24.3861
+	2.05974	0.648936	Q8BG51	Q8BG51	Mitochondrial Rho GTPase 1	Rhot1	Color2 [DarkGray]	1	4	cell part;cytoplasmic part;integral to membrane;integral to mitochondrial membrane;integral to mitochondrial outer membrane;integral to organelle membrane;intracellular membrane-bounded organelle;intracellular organelle;intracellular organelle part;intracellular part;intrinsic to membrane;intrinsic to mitochondrial outer membrane;intrinsic to organelle membrane;membrane;membrane part;membrane-bou…	6	5	5	8.7	7	7	72.241	0	8.3698	290060000	43	25.6081	25.3577	25.6055	24.8471	25.0725	24.7048
+	1.18145	1.64965	Q8BGA9	Q8BGA9	Mitochondrial inner membrane protein OXA1L	Oxa1l	Color2 [DarkGray]	1	4	cell part;cytoplasmic part;integral to membrane;integral to mitochondrial membrane;integral to organelle membrane;intracellular membrane-bounded organelle;intracellular organelle;intracellular organelle part;intracellular part;intrinsic to membrane;intrinsic to organelle membrane;macromolecular complex;membrane;membrane part;membrane-bounded organelle;mitochondrial inner membrane;mitochondrial me…	2	2	2	4.4	4.4	4.4	48.219	0	4.6636	100510000	4	24.4942	24.6834	24.4956	22.5614	21.9902	24.1727
+	2.4382	0.638428	Q8BGC4	Q8BGC4	Zinc-binding alcohol dehydrogenase domain-containing protein 2	Zadh2	Color2 [DarkGray]	1	4	cell part;cytoplasmic part;intracellular membrane-bounded organelle;intracellular organelle;intracellular part;membrane-bounded organelle;microbody;mitochondrion;organelle;peroxisome	9	9	9	29.2	29.2	29.2	40.528	0	18.752	730480000	47	27.2626	27.2147	27.0113	26.3848	26.5747	26.6139
+	2.29482	-0.483311	Q8BGQ7	Q8BGQ7	Alanine--tRNA ligase, cytoplasmic	Aars	Color2 [DarkGray]	1	4	cell part;cytoplasm;extracellular membrane-bounded organelle;extracellular organelle;extracellular region part;extracellular vesicular exosome;intracellular part;membrane;membrane-bounded organelle;membrane-bounded vesicle;organelle;vesicle	12	12	12	19.7	19.7	19.7	106.91	0	56.191	411940000	30	25.6805	25.6345	25.671	25.9951	26.2914	26.1496
+	1.88879	0.479177	Q8BH59	Q8BH59	Calcium-binding mitochondrial carrier protein Aralar1	Slc25a12	Color2 [DarkGray]	1	4	cell part;cytoplasmic part;integral to membrane;intracellular membrane-bounded organelle;intracellular organelle;intracellular organelle part;intracellular part;intrinsic to membrane;membrane;membrane part;membrane-bounded organelle;mitochondrial inner membrane;mitochondrial membrane;mitochondrial part;mitochondrion;myelin sheath;organelle;organelle inner membrane;organelle membrane;organelle part	36	36	32	60.1	60.1	54.7	74.569	0	323.31	19719000000	332	31.6664	31.8049	31.9983	31.2732	31.3008	31.458
+	2.37117	0.707237	Q8BH95	Q8BH95	Enoyl-CoA hydratase, mitochondrial	Echs1	Color2 [DarkGray]	1	4	cell part;cytoplasmic part;extracellular membrane-bounded organelle;extracellular organelle;extracellular region part;extracellular vesicular exosome;intracellular membrane-bounded organelle;intracellular organelle;intracellular organelle lumen;intracellular organelle part;intracellular part;membrane-bounded organelle;membrane-bounded vesicle;membrane-enclosed lumen;mitochondrial matrix;mitochond…	17	17	17	69.3	69.3	69.3	31.474	0	289.73	15011000000	169	31.5399	31.4458	31.5975	30.7995	30.637	31.025
+	2.72887	-2.35382	Q8BH97	Q8BH97	Reticulocalbin-3	Rcn3	Color2 [DarkGray]	1	4	cell part;cytoplasmic part;endoplasmic reticulum lumen;endoplasmic reticulum part;intracellular organelle lumen;intracellular organelle part;intracellular part;membrane-enclosed lumen;organelle lumen;organelle part	6	6	6	23.5	23.5	23.5	38.001	0	23.455	128410000	12	22.6434	22.1974	22.5139	24.2213	25.1511	25.0438
+	1.91032	0.48538	Q8BIJ6	Q8BIJ6	Isoleucine--tRNA ligase, mitochondrial	Iars2	Color2 [DarkGray]	1	4	cell part;cytoplasm;cytoplasmic part;cytosol;intracellular membrane-bounded organelle;intracellular organelle;intracellular organelle lumen;intracellular organelle part;intracellular part;membrane-bounded organelle;membrane-enclosed lumen;mitochondrial matrix;mitochondrial part;mitochondrion;organelle;organelle lumen;organelle part	26	26	26	34.8	34.8	34.8	112.8	0	127.55	3694600000	167	29.3004	29.4212	29.53	28.7519	29.0102	29.0332
+	1.16167	0.972378	Q8BIJ7	Q8BIJ7	RUN and FYVE domain-containing protein 1	Rufy1	Color2 [DarkGray]	1	4	cell part;cytoplasm;cytoplasmic part;early endosome membrane;endosomal part;endosome membrane;intracellular membrane-bounded organelle;intracellular organelle;intracellular organelle part;intracellular part;membrane;membrane-bounded organelle;nucleus;organelle;organelle membrane;organelle part	3	3	3	5.1	5.1	5.1	80.376	0	3.1113	33591000	3	22.9021	23.4234	23.4168	22.6733	21.5696	22.5823
+	1.87437	0.737944	Q8BJ03	Q8BJ03	Cytochrome c oxidase assembly protein COX15 homolog	Cox15	Color2 [DarkGray]	1	4	cell part;cytochrome complex;cytoplasmic part;integral to membrane;intracellular membrane-bounded organelle;intracellular organelle;intracellular organelle part;intracellular part;intrinsic to membrane;macromolecular complex;membrane;membrane part;membrane-bounded organelle;mitochondrial inner membrane;mitochondrial membrane;mitochondrial part;mitochondrion;organelle;organelle inner membrane;orga…	3	3	3	9.4	9.4	9.4	45.852	0	6.7784	53303000	9	24.1698	23.6739	24.1983	23.3336	23.2048	23.2897
+	2.93681	-0.785163	Q8BKC5;Q8BIV3	Q8BKC5	Importin-5	Ipo5	Color2 [DarkGray]	1	4	cell part;cytoplasm;cytoplasmic part;Golgi apparatus;intracellular membrane-bounded organelle;intracellular organelle;intracellular organelle part;intracellular part;membrane;membrane-bounded organelle;nuclear membrane;nuclear part;nucleoplasm;nucleus;organelle;organelle membrane;organelle part	34	34	34	42.4	42.4	42.4	123.59	0	252.66	3398800000	163	28.5993	28.4653	28.5678	29.433	29.3955	29.1593
+	1.19654	0.888658	Q8BKY8	Q8BKY8	Transcription termination factor 2, mitochondrial	Mterf2	Color2 [DarkGray]	1	4	cell part;cytoplasmic part;intracellular membrane-bounded organelle;intracellular non-membrane-bounded organelle;intracellular organelle;intracellular organelle lumen;intracellular organelle part;intracellular part;membrane-bounded organelle;membrane-enclosed lumen;mitochondrial matrix;mitochondrial nucleoid;mitochondrial part;mitochondrion;non-membrane-bounded organelle;nucleoid;organelle;organe…	5	5	5	13.8	13.8	13.8	43.452	0	7.5174	69892000	7	24.153	24.106	23.6897	22.5213	23.1474	23.6139
+	2.26732	0.586137	Q8BKZ9	Q8BKZ9	Pyruvate dehydrogenase protein X component, mitochondrial	Pdhx	Color2 [DarkGray]	1	4	cell part;cytoplasmic part;intracellular membrane-bounded organelle;intracellular organelle;intracellular organelle lumen;intracellular organelle part;intracellular part;membrane-bounded organelle;membrane-enclosed lumen;mitochondrial matrix;mitochondrial part;mitochondrion;organelle;organelle lumen;organelle part	16	16	16	48.7	48.7	48.7	53.998	0	134.55	4447200000	176	29.6748	29.8146	29.6669	28.9499	29.2728	29.1752
+	1.22047	-1.83869	Q8BMA6	Q8BMA6	Signal recognition particle subunit SRP68	Srp68	Color2 [DarkGray]	1	4	adherens junction;anchoring junction;cell junction;cell part;cell-substrate adherens junction;cell-substrate junction;cytoplasm;cytoplasmic part;endoplasmic reticulum;focal adhesion;intracellular membrane-bounded organelle;intracellular non-membrane-bounded organelle;intracellular organelle;intracellular organelle part;intracellular part;macromolecular complex;membrane-bounded organelle;non-membr…	10	10	10	20.3	20.3	20.3	70.573	0	20.207	194040000	8	24.7875	23.1261	22.502	24.9992	25.6525	25.28
+	2.39214	1.07336	Q8BMF3;Q99KE1	Q8BMF3	NADP-dependent malic enzyme, mitochondrial	Me3	Color2 [DarkGray]	1	4	cell part;cytoplasmic part;intracellular membrane-bounded organelle;intracellular organelle;intracellular organelle lumen;intracellular organelle part;intracellular part;membrane-bounded organelle;membrane-enclosed lumen;mitochondrial matrix;mitochondrial part;mitochondrion;organelle;organelle lumen;organelle part	14	14	14	30	30	30	67.098	0	82.65	906620000	41	27.6222	27.5384	27.7643	26.2413	26.803	26.6604
+	2.29393	0.634315	Q8BMF4	Q8BMF4	Dihydrolipoyllysine-residue acetyltransferase component of pyruvate dehydrogenase complex, mitochondrial	Dlat	Color2 [DarkGray]	1	4	cell part;cytoplasmic part;intracellular membrane-bounded organelle;intracellular organelle;intracellular organelle part;intracellular part;macromolecular complex;membrane-bounded organelle;mitochondrial part;mitochondrial pyruvate dehydrogenase complex;mitochondrion;myelin sheath;organelle;organelle part;protein complex;pyruvate dehydrogenase complex	22	22	22	41.7	41.7	41.7	67.941	0	308.05	38500000000	287	32.7544	32.843	32.9476	32.0977	32.133	32.4114
+	3.01551	-1.18864	Q8BMK4	Q8BMK4	Cytoskeleton-associated protein 4	Ckap4	Color2 [DarkGray]	1	4	cell part;cell surface;cytoplasmic part;cytoskeleton;endoplasmic reticulum;endoplasmic reticulum membrane;endoplasmic reticulum part;extracellular membrane-bounded organelle;extracellular organelle;extracellular region part;extracellular vesicular exosome;integral to membrane;intracellular membrane-bounded organelle;intracellular non-membrane-bounded organelle;intracellular organelle;intracellula…	22	22	22	39.8	39.8	39.8	63.691	0	128.15	3100400000	112	28.2723	28.1808	27.9929	29.1519	29.5302	29.33
+	1.70907	-0.863648	Q8BMP6	Q8BMP6	Golgi resident protein GCP60	Acbd3	Color2 [DarkGray]	1	4	cell part;cytoplasmic part;Golgi apparatus;Golgi apparatus part;Golgi membrane;integral to membrane;intracellular membrane-bounded organelle;intracellular organelle;intracellular organelle part;intracellular part;intrinsic to membrane;membrane;membrane part;membrane-bounded organelle;mitochondrion;organelle;organelle membrane;organelle part	3	3	3	10.7	10.7	10.7	60.18	0	30.914	128220000	6	23.6386	24.1248	23.5949	24.9267	24.3969	24.6257
+	2.71622	0.79413	Q8BMS1	Q8BMS1	Trifunctional enzyme subunit alpha, mitochondrial;Long-chain enoyl-CoA hydratase;Long chain 3-hydroxyacyl-CoA dehydrogenase	Hadha	Color2 [DarkGray]	1	4	cell part;cytoplasmic part;fatty acid beta-oxidation multienzyme complex;intracellular membrane-bounded organelle;intracellular non-membrane-bounded organelle;intracellular organelle;intracellular organelle part;intracellular part;macromolecular complex;membrane;membrane-bounded organelle;mitochondrial inner membrane;mitochondrial membrane;mitochondrial nucleoid;mitochondrial part;mitochondrion;n…	46	46	46	68.7	68.7	68.7	82.669	0	323.31	224120000000	885	35.4157	35.4092	35.489	34.7367	34.4314	34.7634
+	2.21945	0.472459	Q8BMS4	Q8BMS4	Ubiquinone biosynthesis O-methyltransferase, mitochondrial	Coq3	Color2 [DarkGray]	1	4	cell part;cytoplasmic part;intracellular membrane-bounded organelle;intracellular organelle;intracellular organelle part;intracellular part;membrane;membrane-bounded organelle;mitochondrial inner membrane;mitochondrial membrane;mitochondrial part;mitochondrion;organelle;organelle inner membrane;organelle membrane;organelle part	6	6	6	26.5	26.5	26.5	40.956	0	55.093	1342200000	38	27.9298	28.0742	27.9299	27.3573	27.5629	27.5965
+	1.55572	0.57602	Q8BP40	Q8BP40	Lysophosphatidic acid phosphatase type 6	Acp6	Color2 [DarkGray]	1	4	cell part;cytoplasm;cytoplasmic part;intracellular membrane-bounded organelle;intracellular organelle;intracellular part;membrane-bounded organelle;mitochondrion;organelle	8	8	8	25.1	25.1	25.1	47.624	0	27.45	377150000	21	26.3936	26.1506	26.0046	25.3982	25.8373	25.5852
+	4.98269	-3.38269	Q8BPB5	Q8BPB5	EGF-containing fibulin-like extracellular matrix protein 1	Efemp1	Color2 [DarkGray]	1	4	extracellular matrix;extracellular membrane-bounded organelle;extracellular organelle;extracellular region part;extracellular space;extracellular vesicular exosome;membrane-bounded organelle;membrane-bounded vesicle;organelle;proteinaceous extracellular matrix;vesicle	8	8	8	26.6	26.6	26.6	54.952	0	38.727	245070000	20	22.7098	22.4197	22.8016	26.0116	25.9595	26.1079
+	2.71751	-1.95392	Q8BR92	Q8BR92	Paralemmin-2	Palm2	Color2 [DarkGray]	1	4	cell part;membrane;plasma membrane	3	3	3	11.7	11.7	11.7	42.095	0	6.6139	51970000	6	22.397	21.6512	21.7416	24.0153	24.0156	23.6208
+	3.63607	0.553888	Q8BTY1	Q8BTY1	Kynurenine--oxoglutarate transaminase 1	Ccbl1	Color2 [DarkGray]	1	4	cell part;cytoplasm;intracellular organelle part;intracellular part;nuclear part;nucleoplasm;organelle part	9	9	9	29.7	29.7	29.7	47.563	0	30.353	377880000	42	26.1174	26.1879	26.2666	25.6197	25.6516	25.6389
+	2.94816	-0.686378	Q8BU85	Q8BU85	Methionine-R-sulfoxide reductase B3, mitochondrial	Msrb3	Color2 [DarkGray]	1	4	cell part;cytoplasmic part;endoplasmic reticulum;intracellular membrane-bounded organelle;intracellular organelle;intracellular part;membrane-bounded organelle;mitochondrion;organelle	4	4	4	26.1	26.1	26.1	26.832	0	9.9802	182590000	15	24.464	24.4127	24.4414	25.0329	25.2869	25.0574
+	2.89178	0.909529	Q8BW75	Q8BW75	Amine oxidase [flavin-containing] B	Maob	Color2 [DarkGray]	1	4	cell part;cytoplasmic part;extracellular membrane-bounded organelle;extracellular organelle;extracellular region part;extracellular vesicular exosome;integral to membrane;intracellular membrane-bounded organelle;intracellular organelle;intracellular organelle part;intracellular part;intrinsic to membrane;membrane;membrane part;membrane-bounded organelle;membrane-bounded vesicle;mitochondrial inne…	10	10	10	23.8	23.8	23.8	58.557	0	43.485	764990000	35	27.2905	27.184	27.5386	26.411	26.3673	26.5062
+	3.58481	-1.68735	Q8BWB1	Q8BWB1	Synaptopodin 2-like protein	Synpo2l	Color2 [DarkGray]	1	4	cell part;contractile fiber part;cytoplasmic part;cytoskeleton;intracellular membrane-bounded organelle;intracellular non-membrane-bounded organelle;intracellular organelle;intracellular part;membrane-bounded organelle;non-membrane-bounded organelle;nucleus;organelle;organelle part;Z disc	29	29	29	39.9	39.9	39.9	102.95	0	302.87	5578400000	204	28.4206	28.8317	28.6213	30.3321	30.4239	30.1796
+	2.67172	0.575935	Q8BWF0	Q8BWF0	Succinate-semialdehyde dehydrogenase, mitochondrial	Aldh5a1	Color2 [DarkGray]	1	4	cell part;cytoplasmic part;intracellular membrane-bounded organelle;intracellular organelle;intracellular part;membrane-bounded organelle;mitochondrion;organelle	15	15	15	34	34	34	55.968	0	62.733	1411400000	41	27.9389	28.1714	28.1139	27.4189	27.5153	27.5622
+	3.69685	0.856845	Q8BWT1	Q8BWT1	3-ketoacyl-CoA thiolase, mitochondrial	Acaa2	Color2 [DarkGray]	1	4	cell part;cytoplasmic part;extracellular membrane-bounded organelle;extracellular organelle;extracellular region part;extracellular vesicular exosome;intracellular membrane-bounded organelle;intracellular organelle;intracellular organelle part;intracellular part;membrane;membrane-bounded organelle;membrane-bounded vesicle;mitochondrial inner membrane;mitochondrial membrane;mitochondrial part;mito…	32	32	32	76.6	76.6	76.6	41.829	0	323.31	101620000000	620	34.3246	34.3897	34.2367	33.3636	33.5189	33.498
+	2.26787	0.527025	Q8BX70	Q8BX70	Vacuolar protein sorting-associated protein 13C	Vps13c	Color2 [DarkGray]	1	4	cell part;extracellular membrane-bounded organelle;extracellular organelle;extracellular region part;extracellular vesicular exosome;extrinsic to membrane;intracellular;membrane part;membrane-bounded organelle;membrane-bounded vesicle;organelle;vesicle	5	5	5	1.7	1.7	1.7	420.08	0	8.5882	83318000	11	24.0705	23.9252	23.9619	23.2894	23.5661	23.5211
+	1.90905	-1.05172	Q8BXK9;Q8BHB9	Q8BXK9	Chloride intracellular channel protein 5	Clic5	Color2 [DarkGray]	1	4	actin cytoskeleton;cell part;cell projection;chloride channel complex;cytoplasm;cytoplasmic part;cytoskeletal part;cytoskeleton;extracellular membrane-bounded organelle;extracellular organelle;extracellular region part;extracellular vesicular exosome;Golgi apparatus;intracellular membrane-bounded organelle;intracellular non-membrane-bounded organelle;intracellular organelle;intracellular organell…	7	7	7	45.4	45.4	45.4	28.287	0	41.839	589650000	22	25.7952	25.9598	25.7039	27.0461	27.1542	26.4137
+	1.40743	1.00685	Q8BXV2	Q8BXV2	BRI3-binding protein	Bri3bp	Color2 [DarkGray]	1	4	cell part;cytoplasmic part;integral to membrane;intracellular membrane-bounded organelle;intracellular organelle;intracellular organelle part;intracellular part;intrinsic to membrane;membrane;membrane part;membrane-bounded organelle;mitochondrial membrane;mitochondrial outer membrane;mitochondrial part;mitochondrion;organelle;organelle membrane;organelle outer membrane;organelle part;outer membra…	2	2	2	9.1	9.1	9.1	28.263	0.0036088	1.9877	60487000	4	23.4934	23.3448	23.6276	21.9551	22.4205	23.0695
+	2.05678	2.06712	Q8BY89	Q8BY89	Choline transporter-like protein 2	Slc44a2	Color2 [DarkGray]	1	4	cell part;cytoplasmic part;extracellular membrane-bounded organelle;extracellular organelle;extracellular region part;extracellular vesicular exosome;integral to membrane;intracellular organelle part;intracellular part;intrinsic to membrane;lysosomal membrane;membrane;membrane part;membrane-bounded organelle;membrane-bounded vesicle;organelle;organelle membrane;organelle part;vacuolar membrane;va…	6	6	6	10.1	10.1	10.1	80.109	0	8.0091	328880000	10	26.6752	26.1263	26.5553	23.9149	24.0618	25.1787
+	1.97128	1.3719	Q8BZJ7	Q8BZJ7	DCN1-like protein 2	Dcun1d2	Color2 [DarkGray]	1	4		2	2	2	11.2	11.2	11.2	30.068	0	5.2027	70516000	6	23.8941	24.418	24.3891	22.9117	22.4031	23.2707
+	2.04384	-1.3162	Q8C052	Q8C052	Microtubule-associated protein 1S;MAP1S heavy chain;MAP1S light chain	Map1s	Color2 [DarkGray]	1	4	cell body;cell junction;cell part;cell projection;cytoplasm;cytoplasmic part;cytoskeletal part;cytoskeleton;cytosol;dendrite;intracellular membrane-bounded organelle;intracellular non-membrane-bounded organelle;intracellular organelle;intracellular organelle part;intracellular part;macromolecular complex;membrane-bounded organelle;microtubule;microtubule cytoskeleton;neuron projection;neuronal ce…	2	2	2	2.3	2.3	2.3	102.94	0.00075216	2.3322	23984000	2	21.3959	21.7762	21.1674	22.6594	23.1732	22.4555
+	4.78275	-1.26911	Q8C1B7	Q8C1B7	Septin-11	2011-09-01	Color2 [DarkGray]	1	4	actin filament bundle;actomyosin;axon;cell junction;cell part;cell projection;cell projection part;cytoplasm;cytoskeletal part;dendritic spine;extracellular membrane-bounded organelle;extracellular organelle;extracellular region part;extracellular vesicular exosome;intracellular organelle part;intracellular part;membrane-bounded organelle;membrane-bounded vesicle;neuron projection;neuron spine;or…	7	7	5	23.4	23.4	16.7	49.694	0	31.32	457600000	23	25.3336	25.336	25.3583	26.5191	26.6959	26.6203
+	1.75907	0.569248	Q8C5H8	Q8C5H8	NAD kinase 2, mitochondrial	Nadk2	Color2 [DarkGray]	1	4	cell part;cytoplasmic part;intracellular membrane-bounded organelle;intracellular organelle;intracellular part;membrane-bounded organelle;mitochondrion;organelle	6	6	6	17.3	17.3	17.3	50.858	0	14.535	210280000	29	25.3283	25.3347	25.3162	24.4977	25.0011	24.7728
+	2.73415	-1.69887	Q8C650	Q8C650	Septin-10	2010-09-01	Color2 [DarkGray]	1	4	cell part;cytoplasm;cytoskeleton;intracellular non-membrane-bounded organelle;intracellular organelle;intracellular part;non-membrane-bounded organelle;organelle	4	3	3	12.6	10.6	10.6	52.422	0	9.8992	68543000	4	22.0911	22.0306	21.9195	24.1181	23.3358	23.6839
+	1.39917	0.782027	Q8C7H1	Q8C7H1	Methylmalonic aciduria type A homolog, mitochondrial	Mmaa	Color2 [DarkGray]	1	4	cell part;cytoplasmic part;intracellular membrane-bounded organelle;intracellular organelle;intracellular part;membrane-bounded organelle;mitochondrion;organelle	3	3	3	11.1	11.1	11.1	45.932	0	10.378	121980000	13	24.3709	24.6254	24.8838	23.6885	23.5769	24.2686
+	2.94077	0.560418	Q8C8R3	Q8C8R3	Ankyrin-2	Ank2	Color2 [DarkGray]	1	4	A band;apical plasma membrane;basolateral plasma membrane;cell junction;cell part;cell projection;cell-cell contact zone;cell-cell junction;contractile fiber part;costamere;cytoplasm;cytoplasmic part;cytoskeleton;integral to membrane;integral to plasma membrane;intercalated disc;intracellular;intracellular non-membrane-bounded organelle;intracellular organelle;intracellular part;intrinsic to memb…	35	35	27	12.9	12.9	11.1	426.26	0	140.5	2215300000	152	28.6928	28.7394	28.7348	28.0575	28.1447	28.2835
+	4.11672	-3.07645	Q8CC35	Q8CC35	Synaptopodin	Synpo	Color2 [DarkGray]	1	4	actin cytoskeleton;actin filament bundle;actomyosin;cell junction;cell part;cell projection;cell projection part;cell-cell junction;cytoplasm;cytoskeletal part;cytoskeleton;dendrite;dendritic spine;intracellular non-membrane-bounded organelle;intracellular organelle;intracellular organelle part;intracellular part;membrane;neuron projection;neuron spine;non-membrane-bounded organelle;occluding jun…	7	7	7	11.5	11.5	11.5	99.55	0	10.185	209710000	14	22.2612	22.1998	22.7371	25.4517	25.6129	25.3629
+	2.69964	0.478633	Q8CC88	Q8CC88	von Willebrand factor A domain-containing protein 8	Vwa8	Color2 [DarkGray]	1	4	cell part;cytoplasmic part;extracellular region;intracellular membrane-bounded organelle;intracellular organelle;intracellular part;membrane-bounded organelle;mitochondrion;organelle	61	61	61	39.4	39.4	39.4	213.42	0	218.04	5194700000	242	29.8685	29.9293	29.9481	29.3324	29.4299	29.5476
+	1.30759	0.650864	Q8CEI1	Q8CEI1	BolA-like protein 3	Bola3	Color2 [DarkGray]	1	4	extracellular region	2	2	2	33.6	33.6	33.6	12.228	0	15.861	70629000	8	23.7433	23.7454	23.871	22.8015	23.0308	23.5749
+	2.67758	0.389652	Q8CGY6	Q8CGY6	Protein unc-45 homolog B	Unc45b	Color2 [DarkGray]	1	4	cell part;cytoplasm;cytoplasmic part;cytosol;intracellular part	31	31	31	40.6	40.6	40.6	103.64	0	138.04	2058200000	110	28.5499	28.5003	28.6025	28.0697	28.2207	28.1935
+	1.16323	0.799996	Q8CH18	Q8CH18	Cell division cycle and apoptosis regulator protein 1	Ccar1	Color2 [DarkGray]	1	4	cell part;cytoplasmic part;intracellular organelle part;intracellular part;membrane-enclosed lumen;nuclear envelope lumen;nuclear part;organelle envelope lumen;organelle part;perinuclear region of cytoplasm	3	3	3	2.7	2.7	2.7	132.06	0	3.1259	46537000	3	23.067	23.2559	23.4458	22.0429	22.276	23.0499
+	1.76314	-0.860608	Q8CHH9	Q8CHH9	Septin-8	2008-09-01	Color2 [DarkGray]	1	4	cell part;cytoplasm;cytoskeleton;intracellular non-membrane-bounded organelle;intracellular organelle;intracellular part;myelin sheath;non-membrane-bounded organelle;organelle	8	8	8	30.5	30.5	30.5	49.812	0	49.573	334480000	17	25.1511	24.911	25.5044	26.3072	25.9962	25.845
+	2.13786	0.422045	Q8CHP8	Q8CHP8	Phosphoglycolate phosphatase	Pgp	Color2 [DarkGray]	1	4		8	8	8	34	34	34	34.54	0	53.183	654940000	38	26.847	27.0064	26.8385	26.5783	26.4878	26.3595
+	3.18484	1.16383	Q8CHS7	Q8CHS7	Dehydrogenase/reductase SDR family member 7C	Dhrs7c	Color2 [DarkGray]	1	4	cell part;cytoplasmic part;endoplasmic reticulum membrane;endoplasmic reticulum part;extracellular region;intracellular organelle part;intracellular part;longitudinal sarcoplasmic reticulum;membrane;membrane part;organelle membrane;organelle part;sarcoplasmic reticulum membrane	9	9	9	35	35	35	34.467	0	27.95	648140000	35	27.1132	27.141	27.3097	25.8771	25.9695	26.2258
+	3.11292	-0.804335	Q8CHW4	Q8CHW4	Translation initiation factor eIF-2B subunit epsilon	Eif2b5	Color2 [DarkGray]	1	4	cell part;cytoplasm;cytoplasmic part;eukaryotic translation initiation factor 2B complex;intracellular membrane-bounded organelle;intracellular organelle;intracellular part;macromolecular complex;membrane-bounded organelle;nucleus;organelle;protein complex	5	5	5	7	7	7	80.085	0	9.0001	140250000	9	23.9225	23.8738	24.0282	24.7946	24.5996	24.8433
+	2.31084	0.38654	Q8CI94	Q8CI94	Glycogen phosphorylase, brain form	Pygb	Color2 [DarkGray]	1	4	axon;cell part;cell projection;cytoplasm;extracellular membrane-bounded organelle;extracellular organelle;extracellular region part;extracellular vesicular exosome;intracellular part;membrane;membrane-bounded organelle;membrane-bounded vesicle;neuron projection;organelle;vesicle	47	36	36	58.5	47.6	47.6	96.729	0	323.31	15721000000	370	31.4472	31.3595	31.5671	31.0054	31.1055	31.1032
+	2.59501	-0.639015	Q8CIE6	Q8CIE6	Coatomer subunit alpha;Xenin;Proxenin	Copa	Color2 [DarkGray]	1	4	cell part;COPI vesicle coat;cytoplasm;cytoplasmic part;cytoplasmic vesicle part;extracellular membrane-bounded organelle;extracellular organelle;extracellular region part;extracellular space;extracellular vesicular exosome;Golgi apparatus part;intracellular organelle part;intracellular part;macromolecular complex;membrane;membrane coat;membrane part;membrane-bounded organelle;membrane-bounded ves…	30	30	30	33.5	33.5	33.5	138.43	0	115.23	1444100000	89	27.5064	27.2436	27.5173	27.9992	28.1045	28.0806
+	5.13501	0.438722	Q8JZN5	Q8JZN5	Acyl-CoA dehydrogenase family member 9, mitochondrial	Acad9	Color2 [DarkGray]	1	4	cell part;cell projection;cytoplasmic part;dendrite;intracellular membrane-bounded organelle;intracellular organelle;intracellular part;membrane-bounded organelle;mitochondrion;neuron projection;nucleus;organelle	22	22	22	44.3	44.3	44.3	68.721	0	126.27	4397300000	135	29.6366	29.6423	29.6761	29.1978	29.224	29.217
+	2.27722	0.406387	Q8JZQ2	Q8JZQ2	AFG3-like protein 2	Afg3l2	Color2 [DarkGray]	1	4	cell part;cytoplasmic part;integral to membrane;intracellular membrane-bounded organelle;intracellular organelle;intracellular organelle part;intracellular part;intrinsic to membrane;membrane;membrane part;membrane-bounded organelle;mitochondrial inner membrane;mitochondrial membrane;mitochondrial part;mitochondrion;organelle;organelle inner membrane;organelle membrane;organelle part	28	27	26	38.2	37.2	36.2	89.518	0	188.81	2606300000	136	28.8653	28.8151	28.9673	28.3987	28.4388	28.5909
+	1.98647	-0.602915	Q8JZQ9	Q8JZQ9	Eukaryotic translation initiation factor 3 subunit B	Eif3b	Color2 [DarkGray]	1	4	cell part;cytoplasm;cytoplasmic part;eukaryotic 43S preinitiation complex;eukaryotic 48S preinitiation complex;eukaryotic translation initiation factor 3 complex;eukaryotic translation initiation factor 3 complex, eIF3m;extracellular membrane-bounded organelle;extracellular organelle;extracellular region part;extracellular vesicular exosome;intracellular organelle part;intracellular part;macromol…	19	19	19	27.9	27.9	27.9	91.369	0	66.811	1242200000	83	27.1588	27.1087	27.4656	27.7772	27.9889	27.7757
+	1.63407	0.742371	Q8K009;Q8R0Y6	Q8K009	Mitochondrial 10-formyltetrahydrofolate dehydrogenase	Aldh1l2	Color2 [DarkGray]	1	4	cell part;cytoplasmic part;extracellular membrane-bounded organelle;extracellular organelle;extracellular region part;extracellular vesicular exosome;intracellular membrane-bounded organelle;intracellular organelle;intracellular part;membrane-bounded organelle;membrane-bounded vesicle;mitochondrion;organelle;vesicle	14	14	14	20.6	20.6	20.6	101.59	0	33.099	310040000	26	26.0637	25.9555	25.95	24.889	25.5962	25.2569
+	1.14487	0.879605	Q8K010	Q8K010	5-oxoprolinase	Oplah	Color2 [DarkGray]	1	4		10	10	10	10.3	10.3	10.3	137.61	0	14.139	138740000	17	25.0618	24.6979	24.8535	23.3498	24.5348	24.0898
+	2.157	0.899492	Q8K0Z7	Q8K0Z7	Translational activator of cytochrome c oxidase 1	Taco1	Color2 [DarkGray]	1	4	cell part;cytoplasmic part;intracellular membrane-bounded organelle;intracellular organelle;intracellular organelle part;intracellular part;membrane-bounded organelle;mitochondrion;nuclear part;nucleoplasm;nucleus;organelle;organelle part	8	8	8	39.5	39.5	39.5	32.314	0	112.8	1480100000	49	28.1932	28.156	28.5267	27.1457	27.4394	27.5923
+	1.972	0.436625	Q8K2C6	Q8K2C6	NAD-dependent protein deacylase sirtuin-5, mitochondrial	Sirt5	Color2 [DarkGray]	1	4	cell part;cytoplasmic part;cytosol;intracellular membrane-bounded organelle;intracellular organelle;intracellular organelle lumen;intracellular organelle part;intracellular part;membrane;membrane-bounded organelle;membrane-enclosed lumen;mitochondrial inner membrane;mitochondrial intermembrane space;mitochondrial matrix;mitochondrial membrane;mitochondrial part;mitochondrion;nucleus;organelle;org…	12	12	12	44.8	44.8	44.8	34.134	0	54.739	738260000	35	27.0215	27.259	26.9814	26.5793	26.7273	26.6454
+	2.41753	0.515017	Q8K2M0	Q8K2M0	39S ribosomal protein L38, mitochondrial	Mrpl38	Color2 [DarkGray]	1	4	cell part;cytoplasmic part;intracellular membrane-bounded organelle;intracellular non-membrane-bounded organelle;intracellular organelle;intracellular organelle part;intracellular part;macromolecular complex;membrane-bounded organelle;mitochondrial part;mitochondrial ribosome;mitochondrion;non-membrane-bounded organelle;organellar ribosome;organelle;organelle part;ribonucleoprotein complex;riboso…	7	7	7	26.3	26.3	26.3	45.029	0	14.837	206960000	17	25.1832	25.3408	25.4166	24.8586	24.8394	24.6975
+	0.863205	-1.32114	Q8K2T4	Q8K2T4	Ubiquinol-cytochrome-c reductase complex assembly factor 3	Uqcc3	Color2 [DarkGray]	1	4	cell part;cytoplasmic part;integral to membrane;intracellular organelle part;intracellular part;intrinsic to membrane;membrane;membrane part;mitochondrial inner membrane;mitochondrial membrane;mitochondrial part;organelle inner membrane;organelle membrane;organelle part	2	2	2	22.5	22.5	22.5	9.5839	0	4.8009	50637000	4	21.3395	23.7822	22.2733	23.7631	23.7794	23.816
+	2.61782	0.921635	Q8K370	Q8K370	Acyl-CoA dehydrogenase family member 10	Acad10	Color2 [DarkGray]	1	4	cell part;cytoplasmic part;intracellular membrane-bounded organelle;intracellular organelle;intracellular part;membrane-bounded organelle;mitochondrion;organelle	13	13	13	12.3	12.3	12.3	118.98	0	54.477	1588900000	48	28.2929	28.4419	28.4847	27.2485	27.5511	27.6549
+	2.91574	0.739619	Q8K3J1	Q8K3J1	NADH dehydrogenase [ubiquinone] iron-sulfur protein 8, mitochondrial	Ndufs8	Color2 [DarkGray]	1	4	cell part;cytoplasmic part;intracellular membrane-bounded organelle;intracellular organelle;intracellular organelle part;intracellular part;macromolecular complex;membrane part;membrane-bounded organelle;mitochondrial membrane part;mitochondrial part;mitochondrial respiratory chain complex I;mitochondrion;NADH dehydrogenase complex;organelle;organelle part;protein complex;respiratory chain comple…	9	9	9	49.1	49.1	49.1	24.038	0	64.64	12147000000	121	31.2807	31.1401	31.0686	30.4059	30.32	30.5447
+	1.73147	0.525223	Q8K4F5	Q8K4F5	Alpha/beta hydrolase domain-containing protein 11	Abhd11	Color2 [DarkGray]	1	4	cell part;cytoplasmic part;intracellular membrane-bounded organelle;intracellular organelle;intracellular part;membrane-bounded organelle;mitochondrion;organelle	6	6	6	30.6	30.6	30.6	33.56	0	34.038	914030000	45	27.4054	27.4312	27.3796	26.685	26.8132	27.1423
+	2.33008	-1.4586	Q8K4G1	Q8K4G1	Latent-transforming growth factor beta-binding protein 4	Ltbp4	Color2 [DarkGray]	1	4	extracellular matrix;extracellular membrane-bounded organelle;extracellular organelle;extracellular region part;extracellular space;extracellular vesicular exosome;membrane-bounded organelle;membrane-bounded vesicle;organelle;proteinaceous extracellular matrix;vesicle	22	22	22	20.5	20.5	20.5	178.64	0	87.92	966340000	73	26.2065	25.8416	26.6811	27.7927	27.7697	27.5425
+	2.45496	-0.42141	Q8K4L3	Q8K4L3	Supervillin	Svil	Color2 [DarkGray]	1	4	actin cytoskeleton;adherens junction;anchoring junction;cell division site part;cell junction;cell part;cell projection;cell-substrate adherens junction;cell-substrate junction;cleavage furrow;contractile fiber part;costamere;cytoplasm;cytoplasmic part;cytoskeletal part;cytoskeleton;focal adhesion;intracellular membrane-bounded organelle;intracellular non-membrane-bounded organelle;intracellular …	37	37	37	25.6	25.6	25.6	243.16	0	99.695	1089600000	90	27.0802	27.2657	27.1023	27.5877	27.6217	27.503
+	1.51222	1.62404	Q8QZR5	Q8QZR5	Alanine aminotransferase 1	Gpt	Color2 [DarkGray]	1	4	cell part;cytoplasm;extracellular membrane-bounded organelle;extracellular organelle;extracellular region part;extracellular vesicular exosome;intracellular part;membrane-bounded organelle;membrane-bounded vesicle;organelle;vesicle	5	5	4	11.3	11.3	9.7	55.142	0	28.399	150440000	14	25.6689	25.2859	25.5617	24.635	22.9809	24.0284
+	3.30803	0.649244	Q8QZT1	Q8QZT1	Acetyl-CoA acetyltransferase, mitochondrial	Acat1	Color2 [DarkGray]	1	4	cell part;cytoplasmic part;extracellular membrane-bounded organelle;extracellular organelle;extracellular region part;extracellular vesicular exosome;intracellular membrane-bounded organelle;intracellular organelle;intracellular organelle lumen;intracellular organelle part;intracellular part;membrane;membrane-bounded organelle;membrane-bounded vesicle;membrane-enclosed lumen;mitochondrial inner m…	25	25	25	68.4	68.4	68.4	44.816	0	323.31	41414000000	328	32.8485	32.9886	33.0341	32.2527	32.3481	32.3228
+	2.62371	-0.433741	Q8QZY1	Q8QZY1	Eukaryotic translation initiation factor 3 subunit L	Eif3l	Color2 [DarkGray]	1	4	cell part;cytoplasmic part;eukaryotic 43S preinitiation complex;eukaryotic 48S preinitiation complex;eukaryotic translation initiation factor 3 complex;fibrillar center;intracellular non-membrane-bounded organelle;intracellular organelle;intracellular organelle part;intracellular part;macromolecular complex;membrane;non-membrane-bounded organelle;nuclear part;nucleolar part;nucleolus;nucleoplasm;…	15	15	15	27.7	27.7	27.7	66.612	0	69.251	788630000	54	26.7031	26.6626	26.6458	27.1311	27.1939	26.9877
+	1.75519	-0.828231	Q8R050;Q149F3	Q8R050	Eukaryotic peptide chain release factor GTP-binding subunit ERF3A	Gspt1	Color2 [DarkGray]	1	4	cell part;cytoplasm;intracellular part	9	9	9	14.5	14.5	14.5	68.625	0	22.362	298640000	25	24.9048	24.708	25.4061	25.7565	25.8372	25.9099
+	2.96819	2.17207	Q8R0N6	Q8R0N6	Hydroxyacid-oxoacid transhydrogenase, mitochondrial	Adhfe1	Color2 [DarkGray]	1	4	cell part;cytoplasmic part;intracellular membrane-bounded organelle;intracellular organelle;intracellular part;membrane-bounded organelle;mitochondrion;organelle	9	9	9	27.5	27.5	27.5	49.937	0	63.368	721780000	25	28.105	27.258	27.4544	25.4751	25.4355	25.3906
+	1.49949	-0.531005	Q8R0X7	Q8R0X7	Sphingosine-1-phosphate lyase 1	Sgpl1	Color2 [DarkGray]	1	4	cell part;cytoplasmic part;endoplasmic reticulum;endoplasmic reticulum membrane;endoplasmic reticulum part;integral to membrane;intracellular membrane-bounded organelle;intracellular organelle;intracellular organelle part;intracellular part;intrinsic to membrane;membrane;membrane part;membrane-bounded organelle;organelle;organelle membrane;organelle part	2	2	2	4	4	4	63.676	0	4.6135	35727000	5	22.5505	22.4573	22.6391	23.3325	23.1102	22.7973
+	1.81662	2.91252	Q8R0Y8	Q8R0Y8	Mitochondrial coenzyme A transporter SLC25A42	Slc25a42	Color2 [DarkGray]	1	4	cell part;cytoplasmic part;integral to membrane;intracellular membrane-bounded organelle;intracellular organelle;intracellular organelle part;intracellular part;intrinsic to membrane;membrane;membrane part;membrane-bounded organelle;mitochondrial inner membrane;mitochondrial membrane;mitochondrial part;mitochondrion;nucleus;organelle;organelle inner membrane;organelle membrane;organelle part	9	9	9	37.7	37.7	37.7	35.24	0	48.35	460380000	32	27.1093	26.9328	27.1031	24.418	22.783	25.2066
+	2.19825	0.715334	Q8R164	Q8R164	Valacyclovir hydrolase	Bphl	Color2 [DarkGray]	1	4	cell part;cytoplasmic part;extracellular membrane-bounded organelle;extracellular organelle;extracellular region part;extracellular vesicular exosome;intracellular membrane-bounded organelle;intracellular organelle;intracellular part;membrane-bounded organelle;membrane-bounded vesicle;mitochondrion;organelle;vesicle	8	8	8	37.1	37.1	37.1	32.851	0	49.096	899520000	57	27.514	27.5007	27.4347	26.5609	26.723	27.0194
+	3.98939	-0.619409	Q8R1B4	Q8R1B4	Eukaryotic translation initiation factor 3 subunit C	Eif3c	Color2 [DarkGray]	1	4	cell part;cytoplasmic part;eukaryotic 43S preinitiation complex;eukaryotic 48S preinitiation complex;eukaryotic translation initiation factor 3 complex;eukaryotic translation initiation factor 3 complex, eIF3m;intracellular part;macromolecular complex;protein complex;ribonucleoprotein complex;translation preinitiation complex	17	17	17	18.2	18.2	18.2	105.53	0	62.694	1313600000	74	27.312	27.2896	27.3144	27.8471	27.9525	27.9745
+	3.59324	1.47369	Q8R1G2	Q8R1G2	Carboxymethylenebutenolidase homolog	Cmbl	Color2 [DarkGray]	1	4	cell part;cytoplasmic part;cytosol;extracellular membrane-bounded organelle;extracellular organelle;extracellular region part;extracellular vesicular exosome;intracellular part;membrane-bounded organelle;membrane-bounded vesicle;organelle;vesicle	5	5	5	24.5	24.5	24.5	27.902	0	14.432	338350000	26	26.4059	26.4217	26.2547	24.7208	24.8511	25.0893
+	3.26805	-0.763238	Q8R1Q8	Q8R1Q8	Cytoplasmic dynein 1 light intermediate chain 1	Dync1li1	Color2 [DarkGray]	1	4	cell part;centrosome;chromosomal part;condensed chromosome kinetochore;cytoplasm;cytoplasmic dynein complex;cytoplasmic part;cytoskeletal part;dynein complex;intracellular non-membrane-bounded organelle;intracellular organelle;intracellular organelle part;intracellular part;kinetochore;macromolecular complex;membrane;microtubule;microtubule associated complex;microtubule organizing center;non-mem…	15	15	14	36.7	36.7	34.2	56.614	0	42.279	719640000	70	26.2658	26.2597	26.4793	27.0865	27.067	27.141
+	3.1846	0.660957	Q8R1S0	Q8R1S0	Ubiquinone biosynthesis monooxygenase COQ6, mitochondrial	Coq6	Color2 [DarkGray]	1	4	cell part;cell projection;cytoplasmic part;Golgi apparatus;intracellular membrane-bounded organelle;intracellular organelle;intracellular organelle part;intracellular part;membrane;membrane-bounded organelle;mitochondrial inner membrane;mitochondrial membrane;mitochondrial part;mitochondrion;organelle;organelle inner membrane;organelle membrane;organelle part	13	13	13	32.1	32.1	32.1	51.392	0	88.052	2243600000	93	28.7727	28.7721	28.7939	27.9908	28.2245	28.1405
+	1.8091	0.684398	Q8R2G4	Q8R2G4	Ecto-ADP-ribosyltransferase 3	Art3	Color2 [DarkGray]	1	4	anchored to membrane;cell part;extracellular membrane-bounded organelle;extracellular organelle;extracellular region part;extracellular vesicular exosome;intrinsic to membrane;membrane;membrane part;membrane-bounded organelle;membrane-bounded vesicle;organelle;plasma membrane;vesicle	15	15	15	52	52	52	42.014	0	97.249	1557300000	81	28.1435	28.3482	28.3311	27.9014	27.4439	27.4242
+	1.56105	-0.776618	Q8R2Y2	Q8R2Y2	Cell surface glycoprotein MUC18	Mcam	Color2 [DarkGray]	1	4	adherens junction;anchoring junction;cell junction;cell part;cell-substrate adherens junction;cell-substrate junction;external side of plasma membrane;extracellular region part;extracellular space;focal adhesion;integral to membrane;intracellular membrane-bounded organelle;intracellular organelle;intracellular part;intrinsic to membrane;membrane;membrane part;membrane-bounded organelle;nucleus;or…	10	10	10	19.4	19.4	19.4	71.545	0	27.139	614940000	23	26.5534	25.913	25.8493	26.7989	26.9446	26.9021
+	1.79034	0.481163	Q8R3F5	Q8R3F5	Malonyl-CoA-acyl carrier protein transacylase, mitochondrial	Mcat	Color2 [DarkGray]	1	4	cell part;cytoplasmic part;intracellular membrane-bounded organelle;intracellular organelle;intracellular part;membrane-bounded organelle;mitochondrion;organelle	7	7	7	23.4	23.4	23.4	41.928	0	10.885	352510000	19	25.9342	25.8881	26.1563	25.6813	25.4644	25.3894
+	1.94039	1.99269	Q8R3V5	Q8R3V5	Endophilin-B2	Sh3glb2	Color2 [DarkGray]	1	4	cell part;cytoplasm;intracellular membrane-bounded organelle;intracellular organelle;intracellular organelle part;intracellular part;membrane-bounded organelle;nuclear part;nucleoplasm;nucleus;organelle;organelle part	4	4	4	14.5	14.5	14.5	44.503	0	12.472	85837000	6	24.6667	24.0964	24.9526	21.8425	22.8402	23.0548
+	2.40319	0.631784	Q8R4N0	Q8R4N0	Citrate lyase subunit beta-like protein, mitochondrial	Clybl	Color2 [DarkGray]	1	4	cell part;cytoplasmic part;intracellular membrane-bounded organelle;intracellular organelle;intracellular part;membrane-bounded organelle;mitochondrion;organelle	13	13	13	42.3	42.3	42.3	37.548	0	67.338	2380400000	82	28.904	28.7887	28.8728	28.0634	28.4075	28.1993
+	3.30457	-2.23711	Q8VCA8	Q8VCA8	Secernin-2	Scrn2	Color2 [DarkGray]	1	4	extracellular membrane-bounded organelle;extracellular organelle;extracellular region part;extracellular vesicular exosome;membrane-bounded organelle;membrane-bounded vesicle;organelle;vesicle	5	5	5	19.8	19.8	19.8	46.6	0	11.214	92296000	5	22.3437	21.7813	22.0033	24.027	24.2943	24.5184
+	2.07514	0.707271	Q8VCF0	Q8VCF0	Mitochondrial antiviral-signaling protein	Mavs	Color2 [DarkGray]	1	4	cell part;cytoplasmic part;integral to membrane;intracellular membrane-bounded organelle;intracellular organelle;intracellular organelle part;intracellular part;intrinsic to membrane;membrane;membrane part;membrane-bounded organelle;microbody;microbody membrane;microbody part;mitochondrial membrane;mitochondrial outer membrane;mitochondrial part;mitochondrion;organelle;organelle membrane;organell…	6	6	6	24.5	24.5	24.5	53.398	0	48.282	509440000	27	26.5601	26.4995	26.9598	25.9296	26.0077	25.9602
+	1.66189	0.49295	Q8VCT3	Q8VCT3	Aminopeptidase B	Rnpep	Color2 [DarkGray]	1	4	cell part;extracellular membrane-bounded organelle;extracellular organelle;extracellular region;extracellular region part;extracellular space;extracellular vesicular exosome;membrane;membrane-bounded organelle;membrane-bounded vesicle;organelle;plasma membrane;vesicle	5	5	5	10.3	10.3	10.3	72.415	0	16.846	157330000	16	24.9454	24.9638	24.6769	24.1819	24.5143	24.4111
+	2.48564	4.50761	Q8VCT4;Q8VCC2;Q91WU0;Q64176	Q8VCT4	Carboxylesterase 1D	Ces1d	Color2 [DarkGray]	1	4	cell part;cytoplasmic part;cytosol;endoplasmic reticulum;endoplasmic reticulum lumen;endoplasmic reticulum part;extracellular region part;extracellular space;intracellular membrane-bounded organelle;intracellular organelle;intracellular organelle lumen;intracellular organelle part;intracellular part;lipid particle;membrane-bounded organelle;membrane-enclosed lumen;organelle;organelle lumen;organe…	16	13	13	33.5	28.1	28.1	61.787	0	52.404	880150000	38	28.753	27.1876	28.1471	23.2876	22.7017	24.5756
+	1.45115	0.527906	Q8VCW8	Q8VCW8	Acyl-CoA synthetase family member 2, mitochondrial	Acsf2	Color2 [DarkGray]	1	4	cell part;cytoplasmic part;intracellular membrane-bounded organelle;intracellular organelle;intracellular part;membrane-bounded organelle;mitochondrion;organelle	15	15	15	33.5	33.5	33.5	67.95	0	86.187	2078300000	72	28.4589	28.7001	28.6591	27.7762	28.2544	28.2037
+	2.59777	1.29404	Q8VD26	Q8VD26	Transmembrane protein 143	Tmem143	Color2 [DarkGray]	1	4	cell part;cytoplasmic part;integral to membrane;intracellular membrane-bounded organelle;intracellular organelle;intracellular part;intrinsic to membrane;membrane part;membrane-bounded organelle;mitochondrion;organelle	6	6	6	16.4	16.4	16.4	51.595	0	49.51	561250000	36	26.9636	27.0141	27.1244	25.3715	25.8795	25.9689
+	1.76858	0.491363	Q8VDC0	Q8VDC0	Probable leucine--tRNA ligase, mitochondrial	Lars2	Color2 [DarkGray]	1	4	cell part;cytoplasmic part;intracellular membrane-bounded organelle;intracellular organelle;intracellular organelle lumen;intracellular organelle part;intracellular part;membrane-bounded organelle;membrane-enclosed lumen;mitochondrial matrix;mitochondrial part;mitochondrion;organelle;organelle lumen;organelle part	8	8	8	8.9	8.9	8.9	101.48	0	14.548	233880000	17	25.5017	25.3541	25.5487	25.1687	24.7868	24.9749
+	2.34459	-0.573232	Q8VDD5	Q8VDD5	Myosin-9	Myh9	Color2 [DarkGray]	1	4	actin cytoskeleton;actin filament bundle;actomyosin;actomyosin contractile ring;adherens junction;anchoring junction;brush border;cell cortex;cell cortex part;cell division site part;cell junction;cell leading edge;cell part;cell projection;cell-cell adherens junction;cell-cell junction;cleavage furrow;contractile ring;cortical cytoskeleton;cytoplasm;cytoplasmic part;cytoskeletal part;cytoskeleto…	96	95	78	49.9	49.4	41.5	226.37	0	323.31	19523000000	547	31.156	31.2572	31.3073	31.7613	31.9871	31.6919
+	4.36269	-0.570162	Q8VDM4	Q8VDM4	26S proteasome non-ATPase regulatory subunit 2	Psmd2	Color2 [DarkGray]	1	4	cell part;extracellular membrane-bounded organelle;extracellular organelle;extracellular region part;extracellular vesicular exosome;intracellular part;macromolecular complex;membrane;membrane-bounded organelle;membrane-bounded vesicle;organelle;proteasome accessory complex;proteasome complex;proteasome regulatory particle;protein complex;vesicle	28	28	28	36.9	36.9	36.9	100.2	0	156.95	2456500000	119	28.2617	28.1912	28.2842	28.8034	28.8353	28.8089
+	4.01928	0.749715	Q8VDN2;Q64436	Q8VDN2	Sodium/potassium-transporting ATPase subunit alpha-1	Atp1a1	Color2 [DarkGray]	1	4	apical plasma membrane;basolateral plasma membrane;caveola;cell part;cytoplasmic membrane-bounded vesicle;cytoplasmic part;cytoplasmic vesicle;endoplasmic reticulum;endosome;extracellular membrane-bounded organelle;extracellular organelle;extracellular region part;extracellular space;extracellular vesicular exosome;Golgi apparatus;integral to membrane;intracellular membrane-bounded organelle;intr…	44	44	29	47.1	47.1	30	112.98	0	323.31	23875000000	443	32.1248	32.2417	32.2745	31.4733	31.4831	31.4355
+	2.29974	0.788714	Q8VDQ1	Q8VDQ1	Prostaglandin reductase 2	Ptgr2	Color2 [DarkGray]	1	4	cell part;cytoplasmic part;cytosol;extracellular membrane-bounded organelle;extracellular organelle;extracellular region part;extracellular vesicular exosome;intracellular membrane-bounded organelle;intracellular organelle;intracellular part;membrane-bounded organelle;membrane-bounded vesicle;mitochondrion;organelle;vesicle	9	9	9	38.5	38.5	38.5	38.015	0	49.106	995720000	30	27.5556	27.5377	27.8191	27.0623	26.7167	26.7672
+	1.31957	-0.82608	Q8VDW0	Q8VDW0	ATP-dependent RNA helicase DDX39A	Ddx39a	Color2 [DarkGray]	1	4	cell part;cytoplasm;intracellular membrane-bounded organelle;intracellular non-membrane-bounded organelle;intracellular organelle;intracellular organelle part;intracellular part;macromolecular complex;membrane;membrane-bounded organelle;non-membrane-bounded organelle;nuclear part;nucleolus;nucleus;organelle;organelle part;ribonucleoprotein complex;spliceosomal complex	9	2	2	27.9	6.6	6.6	49.067	0	4.5998	73806000	6	23.1473	23.1284	22.9295	23.3341	24.2623	24.0869
+	2.0543	0.420084	Q8VE22	Q8VE22	28S ribosomal protein S23, mitochondrial	Mrps23	Color2 [DarkGray]	1	4	cell part;cytoplasmic part;cytoskeleton;intermediate filament cytoskeleton;intracellular membrane-bounded organelle;intracellular non-membrane-bounded organelle;intracellular organelle;intracellular organelle part;intracellular part;macromolecular complex;membrane;membrane-bounded organelle;mitochondrial part;mitochondrial small ribosomal subunit;mitochondrion;non-membrane-bounded organelle;nucle…	7	7	7	42.4	42.4	42.4	20.348	0	28.287	383230000	26	26.0858	26.23	26.2071	25.6157	25.7701	25.8768
+	1.63556	-1.17905	Q8VE47	Q8VE47	Ubiquitin-like modifier-activating enzyme 5	Uba5	Color2 [DarkGray]	1	4	cell part;cytoplasm;cytoplasmic part;cytosol;intracellular membrane-bounded organelle;intracellular organelle;intracellular part;membrane-bounded organelle;nucleus;organelle	3	3	3	12.2	12.2	12.2	44.789	0	4.7023	62532000	4	23.3738	22.326	22.4622	23.9069	23.9199	23.8724
+	2.09207	-1.27005	Q8VEE1	Q8VEE1	LIM and cysteine-rich domains protein 1	Lmcd1	Color2 [DarkGray]	1	4	cell part;cytoplasm;extracellular matrix;extracellular region part;extracellular space;intracellular membrane-bounded organelle;intracellular organelle;intracellular part;membrane-bounded organelle;nucleus;organelle	12	12	12	39.7	39.7	39.7	40.996	0	59.112	620320000	28	25.8778	25.7455	25.5806	26.5206	27.3122	27.1813
+	3.05787	-0.800812	Q8VHX6	Q8VHX6	Filamin-C	Flnc	Color2 [DarkGray]	1	4	actin cytoskeleton;adherens junction;anchoring junction;cell junction;cell part;cell-substrate adherens junction;cell-substrate junction;contractile fiber part;cytoplasm;cytoplasmic part;cytoskeleton;focal adhesion;intracellular non-membrane-bounded organelle;intracellular organelle;intracellular part;membrane;non-membrane-bounded organelle;organelle;organelle part;plasma membrane;sarcolemma;sarc…	115	115	103	55	55	50.7	291.12	0	323.31	28501000000	739	31.4975	31.7082	31.6752	32.3626	32.5508	32.37
+	1.54516	-2.18207	Q8VI75	Q8VI75	Importin-4	Ipo4	Color2 [DarkGray]	1	4	cell part;chromatin;chromosomal part;cytoplasm;intracellular organelle part;intracellular part;macromolecular complex;membrane;nuclear chromatin;nuclear chromosome part;nuclear part;organelle part;protein complex	6	6	6	6.3	6.3	6.3	119.27	0	10.367	101080000	10	23.3422	22.7968	21.2078	24.4131	24.8143	24.6655
+	1.83885	0.891365	Q91V16	Q91V16	LYR motif-containing protein 5	Lyrm5	Color2 [DarkGray]	1	4	cell part;cytoplasmic part;intracellular membrane-bounded organelle;intracellular organelle;intracellular part;membrane-bounded organelle;mitochondrion;organelle	2	2	2	18.6	18.6	18.6	10.391	0	8.8393	143990000	11	24.855	24.8157	25.372	23.9683	24.0407	24.3596
+	3.43501	0.882601	Q91V64	Q91V64	Isochorismatase domain-containing protein 1	Isoc1	Color2 [DarkGray]	1	4	cell part;cytoplasmic part;extracellular membrane-bounded organelle;extracellular organelle;extracellular region part;extracellular vesicular exosome;intracellular membrane-bounded organelle;intracellular organelle;intracellular part;membrane-bounded organelle;membrane-bounded vesicle;microbody;organelle;peroxisome;vesicle	6	6	6	26.9	26.9	26.9	32.032	0	21.853	579640000	24	26.9577	26.9931	26.8563	26.0316	26.1795	25.9482
+	0.808588	2.40808	Q91V92	Q91V92	ATP-citrate synthase	Acly	Color2 [DarkGray]	1	4	cell part;cytoplasm;cytoplasmic part;extracellular membrane-bounded organelle;extracellular organelle;extracellular region part;extracellular vesicular exosome;intracellular;intracellular membrane-bounded organelle;intracellular organelle;intracellular organelle part;intracellular part;membrane;membrane-bounded organelle;membrane-bounded vesicle;mitochondrion;nuclear part;nucleoplasm;organelle;or…	30	30	30	40	40	40	119.73	0	186.21	1662900000	68	29.9881	26.2624	28.198	24.0213	26.5487	26.6543
+	2.0194	0.44847	Q91VD9	Q91VD9	NADH-ubiquinone oxidoreductase 75 kDa subunit, mitochondrial	Ndufs1	Color2 [DarkGray]	1	4	cell part;cytoplasmic part;intracellular membrane-bounded organelle;intracellular organelle;intracellular organelle part;intracellular part;macromolecular complex;membrane part;membrane-bounded organelle;membrane-enclosed lumen;mitochondrial intermembrane space;mitochondrial membrane part;mitochondrial part;mitochondrial respiratory chain complex I;mitochondrion;myelin sheath;NADH dehydrogenase c…	47	47	47	78.5	78.5	78.5	79.776	0	323.31	71318000000	667	33.5629	33.665	33.6861	33.1059	33.0966	33.3661
+	2.34307	0.946156	Q91VM9	Q91VM9	Inorganic pyrophosphatase 2, mitochondrial	Ppa2	Color2 [DarkGray]	1	4	cell part;cytoplasmic part;extracellular membrane-bounded organelle;extracellular organelle;extracellular region part;extracellular vesicular exosome;intracellular membrane-bounded organelle;intracellular organelle;intracellular part;membrane-bounded organelle;membrane-bounded vesicle;mitochondrion;organelle;vesicle	18	18	18	69.7	69.7	69.7	38.114	0	142.09	2667000000	103	28.9465	29.1923	29.337	27.9766	28.3067	28.3541
+	1.78222	0.541531	Q91VT4	Q91VT4	Carbonyl reductase family member 4	Cbr4	Color2 [DarkGray]	1	4	cell part;cytoplasmic part;intracellular membrane-bounded organelle;intracellular organelle;intracellular organelle lumen;intracellular organelle part;intracellular part;membrane-bounded organelle;membrane-enclosed lumen;mitochondrial matrix;mitochondrial part;mitochondrion;organelle;organelle lumen;organelle part	10	10	10	50.8	50.8	50.8	25.414	0	53.245	1574000000	55	27.985	28.3617	28.31	27.5461	27.7092	27.7768
+	2.37021	-0.994301	Q91W50	Q91W50	Cold shock domain-containing protein E1	Csde1	Color2 [DarkGray]	1	4	cell part;CRD-mediated mRNA stability complex;cytoplasm;cytoplasmic part;Golgi apparatus;intracellular membrane-bounded organelle;intracellular organelle;intracellular organelle part;intracellular part;macromolecular complex;membrane;membrane-bounded organelle;mitochondrial inner membrane;mitochondrial membrane;mitochondrial part;organelle;organelle inner membrane;organelle membrane;organelle par…	6	6	6	9.3	9.3	9.3	88.79	0	26.478	152560000	16	24.085	23.9521	23.7994	25.0476	25.1258	24.646
+	1.57055	-0.855646	Q91W90	Q91W90	Thioredoxin domain-containing protein 5	Txndc5	Color2 [DarkGray]	1	4	cell part;cytoplasmic part;endoplasmic reticulum lumen;endoplasmic reticulum part;extracellular membrane-bounded organelle;extracellular organelle;extracellular region part;extracellular vesicular exosome;intracellular organelle lumen;intracellular organelle part;intracellular part;membrane-bounded organelle;membrane-bounded vesicle;membrane-enclosed lumen;organelle;organelle lumen;organelle part…	8	8	8	28.1	28.1	28.1	46.415	0	40.99	471690000	18	25.6424	25.5408	25.7424	26.0158	26.6746	26.8021
+	2.68727	0.686899	Q91WD5	Q91WD5	NADH dehydrogenase [ubiquinone] iron-sulfur protein 2, mitochondrial	Ndufs2	Color2 [DarkGray]	1	4	cell part;cytoplasmic part;intracellular membrane-bounded organelle;intracellular organelle;intracellular organelle part;intracellular part;macromolecular complex;membrane part;membrane-bounded organelle;mitochondrial membrane part;mitochondrial part;mitochondrial respiratory chain complex I;mitochondrion;NADH dehydrogenase complex;nuclear part;nucleoplasm;organelle;organelle part;protein complex…	27	27	27	68.5	68.5	68.5	52.625	0	323.31	27446000000	596	32.3239	32.3871	32.4026	31.5848	31.5972	31.871
+	1.94863	0.691535	Q91WK1	Q91WK1	SPRY domain-containing protein 4	Spryd4	Color2 [DarkGray]	1	4	cell part;cytoplasmic part;intracellular membrane-bounded organelle;intracellular organelle;intracellular part;membrane-bounded organelle;mitochondrion;nucleus;organelle	8	8	8	46.9	46.9	46.9	23.275	0	32.584	659510000	37	27.0713	27.0207	27.0236	26.6542	26.1632	26.2236
+	3.00842	-0.912215	Q91WK2	Q91WK2	Eukaryotic translation initiation factor 3 subunit H	Eif3h	Color2 [DarkGray]	1	4	cell part;cytoplasmic part;eukaryotic 43S preinitiation complex;eukaryotic 48S preinitiation complex;eukaryotic translation initiation factor 3 complex;eukaryotic translation initiation factor 3 complex, eIF3m;extracellular membrane-bounded organelle;extracellular organelle;extracellular region part;extracellular vesicular exosome;intracellular part;macromolecular complex;membrane;membrane-bounde…	9	9	9	31.5	31.5	31.5	39.832	0	34.049	456270000	26	25.4631	25.5052	25.7338	26.4175	26.6067	26.4146
+	1.46706	0.758019	Q91WK5	Q91WK5	Glycine cleavage system H protein, mitochondrial	Gcsh	Color2 [DarkGray]	1	4	cell part;cytoplasmic part;glycine cleavage complex;intracellular membrane-bounded organelle;intracellular organelle;intracellular part;macromolecular complex;membrane-bounded organelle;mitochondrion;organelle;protein complex	2	2	2	17.6	17.6	17.6	18.637	0	23.02	246990000	12	25.4504	25.6793	25.7494	24.4246	25.0729	25.1075
+	0.989255	1.4194	Q91XE4	Q91XE4	N-acyl-aromatic-L-amino acid amidohydrolase (carboxylate-forming)	Acy3	Color2 [DarkGray]	1	4	apical plasma membrane;cell part;cytoplasm;extracellular membrane-bounded organelle;extracellular organelle;extracellular region part;extracellular vesicular exosome;intracellular part;membrane;membrane part;membrane-bounded organelle;membrane-bounded vesicle;organelle;plasma membrane part;vesicle	6	6	6	27	27	27	35.286	0	7.4273	120120000	9	24.718	24.3743	25.2873	22.1499	24.133	23.8386
+	0.882817	1.74826	Q91XL9	Q91XL9	Oxysterol-binding protein-related protein 1	Osbpl1a	Color2 [DarkGray]	1	4	cell part;cytoplasm;cytoplasmic part;endosome;extracellular membrane-bounded organelle;extracellular organelle;extracellular region part;extracellular vesicular exosome;intracellular membrane-bounded organelle;intracellular organelle;intracellular organelle part;intracellular part;late endosome;membrane-bounded organelle;membrane-bounded vesicle;nuclear part;nucleoplasm;nucleus;organelle;organell…	2	2	2	1.8	1.8	1.8	107.79	0.0046612	1.9263	435950000	7	25.2532	25.2117	24.9902	22.6478	22.3305	25.2321
+	1.27994	-0.647043	Q91YE8	Q91YE8	Synaptopodin-2	Synpo2	Color2 [DarkGray]	1	4	actin cytoskeleton;adherens junction;anchoring junction;cell junction;cell part;cell-substrate adherens junction;cell-substrate junction;contractile fiber part;cytoplasmic part;cytoskeleton;focal adhesion;intracellular membrane-bounded organelle;intracellular non-membrane-bounded organelle;intracellular organelle;intracellular part;membrane-bounded organelle;non-membrane-bounded organelle;nucleus…	14	14	14	19.4	19.4	19.4	116.53	0	74.857	957910000	71	26.4758	26.8724	27.1914	27.5626	27.6503	27.2679
+	1.88399	-0.573054	Q91YN9	Q91YN9	BAG family molecular chaperone regulator 2	Bag2	Color2 [DarkGray]	1	4		2	2	2	12.9	12.9	12.9	23.473	0	12.483	190200000	9	24.4953	24.3916	24.8288	25.1928	25.1007	25.1413
+	1.70764	0.511971	Q91YT0	Q91YT0	NADH dehydrogenase [ubiquinone] flavoprotein 1, mitochondrial	Ndufv1	Color2 [DarkGray]	1	4	cell part;cytoplasmic part;intracellular membrane-bounded organelle;intracellular organelle;intracellular organelle part;intracellular part;macromolecular complex;membrane;membrane part;membrane-bounded organelle;mitochondrial inner membrane;mitochondrial membrane;mitochondrial membrane part;mitochondrial part;mitochondrial respiratory chain complex I;mitochondrion;NADH dehydrogenase complex;orga…	28	28	28	73.7	73.7	73.7	50.834	0	323.31	42516000000	441	32.864	32.9631	32.9667	32.3909	32.2069	32.66
+	1.62716	2.47712	Q91YY4	Q91YY4	ATP synthase mitochondrial F1 complex assembly factor 2	Atpaf2	Color2 [DarkGray]	1	4	cell part;cytoplasmic part;intracellular membrane-bounded organelle;intracellular organelle;intracellular organelle part;intracellular part;membrane-bounded organelle;mitochondrion;nuclear body;nuclear part;nuclear speck;nucleoplasm part;organelle;organelle part	5	5	5	26.6	26.6	26.6	33.289	0	12.513	248450000	12	26.111	25.8751	26.2732	22.5211	23.4292	24.8777
+	3.01899	-5.49495	Q91Z83	Q91Z83	Myosin-7	Myh7	Color2 [DarkGray]	1	4	actin filament bundle;actomyosin;adherens junction;anchoring junction;cell junction;cell part;cell-substrate adherens junction;cell-substrate junction;contractile fiber;contractile fiber part;cytoplasm;cytoplasmic part;cytoskeletal part;focal adhesion;intracellular non-membrane-bounded organelle;intracellular organelle;intracellular organelle part;intracellular part;macromolecular complex;myofibr…	191	54	48	69.1	27.1	25.7	222.88	0	323.31	47770000000	377	27.628	28.0913	27.9886	34.5416	33.2173	32.4338
+	2.30027	0.583581	Q91ZA3	Q91ZA3	Propionyl-CoA carboxylase alpha chain, mitochondrial	Pcca	Color2 [DarkGray]	1	4	cell part;cytoplasmic part;intracellular membrane-bounded organelle;intracellular organelle;intracellular organelle lumen;intracellular organelle part;intracellular part;membrane-bounded organelle;membrane-enclosed lumen;mitochondrial matrix;mitochondrial part;mitochondrion;organelle;organelle lumen;organelle part	26	26	26	41.3	41.3	41.3	79.921	0	102.86	2425000000	149	28.9287	28.7381	28.9463	28.1514	28.2819	28.4291
+	1.98705	0.715667	Q91ZE0	Q91ZE0	Trimethyllysine dioxygenase, mitochondrial	Tmlhe	Color2 [DarkGray]	1	4	cell part;cytoplasmic part;intracellular membrane-bounded organelle;intracellular organelle;intracellular organelle lumen;intracellular organelle part;intracellular part;membrane-bounded organelle;membrane-enclosed lumen;mitochondrial matrix;mitochondrial part;mitochondrion;organelle;organelle lumen;organelle part	6	6	6	14.7	14.7	14.7	49.609	0	10.241	230410000	22	25.6604	25.4642	25.4491	24.6889	24.6475	25.0904
+	2.37126	-0.535715	Q91ZU6	Q91ZU6	Dystonin	Dst	Color2 [DarkGray]	1	4	actin cytoskeleton;actin filament bundle;actomyosin;adherens junction;anchoring junction;axon;cell cortex;cell junction;cell part;cell projection;cell-cell contact zone;cell-cell junction;cell-substrate adherens junction;cell-substrate junction;contractile fiber part;cytoplasm;cytoplasmic membrane-bounded vesicle;cytoplasmic part;cytoplasmic vesicle;cytoskeletal part;cytoskeleton;endoplasmic reti…	12	11	11	2	1.8	1.8	834.21	0	20.909	189590000	23	24.6772	24.535	24.6423	25.0631	25.0832	25.3153
+	2.00408	-1.51873	Q91ZX7	Q91ZX7	Prolow-density lipoprotein receptor-related protein 1;Low-density lipoprotein receptor-related protein 1 85 kDa subunit;Low-density lipoprotein receptor-related protein 1 515 kDa subunit;Low-density lipoprotein receptor-related protein 1 intracellular domain	Lrp1	Color2 [DarkGray]	1	4	adherens junction;anchoring junction;cell body;cell junction;cell part;cell projection;cell-substrate adherens junction;cell-substrate junction;clathrin-coated vesicle;coated pit;coated vesicle;cytoplasm;cytoplasmic membrane-bounded vesicle;cytoplasmic part;cytoplasmic vesicle;dendrite;endosome;focal adhesion;integral to membrane;integral to plasma membrane;intracellular membrane-bounded organell…	23	23	23	6	6	6	504.74	0	41.082	417100000	35	25.2537	24.7258	24.8871	26.1336	27.0501	26.239
+	2.04805	0.443914	Q921G7	Q921G7	Electron transfer flavoprotein-ubiquinone oxidoreductase, mitochondrial	Etfdh	Color2 [DarkGray]	1	4	cell part;cytoplasmic part;electron transfer flavoprotein complex;integral to membrane;integral to mitochondrial inner membrane;integral to mitochondrial membrane;integral to organelle membrane;intracellular membrane-bounded organelle;intracellular organelle;intracellular organelle part;intracellular part;intrinsic to membrane;intrinsic to mitochondrial inner membrane;intrinsic to organelle membr…	29	29	29	61.7	61.7	61.7	68.09	0	323.31	35020000000	360	32.4993	32.6209	32.7796	32.1521	32.1347	32.2813
+	1.11613	1.27353	Q921H9	Q921H9	Cytochrome c oxidase assembly factor 7	Coa7	Color2 [DarkGray]	1	4	cell part;cytoplasmic part;intracellular organelle part;intracellular part;membrane-enclosed lumen;mitochondrial intermembrane space;mitochondrial part;organelle envelope lumen;organelle part	5	5	5	35.1	35.1	35.1	25.617	0	14.384	165410000	17	25.3941	25.0917	25.2048	24.5897	22.9054	24.3748
+	2.17832	2.07266	Q921U8	Q921U8	Smoothelin	Smtn	Color2 [DarkGray]	1	4	actin cytoskeleton;cell part;cytoplasm;cytoskeleton;intracellular non-membrane-bounded organelle;intracellular organelle;intracellular organelle part;intracellular part;non-membrane-bounded organelle;nuclear part;nucleoplasm;organelle;organelle part	3	3	3	5.4	5.4	5.4	100.29	0	83.846	119590000	7	24.9361	25.1248	25.4492	22.4024	23.2173	23.6724
+	3.43088	1.16942	Q922B1	Q922B1	O-acetyl-ADP-ribose deacetylase MACROD1	Macrod1	Color2 [DarkGray]	1	4	cell part;cytoplasmic part;intracellular membrane-bounded organelle;intracellular organelle;intracellular part;membrane-bounded organelle;mitochondrion;nucleus;organelle	11	11	11	37.8	37.8	37.8	35.294	0	129.53	3597400000	73	29.6584	29.6661	29.6846	28.33	28.6912	28.4797
+	1.06343	-0.843713	Q922F4	Q922F4	Tubulin beta-6 chain	Tubb6	Color2 [DarkGray]	1	4	cell part;cytoplasm;cytoskeletal part;extracellular membrane-bounded organelle;extracellular organelle;extracellular region part;extracellular vesicular exosome;intracellular membrane-bounded organelle;intracellular organelle;intracellular organelle part;intracellular part;macromolecular complex;membrane-bounded organelle;membrane-bounded vesicle;microtubule;nucleus;organelle;organelle part;prote…	19	7	5	53.2	22.6	17.4	50.09	0	35.247	2543400000	26	27.4856	28.5585	28.1653	29.0596	29.1667	28.5142
+	2.38511	-1.00613	Q922Q8	Q922Q8	Leucine-rich repeat-containing protein 59	Lrrc59	Color2 [DarkGray]	1	4	cell part;cytoplasmic part;endoplasmic reticulum;endoplasmic reticulum membrane;endoplasmic reticulum part;envelope;integral to membrane;intracellular membrane-bounded organelle;intracellular non-membrane-bounded organelle;intracellular organelle;intracellular organelle part;intracellular part;intrinsic to membrane;membrane;membrane part;membrane-bounded organelle;mitochondrial nucleoid;mitochond…	8	8	8	39.7	39.7	39.7	34.877	0	40.524	653740000	23	26.0755	25.908	26.0847	26.715	27.2438	27.1278
+	1.62452	0.580042	Q924D0	Q924D0	Reticulon-4-interacting protein 1, mitochondrial	Rtn4ip1	Color2 [DarkGray]	1	4	cell part;cytoplasmic part;intracellular membrane-bounded organelle;intracellular organelle;intracellular part;membrane-bounded organelle;mitochondrion;organelle	12	12	12	42.4	42.4	42.4	43.371	0	80.813	1313100000	60	27.7933	28.0475	28.0553	27.2343	27.2592	27.6624
+	3.73907	0.76161	Q924M7	Q924M7	Mannose-6-phosphate isomerase	Mpi	Color2 [DarkGray]	1	4	cell part;cytoplasm;extracellular membrane-bounded organelle;extracellular organelle;extracellular region part;extracellular vesicular exosome;intracellular part;membrane-bounded organelle;membrane-bounded vesicle;organelle;vesicle	15	15	15	56.3	56.3	56.3	46.575	0	126.52	2935400000	101	29.18	29.2373	29.2263	28.3999	28.5615	28.3973
+	3.35713	0.796399	Q924X2	Q924X2	Carnitine O-palmitoyltransferase 1, muscle isoform	Cpt1b	Color2 [DarkGray]	1	4	cell part;cytoplasmic part;integral to membrane;intracellular membrane-bounded organelle;intracellular organelle;intracellular organelle part;intracellular part;intrinsic to membrane;membrane;membrane part;membrane-bounded organelle;mitochondrial membrane;mitochondrial outer membrane;mitochondrial part;mitochondrion;organelle;organelle membrane;organelle outer membrane;organelle part;outer membra…	33	33	31	50.8	50.8	48.1	88.216	0	323.31	27582000000	457	32.4139	32.4652	32.4684	31.6814	31.5152	31.7618
+	2.6201	0.608927	Q99J39	Q99J39	Malonyl-CoA decarboxylase, mitochondrial	Mlycd	Color2 [DarkGray]	1	4	cell part;cytoplasm;cytoplasmic part;cytosol;intracellular membrane-bounded organelle;intracellular organelle;intracellular organelle lumen;intracellular organelle part;intracellular part;membrane-bounded organelle;membrane-enclosed lumen;microbody;microbody lumen;microbody part;mitochondrial matrix;mitochondrial part;mitochondrion;organelle;organelle lumen;organelle part;peroxisomal matrix;perox…	14	14	14	41.3	41.3	41.3	54.735	0	117.79	1179000000	66	27.7146	27.9713	27.8332	27.1323	27.273	27.2869
+	2.88697	0.861437	Q99J99	Q99J99	3-mercaptopyruvate sulfurtransferase	Mpst	Color2 [DarkGray]	1	4	cell junction;cell part;cell projection;cytoplasm;cytoplasmic part;extracellular membrane-bounded organelle;extracellular organelle;extracellular region part;extracellular vesicular exosome;intracellular membrane-bounded organelle;intracellular organelle;intracellular organelle part;intracellular part;membrane;membrane-bounded organelle;membrane-bounded vesicle;mitochondrial inner membrane;mitoch…	5	5	5	23.2	23.2	23.2	33.023	0	11.415	425210000	26	26.3524	26.5261	26.6163	25.4924	25.7371	25.681
+	1.47796	-0.748442	Q99JI4	Q99JI4	26S proteasome non-ATPase regulatory subunit 6	Psmd6	Color2 [DarkGray]	1	4	cell part;extracellular membrane-bounded organelle;extracellular organelle;extracellular region part;extracellular vesicular exosome;intracellular part;macromolecular complex;membrane-bounded organelle;membrane-bounded vesicle;organelle;proteasome accessory complex;proteasome complex;proteasome regulatory particle;protein complex;vesicle	17	17	17	44.2	44.2	44.2	45.536	0	54.14	1285700000	46	27.2553	26.8159	27.4975	27.9489	28.1467	27.7184
+	1.74773	-1.2521	Q99JR5	Q99JR5	Tubulointerstitial nephritis antigen-like	Tinagl1	Color2 [DarkGray]	1	4	cell part;cytoplasm;extracellular matrix;extracellular membrane-bounded organelle;extracellular organelle;extracellular region part;extracellular space;extracellular vesicular exosome;intracellular part;membrane-bounded organelle;membrane-bounded vesicle;organelle;vesicle	8	8	8	27.9	27.9	27.9	52.664	0	21.66	384200000	15	25.1346	24.6135	25.3439	26.724	25.9032	26.221
+	1.41449	1.95567	Q99JR6	Q99JR6	Nicotinamide/nicotinic acid mononucleotide adenylyltransferase 3	Nmnat3	Color2 [DarkGray]	1	4	cell part;cytoplasmic part;intracellular membrane-bounded organelle;intracellular organelle;intracellular part;membrane-bounded organelle;mitochondrion;organelle	7	7	7	34.3	34.3	34.3	27.702	0	19.335	193320000	10	25.2597	25.4285	25.8196	22.8142	24.7843	23.0423
+	2.2863	-2.4459	Q99JX3	Q99JX3	Golgi reassembly-stacking protein 2	Gorasp2	Color2 [DarkGray]	1	4	cell part;cytoplasmic part;Golgi apparatus;Golgi apparatus part;Golgi membrane;intracellular membrane-bounded organelle;intracellular organelle;intracellular organelle part;intracellular part;membrane;membrane-bounded organelle;organelle;organelle membrane;organelle part	3	3	3	10.9	10.9	10.9	47.038	0	11.985	157810000	7	22.0789	23.6053	22.8089	25.3036	25.28	25.2472
+	2.81067	0.614432	Q99JY0	Q99JY0	Trifunctional enzyme subunit beta, mitochondrial;3-ketoacyl-CoA thiolase	Hadhb	Color2 [DarkGray]	1	4	cell part;cytoplasmic part;endoplasmic reticulum;extracellular membrane-bounded organelle;extracellular organelle;extracellular region part;extracellular vesicular exosome;fatty acid beta-oxidation multienzyme complex;intracellular membrane-bounded organelle;intracellular non-membrane-bounded organelle;intracellular organelle;intracellular organelle part;intracellular part;macromolecular complex;…	32	32	32	69.1	69.1	69.1	51.386	0	323.31	121350000000	758	34.4166	34.4509	34.4583	33.8077	33.7017	33.9731
+	3.89653	-1.23549	Q99K41	Q99K41	EMILIN-1	Emilin1	Color2 [DarkGray]	1	4	collagen;extracellular matrix;extracellular matrix part;extracellular membrane-bounded organelle;extracellular organelle;extracellular region;extracellular region part;extracellular vesicular exosome;membrane-bounded organelle;membrane-bounded vesicle;organelle;proteinaceous extracellular matrix;vesicle	18	18	18	24.6	24.6	24.6	107.58	0	83.98	696670000	51	25.9142	25.9113	25.9951	27.247	27.2637	27.0163
+	3.00371	-0.797083	Q99KF1	Q99KF1	Transmembrane emp24 domain-containing protein 9	Tmed9	Color2 [DarkGray]	1	4	cell part;cytoplasmic part;endoplasmic reticulum;endoplasmic reticulum membrane;endoplasmic reticulum part;endoplasmic reticulum-Golgi intermediate compartment;endoplasmic reticulum-Golgi intermediate compartment membrane;extracellular membrane-bounded organelle;extracellular organelle;extracellular region part;extracellular vesicular exosome;Golgi apparatus;Golgi apparatus part;Golgi membrane;in…	4	4	4	14	14	14	27.127	0	10.311	283350000	16	24.8385	25.0507	25.0659	25.7967	25.8712	25.6785
+	1.03794	-0.968457	Q99KN9	Q99KN9	Clathrin interactor 1	Clint1	Color2 [DarkGray]	1	4	cell part;clathrin-coated vesicle;coated vesicle;cytoplasmic membrane-bounded vesicle;cytoplasmic part;cytoplasmic vesicle;Golgi apparatus;intracellular membrane-bounded organelle;intracellular organelle;intracellular organelle part;intracellular part;membrane;membrane-bounded organelle;membrane-bounded vesicle;nuclear part;nucleoplasm;organelle;organelle part;perinuclear region of cytoplasm;vesi…	2	2	2	3.5	3.5	3.5	68.512	0	4.2964	74462000	5	23.8233	22.5719	22.4812	23.797	23.9632	24.0215
+	2.33121	2.04383	Q99KQ4	Q99KQ4	Nicotinamide phosphoribosyltransferase	Nampt	Color2 [DarkGray]	1	4	cell part;cytoplasm;cytoplasmic part;cytosol;extracellular membrane-bounded organelle;extracellular organelle;extracellular region part;extracellular space;extracellular vesicular exosome;intracellular membrane-bounded organelle;intracellular organelle;intracellular part;membrane-bounded organelle;membrane-bounded vesicle;nucleus;organelle;vesicle	15	15	15	39.5	39.5	39.5	55.446	0	128.12	1102800000	48	28.1252	28.1073	28.3275	26.1092	25.5522	26.7672
+	3.88438	0.671734	Q99KR7;Q9QZH3	Q99KR7	Peptidyl-prolyl cis-trans isomerase F, mitochondrial	Ppif	Color2 [DarkGray]	1	4	catalytic step 2 spliceosome;cell part;cytoplasmic part;intracellular membrane-bounded organelle;intracellular organelle;intracellular organelle lumen;intracellular organelle part;intracellular part;macromolecular complex;membrane;membrane part;membrane-bounded organelle;membrane-enclosed lumen;mitochondrial inner membrane;mitochondrial matrix;mitochondrial membrane;mitochondrial part;mitochondri…	7	7	7	51.5	51.5	51.5	21.737	0	109.17	3324200000	54	29.3808	29.3806	29.2519	28.6748	28.6329	28.6905
+	3.07198	0.953055	Q99L13	Q99L13	3-hydroxyisobutyrate dehydrogenase, mitochondrial	Hibadh	Color2 [DarkGray]	1	4	cell part;cytoplasmic part;intracellular membrane-bounded organelle;intracellular organelle;intracellular part;membrane-bounded organelle;mitochondrion;organelle	13	13	13	50.4	50.4	50.4	35.44	0	274.71	3847500000	140	29.7845	29.4959	29.6724	28.57	28.7447	28.7788
+	2.94477	0.738681	Q99L43	Q99L43	Phosphatidate cytidylyltransferase 2	Cds2	Color2 [DarkGray]	1	4	cell part;cytoplasmic part;endoplasmic reticulum;endoplasmic reticulum membrane;endoplasmic reticulum part;integral to membrane;intracellular membrane-bounded organelle;intracellular organelle;intracellular organelle part;intracellular part;intrinsic to membrane;membrane;membrane part;membrane-bounded organelle;mitochondrial inner membrane;mitochondrial membrane;mitochondrial part;organelle;organ…	4	4	4	12.2	12.2	12.2	51.313	0	13.945	158980000	21	24.9166	25.0491	24.9921	24.1163	24.3922	24.2334
+	2.46355	-0.581584	Q99L45	Q99L45	Eukaryotic translation initiation factor 2 subunit 2	Eif2s2	Color2 [DarkGray]	1	4	cell part;cytoplasm;intracellular part	13	13	13	36	36	36	38.092	0	98.822	773640000	35	26.6252	26.4692	26.5327	27.0019	27.2801	27.0898
+	2.0456	-0.531272	Q99L88	Q99L88	Beta-1-syntrophin	Sntb1	Color2 [DarkGray]	1	4	adherens junction;anchoring junction;cell junction;cell part;cell-substrate adherens junction;cell-substrate junction;cytoplasm;cytoskeleton;focal adhesion;intracellular non-membrane-bounded organelle;intracellular organelle;intracellular part;macromolecular complex;membrane;non-membrane-bounded organelle;organelle;plasma membrane;protein complex;sarcolemma;synapse	14	14	13	30	30	28.7	58.081	0	42.108	538790000	43	26.0366	25.9255	26.1737	26.7171	26.5918	26.4207
+	2.07642	0.78545	Q99LB2	Q99LB2	Dehydrogenase/reductase SDR family member 4	Dhrs4	Color2 [DarkGray]	1	4	cell part;cytoplasmic part;extracellular membrane-bounded organelle;extracellular organelle;extracellular region part;extracellular vesicular exosome;intracellular membrane-bounded organelle;intracellular organelle;intracellular organelle part;intracellular part;membrane;membrane-bounded organelle;membrane-bounded vesicle;microbody;microbody membrane;microbody part;mitochondrion;nuclear membrane;…	8	8	8	29.4	29.4	29.4	29.884	0	73.477	2107000000	66	28.6718	28.7936	28.6597	27.6587	27.9098	28.2003
+	3.17212	0.979158	Q99LC5	Q99LC5	Electron transfer flavoprotein subunit alpha, mitochondrial	Etfa	Color2 [DarkGray]	1	4	cell part;cytoplasmic part;electron transfer flavoprotein complex;extracellular membrane-bounded organelle;extracellular organelle;extracellular region part;extracellular vesicular exosome;intracellular membrane-bounded organelle;intracellular organelle;intracellular organelle part;intracellular part;macromolecular complex;membrane-bounded organelle;membrane-bounded vesicle;mitochondrial electron…	19	19	19	72.4	72.4	72.4	35.009	0	323.31	74598000000	295	33.9884	33.8417	34.0444	32.8294	33.1156	32.9919
+	1.92027	-0.568088	Q99LD4	Q99LD4	COP9 signalosome complex subunit 1	Gps1	Color2 [DarkGray]	1	4	cell part;cytoplasm;intracellular membrane-bounded organelle;intracellular organelle;intracellular organelle part;intracellular part;macromolecular complex;membrane-bounded organelle;nuclear part;nucleus;organelle;organelle part;protein complex;signalosome	7	7	7	13.6	13.6	13.6	53.442	0	13.347	334620000	19	25.4807	25.0989	25.4876	25.883	25.9528	25.9357
+	1.45755	-0.708963	Q99LJ6	Q99LJ6	Glutathione peroxidase 7	Gpx7	Color2 [DarkGray]	1	4	cell part;cytoplasmic part;endoplasmic reticulum;extracellular region;intracellular membrane-bounded organelle;intracellular organelle;intracellular part;membrane-bounded organelle;organelle	4	4	4	34.4	34.4	34.4	21.061	0	13.923	162020000	16	24.2723	24.0339	24.3235	24.5593	25.278	24.9193
+	1.0946	1.89363	Q99M01	Q99M01	Phenylalanine--tRNA ligase, mitochondrial	Fars2	Color2 [DarkGray]	1	4	cell part;cytoplasmic part;intracellular membrane-bounded organelle;intracellular organelle;intracellular organelle lumen;intracellular organelle part;intracellular part;membrane-bounded organelle;membrane-enclosed lumen;mitochondrial matrix;mitochondrial part;mitochondrion;organelle;organelle lumen;organelle part	5	5	5	12	12	12	52.336	0	6.8906	116980000	5	24.894	24.7056	25.2278	21.7793	22.8433	24.524
+	2.8925	0.700395	Q99M87	Q99M87	DnaJ homolog subfamily A member 3, mitochondrial	Dnaja3	Color2 [DarkGray]	1	4	actin filament;cell junction;cell part;cytoplasm;cytoplasmic part;cytoskeletal part;cytosol;cytosolic part;extrinsic to membrane;extrinsic to plasma membrane;IkappaB kinase complex;I-kappaB/NF-kappaB complex;intracellular membrane-bounded organelle;intracellular non-membrane-bounded organelle;intracellular organelle;intracellular organelle lumen;intracellular organelle part;intracellular part;mac…	12	12	12	35.4	35.4	35.4	52.443	0	66.024	876060000	56	27.3652	27.4411	27.5444	26.612	26.8027	26.8348
+	3.30743	0.915553	Q99MN9	Q99MN9	Propionyl-CoA carboxylase beta chain, mitochondrial	Pccb	Color2 [DarkGray]	1	4	cell part;cytoplasmic part;intracellular membrane-bounded organelle;intracellular organelle;intracellular organelle lumen;intracellular organelle part;intracellular part;membrane-bounded organelle;membrane-enclosed lumen;mitochondrial matrix;mitochondrial part;mitochondrion;organelle;organelle lumen;organelle part	24	24	24	60.6	60.6	60.6	58.408	0	195.09	3221900000	125	29.4898	29.3113	29.4286	28.3602	28.5192	28.6035
+	2.83835	1.01784	Q99MR8	Q99MR8	Methylcrotonoyl-CoA carboxylase subunit alpha, mitochondrial	Mccc1	Color2 [DarkGray]	1	4	3-methylcrotonyl-CoA carboxylase complex, mitochondrial;cell part;cytoplasmic part;intracellular membrane-bounded organelle;intracellular organelle;intracellular organelle lumen;intracellular organelle part;intracellular part;macromolecular complex;membrane;membrane-bounded organelle;membrane-enclosed lumen;mitochondrial inner membrane;mitochondrial matrix;mitochondrial membrane;mitochondrial par…	26	26	26	55	55	55	79.343	0	151.69	3726100000	142	29.5287	29.6047	29.7774	28.4076	28.6907	28.759
+	1.30773	0.858166	Q99MR9	Q99MR9	Protein phosphatase 1 regulatory subunit 3A	Ppp1r3a	Color2 [DarkGray]	1	4	cell part;integral to membrane;intrinsic to membrane;membrane part	13	13	13	19.1	19.1	19.1	121.43	0	31.924	257820000	28	25.5711	25.742	25.9138	24.3234	25.2999	25.029
+	1.05935	-0.789499	Q99MS7	Q99MS7	EH domain-binding protein 1-like protein 1	Ehbp1l1	Color2 [DarkGray]	1	4		19	19	18	16.4	16.4	16	184.83	0	37.083	339310000	22	25.5729	25.0331	24.9953	25.7034	26.5826	25.6838
+	0.792468	1.93776	Q99N89	Q99N89	39S ribosomal protein L43, mitochondrial	Mrpl43	Color2 [DarkGray]	1	4	cell part;cytoplasmic part;intracellular membrane-bounded organelle;intracellular organelle;intracellular organelle part;intracellular part;large ribosomal subunit;macromolecular complex;membrane-bounded organelle;mitochondrial large ribosomal subunit;mitochondrial part;mitochondrion;organellar large ribosomal subunit;organelle;organelle part;ribonucleoprotein complex	3	3	3	16.4	16.4	16.4	20.203	0	5.1629	198150000	8	24.9871	25.4219	25.1639	23.2447	21.3141	25.2008
+	2.79373	2.2927	Q99N92	Q99N92	39S ribosomal protein L27, mitochondrial	Mrpl27	Color2 [DarkGray]	1	4	cell part;cytoplasmic part;intracellular membrane-bounded organelle;intracellular organelle;intracellular organelle part;intracellular part;large ribosomal subunit;macromolecular complex;membrane-bounded organelle;mitochondrial large ribosomal subunit;mitochondrial part;mitochondrion;organellar large ribosomal subunit;organelle;organelle part;ribonucleoprotein complex	2	2	2	16.2	16.2	16.2	15.944	0	6.8759	98839000	7	24.7975	24.6959	24.8405	22.6835	22.8741	21.8983
+	1.84747	0.555782	Q99N94	Q99N94	39S ribosomal protein L9, mitochondrial	Mrpl9	Color2 [DarkGray]	1	4	cell part;cytoplasmic part;intracellular membrane-bounded organelle;intracellular non-membrane-bounded organelle;intracellular organelle;intracellular part;macromolecular complex;membrane-bounded organelle;mitochondrion;non-membrane-bounded organelle;organelle;ribonucleoprotein complex;ribosome	5	5	5	21.5	21.5	21.5	30.244	0	17.065	355600000	39	26.0817	26.0267	26.0626	25.4966	25.7335	25.2736
+	2.35948	0.551598	Q99N96	Q99N96	39S ribosomal protein L1, mitochondrial	Mrpl1	Color2 [DarkGray]	1	4	cell part;cytoplasmic part;intracellular membrane-bounded organelle;intracellular organelle;intracellular organelle part;intracellular part;large ribosomal subunit;macromolecular complex;membrane-bounded organelle;mitochondrial large ribosomal subunit;mitochondrial part;mitochondrion;nuclear part;nucleoplasm;organellar large ribosomal subunit;organelle;organelle part;ribonucleoprotein complex	5	5	5	22.6	22.6	22.6	37.596	0	13.744	253130000	20	25.5697	25.5413	25.6335	25.0476	25.1779	24.8642
+	2.51103	1.06561	Q99NB1	Q99NB1	Acetyl-coenzyme A synthetase 2-like, mitochondrial	Acss1	Color2 [DarkGray]	1	4	cell part;cytoplasmic part;intracellular membrane-bounded organelle;intracellular organelle;intracellular organelle lumen;intracellular organelle part;intracellular part;membrane-bounded organelle;membrane-enclosed lumen;mitochondrial matrix;mitochondrial part;mitochondrion;organelle;organelle lumen;organelle part	25	25	25	52.5	52.5	52.5	74.622	0	318.52	7956600000	178	30.6028	30.756	30.8968	29.4206	29.7244	29.9137
+	3.35846	-1.96661	Q99P72	Q99P72	Reticulon-4	Rtn4	Color2 [DarkGray]	1	4	cell part;cell projection;cytoplasmic part;endoplasmic reticulum;endoplasmic reticulum part;envelope;extracellular membrane-bounded organelle;extracellular organelle;extracellular region part;extracellular vesicular exosome;integral to endoplasmic reticulum membrane;integral to membrane;integral to organelle membrane;intracellular;intracellular membrane-bounded organelle;intracellular organelle;i…	27	27	27	39.4	39.4	39.4	126.61	0	278.8	2931400000	130	27.4485	27.3513	27.5304	29.6094	29.5636	29.0569
+	1.93617	0.480766	Q9CPP6	Q9CPP6	NADH dehydrogenase [ubiquinone] 1 alpha subcomplex subunit 5	Ndufa5	Color2 [DarkGray]	1	4	cell part;cytoplasmic part;intracellular membrane-bounded organelle;intracellular organelle;intracellular organelle part;intracellular part;macromolecular complex;membrane part;membrane-bounded organelle;mitochondrial membrane part;mitochondrial part;mitochondrial respiratory chain complex I;mitochondrion;NADH dehydrogenase complex;organelle;organelle part;protein complex;respiratory chain comple…	9	9	9	65.5	65.5	65.5	13.36	0	267.98	7639400000	140	30.3191	30.4883	30.4879	29.9028	29.819	30.1311
+	2.49018	0.66386	Q9CPQ8	Q9CPQ8	ATP synthase subunit g, mitochondrial	Atp5l	Color2 [DarkGray]	1	4	cell part;cytoplasmic part;intracellular organelle part;intracellular part;macromolecular complex;membrane part;mitochondrial membrane part;mitochondrial part;mitochondrial proton-transporting ATP synthase complex;mitochondrial proton-transporting ATP synthase complex, coupling factor F(o);organelle part;protein complex;proton-transporting ATP synthase complex;proton-transporting ATP synthase com…	7	7	7	56.3	56.3	56.3	11.424	0	103.29	25045000000	181	32.139	32.261	32.3435	31.4496	31.5556	31.7467
+	0.926378	1.5428	Q9CPR5	Q9CPR5	39S ribosomal protein L15, mitochondrial	Mrpl15	Color2 [DarkGray]	1	4	cell part;cytoplasmic part;intracellular membrane-bounded organelle;intracellular organelle;intracellular organelle part;intracellular part;large ribosomal subunit;macromolecular complex;membrane-bounded organelle;mitochondrial large ribosomal subunit;mitochondrial part;mitochondrion;organellar large ribosomal subunit;organelle;organelle part;ribonucleoprotein complex	6	6	6	23.1	23.1	23.1	33.541	0	12.342	177000000	14	25.4063	25.0197	25.3262	23.4367	22.532	25.1551
+	1.14355	1.20054	Q9CPS6	Q9CPS6	Histidine triad nucleotide-binding protein 3	Hint3	Color2 [DarkGray]	1	4	cell part;cytoplasm;cytoplasmic part;extracellular membrane-bounded organelle;extracellular organelle;extracellular region part;extracellular vesicular exosome;intracellular membrane-bounded organelle;intracellular non-membrane-bounded organelle;intracellular organelle;intracellular organelle part;intracellular part;membrane-bounded organelle;membrane-bounded vesicle;mitochondrion;non-membrane-bo…	4	4	4	35.2	35.2	35.2	18.787	0	8.9054	107970000	12	24.2945	24.4903	24.7472	22.4017	23.5177	24.011
+	2.54625	0.535098	Q9CPU4	Q9CPU4	Microsomal glutathione S-transferase 3	Mgst3	Color2 [DarkGray]	1	4	cell part;cytoplasmic part;endoplasmic reticulum;endoplasmic reticulum membrane;endoplasmic reticulum part;envelope;extracellular membrane-bounded organelle;extracellular organelle;extracellular region part;extracellular vesicular exosome;integral to membrane;intracellular membrane-bounded organelle;intracellular organelle;intracellular organelle part;intracellular part;intrinsic to membrane;memb…	6	6	6	39.2	39.2	39.2	16.958	0	73.028	1937100000	54	28.3347	28.4585	28.574	27.9853	27.8364	27.9403
+	1.09978	1.12579	Q9CPZ8	Q9CPZ8	COX assembly mitochondrial protein homolog	Cmc1	Color2 [DarkGray]	1	4	cell part;cytoplasmic part;intracellular membrane-bounded organelle;intracellular organelle;intracellular part;membrane-bounded organelle;mitochondrion;organelle	2	2	2	17.9	17.9	17.9	12.552	0.00038911	2.6713	95241000	5	24.7857	23.9461	24.338	23.4269	22.433	23.8326
+	2.90295	0.893499	Q9CQ62	Q9CQ62	2,4-dienoyl-CoA reductase, mitochondrial	Decr1	Color2 [DarkGray]	1	4	cell part;cytoplasm;cytoplasmic part;extracellular membrane-bounded organelle;extracellular organelle;extracellular region part;extracellular vesicular exosome;intracellular membrane-bounded organelle;intracellular organelle;intracellular organelle part;intracellular part;membrane-bounded organelle;membrane-bounded vesicle;mitochondrion;nuclear part;nucleoplasm;nucleus;organelle;organelle part;ve…	16	16	16	54	54	54	36.213	0	282.83	27152000000	284	32.4556	32.4785	32.4547	31.3853	31.558	31.765
+	2.79595	0.523444	Q9CQA3	Q9CQA3	Succinate dehydrogenase [ubiquinone] iron-sulfur subunit, mitochondrial	Sdhb	Color2 [DarkGray]	1	4	cell part;cytoplasmic part;extracellular membrane-bounded organelle;extracellular organelle;extracellular region part;extracellular vesicular exosome;fumarate reductase complex;intracellular membrane-bounded organelle;intracellular organelle;intracellular organelle part;intracellular part;macromolecular complex;membrane;membrane part;membrane-bounded organelle;membrane-bounded vesicle;mitochondri…	19	19	19	65.6	65.6	65.6	31.814	0	192.34	27214000000	312	32.2113	32.1959	32.4003	31.7847	31.7167	31.7358
+	2.02022	-0.548347	Q9CQB5	Q9CQB5	CDGSH iron-sulfur domain-containing protein 2	Cisd2	Color2 [DarkGray]	1	4	cell part;cytoplasmic part;endoplasmic reticulum;endoplasmic reticulum membrane;endoplasmic reticulum part;integral to membrane;intracellular membrane-bounded organelle;intracellular organelle;intracellular organelle part;intracellular part;intrinsic to membrane;macromolecular complex;membrane;membrane part;membrane-bounded organelle;mitochondrial membrane;mitochondrial outer membrane;mitochondri…	4	4	4	37	37	37	15.242	0	21.598	268500000	14	24.9701	25.0829	25.11	25.4761	25.5114	25.8206
+	1.8919	0.424124	Q9CQE3	Q9CQE3	28S ribosomal protein S17, mitochondrial	Mrps17	Color2 [DarkGray]	1	4	cell part;cytoplasmic part;intracellular membrane-bounded organelle;intracellular non-membrane-bounded organelle;intracellular organelle;intracellular part;macromolecular complex;membrane-bounded organelle;mitochondrion;non-membrane-bounded organelle;organelle;ribonucleoprotein complex;ribosome	2	2	2	27.5	27.5	27.5	13.382	0	12.198	157770000	13	24.7964	24.8016	24.9275	24.405	24.5783	24.2698
+	1.39656	1.97611	Q9CQF4	Q9CQF4	Uncharacterized protein C6orf203 homolog		Color2 [DarkGray]	1	4	cell part;cytoplasmic part;intracellular membrane-bounded organelle;intracellular organelle;intracellular part;membrane-bounded organelle;mitochondrion;organelle	3	3	3	9.2	9.2	9.2	27.847	0	20.29	144580000	8	24.9881	25.2016	24.7629	22.576	22.167	24.2813
+	2.97999	0.736107	Q9CQH3	Q9CQH3	NADH dehydrogenase [ubiquinone] 1 beta subcomplex subunit 5, mitochondrial	Ndufb5	Color2 [DarkGray]	1	4	cell part;cytoplasmic part;integral to membrane;intracellular membrane-bounded organelle;intracellular organelle;intracellular organelle part;intracellular part;intrinsic to membrane;macromolecular complex;membrane;membrane part;membrane-bounded organelle;mitochondrial inner membrane;mitochondrial membrane;mitochondrial membrane part;mitochondrial part;mitochondrial respiratory chain complex I;mi…	11	11	11	34.9	34.9	34.9	21.71	0	134.43	7119400000	140	30.4993	30.5484	30.3567	29.7953	29.6027	29.798
+	0.998397	2.3729	Q9CQJ1	Q9CQJ1	HIG1 domain family member 2A	Higd2a	Color2 [DarkGray]	1	4	cell part;cytoplasmic part;integral to membrane;intracellular membrane-bounded organelle;intracellular organelle;intracellular organelle part;intracellular part;intrinsic to membrane;membrane;membrane part;membrane-bounded organelle;mitochondrial inner membrane;mitochondrial membrane;mitochondrial part;mitochondrion;organelle;organelle inner membrane;organelle membrane;organelle part	3	3	3	58.5	58.5	58.5	11.368	0	16.627	226650000	4	25.5743	25.8868	25.9123	22.4897	22.1371	25.6278
+	1.60756	0.496244	Q9CQJ8	Q9CQJ8	NADH dehydrogenase [ubiquinone] 1 beta subcomplex subunit 9	Ndufb9	Color2 [DarkGray]	1	4	cell part;cytoplasmic part;extracellular membrane-bounded organelle;extracellular organelle;extracellular region part;extracellular vesicular exosome;intracellular membrane-bounded organelle;intracellular organelle;intracellular organelle part;intracellular part;macromolecular complex;membrane;membrane part;membrane-bounded organelle;membrane-bounded vesicle;mitochondrial inner membrane;mitochond…	12	12	12	68.7	68.7	68.7	21.984	0	215.61	11489000000	262	30.9932	31.0481	31.1099	30.4056	30.4284	30.8285
+	2.2959	0.524463	Q9CQL4	Q9CQL4	39S ribosomal protein L20, mitochondrial	Mrpl20	Color2 [DarkGray]	1	4	cell part;cytoplasmic part;intracellular membrane-bounded organelle;intracellular non-membrane-bounded organelle;intracellular organelle;intracellular organelle part;intracellular part;large ribosomal subunit;macromolecular complex;membrane-bounded organelle;mitochondrial large ribosomal subunit;mitochondrial part;mitochondrial ribosome;mitochondrion;non-membrane-bounded organelle;organellar larg…	3	3	3	28.2	28.2	28.2	17.595	0	5.5999	87521000	9	23.974	23.9886	24.2109	23.4517	23.5118	23.6365
+	2.50927	-0.608023	Q9CQM9	Q9CQM9	Glutaredoxin-3	Glrx3	Color2 [DarkGray]	1	4	cell cortex;cell part;contractile fiber part;cytoplasmic part;extracellular membrane-bounded organelle;extracellular organelle;extracellular region part;extracellular vesicular exosome;intracellular part;membrane-bounded organelle;membrane-bounded vesicle;organelle;organelle part;vesicle;Z disc	14	14	14	50.4	50.4	50.4	37.778	0	109.75	1967400000	68	27.9937	27.9417	27.7668	28.3827	28.6065	28.537
+	2.70405	0.647234	Q9CQN1	Q9CQN1	Heat shock protein 75 kDa, mitochondrial	Trap1	Color2 [DarkGray]	1	4	cell part;cytoplasmic part;extracellular membrane-bounded organelle;extracellular organelle;extracellular region part;extracellular vesicular exosome;intracellular membrane-bounded organelle;intracellular organelle;intracellular organelle lumen;intracellular organelle part;intracellular part;lipid particle;membrane;membrane-bounded organelle;membrane-bounded vesicle;membrane-enclosed lumen;mitoch…	22	22	22	42.8	42.8	42.8	80.208	0	186.39	2961200000	134	29.2029	29.143	29.1873	28.3542	28.6174	28.6199
+	2.47956	0.650417	Q9CQR4	Q9CQR4	Acyl-coenzyme A thioesterase 13;Acyl-coenzyme A thioesterase 13, N-terminally processed	Acot13	Color2 [DarkGray]	1	4	cell part;cytoplasmic part;cytoskeletal part;cytosol;extracellular membrane-bounded organelle;extracellular organelle;extracellular region part;extracellular vesicular exosome;intracellular membrane-bounded organelle;intracellular non-membrane-bounded organelle;intracellular organelle;intracellular organelle part;intracellular part;membrane-bounded organelle;membrane-bounded vesicle;mitochondrion…	6	6	6	62.1	62.1	62.1	15.183	0	68.878	8019400000	114	30.6133	30.6998	30.3566	29.9306	29.8997	29.8882
+	3.65626	-1.21795	Q9CQU3	Q9CQU3	Protein RER1	Rer1	Color2 [DarkGray]	1	4	cell part;cell surface;cytoplasmic part;endoplasmic reticulum-Golgi intermediate compartment;Golgi apparatus;Golgi apparatus part;integral to Golgi membrane;integral to membrane;integral to organelle membrane;intracellular membrane-bounded organelle;intracellular organelle;intracellular organelle part;intracellular part;intrinsic to Golgi membrane;intrinsic to membrane;intrinsic to organelle memb…	3	3	3	19.4	19.4	19.4	22.988	0	5.6002	174190000	11	24.1046	24.0383	23.8192	25.2477	25.2464	25.1218
+	0.947543	2.57736	Q9CQV1	Q9CQV1	Mitochondrial import inner membrane translocase subunit TIM16	Pam16	Color2 [DarkGray]	1	4	cell part;cytoplasmic part;intracellular organelle part;intracellular part;macromolecular complex;membrane part;mitochondrial inner membrane presequence translocase complex;mitochondrial membrane part;mitochondrial part;organelle part;protein complex	4	4	4	46.4	46.4	46.4	13.784	0	45.691	404570000	13	26.4095	26.6636	26.2726	23.1395	22.1351	26.3391
+	2.58459	0.848782	Q9CQV7	Q9CQV7	Mitochondrial import inner membrane translocase subunit TIM14	Dnajc19	Color2 [DarkGray]	1	4	cell part;cytoplasmic part;integral to membrane;intracellular organelle part;intracellular part;intrinsic to membrane;membrane;membrane part;mitochondrial inner membrane;mitochondrial membrane;mitochondrial part;organelle inner membrane;organelle membrane;organelle part	4	4	4	42.2	42.2	42.2	12.436	0	8.106	172310000	18	25.1409	25.2361	25.0901	24.0679	24.4301	24.4228
+	2.40646	1.67123	Q9CQY6	Q9CQY6	Ubiquinol-cytochrome-c reductase complex assembly factor 2	Uqcc2	Color2 [DarkGray]	1	4	cell part;cytoplasmic part;intracellular membrane-bounded organelle;intracellular non-membrane-bounded organelle;intracellular organelle;intracellular organelle lumen;intracellular organelle part;intracellular part;membrane;membrane-bounded organelle;membrane-enclosed lumen;mitochondrial inner membrane;mitochondrial intermembrane space;mitochondrial matrix;mitochondrial membrane;mitochondrial nuc…	4	4	4	42.6	42.6	42.6	16.32	0	9.9722	160790000	6	25.3933	24.8696	25.5187	23.9456	23.2686	23.5537
+	1.81101	0.435653	Q9CR24	Q9CR24	Nucleoside diphosphate-linked moiety X motif 8, mitochondrial	Nudt8	Color2 [DarkGray]	1	4	cell part;cytoplasmic part;intracellular membrane-bounded organelle;intracellular organelle;intracellular part;membrane-bounded organelle;mitochondrion;organelle	5	5	5	32.9	32.9	32.9	23.252	0	17.574	361030000	27	25.9848	26.2028	25.9873	25.4983	25.5986	25.771
+	3.13866	-2.40246	Q9CR42	Q9CR42	Ankyrin repeat domain-containing protein 1	Ankrd1	Color2 [DarkGray]	1	4	cell part;contractile fiber;contractile fiber part;cytoplasm;cytoplasmic part;cytosol;I band;intracellular membrane-bounded organelle;intracellular non-membrane-bounded organelle;intracellular organelle;intracellular organelle part;intracellular part;macromolecular complex;membrane-bounded organelle;myofibril;non-membrane-bounded organelle;nuclear part;nucleolus;nucleoplasm part;nucleus;organelle…	6	6	6	24.8	24.8	24.8	36.003	0	39.682	321640000	38	23.5764	23.7887	24.3486	26.3923	26.4465	26.0822
+	0.952798	1.95694	Q9CR51	Q9CR51	V-type proton ATPase subunit G 1	Atp6v1g1	Color2 [DarkGray]	1	4	cell part;cytoplasmic part;cytosol;extracellular membrane-bounded organelle;extracellular organelle;extracellular region part;extracellular vesicular exosome;intracellular;intracellular organelle part;intracellular part;lysosomal membrane;macromolecular complex;membrane;membrane part;membrane-bounded organelle;membrane-bounded vesicle;organelle;organelle membrane;organelle part;plasma membrane;pr…	2	2	2	22	22	22	13.724	0	8.58	184500000	9	25.2566	25.224	25.2911	22.8208	25.1521	21.928
+	2.75889	0.478695	Q9CR61	Q9CR61	NADH dehydrogenase [ubiquinone] 1 beta subcomplex subunit 7	Ndufb7	Color2 [DarkGray]	1	4	cell part;cytoplasmic part;intracellular membrane-bounded organelle;intracellular organelle;intracellular organelle part;intracellular part;macromolecular complex;membrane;membrane part;membrane-bounded organelle;membrane-enclosed lumen;mitochondrial inner membrane;mitochondrial intermembrane space;mitochondrial membrane;mitochondrial membrane part;mitochondrial part;mitochondrial respiratory cha…	11	11	11	72.3	72.3	72.3	16.331	0	94.847	5997600000	190	30.0247	29.9582	30.1622	29.5992	29.5242	29.5856
+	2.95657	0.827933	Q9CR62	Q9CR62	Mitochondrial 2-oxoglutarate/malate carrier protein	Slc25a11	Color2 [DarkGray]	1	4	cell part;cytoplasmic part;integral to membrane;intracellular membrane-bounded organelle;intracellular organelle;intracellular organelle part;intracellular part;intrinsic to membrane;membrane;membrane part;membrane-bounded organelle;mitochondrial inner membrane;mitochondrial membrane;mitochondrial part;mitochondrion;nucleus;organelle;organelle inner membrane;organelle membrane;organelle part	16	16	16	58	58	58	34.155	0	216.31	17079000000	215	31.6945	31.8044	31.7965	30.7954	30.9061	31.1101
+	3.41481	0.549988	Q9CR68	Q9CR68	Cytochrome b-c1 complex subunit Rieske, mitochondrial;Cytochrome b-c1 complex subunit 11	Uqcrfs1	Color2 [DarkGray]	1	4	cell part;cytoplasmic part;intracellular membrane-bounded organelle;intracellular organelle;intracellular organelle part;intracellular part;macromolecular complex;membrane;membrane part;membrane-bounded organelle;mitochondrial inner membrane;mitochondrial membrane;mitochondrial membrane part;mitochondrial part;mitochondrial respiratory chain complex III;mitochondrion;myelin sheath;organelle;organ…	20	20	20	69.7	69.7	69.7	29.367	0	295.33	34716000000	316	32.6206	32.62	32.6889	32.0912	32.0174	32.171
+	1.93976	0.73818	Q9CRA7	Q9CRA7	ATP synthase subunit s, mitochondrial	Atp5s	Color2 [DarkGray]	1	4	cell part;cytoplasmic part;intracellular membrane-bounded organelle;intracellular organelle;intracellular organelle part;intracellular part;macromolecular complex;membrane;membrane part;membrane-bounded organelle;mitochondrial inner membrane;mitochondrial membrane;mitochondrial part;mitochondrion;organelle;organelle inner membrane;organelle membrane;organelle part;protein complex;proton-transport…	6	6	6	36.5	36.5	36.5	23.275	0	14.264	1013800000	21	27.5645	27.4117	27.9207	26.8901	26.7723	27.02
+	1.93632	0.872742	Q9CRB8	Q9CRB8	Mitochondrial fission process protein 1	Mtfp1	Color2 [DarkGray]	1	4	cell part;cytoplasmic part;integral to membrane;intracellular membrane-bounded organelle;intracellular organelle;intracellular organelle part;intracellular part;intrinsic to membrane;membrane;membrane part;membrane-bounded organelle;mitochondrial inner membrane;mitochondrial membrane;mitochondrial part;mitochondrion;organelle;organelle inner membrane;organelle membrane;organelle part	7	7	7	52.4	52.4	52.4	18.314	0	28.329	1111300000	24	28.0376	27.682	27.7801	26.6804	26.943	27.258
+	1.21716	-0.987213	Q9CS72	Q9CS72	Filamin-A-interacting protein 1	Filip1	Color2 [DarkGray]	1	4	cell part;cytoplasm;cytoskeleton;intracellular non-membrane-bounded organelle;intracellular organelle;intracellular part;non-membrane-bounded organelle;organelle	5	5	5	5.5	5.5	5.5	137.6	0	5.8234	37464000	5	22.8186	22.0658	22.2445	23.9747	23.028	23.088
+	2.03041	-0.644387	Q9CVB6	Q9CVB6	Actin-related protein 2/3 complex subunit 2	Arpc2	Color2 [DarkGray]	1	4	adherens junction;anchoring junction;Arp2/3 protein complex;cell junction;cell leading edge;cell part;cell projection;cell-substrate adherens junction;cell-substrate junction;cytoplasm;cytoplasmic part;cytoskeletal part;endosome;extracellular membrane-bounded organelle;extracellular organelle;extracellular region part;extracellular vesicular exosome;focal adhesion;Golgi apparatus;intracellular me…	13	13	13	38	38	38	34.357	0	54.659	1233300000	60	27.0479	27.1623	27.3894	27.8105	28.0205	27.7018
+	2.0119	-0.624432	Q9CWF2	Q9CWF2	Tubulin beta-2B chain	Tubb2b	Color2 [DarkGray]	1	4	cell part;cytoplasm;cytoskeletal part;intracellular membrane-bounded organelle;intracellular organelle;intracellular organelle part;intracellular part;macromolecular complex;membrane-bounded organelle;microtubule;nucleus;organelle;organelle part;protein complex	24	6	1	74.2	20.9	2.7	49.953	0	167.73	2185200000	58	28.0229	27.8248	28.2003	28.6976	28.483	28.7406
+	0.898472	1.81034	Q9CWU6	Q9CWU6	Ubiquinol-cytochrome-c reductase complex assembly factor 1	Uqcc1	Color2 [DarkGray]	1	4	cell part;cytoplasmic membrane-bounded vesicle;cytoplasmic part;cytoplasmic vesicle;intracellular membrane-bounded organelle;intracellular organelle;intracellular organelle part;intracellular part;membrane;membrane-bounded organelle;membrane-bounded vesicle;mitochondrial inner membrane;mitochondrial membrane;mitochondrial part;mitochondrion;organelle;organelle inner membrane;organelle membrane;or…	3	3	3	9.5	9.5	9.5	34.299	0	8.9023	159340000	6	25.308	25.4237	25.1347	22.2605	22.8562	25.3185
+	3.04271	-1.45151	Q9CWZ7	Q9CWZ7	Gamma-soluble NSF attachment protein	Napg	Color2 [DarkGray]	1	4	cell part;cytoplasmic part;extracellular membrane-bounded organelle;extracellular organelle;extracellular region part;extracellular vesicular exosome;intracellular membrane-bounded organelle;intracellular organelle;intracellular organelle part;intracellular part;lysosomal membrane;macromolecular complex;membrane;membrane part;membrane-bounded organelle;membrane-bounded vesicle;mitochondrion;myeli…	3	3	3	12.5	12.5	12.5	34.732	0	11.74	69135000	8	22.2888	22.6744	22.2275	24.0009	23.7024	23.8419
+	1.82129	-0.525286	Q9CX34	Q9CX34	Suppressor of G2 allele of SKP1 homolog	Sugt1	Color2 [DarkGray]	1	4	cell part;cytoplasm;intracellular membrane-bounded organelle;intracellular organelle;intracellular part;membrane-bounded organelle;nucleus;organelle	7	7	7	28.6	28.6	28.6	38.158	0	28.045	212860000	13	24.7978	24.5973	24.7412	25.017	25.2965	25.3986
+	2.73076	0.511229	Q9CXJ4	Q9CXJ4	ATP-binding cassette sub-family B member 8, mitochondrial	Abcb8	Color2 [DarkGray]	1	4	cell part;cytoplasmic part;integral to membrane;intracellular membrane-bounded organelle;intracellular non-membrane-bounded organelle;intracellular organelle;intracellular organelle part;intracellular part;intrinsic to membrane;membrane;membrane part;membrane-bounded organelle;mitochondrial inner membrane;mitochondrial membrane;mitochondrial part;mitochondrion;non-membrane-bounded organelle;nucle…	13	13	13	25.5	25.5	25.5	77.999	0	40.718	938310000	71	27.3988	27.4297	27.4933	26.8013	26.9876	26.9992
+	1.74697	0.48782	Q9CY73	Q9CY73	39S ribosomal protein L44, mitochondrial	Mrpl44	Color2 [DarkGray]	1	4	cell part;cytoplasmic part;intracellular membrane-bounded organelle;intracellular non-membrane-bounded organelle;intracellular organelle;intracellular part;macromolecular complex;membrane-bounded organelle;mitochondrion;non-membrane-bounded organelle;organelle;ribonucleoprotein complex;ribosome	7	7	7	21	21	21	37.527	0	27.071	247110000	29	25.4654	25.4948	25.6053	25.2182	25.0708	24.8129
+	1.99881	-2.03961	Q9CYR6	Q9CYR6	Phosphoacetylglucosamine mutase	Pgm3	Color2 [DarkGray]	1	4	cell part;cytoplasmic part;cytosol;intracellular part	3	3	3	9	9	9	59.452	0	8.9923	59778000	4	21.3481	22.7229	21.8603	24.3052	23.6616	24.0833
+	1.97924	-0.56506	Q9CYT6	Q9CYT6	Adenylyl cyclase-associated protein 2	Cap2	Color2 [DarkGray]	1	4	cell part;membrane;plasma membrane	16	16	15	45.8	45.8	44.1	52.861	0	75.476	1832800000	63	27.711	27.7554	28.0613	28.3757	28.5201	28.327
+	1.08169	-2.82173	Q9CZ04	Q9CZ04	COP9 signalosome complex subunit 7a	Cops7a	Color2 [DarkGray]	1	4	cell part;cytoplasm;intracellular organelle part;intracellular part;macromolecular complex;nuclear part;nucleoplasm;organelle part;protein complex;signalosome	5	5	5	24.4	24.4	24.4	30.224	0	19.291	168820000	10	24.349	21.8063	20.138	25.0026	24.9754	24.7804
+	2.02031	0.498774	Q9CZ13	Q9CZ13	Cytochrome b-c1 complex subunit 1, mitochondrial	Uqcrc1	Color2 [DarkGray]	1	4	cell part;cytoplasmic part;intracellular membrane-bounded organelle;intracellular organelle;intracellular organelle part;intracellular part;macromolecular complex;membrane;membrane part;membrane-bounded organelle;mitochondrial inner membrane;mitochondrial membrane;mitochondrial membrane part;mitochondrial part;mitochondrial respiratory chain complex III;mitochondrion;myelin sheath;organelle;organ…	26	26	25	64.6	64.6	63.1	52.851	0	323.31	85615000000	602	33.7306	33.9643	34.0557	33.3383	33.4208	33.4951
+	3.35159	0.602584	Q9CZJ2	Q9CZJ2	Heat shock 70 kDa protein 12B	Hspa12b	Color2 [DarkGray]	1	4		9	9	9	16.2	16.2	16.2	76.118	0	16.658	382710000	28	26.3194	26.1932	26.1313	25.6297	25.5878	25.6185
+	2.00333	-0.828956	Q9CZM2	Q9CZM2	60S ribosomal protein L15	Rpl15	Color2 [DarkGray]	1	4	cell part;cytosolic large ribosomal subunit;extracellular membrane-bounded organelle;extracellular organelle;extracellular region part;extracellular vesicular exosome;intracellular membrane-bounded organelle;intracellular organelle;intracellular organelle part;intracellular part;large ribosomal subunit;macromolecular complex;membrane-bounded organelle;membrane-bounded vesicle;nucleus;organelle;or…	10	10	10	43.1	43.1	43.1	24.146	0	34.841	2277100000	43	28.0303	28.1658	27.7166	28.5604	28.9468	28.8923
+	2.61616	0.741172	Q9CZR8	Q9CZR8	Elongation factor Ts, mitochondrial	Tsfm	Color2 [DarkGray]	1	4	cell part;cytoplasmic part;intracellular membrane-bounded organelle;intracellular organelle;intracellular organelle lumen;intracellular organelle part;intracellular part;membrane-bounded organelle;membrane-enclosed lumen;mitochondrial matrix;mitochondrial part;mitochondrion;nuclear part;nucleoplasm;nucleus;organelle;organelle lumen;organelle part	8	8	8	37	37	37	35.334	0	85.602	1071500000	49	27.5621	27.9062	27.7494	26.9274	27.0786	26.9882
+	2.13286	0.519314	Q9CZS1	Q9CZS1	Aldehyde dehydrogenase X, mitochondrial	Aldh1b1	Color2 [DarkGray]	1	4	cell part;cytoplasmic part;intracellular membrane-bounded organelle;intracellular organelle;intracellular organelle lumen;intracellular organelle part;intracellular part;membrane-bounded organelle;membrane-enclosed lumen;mitochondrial matrix;mitochondrial part;mitochondrion;nuclear part;nucleoplasm;organelle;organelle lumen;organelle part	24	24	20	52.8	52.8	48.2	57.552	0	184.23	5007100000	162	29.8136	29.7505	29.9449	29.2289	29.4891	29.2331
+	1.99521	0.607858	Q9CZU6	Q9CZU6	Citrate synthase, mitochondrial	Cs	Color2 [DarkGray]	1	4	cell part;cytoplasmic part;extracellular membrane-bounded organelle;extracellular organelle;extracellular region part;extracellular vesicular exosome;intracellular membrane-bounded organelle;intracellular organelle;intracellular organelle lumen;intracellular organelle part;intracellular part;membrane-bounded organelle;membrane-bounded vesicle;membrane-enclosed lumen;mitochondrial matrix;mitochond…	23	23	23	53.2	53.2	53.2	51.736	0	323.31	93546000000	440	34.2159	34.0263	33.997	33.3939	33.3266	33.6951
+	2.74476	0.768119	Q9D020	Q9D020	Cytosolic 5-nucleotidase 3A	Nt5c3a	Color2 [DarkGray]	1	4	cell part;cytoplasm;cytoplasmic part;endoplasmic reticulum;intracellular membrane-bounded organelle;intracellular organelle;intracellular part;membrane-bounded organelle;mitochondrion;organelle	12	12	12	45.6	45.6	45.6	37.252	0	45.197	1134100000	43	27.7562	27.8804	27.922	26.909	27.2163	27.129
+	2.91189	0.99944	Q9D023	Q9D023	Mitochondrial pyruvate carrier 2	Mpc2	Color2 [DarkGray]	1	4	cell part;cytoplasmic part;integral to membrane;intracellular membrane-bounded organelle;intracellular organelle;intracellular organelle part;intracellular part;intrinsic to membrane;membrane;membrane part;membrane-bounded organelle;mitochondrial inner membrane;mitochondrial membrane;mitochondrial part;mitochondrion;nucleus;organelle;organelle inner membrane;organelle membrane;organelle part	8	8	8	46.5	46.5	46.5	14.286	0	46.453	9564900000	123	31.0823	30.9419	30.8296	29.9311	29.793	30.1312
+	1.55347	-0.56531	Q9D024	Q9D024	Coiled-coil domain-containing protein 47	Ccdc47	Color2 [DarkGray]	1	4	cell part;cytoplasmic part;endoplasmic reticulum;integral to membrane;intracellular membrane-bounded organelle;intracellular organelle;intracellular part;intrinsic to membrane;membrane;membrane part;membrane-bounded organelle;organelle;rough endoplasmic reticulum	6	6	6	13.3	13.3	13.3	55.843	0	9.3671	168280000	15	24.4189	24.3961	24.4517	24.8876	25.3132	24.7619
+	2.50743	0.661602	Q9D051	Q9D051	Pyruvate dehydrogenase E1 component subunit beta, mitochondrial	Pdhb	Color2 [DarkGray]	1	4	cell part;cytoplasmic part;extracellular membrane-bounded organelle;extracellular organelle;extracellular region part;extracellular vesicular exosome;intracellular membrane-bounded organelle;intracellular organelle;intracellular organelle lumen;intracellular organelle part;intracellular part;macromolecular complex;membrane-bounded organelle;membrane-bounded vesicle;membrane-enclosed lumen;mitocho…	18	18	18	68	68	68	38.937	0	323.31	60391000000	419	33.4644	33.381	33.6485	32.7452	32.7962	32.9677
+	3.33314	0.546104	Q9D0F9	Q9D0F9	Phosphoglucomutase-1	Pgm1	Color2 [DarkGray]	1	4	actin cytoskeleton;cell part;cytoplasmic part;cytoskeleton;cytosol;extracellular membrane-bounded organelle;extracellular organelle;extracellular region part;extracellular vesicular exosome;intracellular non-membrane-bounded organelle;intracellular organelle;intracellular part;membrane-bounded organelle;membrane-bounded vesicle;non-membrane-bounded organelle;organelle;vesicle	31	31	31	71.5	71.5	71.5	61.417	0	217.37	12469000000	252	31.1223	31.2613	31.1745	30.5755	30.6637	30.6806
+	1.94627	0.536569	Q9D0J4	Q9D0J4	ADP-ribosylation factor-like protein 2	Arl2	Color2 [DarkGray]	1	4	cell part;centrosome;cytoplasm;cytoplasmic part;cytoskeletal part;extracellular membrane-bounded organelle;extracellular organelle;extracellular region part;extracellular vesicular exosome;intracellular membrane-bounded organelle;intracellular non-membrane-bounded organelle;intracellular organelle;intracellular organelle part;intracellular part;lateral plasma membrane;membrane part;membrane-bound…	2	2	2	12	12	12	20.864	0	3.0694	41513000	5	22.9709	23.1881	23.1898	22.4159	22.5732	22.7499
+	1.32486	1.84628	Q9D0L4	Q9D0L4	Uncharacterized aarF domain-containing protein kinase 1	Adck1	Color2 [DarkGray]	1	4	cell part;cytoplasmic part;extracellular region;intracellular membrane-bounded organelle;intracellular organelle;intracellular part;membrane-bounded organelle;mitochondrion;organelle	5	5	5	13.9	13.9	13.9	59.735	0	16.424	139750000	11	24.8005	25.27	25.1483	22.8507	22.3605	24.4688
+	1.7403	0.475449	Q9D0M3	Q9D0M3	Cytochrome c1, heme protein, mitochondrial	Cyc1	Color2 [DarkGray]	1	4	cell part;cytoplasmic part;integral to membrane;intracellular membrane-bounded organelle;intracellular organelle;intracellular organelle part;intracellular part;intrinsic to membrane;membrane;membrane part;membrane-bounded organelle;mitochondrial inner membrane;mitochondrial membrane;mitochondrial part;mitochondrion;nucleus;organelle;organelle inner membrane;organelle membrane;organelle part;resp…	19	19	19	49.8	49.8	49.8	35.327	0	323.31	27770000000	292	32.3076	32.2308	32.3097	31.7131	31.6622	32.0464
+	2.54316	0.682659	Q9D0Q7	Q9D0Q7	39S ribosomal protein L45, mitochondrial	Mrpl45	Color2 [DarkGray]	1	4	cell part;cytoplasmic part;intracellular membrane-bounded organelle;intracellular non-membrane-bounded organelle;intracellular organelle;intracellular part;macromolecular complex;membrane-bounded organelle;mitochondrion;non-membrane-bounded organelle;organelle;ribonucleoprotein complex;ribosome	6	6	6	30.4	30.4	30.4	35.41	0	17.329	358020000	20	25.9904	26.1671	26.2654	25.4099	25.3742	25.5909
+	1.2099	-0.681679	Q9D0R2	Q9D0R2	Threonine--tRNA ligase, cytoplasmic	Tars	Color2 [DarkGray]	1	4	actin cytoskeleton;cell part;cytoplasm;cytoskeleton;extracellular membrane-bounded organelle;extracellular organelle;extracellular region part;extracellular vesicular exosome;intracellular non-membrane-bounded organelle;intracellular organelle;intracellular part;membrane-bounded organelle;membrane-bounded vesicle;non-membrane-bounded organelle;organelle;vesicle	12	12	11	21.6	21.6	20.5	83.355	0	21.282	417900000	41	25.9105	25.7032	25.0731	26.0819	26.3447	26.3053
+	3.1111	1.01996	Q9D172	Q9D172	ES1 protein homolog, mitochondrial	D10Jhu81e	Color2 [DarkGray]	1	4	cell part;cytoplasmic part;intracellular membrane-bounded organelle;intracellular organelle;intracellular part;membrane-bounded organelle;mitochondrion;organelle	12	12	12	58.3	58.3	58.3	28.09	0	255.68	12739000000	202	31.3824	31.4683	31.412	30.195	30.5598	30.448
+	1.91063	-0.662233	Q9D1D4	Q9D1D4	Transmembrane emp24 domain-containing protein 10	Tmed10	Color2 [DarkGray]	1	4	cell part;cis-Golgi network;clathrin-coated vesicle;coated vesicle;COPI-coated vesicle;cytoplasmic membrane-bounded vesicle;cytoplasmic part;cytoplasmic vesicle;cytoplasmic vesicle membrane;cytoplasmic vesicle part;endoplasmic reticulum;endoplasmic reticulum membrane;endoplasmic reticulum part;endoplasmic reticulum-Golgi intermediate compartment;endoplasmic reticulum-Golgi intermediate compartmen…	6	6	6	32	32	32	24.911	0	48.218	1545800000	37	27.5486	27.2753	27.7584	28.31	28.1505	28.1086
+	0.819157	-1.57164	Q9D1E6	Q9D1E6	Tubulin-folding cofactor B	Tbcb	Color2 [DarkGray]	1	4	cell part;cytoplasm;cytoskeletal part;intracellular organelle part;intracellular part;macromolecular complex;microtubule;nuclear part;nucleoplasm;organelle part;protein complex	5	5	5	23	23	23	27.385	0	7.8569	131820000	12	23.3717	21.5392	24.5347	24.5677	25.0619	24.531
+	2.04088	0.870036	Q9D1G3	Q9D1G3	Protein-cysteine N-palmitoyltransferase HHAT-like protein	Hhatl	Color2 [DarkGray]	1	4	cell part;cytoplasmic part;endoplasmic reticulum;endoplasmic reticulum membrane;endoplasmic reticulum part;integral to membrane;intracellular membrane-bounded organelle;intracellular organelle;intracellular organelle part;intracellular part;intrinsic to membrane;membrane;membrane part;membrane-bounded organelle;organelle;organelle membrane;organelle part;perinuclear region of cytoplasm	10	10	10	19.7	19.7	19.7	56.43	0	33.779	1055400000	48	27.7253	27.6773	27.9645	26.6407	26.9176	27.1986
+	1.63295	0.579672	Q9D1H6	Q9D1H6	NADH dehydrogenase [ubiquinone] 1 alpha subcomplex assembly factor 4	Ndufaf4	Color2 [DarkGray]	1	4	cell part;cytoplasmic part;intracellular membrane-bounded organelle;intracellular organelle;intracellular organelle part;intracellular part;membrane;membrane-bounded organelle;mitochondrial membrane;mitochondrial part;mitochondrion;organelle;organelle membrane;organelle part	6	6	6	33.5	33.5	33.5	20.082	0	20.841	528480000	30	26.5665	26.6641	26.7447	25.8106	26.0825	26.3432
+	1.77194	0.557466	Q9D1H8	Q9D1H8	39S ribosomal protein L53, mitochondrial	Mrpl53	Color2 [DarkGray]	1	4	cell part;cytoplasmic part;intracellular membrane-bounded organelle;intracellular non-membrane-bounded organelle;intracellular organelle;intracellular part;macromolecular complex;membrane-bounded organelle;mitochondrion;non-membrane-bounded organelle;organelle;ribonucleoprotein complex;ribosome	3	3	3	34.7	34.7	34.7	12.737	0	8.5337	219740000	13	25.1671	25.3032	25.4999	24.8605	24.8776	24.5598
+	1.86476	0.673134	Q9D1I5	Q9D1I5	Methylmalonyl-CoA epimerase, mitochondrial	Mcee	Color2 [DarkGray]	1	4	cell part;cytoplasmic part;intracellular membrane-bounded organelle;intracellular organelle;intracellular part;membrane-bounded organelle;mitochondrion;organelle	6	6	6	54.5	54.5	54.5	19.017	0	47.736	1022200000	26	27.5065	27.5429	27.9713	26.8894	27.0851	27.0269
+	1.71868	0.808505	Q9D1I6	Q9D1I6	39S ribosomal protein L14, mitochondrial	Mrpl14	Color2 [DarkGray]	1	4	cell part;cytoplasmic part;intracellular membrane-bounded organelle;intracellular non-membrane-bounded organelle;intracellular organelle;intracellular part;macromolecular complex;membrane-bounded organelle;mitochondrion;non-membrane-bounded organelle;organelle;ribonucleoprotein complex;ribosome	5	5	5	36.6	36.6	36.6	15.874	0	9.2243	279210000	26	25.7547	25.9283	25.7713	25.2683	25.1568	24.6037
+	0.973943	-1.30664	Q9D1M4	Q9D1M4	Eukaryotic translation elongation factor 1 epsilon-1	Eef1e1	Color2 [DarkGray]	1	4	aminoacyl-tRNA synthetase multienzyme complex;cell part;cytoplasm;extracellular membrane-bounded organelle;extracellular organelle;extracellular region part;extracellular vesicular exosome;intracellular membrane-bounded organelle;intracellular organelle;intracellular part;macromolecular complex;membrane-bounded organelle;membrane-bounded vesicle;nucleus;organelle;protein complex;vesicle	5	5	5	29.3	29.3	29.3	19.859	0	9.8178	97761000	6	22.4894	22.9813	24.5678	24.6306	24.592	24.7358
+	0.964805	1.47561	Q9D1N9	Q9D1N9	39S ribosomal protein L21, mitochondrial	Mrpl21	Color2 [DarkGray]	1	4	cell part;cytoplasmic part;intracellular membrane-bounded organelle;intracellular non-membrane-bounded organelle;intracellular organelle;intracellular part;macromolecular complex;membrane-bounded organelle;mitochondrion;non-membrane-bounded organelle;organelle;ribonucleoprotein complex;ribosome	3	3	3	16.7	16.7	16.7	23.366	0	7.5802	128800000	6	24.4558	24.4649	25.0984	22.4623	22.566	24.5641
+	2.32975	-0.768809	Q9D1R9	Q9D1R9	60S ribosomal protein L34	Rpl34	Color2 [DarkGray]	1	4	cell part;cytoplasmic part;intracellular non-membrane-bounded organelle;intracellular organelle;intracellular part;macromolecular complex;non-membrane-bounded organelle;organelle;ribonucleoprotein complex;ribosome	3	3	3	20.5	20.5	20.5	13.293	0	4.2399	519790000	12	26.1093	25.8151	25.6855	26.729	26.5576	26.6297
+	1.53378	0.526756	Q9D338	Q9D338	39S ribosomal protein L19, mitochondrial	Mrpl19	Color2 [DarkGray]	1	4	cell part;cytoplasmic part;intracellular membrane-bounded organelle;intracellular non-membrane-bounded organelle;intracellular organelle;intracellular organelle part;intracellular part;macromolecular complex;membrane;membrane-bounded organelle;mitochondrial part;mitochondrial ribosome;mitochondrion;non-membrane-bounded organelle;nuclear membrane;nuclear part;nucleus;organellar ribosome;organelle;…	5	5	5	20.2	20.2	20.2	33.578	0	13.674	255010000	16	25.3267	25.8268	25.5037	25.0461	25.1188	24.912
+	3.63864	-1.47859	Q9D379	Q9D379	Epoxide hydrolase 1	Ephx1	Color2 [DarkGray]	1	4	cell part;cytoplasmic part;endoplasmic reticulum membrane;endoplasmic reticulum part;integral to membrane;intracellular organelle part;intracellular part;intrinsic to membrane;membrane;membrane part;organelle membrane;organelle part	18	18	18	49.5	49.5	49.5	52.576	0	87.853	1432500000	70	26.9736	26.5812	26.867	28.2765	28.305	28.276
+	1.40893	-0.567473	Q9D3D9	Q9D3D9	ATP synthase subunit delta, mitochondrial	Atp5d	Color2 [DarkGray]	1	4	cell part;cytoplasmic part;envelope;intracellular membrane-bounded organelle;intracellular organelle;intracellular organelle part;intracellular part;macromolecular complex;membrane;membrane part;membrane-bounded organelle;mitochondrial envelope;mitochondrial inner membrane;mitochondrial membrane;mitochondrial membrane part;mitochondrial part;mitochondrial proton-transporting ATP synthase complex;…	4	4	4	43.5	43.5	43.5	17.6	0	54.396	14096000000	21	30.8725	31.013	30.4112	31.4015	31.2441	31.3536
+	1.37835	0.597003	Q9D404	Q9D404	3-oxoacyl-[acyl-carrier-protein] synthase, mitochondrial	Oxsm	Color2 [DarkGray]	1	4	cell part;cytoplasm;cytoplasmic part;intracellular membrane-bounded organelle;intracellular organelle;intracellular part;membrane-bounded organelle;mitochondrion;organelle	4	4	4	15	15	15	48.627	0	15.547	137910000	15	24.4471	24.9048	24.8784	23.8977	24.1697	24.3718
+	1.79043	0.59292	Q9D6J6	Q9D6J6	NADH dehydrogenase [ubiquinone] flavoprotein 2, mitochondrial	Ndufv2	Color2 [DarkGray]	1	4	cell part;cytoplasmic part;intracellular membrane-bounded organelle;intracellular organelle;intracellular organelle part;intracellular part;macromolecular complex;membrane part;membrane-bounded organelle;mitochondrial membrane part;mitochondrial part;mitochondrial respiratory chain complex I;mitochondrion;myelin sheath;NADH dehydrogenase complex;organelle;organelle part;protein complex;respirator…	15	15	15	64.1	64.1	64.1	27.285	0	237.11	13166000000	320	31.2154	31.3008	31.3398	30.5324	30.5654	30.9794
+	1.21148	1.72172	Q9D6M3;Q9DB41	Q9D6M3	Mitochondrial glutamate carrier 1	Slc25a22	Color2 [DarkGray]	1	4	cell part;cytoplasmic part;integral to membrane;intracellular membrane-bounded organelle;intracellular organelle;intracellular organelle part;intracellular part;intrinsic to membrane;membrane;membrane part;membrane-bounded organelle;mitochondrial inner membrane;mitochondrial membrane;mitochondrial part;mitochondrion;nuclear part;nucleoplasm;organelle;organelle inner membrane;organelle membrane;or…	6	6	6	27.6	27.6	27.6	34.67	0	25.634	290700000	21	26.2654	26.1009	26.2304	23.1461	25.1827	25.1028
+	2.74148	0.640504	Q9D6R2	Q9D6R2	Isocitrate dehydrogenase [NAD] subunit alpha, mitochondrial	Idh3a	Color2 [DarkGray]	1	4	cell part;cytoplasmic part;intracellular membrane-bounded organelle;intracellular organelle;intracellular part;membrane-bounded organelle;mitochondrion;myelin sheath;nucleus;organelle	24	24	24	52.2	52.2	52.2	39.638	0	323.31	53070000000	460	33.2792	33.2238	33.3165	32.4771	32.6615	32.7593
+	1.8711	0.605447	Q9D6S7	Q9D6S7	Ribosome-recycling factor, mitochondrial	Mrrf	Color2 [DarkGray]	1	4	cell part;cytoplasmic part;intracellular membrane-bounded organelle;intracellular organelle;intracellular part;membrane-bounded organelle;mitochondrion;organelle	5	5	5	31.3	31.3	31.3	29.05	0	39.843	526910000	22	26.5369	26.7259	26.7445	25.8113	26.2171	26.1625
+	1.92683	-0.462675	Q9D6U8	Q9D6U8	Protein FAM162A	Fam162a	Color2 [DarkGray]	1	4	cell part;cytoplasm;cytoplasmic part;extracellular membrane-bounded organelle;extracellular organelle;extracellular region part;extracellular vesicular exosome;integral to membrane;intracellular membrane-bounded organelle;intracellular organelle;intracellular part;intrinsic to membrane;membrane part;membrane-bounded organelle;membrane-bounded vesicle;mitochondrion;nucleus;organelle;vesicle	8	8	8	38.7	38.7	38.7	17.725	0	34.705	3713000000	68	28.8733	29.0646	28.8484	29.5333	29.2548	29.3863
+	2.00588	-0.896088	Q9D6Z1	Q9D6Z1	Nucleolar protein 56	Nop56	Color2 [DarkGray]	1	4	box C/D snoRNP complex;cell part;cytoplasm;intracellular non-membrane-bounded organelle;intracellular organelle;intracellular organelle part;intracellular part;macromolecular complex;membrane;non-membrane-bounded organelle;nuclear part;nucleolar part;nucleolus;nucleoplasm;organelle;organelle part;preribosome;pre-snoRNP complex;ribonucleoprotein complex;small nucleolar ribonucleoprotein complex;sm…	8	8	8	16.7	16.7	16.7	64.464	0	18.799	370410000	22	25.2096	25.0754	25.6519	26.3778	26.1392	26.1083
+	0.980251	-1.12835	Q9D7A6	Q9D7A6	Signal recognition particle 19 kDa protein	Srp19	Color2 [DarkGray]	1	4	cell part;cytoplasm;cytoplasmic part;intracellular membrane-bounded organelle;intracellular non-membrane-bounded organelle;intracellular organelle;intracellular organelle part;intracellular part;macromolecular complex;membrane-bounded organelle;mitochondrion;non-membrane-bounded organelle;nuclear part;nucleolus;nucleoplasm;nucleus;organelle;organelle part;ribonucleoprotein complex;signal recognit…	2	2	2	27.1	27.1	27.1	16.191	0	3.5333	55164000	4	21.7855	23.5418	22.3396	23.9302	23.4143	23.7075
+	2.90766	0.533087	Q9D7B6	Q9D7B6	Isobutyryl-CoA dehydrogenase, mitochondrial	Acad8	Color2 [DarkGray]	1	4	cell part;cytoplasmic part;intracellular membrane-bounded organelle;intracellular organelle;intracellular part;membrane-bounded organelle;mitochondrion;organelle	14	14	14	48.9	48.9	48.9	45.019	0	97.003	1592200000	78	28.1728	28.2978	28.221	27.5928	27.7757	27.7238
+	1.7239	0.766753	Q9D7H3	Q9D7H3	RNA 3-terminal phosphate cyclase	RtcA	Color2 [DarkGray]	1	4	cell part;intracellular membrane-bounded organelle;intracellular organelle;intracellular organelle part;intracellular part;membrane-bounded organelle;nuclear part;nucleoplasm;nucleus;organelle;organelle part	2	2	2	7.1	7.1	7.1	39.254	0	3.6002	43748000	7	23.214	23.0754	23.5445	22.6161	22.2244	22.6931
+	3.52539	1.32127	Q9D7J9	Q9D7J9	Enoyl-CoA hydratase domain-containing protein 3, mitochondrial	Echdc3	Color2 [DarkGray]	1	4	cell part;cytoplasmic part;intracellular membrane-bounded organelle;intracellular organelle;intracellular part;membrane-bounded organelle;mitochondrion;organelle	5	5	5	25.3	25.3	25.3	32.402	0	17.306	232660000	20	25.8998	25.6059	25.8131	24.4924	24.5486	24.314
+	1.07445	1.14898	Q9D8H7	Q9D8H7	Metalloendopeptidase OMA1, mitochondrial	Oma1	Color2 [DarkGray]	1	4	cell part;cytoplasmic part;integral to membrane;intracellular membrane-bounded organelle;intracellular organelle;intracellular organelle part;intracellular part;intrinsic to membrane;membrane;membrane part;membrane-bounded organelle;mitochondrial inner membrane;mitochondrial membrane;mitochondrial part;mitochondrion;organelle;organelle inner membrane;organelle membrane;organelle part	3	3	3	7.5	7.5	7.5	58.877	0	11.48	66173000	7	23.7231	24.5313	24.3026	22.1654	23.595	23.3496
+	3.20258	-1.30766	Q9D8N0	Q9D8N0	Elongation factor 1-gamma	Eef1g	Color2 [DarkGray]	1	4	cell part;cytoplasm;extracellular membrane-bounded organelle;extracellular organelle;extracellular region part;extracellular vesicular exosome;intracellular membrane-bounded organelle;intracellular organelle;intracellular part;membrane;membrane-bounded organelle;membrane-bounded vesicle;nucleus;organelle;vesicle	24	24	24	51	51	51	50.06	0	232.62	10630000000	248	29.9588	29.6516	29.8823	31.2646	31.2053	30.9459
+	1.58296	0.693274	Q9D8P4	Q9D8P4	39S ribosomal protein L17, mitochondrial	Mrpl17	Color2 [DarkGray]	1	4	cell part;cytoplasmic part;intracellular membrane-bounded organelle;intracellular organelle;intracellular organelle part;intracellular part;large ribosomal subunit;macromolecular complex;membrane;membrane-bounded organelle;mitochondrial inner membrane;mitochondrial large ribosomal subunit;mitochondrial membrane;mitochondrial part;mitochondrion;organellar large ribosomal subunit;organelle;organell…	2	2	2	9.7	9.7	9.7	20.249	0	4.1175	118850000	12	24.6603	24.3714	24.5906	23.8946	24.1353	23.5126
+	1.80401	-0.463591	Q9D8W5	Q9D8W5	26S proteasome non-ATPase regulatory subunit 12	Psmd12	Color2 [DarkGray]	1	4	cell part;extracellular membrane-bounded organelle;extracellular organelle;extracellular region part;extracellular vesicular exosome;intracellular part;macromolecular complex;membrane;membrane-bounded organelle;membrane-bounded vesicle;organelle;proteasome accessory complex;proteasome complex;proteasome regulatory particle;protein complex;vesicle	17	17	17	43.2	43.2	43.2	52.895	0	56.052	1337300000	46	27.339	27.4421	27.4991	27.9819	28.0082	27.6809
+	2.34322	-2.20953	Q9D8Y0;Q9D4J1	Q9D8Y0	EF-hand domain-containing protein D2	Efhd2	Color2 [DarkGray]	1	4	cell part;cytoplasmic part;extracellular membrane-bounded organelle;extracellular organelle;extracellular region part;extracellular vesicular exosome;intracellular membrane-bounded organelle;intracellular organelle;intracellular organelle part;intracellular part;membrane;membrane part;membrane raft;membrane-bounded organelle;membrane-bounded vesicle;mitochondrial inner membrane;mitochondrial memb…	9	9	9	35.4	35.4	35.4	26.791	0	26.843	514500000	24	24.7612	24.3083	25.0123	27.2791	27.1739	26.2575
+	1.5612	0.551487	Q9D8Y1	Q9D8Y1	Transmembrane protein 126A	Tmem126a	Color2 [DarkGray]	1	4	cell part;cytoplasmic part;integral to membrane;intracellular membrane-bounded organelle;intracellular organelle;intracellular organelle part;intracellular part;intrinsic to membrane;membrane;membrane part;membrane-bounded organelle;mitochondrial inner membrane;mitochondrial membrane;mitochondrial part;mitochondrion;organelle;organelle inner membrane;organelle membrane;organelle part	4	4	4	20.9	20.9	20.9	21.539	0	12.767	374540000	19	25.9409	26.1151	26.3832	25.4976	25.7936	25.4934
+	3.28583	-2.71271	Q9DAW9	Q9DAW9	Calponin-3	Cnn3	Color2 [DarkGray]	1	4	actin cytoskeleton;adherens junction;anchoring junction;cell junction;cell part;cell-substrate adherens junction;cell-substrate junction;cytoplasm;cytoskeleton;focal adhesion;intracellular non-membrane-bounded organelle;intracellular organelle;intracellular part;non-membrane-bounded organelle;organelle	6	6	5	23.3	23.3	20	36.428	0	12.702	197860000	8	22.8133	22.8472	22.0727	25.1513	25.4344	25.2856
+	2.173	0.58934	Q9DB20	Q9DB20	ATP synthase subunit O, mitochondrial	Atp5o	Color2 [DarkGray]	1	4	cell part;cytoplasmic part;extracellular membrane-bounded organelle;extracellular organelle;extracellular region part;extracellular vesicular exosome;intracellular membrane-bounded organelle;intracellular organelle;intracellular organelle part;intracellular part;macromolecular complex;membrane;membrane part;membrane-bounded organelle;membrane-bounded vesicle;mitochondrial membrane part;mitochondr…	14	14	14	70	70	70	23.363	0	201.1	74996000000	307	33.5828	33.8994	33.8917	33.1391	33.1733	33.2935
+	2.14784	-0.698804	Q9DB60	Q9DB60	Prostamide/prostaglandin F synthase	Fam213b	Color2 [DarkGray]	1	4	cell part;cytoplasm;cytoplasmic part;cytosol;endoplasmic reticulum;extracellular membrane-bounded organelle;extracellular organelle;extracellular region part;extracellular vesicular exosome;intracellular membrane-bounded organelle;intracellular organelle;intracellular part;membrane-bounded organelle;membrane-bounded vesicle;myelin sheath;organelle;vesicle	8	8	8	48.8	48.8	48.8	21.67	0	30.563	858890000	47	26.7216	26.685	26.5766	27.4353	27.1054	27.5388
+	0.910769	2.58657	Q9DB73	Q9DB73	NADH-cytochrome b5 reductase 1	Cyb5r1	Color2 [DarkGray]	1	4	cell part;cytoplasmic part;extracellular membrane-bounded organelle;extracellular organelle;extracellular region part;extracellular vesicular exosome;integral to membrane;intracellular membrane-bounded organelle;intracellular organelle;intracellular part;intrinsic to membrane;membrane;membrane part;membrane-bounded organelle;membrane-bounded vesicle;mitochondrion;organelle;vesicle	6	6	6	31.5	31.5	31.5	34.134	0	25.001	502630000	8	26.4424	26.7303	26.6125	23.5051	22.0103	26.51
+	3.24795	-1.03427	Q9DBC7;P12849	Q9DBC7	cAMP-dependent protein kinase type I-alpha regulatory subunit;cAMP-dependent protein kinase type I-alpha regulatory subunit, N-terminally processed	Prkar1a	Color2 [DarkGray]	1	4	AMP-activated protein kinase complex;cAMP-dependent protein kinase complex;cell part;cytoplasm;intracellular part;macromolecular complex;membrane;neuromuscular junction;plasma membrane;protein complex;synapse	20	20	20	55.9	55.9	55.9	43.185	0	150.92	3986700000	102	28.6266	28.6374	28.6108	29.7818	29.7418	29.4539
+	1.54273	-0.584412	Q9DBG3	Q9DBG3	AP-2 complex subunit beta	Ap2b1	Color2 [DarkGray]	1	4	AP-type membrane coat adaptor complex;cell part;clathrin adaptor complex;coated pit;cytoplasmic part;intracellular membrane-bounded organelle;intracellular organelle;intracellular part;macromolecular complex;membrane;membrane part;membrane-bounded organelle;organelle;plasma membrane;protein complex	20	9	9	25.8	13	13	104.58	0	19.978	416090000	16	25.9198	25.4351	25.6348	26.4493	26.1873	26.1062
+	2.38618	1.04357	Q9DBG5	Q9DBG5	Perilipin-3	Plin3	Color2 [DarkGray]	1	4	cell part;cytoplasm;cytoplasmic part;endosomal part;endosome membrane;intracellular membrane-bounded organelle;intracellular organelle;intracellular organelle part;intracellular part;lipid particle;membrane;membrane-bounded organelle;organelle;organelle membrane;organelle part	13	13	13	52.2	52.2	52.2	47.262	0	101.12	869890000	48	27.4772	27.7009	27.6642	26.3209	26.8756	26.5151
+	2.92456	-1.97303	Q9DBG7	Q9DBG7	Signal recognition particle receptor subunit alpha	Srpr	Color2 [DarkGray]	1	4	cell part;cytoplasmic part;endoplasmic reticulum part;extracellular membrane-bounded organelle;extracellular organelle;extracellular region part;extracellular vesicular exosome;intracellular organelle part;intracellular part;macromolecular complex;membrane;membrane part;membrane-bounded organelle;membrane-bounded vesicle;organelle;organelle part;protein complex;receptor complex;signal recognition…	5	5	5	9	9	9	69.622	0	8.6894	58494000	5	22.0898	22.2217	21.6827	23.9314	24.295	23.687
+	2.73512	-2.90559	Q9DBR7	Q9DBR7	Protein phosphatase 1 regulatory subunit 12A	Ppp1r12a	Color2 [DarkGray]	1	4	actin cytoskeleton;adherens junction;anchoring junction;cell junction;cell part;cell-substrate adherens junction;cell-substrate junction;centrosome;chromosomal part;contractile fiber;cytoplasm;cytoplasmic part;cytoskeletal part;cytoskeleton;focal adhesion;intracellular non-membrane-bounded organelle;intracellular organelle;intracellular organelle part;intracellular part;kinetochore;macromolecular…	12	11	11	18	16.4	16.4	114.99	0	46.51	365560000	28	23.5226	23.5401	23.6232	26.9565	26.7605	25.6858
+	1.40573	-0.807195	Q9DBS1	Q9DBS1	Transmembrane protein 43	Tmem43	Color2 [DarkGray]	1	4	cell part;cytoplasmic part;endoplasmic reticulum lumen;endoplasmic reticulum part;Golgi apparatus;integral to membrane;integral to nuclear inner membrane;integral to organelle membrane;intracellular membrane-bounded organelle;intracellular organelle;intracellular organelle lumen;intracellular organelle part;intracellular part;intrinsic to membrane;intrinsic to nuclear inner membrane;intrinsic to …	5	5	5	15.8	15.8	15.8	44.783	0	16.285	332640000	24	25.1508	24.7522	25.6651	26.0807	25.9561	25.9527
+	2.80332	-1.08589	Q9DC16	Q9DC16	Endoplasmic reticulum-Golgi intermediate compartment protein 1	Ergic1	Color2 [DarkGray]	1	4	cell part;cytoplasmic part;endoplasmic reticulum membrane;endoplasmic reticulum part;endoplasmic reticulum-Golgi intermediate compartment;endoplasmic reticulum-Golgi intermediate compartment membrane;Golgi apparatus part;Golgi membrane;integral to membrane;intracellular membrane-bounded organelle;intracellular organelle;intracellular organelle part;intracellular part;intrinsic to membrane;membran…	4	4	4	19	19	19	32.562	0	20.944	130710000	9	23.7533	23.7193	23.407	24.8071	24.5333	24.797
+	2.25795	0.534126	Q9DC61	Q9DC61	Mitochondrial-processing peptidase subunit alpha	Pmpca	Color2 [DarkGray]	1	4	cell part;cytoplasmic part;extracellular region part;extracellular space;intracellular membrane-bounded organelle;intracellular organelle;intracellular organelle lumen;intracellular organelle part;intracellular part;membrane-bounded organelle;membrane-enclosed lumen;mitochondrial matrix;mitochondrial part;mitochondrion;organelle;organelle lumen;organelle part	14	14	14	30.9	30.9	30.9	58.278	0	56.772	1034900000	51	27.6505	27.4254	27.7571	27.0618	27.0808	27.0881
+	1.53518	0.698272	Q9DCB8	Q9DCB8	Iron-sulfur cluster assembly 2 homolog, mitochondrial	Isca2	Color2 [DarkGray]	1	4	cell part;cytoplasmic part;intracellular membrane-bounded organelle;intracellular organelle;intracellular part;membrane-bounded organelle;mitochondrion;organelle	4	4	4	31.2	31.2	31.2	16.718	0	12.008	322690000	19	25.9681	25.7407	25.6624	24.74	25.3859	25.1505
+	1.49825	0.646304	Q9DCM0	Q9DCM0	Persulfide dioxygenase ETHE1, mitochondrial	Ethe1	Color2 [DarkGray]	1	4	cell part;cytoplasm;cytoplasmic part;intracellular membrane-bounded organelle;intracellular organelle;intracellular organelle lumen;intracellular organelle part;intracellular part;membrane-bounded organelle;membrane-enclosed lumen;mitochondrial matrix;mitochondrial part;mitochondrion;nuclear part;nucleoplasm;organelle;organelle lumen;organelle part	6	6	6	36.6	36.6	36.6	27.738	0	22.279	363610000	20	26.0618	26.2873	26.0926	25.1301	25.648	25.7247
+	2.36996	1.87983	Q9DCM2	Q9DCM2	Glutathione S-transferase kappa 1	Gstk1	Color2 [DarkGray]	1	4	cell part;cytoplasmic part;extracellular membrane-bounded organelle;extracellular organelle;extracellular region part;extracellular vesicular exosome;intracellular;intracellular membrane-bounded organelle;intracellular organelle;intracellular organelle lumen;intracellular organelle part;intracellular part;membrane;membrane-bounded organelle;membrane-bounded vesicle;membrane-enclosed lumen;microbo…	12	12	12	58.4	58.4	58.4	25.704	0	61.901	1172500000	47	28.0075	28.3056	28.439	25.7855	26.5985	26.7287
+	1.3401	-0.563203	Q9DCN2	Q9DCN2	NADH-cytochrome b5 reductase 3;NADH-cytochrome b5 reductase 3 membrane-bound form;NADH-cytochrome b5 reductase 3 soluble form	Cyb5r3	Color2 [DarkGray]	1	4	cell part;cytoplasmic part;cytosol;endoplasmic reticulum membrane;endoplasmic reticulum part;extracellular membrane-bounded organelle;extracellular organelle;extracellular region part;extracellular vesicular exosome;intracellular organelle part;intracellular part;lipid particle;membrane;membrane part;membrane-bounded organelle;membrane-bounded vesicle;mitochondrial inner membrane;mitochondrial me…	15	15	15	53.8	53.8	53.8	34.127	0	158.51	3087800000	80	28.5354	28.457	28.7409	29.3535	29.2807	28.7886
+	1.78048	0.544887	Q9DCS9	Q9DCS9	NADH dehydrogenase [ubiquinone] 1 beta subcomplex subunit 10	Ndufb10	Color2 [DarkGray]	1	4	cell part;cytoplasmic part;extracellular membrane-bounded organelle;extracellular organelle;extracellular region part;extracellular vesicular exosome;intracellular membrane-bounded organelle;intracellular organelle;intracellular organelle part;intracellular part;macromolecular complex;membrane;membrane part;membrane-bounded organelle;membrane-bounded vesicle;mitochondrial inner membrane;mitochond…	10	10	10	59.7	59.7	59.7	21.024	0	258.27	13536000000	160	31.2735	31.3186	31.3476	30.6621	30.6053	31.0377
+	2.63732	0.696095	Q9DCT2	Q9DCT2	NADH dehydrogenase [ubiquinone] iron-sulfur protein 3, mitochondrial	Ndufs3	Color2 [DarkGray]	1	4	cell part;cytoplasmic part;intracellular membrane-bounded organelle;intracellular organelle;intracellular organelle part;intracellular part;macromolecular complex;membrane;membrane part;membrane-bounded organelle;mitochondrial inner membrane;mitochondrial membrane;mitochondrial membrane part;mitochondrial part;mitochondrial respiratory chain complex I;mitochondrion;myelin sheath;NADH dehydrogenas…	17	17	17	54.4	54.4	54.4	30.149	0	189.99	21972000000	220	32.0966	32.0741	32.0717	31.3634	31.2223	31.5684
+	1.85272	0.651371	Q9DCT8	Q9DCT8	Cysteine-rich protein 2	Crip2	Color2 [DarkGray]	1	4	cell cortex;cell part;cytoplasmic part;extracellular matrix;extracellular region part;intracellular part	9	9	9	67.8	67.8	67.8	22.727	0	233.23	11817000000	161	31.0176	31.2036	31.2754	30.7375	30.268	30.5369
+	4.77073	0.849541	Q9DCV4	Q9DCV4	Regulator of microtubule dynamics protein 1	Rmdn1	Color2 [DarkGray]	1	4	cell part;centrosome;cytoplasmic part;cytoskeletal part;intracellular membrane-bounded organelle;intracellular non-membrane-bounded organelle;intracellular organelle;intracellular organelle part;intracellular part;macromolecular complex;membrane-bounded organelle;microtubule;microtubule organizing center;mitochondrion;non-membrane-bounded organelle;organelle;organelle part;protein complex;spindle…	9	9	9	33.8	33.8	33.8	35	0	54.614	1697200000	67	28.4696	28.4087	28.4313	27.5383	27.6419	27.5807
+	3.22509	0.899317	Q9DCW4	Q9DCW4	Electron transfer flavoprotein subunit beta	Etfb	Color2 [DarkGray]	1	4	cell part;cytoplasmic part;electron transfer flavoprotein complex;extracellular membrane-bounded organelle;extracellular organelle;extracellular region part;extracellular vesicular exosome;intracellular membrane-bounded organelle;intracellular organelle;intracellular organelle part;intracellular part;macromolecular complex;membrane-bounded organelle;membrane-bounded vesicle;mitochondrial electron…	18	18	18	73.3	73.3	73.3	27.623	0	323.31	32258000000	395	32.7342	32.6933	32.696	31.632	31.8637	31.93
+	2.09836	0.408733	Q9DCZ4	Q9DCZ4	Apolipoprotein O	Apoo	Color2 [DarkGray]	1	4	cell part;integral to membrane;intrinsic to membrane;membrane part	6	6	6	44.4	44.4	44.4	22.604	0	64.179	3797600000	58	29.2762	29.4957	29.5072	28.9765	28.9877	29.0887
+	1.92268	-0.50618	Q9EP69	Q9EP69	Phosphatidylinositide phosphatase SAC1	Sacm1l	Color2 [DarkGray]	1	4	alpha-amino-3-hydroxy-5-methyl-4-isoxazolepropionic acid selective glutamate receptor complex;cell part;cytoplasmic part;endoplasmic reticulum membrane;endoplasmic reticulum part;Golgi apparatus;integral to endoplasmic reticulum membrane;integral to membrane;integral to organelle membrane;intracellular membrane-bounded organelle;intracellular organelle;intracellular organelle part;intracellular p…	19	19	19	38.3	38.3	38.3	66.943	0	44.928	1123700000	70	27.3135	27.1541	27.033	27.8339	27.6242	27.5609
+	2.97424	0.648949	Q9EP89	Q9EP89	Serine beta-lactamase-like protein LACTB, mitochondrial	Lactb	Color2 [DarkGray]	1	4	cell part;cytoplasm;cytoplasmic part;intracellular membrane-bounded organelle;intracellular organelle;intracellular part;membrane-bounded organelle;mitochondrion;organelle	6	6	6	15.1	15.1	15.1	60.705	0	29.618	350730000	28	26.059	26.066	26.2295	25.3844	25.4581	25.5652
+	1.3696	-0.583176	Q9EPL8	Q9EPL8	Importin-7	Ipo7	Color2 [DarkGray]	1	4	cell part;cytoplasm;intracellular organelle part;intracellular part;membrane;nuclear part;nucleoplasm;organelle part	13	13	13	19	19	19	119.49	0	72.028	659080000	41	26.2646	26.1356	26.5871	26.7308	26.8034	27.2027
+	3.26644	1.34226	Q9EQ20	Q9EQ20	Methylmalonate-semialdehyde dehydrogenase [acylating], mitochondrial	Aldh6a1	Color2 [DarkGray]	1	4	cell part;cytoplasmic part;extracellular membrane-bounded organelle;extracellular organelle;extracellular region part;extracellular vesicular exosome;intracellular membrane-bounded organelle;intracellular organelle;intracellular organelle part;intracellular part;membrane-bounded organelle;membrane-bounded vesicle;mitochondrion;nuclear part;nucleoplasm;organelle;organelle part;vesicle	24	24	24	59.3	59.3	59.3	57.915	0	276.14	6870000000	187	30.6379	30.5358	30.7873	29.0893	29.4271	29.4177
+	2.4426	-1.09639	Q9EQK5	Q9EQK5	Major vault protein	Mvp	Color2 [DarkGray]	1	4	cell part;cytoplasm;cytoplasmic part;cytoskeleton;extracellular membrane-bounded organelle;extracellular organelle;extracellular region part;extracellular vesicular exosome;intracellular membrane-bounded organelle;intracellular non-membrane-bounded organelle;intracellular organelle;intracellular part;macromolecular complex;membrane;membrane-bounded organelle;membrane-bounded vesicle;non-membrane-…	25	25	25	39.1	39.1	39.1	95.923	0	89.284	1594700000	79	27.2664	27.0419	27.395	28.6017	28.2918	28.099
+	2.30332	-1.10229	Q9EQU5	Q9EQU5	Protein SET	Set	Color2 [DarkGray]	1	4	cell part;cytoplasm;cytoplasmic part;cytosol;endoplasmic reticulum;intracellular membrane-bounded organelle;intracellular organelle;intracellular organelle part;intracellular part;macromolecular complex;membrane-bounded organelle;nuclear part;nucleoplasm;nucleus;organelle;organelle part;perinuclear region of cytoplasm;protein complex	4	4	4	18.3	18.3	18.3	33.377	0	23.192	568260000	22	25.9713	25.4546	25.7579	26.8122	27.0591	26.6193
+	2.61787	0.503738	Q9ER88	Q9ER88	28S ribosomal protein S29, mitochondrial	Dap3	Color2 [DarkGray]	1	4	cell part;cytoplasmic part;intracellular membrane-bounded organelle;intracellular non-membrane-bounded organelle;intracellular organelle;intracellular organelle lumen;intracellular organelle part;intracellular part;macromolecular complex;membrane-bounded organelle;membrane-enclosed lumen;mitochondrial matrix;mitochondrial part;mitochondrial ribosome;mitochondrion;non-membrane-bounded organelle;nu…	6	6	6	17.9	17.9	17.9	44.699	0	14.299	328950000	31	25.9103	25.8929	26.0207	25.3182	25.5265	25.4681
+	2.2764	-0.55981	Q9ERP3;Q38HM4	Q9ERP3	Tripartite motif-containing protein 54	Trim54	Color2 [DarkGray]	1	4	cell part;contractile fiber;contractile fiber part;cytoplasm;cytoplasmic part;cytoskeletal part;intracellular membrane-bounded organelle;intracellular non-membrane-bounded organelle;intracellular organelle;intracellular organelle part;intracellular part;M band;macromolecular complex;membrane-bounded organelle;microtubule;microtubule associated complex;non-membrane-bounded organelle;nucleus;organe…	12	12	12	50.8	50.8	50.8	41.13	0	72.217	1142200000	40	27.0634	27.0914	27.3377	27.7936	27.6216	27.7567
+	2.83409	0.763355	Q9ERS2	Q9ERS2	NADH dehydrogenase [ubiquinone] 1 alpha subcomplex subunit 13	Ndufa13	Color2 [DarkGray]	1	4	cell part;cytoplasm;cytoplasmic part;extracellular membrane-bounded organelle;extracellular organelle;extracellular region part;extracellular vesicular exosome;integral to membrane;intracellular membrane-bounded organelle;intracellular organelle;intracellular organelle part;intracellular part;intrinsic to membrane;macromolecular complex;membrane part;membrane-bounded organelle;membrane-bounded ve…	13	13	13	68.1	68.1	68.1	16.859	0	66.193	14727000000	153	31.501	31.4838	31.4167	30.6374	30.5837	30.8904
+	1.83899	-0.528568	Q9ES97	Q9ES97	Reticulon-3	Rtn3	Color2 [DarkGray]	1	4	cell part;cytoplasmic part;endomembrane system;endoplasmic reticulum;endoplasmic reticulum membrane;endoplasmic reticulum part;extracellular membrane-bounded organelle;extracellular organelle;extracellular region part;extracellular vesicular exosome;Golgi apparatus part;Golgi membrane;integral to membrane;intracellular membrane-bounded organelle;intracellular organelle;intracellular organelle par…	1	1	1	1.1	1.1	1.1	103.88	0	5.1449	717720000	15	26.4721	26.5381	26.4746	27.2257	26.7918	27.053
+	2.08719	-1.74293	Q9ET30	Q9ET30	Transmembrane 9 superfamily member 3	Tm9sf3	Color2 [DarkGray]	1	4	cell part;integral to membrane;intrinsic to membrane;membrane part	4	4	4	9.7	9.7	9.7	67.544	0	6.1748	141450000	4	22.3381	22.9504	23.5512	24.6216	24.8324	24.6146
+	2.73931	0.6744	Q9JHI5	Q9JHI5	Isovaleryl-CoA dehydrogenase, mitochondrial	Ivd	Color2 [DarkGray]	1	4	cell part;cytoplasmic part;intracellular membrane-bounded organelle;intracellular organelle;intracellular organelle lumen;intracellular organelle part;intracellular part;membrane;membrane-bounded organelle;membrane-enclosed lumen;mitochondrial matrix;mitochondrial membrane;mitochondrial part;mitochondrion;nuclear part;nucleoplasm;organelle;organelle lumen;organelle membrane;organelle part	18	18	18	44.3	44.3	44.3	46.325	0	103.51	5308700000	89	30.0392	30.1415	29.9499	29.2234	29.4528	29.4312
+	2.9222	-0.456394	Q9JHU4	Q9JHU4	Cytoplasmic dynein 1 heavy chain 1	Dync1h1	Color2 [DarkGray]	1	4	cell part;cell projection;centrosome;cytoplasm;cytoplasmic dynein complex;cytoplasmic part;cytoskeletal part;dynein complex;extracellular membrane-bounded organelle;extracellular organelle;extracellular region part;extracellular vesicular exosome;filopodium;intracellular non-membrane-bounded organelle;intracellular organelle;intracellular organelle part;intracellular part;macromolecular complex;m…	156	156	156	40.2	40.2	40.2	532.04	0	323.31	13689000000	754	30.7624	30.7663	30.8548	31.2811	31.3122	31.1594
+	1.96776	0.536629	Q9JHW2	Q9JHW2	Omega-amidase NIT2	Nit2	Color2 [DarkGray]	1	4	cell part;centrosome;cytoplasm;cytoplasmic part;cytoskeletal part;extracellular membrane-bounded organelle;extracellular organelle;extracellular region part;extracellular vesicular exosome;intracellular membrane-bounded organelle;intracellular non-membrane-bounded organelle;intracellular organelle;intracellular organelle part;intracellular part;membrane-bounded organelle;membrane-bounded vesicle;…	10	10	10	49.3	49.3	49.3	30.501	0	47.145	695220000	39	27.0269	26.9586	27.1221	26.3075	26.5044	26.6858
+	3.69191	0.725002	Q9JI39	Q9JI39	ATP-binding cassette sub-family B member 10, mitochondrial	Abcb10	Color2 [DarkGray]	1	4	cell part;cytoplasmic part;integral to membrane;integral to mitochondrial membrane;integral to organelle membrane;intracellular membrane-bounded organelle;intracellular organelle;intracellular organelle part;intracellular part;intrinsic to membrane;intrinsic to organelle membrane;membrane;membrane part;membrane-bounded organelle;mitochondrial inner membrane;mitochondrial membrane;mitochondrial me…	11	11	11	16.4	16.4	16.4	77.187	0	26.316	337150000	38	26.0191	26.1257	26.097	25.3239	25.2969	25.446
+	2.58866	0.419393	Q9JI91	Q9JI91	Alpha-actinin-2	Actn2	Color2 [DarkGray]	1	4	adherens junction;anchoring junction;cell cortex part;cell junction;cell part;cell projection;cell-substrate adherens junction;cell-substrate junction;contractile fiber part;cortical actin cytoskeleton;cortical cytoskeleton;cytoplasmic part;cytoskeletal part;cytoskeleton;extracellular membrane-bounded organelle;extracellular organelle;extracellular region part;extracellular vesicular exosome;filo…	69	69	45	78.4	78.4	58.9	103.83	0	323.31	230020000000	1371	35.3075	35.2957	35.3568	35.02	34.8444	34.8375
+	1.42295	-0.577381	Q9JII6	Q9JII6	Alcohol dehydrogenase [NADP(+)]	Akr1a1	Color2 [DarkGray]	1	4	apical plasma membrane;cell part;cytoplasmic part;cytosol;extracellular membrane-bounded organelle;extracellular organelle;extracellular region part;extracellular space;extracellular vesicular exosome;intracellular part;membrane part;membrane-bounded organelle;membrane-bounded vesicle;organelle;plasma membrane part;vesicle	14	14	14	55.1	55.1	55.1	36.586	0	96.783	1290100000	65	27.2573	27.0708	27.5261	27.9988	27.9953	27.5923
+	2.58052	0.4443	Q9JIY5	Q9JIY5	Serine protease HTRA2, mitochondrial	Htra2	Color2 [DarkGray]	1	4	CD40 receptor complex;cell part;chromatin;chromosomal part;cytoplasmic part;cytoskeleton;cytosol;internal side of plasma membrane;intracellular membrane-bounded organelle;intracellular non-membrane-bounded organelle;intracellular organelle;intracellular organelle part;intracellular part;macromolecular complex;membrane;membrane part;membrane-bounded organelle;membrane-enclosed lumen;mitochondrial …	5	5	5	13.3	13.3	13.3	49.348	0	13.648	371950000	28	26.0876	26.1024	26.079	25.6055	25.7748	25.5558
+	1.75691	-0.447669	Q9JJ28	Q9JJ28	Protein flightless-1 homolog	Flii	Color2 [DarkGray]	1	4	adherens junction;anchoring junction;brush border;cell junction;cell part;cell projection;cell-substrate adherens junction;cell-substrate junction;cytoplasm;cytoplasmic part;cytoskeletal part;focal adhesion;intracellular organelle part;intracellular part;microtubule organizing center;nuclear part;nucleoplasm;organelle part	11	11	11	10.9	10.9	10.9	144.8	0	30.722	281610000	25	25.0573	25.1593	25.2648	25.6132	25.7749	25.4362
+	1.57442	-0.658073	Q9JJU8	Q9JJU8	SH3 domain-binding glutamic acid-rich-like protein	Sh3bgrl	Color2 [DarkGray]	1	4	extracellular membrane-bounded organelle;extracellular organelle;extracellular region part;extracellular space;extracellular vesicular exosome;membrane-bounded organelle;membrane-bounded vesicle;organelle;vesicle	4	4	4	46.5	46.5	46.5	12.811	0	20.842	303420000	17	25.4313	24.928	25.0553	25.8486	25.9706	25.5697
+	2.59403	0.836144	Q9JJW5	Q9JJW5	Myozenin-2	Myoz2	Color2 [DarkGray]	1	4	actin cytoskeleton;cell part;contractile fiber part;cytoplasmic part;cytoskeleton;intracellular non-membrane-bounded organelle;intracellular organelle;intracellular part;non-membrane-bounded organelle;organelle;organelle part;Z disc	18	18	18	77.3	77.3	77.3	29.761	0	323.31	15145000000	220	31.5222	31.5177	31.72	30.7473	30.5704	30.9339
+	1.71921	0.565482	Q9JJZ2	Q9JJZ2	Tubulin alpha-8 chain	Tuba8	Color2 [DarkGray]	1	4	cell part;cytoplasm;cytoskeletal part;intracellular organelle part;intracellular part;macromolecular complex;microtubule;organelle part;protein complex	22	7	7	55.7	22	22	50.051	0	50.634	1042200000	45	27.635	27.5658	27.6354	26.7558	27.1546	27.2293
+	2.70621	1.02208	Q9JK42	Q9JK42	[Pyruvate dehydrogenase (acetyl-transferring)] kinase isozyme 2, mitochondrial	Pdk2	Color2 [DarkGray]	1	4	cell part;cytoplasm;cytoplasmic part;intracellular membrane-bounded organelle;intracellular organelle;intracellular organelle part;intracellular part;macromolecular complex;membrane-bounded organelle;mitochondrial part;mitochondrial pyruvate dehydrogenase complex;mitochondrion;nuclear part;nucleoplasm;organelle;organelle part;protein complex;pyruvate dehydrogenase complex	14	13	13	45.5	43.2	43.2	46.04	0	125.33	2131600000	80	28.7811	28.8649	28.9349	27.5749	28.0191	27.9206
+	2.51731	0.606112	Q9JLT4	Q9JLT4	Thioredoxin reductase 2, mitochondrial	Txnrd2	Color2 [DarkGray]	1	4	cell part;cytoplasmic part;intracellular membrane-bounded organelle;intracellular organelle;intracellular part;membrane-bounded organelle;mitochondrion;organelle	11	11	10	33.2	33.2	30.3	56.602	0	74.389	1662000000	59	28.195	28.3807	28.2614	27.5208	27.7734	27.7246
+	1.54972	0.568703	Q9JLV5	Q9JLV5	Cullin-3	Cul3	Color2 [DarkGray]	1	4	cell part;Cul3-RING ubiquitin ligase complex;cullin-RING ubiquitin ligase complex;cytoplasm;cytoplasmic part;cytoskeletal part;extracellular membrane-bounded organelle;extracellular organelle;extracellular region part;extracellular vesicular exosome;Golgi apparatus;Golgi apparatus part;Golgi membrane;intracellular membrane-bounded organelle;intracellular organelle;intracellular organelle part;int…	7	7	7	11.3	11.3	11.3	88.947	0	13.093	130790000	19	24.8497	24.6219	24.307	23.9029	24.106	24.0636
+	3.22734	0.899709	Q9JLZ3	Q9JLZ3	Methylglutaconyl-CoA hydratase, mitochondrial	Auh	Color2 [DarkGray]	1	4	cell part;cytoplasmic part;intracellular membrane-bounded organelle;intracellular organelle;intracellular part;membrane-bounded organelle;mitochondrion;organelle	10	10	10	30.6	30.6	30.6	33.395	0	92.49	1435900000	73	28.319	28.1333	28.2708	27.2037	27.4484	27.3719
+	1.24108	1.18988	Q9JMD3	Q9JMD3	PCTP-like protein	Stard10	Color2 [DarkGray]	1	4	cell junction;cell part;cell projection;cell-cell junction;cilium;cytoplasmic part;cytosol;intercellular canaliculus;intracellular part;membrane;microvillus;motile cilium	2	2	2	9.6	9.6	9.6	32.951	0	3.7105	42756000	6	23.482	23.3338	23.6723	22.8665	21.4396	22.6123
+	2.3468	0.865117	Q9QUH0	Q9QUH0	Glutaredoxin-1	Glrx	Color2 [DarkGray]	1	4	cell part;cytoplasm;cytoplasmic part;extracellular membrane-bounded organelle;extracellular organelle;extracellular region part;extracellular vesicular exosome;intracellular membrane-bounded organelle;intracellular organelle;intracellular part;membrane-bounded organelle;membrane-bounded vesicle;mitochondrion;nucleus;organelle;vesicle	5	5	5	37.4	37.4	37.4	11.871	0	32.124	553860000	36	26.9266	26.9304	26.6847	25.7412	26.0373	26.1679
+	1.79377	-0.635363	Q9QUM9	Q9QUM9	Proteasome subunit alpha type-6	Psma6	Color2 [DarkGray]	1	4	cell part;contractile fiber;contractile fiber part;cytoplasm;cytoplasmic mRNA processing body;cytoplasmic part;cytosol;extracellular membrane-bounded organelle;extracellular organelle;extracellular region part;extracellular vesicular exosome;intracellular membrane-bounded organelle;intracellular non-membrane-bounded organelle;intracellular organelle;intracellular organelle part;intracellular part…	9	9	9	39.8	39.8	39.8	27.372	0	26.301	1204100000	33	27.2343	27.0665	27.1829	27.7508	28.0775	27.5615
+	1.67608	2.80265	Q9QX60	Q9QX60	Deoxyguanosine kinase, mitochondrial	Dguok	Color2 [DarkGray]	1	4	cell part;cytoplasm;cytoplasmic part;cytosol;intracellular membrane-bounded organelle;intracellular organelle;intracellular part;membrane-bounded organelle;mitochondrion;nucleus;organelle	3	3	3	21.3	21.3	21.3	32.281	0	30.664	172160000	6	25.7525	25.8309	25.985	22.388	24.5642	22.2082
+	1.55325	-1.3552	Q9QXD8	Q9QXD8	LIM domain-containing protein 1	Limd1	Color2 [DarkGray]	1	4	adherens junction;anchoring junction;cell junction;cell part;cell-substrate adherens junction;cell-substrate junction;cytoplasm;cytoplasmic mRNA processing body;cytoplasmic part;focal adhesion;intracellular membrane-bounded organelle;intracellular non-membrane-bounded organelle;intracellular organelle;intracellular part;macromolecular complex;membrane-bounded organelle;non-membrane-bounded organe…	4	4	4	12.4	12.4	12.4	71.421	0	4.2755	42708000	5	22.1468	21.7056	22.8705	23.1723	23.747	23.8692
+	1.22281	-1.34485	Q9QXS6	Q9QXS6	Drebrin	Dbn1	Color2 [DarkGray]	1	4	actin cytoskeleton;cell cortex;cell junction;cell part;cell-cell junction;cytoplasmic part;cytoskeleton;gap junction;intracellular non-membrane-bounded organelle;intracellular organelle;intracellular part;membrane;non-membrane-bounded organelle;organelle;plasma membrane	5	5	5	8.9	8.9	8.9	77.286	0	7.8386	69064000	5	22.0631	23.7923	23.0698	24.1206	24.29	24.5492
+	2.53296	1.02362	Q9QXX4	Q9QXX4	Calcium-binding mitochondrial carrier protein Aralar2	Slc25a13	Color2 [DarkGray]	1	4	cell part;cytoplasmic part;integral to membrane;intracellular membrane-bounded organelle;intracellular organelle;intracellular organelle part;intracellular part;intrinsic to membrane;membrane;membrane part;membrane-bounded organelle;mitochondrial inner membrane;mitochondrial membrane;mitochondrial part;mitochondrion;organelle;organelle inner membrane;organelle membrane;organelle part	32	28	28	53.8	48.4	48.4	74.466	0	285.76	12434000000	225	31.0951	31.2892	31.4097	30.138	30.0882	30.4971
+	2.14837	-0.536425	Q9QXZ0	Q9QXZ0	Microtubule-actin cross-linking factor 1	Macf1	Color2 [DarkGray]	1	4	actin cytoskeleton;cell cortex;cell part;cell projection membrane;cell projection part;cytoplasm;cytoplasmic part;cytoskeletal part;cytoskeleton;Golgi apparatus;intracellular membrane-bounded organelle;intracellular non-membrane-bounded organelle;intracellular organelle;intracellular organelle part;intracellular part;leading edge membrane;macromolecular complex;membrane;membrane part;membrane-bou…	22	22	21	4.2	4.2	4	831.87	0	43.636	287510000	24	25.1743	25.3261	25.0204	25.7361	25.7952	25.5988
+	1.28449	-0.84498	Q9QY36;Q3UX61	Q9QY36;Q3UX61	N-alpha-acetyltransferase 10;N-alpha-acetyltransferase 11	Naa10;Naa11	Color2 [DarkGray]	1	4	cell part;cytoplasm;cytoplasmic part;cytosolic part;cytosolic ribosome;intracellular;intracellular membrane-bounded organelle;intracellular non-membrane-bounded organelle;intracellular organelle;intracellular organelle part;intracellular part;macromolecular complex;membrane;membrane-bounded organelle;NatA complex;non-membrane-bounded organelle;N-terminal protein acetyltransferase complex;nuclear …	4	4	4	20.4	20.4	20.4	26.519	0	4.2701	123760000	7	23.265	23.6691	24.3021	24.5156	24.7172	24.5384
+	4.04654	1.37412	Q9QYG0	Q9QYG0	Protein NDRG2	Ndrg2	Color2 [DarkGray]	1	4	cell part;cell projection part;centrosome;cytoplasm;cytoplasmic part;cytoskeletal part;extracellular membrane-bounded organelle;extracellular organelle;extracellular region part;extracellular vesicular exosome;Golgi apparatus;growth cone;intracellular membrane-bounded organelle;intracellular non-membrane-bounded organelle;intracellular organelle;intracellular organelle part;intracellular part;mem…	15	15	15	67.7	67.7	67.7	40.789	0	323.31	15814000000	211	31.7147	31.8498	31.893	30.44	30.3313	30.5639
+	2.53619	0.507255	Q9QYR9;Q32Q92;Q6Q2Z6;Q8BWN8;Q9QYR7	Q9QYR9	Acyl-coenzyme A thioesterase 2, mitochondrial	Acot2	Color2 [DarkGray]	1	4	cell part;cytoplasmic part;cytosol;extracellular membrane-bounded organelle;extracellular organelle;extracellular region part;extracellular vesicular exosome;intracellular membrane-bounded organelle;intracellular organelle;intracellular organelle lumen;intracellular organelle part;intracellular part;membrane-bounded organelle;membrane-bounded vesicle;membrane-enclosed lumen;microbody;mitochondria…	20	20	10	52.3	52.3	30.7	49.656	0	323.31	17632000000	172	31.6037	31.6766	31.6793	31.042	31.1062	31.2896
+	1.89478	-2.08854	Q9QZ57	Q9QZ57	Heat shock protein beta-3	Hspb3	Color2 [DarkGray]	1	4	cell part;cytoplasm;intracellular membrane-bounded organelle;intracellular organelle;intracellular part;membrane-bounded organelle;nucleus;organelle	2	2	2	16.9	16.9	16.9	17.229	0	8.5845	88222000	9	22.0271	21.1714	22.8358	24.2474	23.9829	24.0696
+	2.55364	-0.872524	Q9QZD9	Q9QZD9	Eukaryotic translation initiation factor 3 subunit I	Eif3i	Color2 [DarkGray]	1	4	cell part;cytoplasmic part;eukaryotic 43S preinitiation complex;eukaryotic 48S preinitiation complex;eukaryotic translation initiation factor 3 complex;eukaryotic translation initiation factor 3 complex, eIF3m;extracellular membrane-bounded organelle;extracellular organelle;extracellular region part;extracellular vesicular exosome;intracellular part;macromolecular complex;membrane-bounded organel…	11	11	11	51.1	51.1	51.1	36.46	0	50.712	719950000	38	26.1934	26.2649	26.3466	27.2014	27.3214	26.8997
+	2.63866	-0.537297	Q9QZE5	Q9QZE5	Coatomer subunit gamma-1	Copg1	Color2 [DarkGray]	1	4	cell part;COPI vesicle coat;cytoplasmic part;cytoplasmic vesicle part;cytosol;Golgi apparatus part;intracellular organelle part;intracellular part;macromolecular complex;membrane coat;membrane part;organelle part;protein complex;vesicle coat	11	11	9	18.1	18.1	14.8	97.512	0	33.191	514550000	31	25.976	25.9162	26.0803	26.5387	26.6284	26.4172
+	2.11554	1.284	Q9QZF2	Q9QZF2	Glypican-1;Secreted glypican-1	Gpc1	Color2 [DarkGray]	1	4	anchored to membrane;cell part;cytoplasmic part;endosome;extracellular matrix;extracellular membrane-bounded organelle;extracellular organelle;extracellular region part;extracellular space;extracellular vesicular exosome;Golgi apparatus part;Golgi lumen;intracellular membrane-bounded organelle;intracellular organelle;intracellular organelle lumen;intracellular organelle part;intracellular part;in…	7	7	7	19.4	19.4	19.4	61.359	0	22.4	255610000	14	26.4257	25.8707	25.8709	25.0728	24.4485	24.794
+	1.26903	-2.80932	Q9QZJ6	Q9QZJ6	Microfibrillar-associated protein 5	Mfap5	Color2 [DarkGray]	1	4	extracellular matrix;extracellular matrix part;extracellular region part;fibril;microfibril;proteinaceous extracellular matrix	3	3	3	19.5	19.5	19.5	18.538	0	45.387	697050000	16	25.8624	22.7728	24.6337	28.1638	26.3593	27.1738
+	3.05357	0.505618	Q9QZQ8	Q9QZQ8	Core histone macro-H2A.1	H2afy	Color2 [DarkGray]	1	4	Barr body;cell part;centromeric heterochromatin;centrosome;chromatin;chromosomal part;chromosome;condensed chromosome;cytoplasmic part;cytoskeletal part;ESC/E(Z) complex;extracellular membrane-bounded organelle;extracellular organelle;extracellular region part;extracellular vesicular exosome;heterochromatin;histone methyltransferase complex;intracellular membrane-bounded organelle;intracellular n…	11	11	10	41.4	41.4	36.8	39.735	0	86.676	1327000000	70	27.8801	27.9345	28.0367	27.4675	27.3788	27.4881
+	3.35466	-1.10965	Q9R062	Q9R062	Glycogenin-1	Gyg1	Color2 [DarkGray]	1	4	cell part;extracellular membrane-bounded organelle;extracellular organelle;extracellular region part;extracellular vesicular exosome;membrane;membrane-bounded organelle;membrane-bounded vesicle;organelle;vesicle	10	10	10	38.1	38.1	38.1	37.402	0	68.309	2185100000	70	27.6281	27.667	27.8462	28.93	28.6673	28.8729
+	0.899757	-1.07292	Q9R0B9	Q9R0B9	Procollagen-lysine,2-oxoglutarate 5-dioxygenase 2	Plod2	Color2 [DarkGray]	1	4	cell part;cytoplasmic part;endoplasmic reticulum membrane;endoplasmic reticulum part;extracellular membrane-bounded organelle;extracellular organelle;extracellular region part;extracellular vesicular exosome;intracellular organelle part;intracellular part;membrane;membrane part;membrane-bounded organelle;membrane-bounded vesicle;organelle;organelle membrane;organelle part;rough endoplasmic reticu…	5	5	5	8.8	8.8	8.8	84.487	0	10.629	58228000	4	22.2126	22.7517	23.1561	23.1596	24.7345	23.4451
+	1.28125	-1.8195	Q9R0E1	Q9R0E1	Procollagen-lysine,2-oxoglutarate 5-dioxygenase 3	Plod3	Color2 [DarkGray]	1	4	cell part;cytoplasmic part;endoplasmic reticulum membrane;endoplasmic reticulum part;extracellular membrane-bounded organelle;extracellular organelle;extracellular region part;extracellular vesicular exosome;intracellular organelle part;intracellular part;membrane;membrane part;membrane-bounded organelle;membrane-bounded vesicle;organelle;organelle membrane;organelle part;rough endoplasmic reticu…	6	6	5	8.9	8.9	7.6	84.921	0	8.9045	107500000	9	23.7013	22.9617	21.5204	24.2204	24.8532	24.5683
+	2.33934	-1.21953	Q9R0P9	Q9R0P9	Ubiquitin carboxyl-terminal hydrolase isozyme L1	Uchl1	Color2 [DarkGray]	1	4	axon;cell body;cell part;cell projection;cytoplasm;cytoplasmic part;cytosol;endoplasmic reticulum membrane;endoplasmic reticulum part;extracellular membrane-bounded organelle;extracellular organelle;extracellular region part;extracellular vesicular exosome;intracellular organelle part;intracellular part;membrane;membrane part;membrane-bounded organelle;membrane-bounded vesicle;myelin sheath;neuro…	5	5	5	31.4	31.4	31.4	24.838	0	43.072	403520000	22	25.0746	25.4152	25.0215	26.6959	26.3777	26.0963
+	3.0892	-0.713531	Q9R0X4;Q32MW3	Q9R0X4;Q32MW3	Acyl-coenzyme A thioesterase 9, mitochondrial;Acyl-coenzyme A thioesterase 10, mitochondrial	Acot9;Acot10	Color2 [DarkGray]	1	4	cell part;cytoplasmic part;intracellular membrane-bounded organelle;intracellular organelle;intracellular part;membrane-bounded organelle;mitochondrion;organelle	17	17	17	38.3	38.3	38.3	50.56	0	57.383	1437300000	58	27.51	27.2439	27.3405	28.096	28.0584	28.0807
+	2.98451	1.01708	Q9R0Y5	Q9R0Y5	Adenylate kinase isoenzyme 1	Ak1	Color2 [DarkGray]	1	4	axoneme part;cell part;cell projection part;cytoplasm;extracellular membrane-bounded organelle;extracellular organelle;extracellular region part;extracellular vesicular exosome;intracellular part;membrane;membrane-bounded organelle;membrane-bounded vesicle;organelle;organelle part;outer dense fiber;plasma membrane;vesicle	13	13	13	64.9	64.9	64.9	21.539	0	285.46	23061000000	142	32.1387	32.3252	32.3618	31.1116	31.2209	31.442
+	2.19173	0.464277	Q9WTP6	Q9WTP6	Adenylate kinase 2, mitochondrial;Adenylate kinase 2, mitochondrial, N-terminally processed	Ak2	Color2 [DarkGray]	1	4	cell part;cytoplasmic part;cytosol;extracellular membrane-bounded organelle;extracellular organelle;extracellular region part;extracellular vesicular exosome;intracellular membrane-bounded organelle;intracellular organelle;intracellular organelle part;intracellular part;membrane;membrane-bounded organelle;membrane-bounded vesicle;membrane-enclosed lumen;mitochondrial inner membrane;mitochondrial …	10	10	10	53.6	53.6	53.6	26.468	0	112.23	2552600000	128	28.916	28.8545	28.8862	28.3503	28.5947	28.3189
+	1.80922	0.539515	Q9WTR5	Q9WTR5	Cadherin-13	Cdh13	Color2 [DarkGray]	1	4	adherens junction;anchored to membrane;anchoring junction;caveola;cell junction;cell part;cell projection;cell-substrate adherens junction;cell-substrate junction;cytoplasm;external side of plasma membrane;extracellular membrane-bounded organelle;extracellular organelle;extracellular region part;extracellular space;extracellular vesicular exosome;focal adhesion;intracellular part;intrinsic to mem…	11	11	11	20.4	20.4	20.4	78.185	0	136.4	2771200000	48	28.8819	29.0133	29.2152	28.6338	28.3234	28.5347
+	2.54102	-0.729987	Q9WU78	Q9WU78	Programmed cell death 6-interacting protein	Pdcd6ip	Color2 [DarkGray]	1	4	adherens junction;anchoring junction;cell junction;cell part;cell-substrate adherens junction;cell-substrate junction;cytoplasm;cytoplasmic membrane-bounded vesicle;cytoplasmic part;cytoplasmic vesicle;cytoskeletal part;cytosol;endoplasmic reticulum exit site;endoplasmic reticulum part;extracellular membrane-bounded organelle;extracellular organelle;extracellular region part;extracellular vesicul…	23	23	23	31.9	31.9	31.9	96.023	0	57.703	1089300000	56	26.9335	26.889	27.0095	27.6431	27.872	27.5069
[truncated: 1,287 more rows]

## Sheet: mitochondrial-Only
mit in GOCC	mit in name	Significant	-LOG(P-value)	Difference	Protein IDs	Majority protein IDs	Protein names	Gene names	Symbol color	Symbol type	Symbol size	GOCC name	Peptides	Razor + unique peptides	Unique peptides	Sequence coverage [%]	Unique + razor sequence coverage [%]	Unique sequence coverage [%]	Mol. weight [kDa]	Q-value	Score	Intensity	MS/MS count	LFQ intensity CON1	LFQ intensity CON2	LFQ intensity CON3	LFQ intensity KO1	LFQ intensity KO2	LFQ intensity KO3
[truncated: 481 more rows]

## Sheet: UpregInKO
Significant	-LOG(P-value)	Difference	Protein IDs	Majority protein IDs	Protein names	Gene names	Symbol color	Symbol type	Symbol size	GOCC name	Peptides	Razor + unique peptides	Unique peptides	Sequence coverage [%]	Unique + razor sequence coverage [%]	Unique sequence coverage [%]	Mol. weight [kDa]	Q-value	Score	Intensity	MS/MS count	LFQ intensity CON1	LFQ intensity CON2	LFQ intensity CON3	LFQ intensity KO1	LFQ intensity KO2	LFQ intensity KO3
[truncated: 347 more rows]

[truncated: 3 more sheets: DownregInKO, ProteomicRuler_SubcellLocation, MassCalculations]
