# Supplementary material for: Cardiac mitochondrial function depends on BUD23 mediated ribosome programming
Source: eLife journal article supplement (doi:10.7554/elife.50705), 2020-01-15
Supplement: supp [file elife-50705-supp-v1.zip]

# Figure 1 – figure supplement 2

**A**

\* - possible false positive

| Rank | Motif    | P-value | log P-value | % of Targets | % of Background | STD(Bg STD)       | Best Match/Details                                                                                                                  |
|------|----------|---------|-------------|--------------|-----------------|-------------------|-------------------------------------------------------------------------------------------------------------------------------------|
| 1    | ACCTGTCG | 1e-129  | -2.984e+02  | 2.48%        | 0.12%           | 48.6bp (143.5bp)  | SNAI2/MA0745.1/Jaspar(0.785)<br><a href="#">More Information</a>   <a href="#">Similar Motifs Found</a>                             |
| 2    | TAGACGCG | 1e-50   | -1.156e+02  | 2.58%        | 0.56%           | 150.2bp (258.0bp) | POL008.1_DCE_S_1/Jaspar(0.624)<br><a href="#">More Information</a>   <a href="#">Similar Motifs Found</a>                           |
| 3    | ATAACACG | 1e-47   | -1.104e+02  | 0.71%        | 0.02%           | 88.4bp (140.1bp)  | PB0119.1_Foxa2_2/Jaspar(0.702)<br><a href="#">More Information</a>   <a href="#">Similar Motifs Found</a>                           |
| 4    | AGTTGTAA | 1e-45   | -1.039e+02  | 2.56%        | 0.61%           | 207.2bp (403.7bp) | PH0158.1_Rhox11_2/Jaspar(0.710)<br><a href="#">More Information</a>   <a href="#">Similar Motifs Found</a>                          |
| 5    | TCCCCGAT | 1e-42   | -9.840e+01  | 1.57%        | 0.23%           | 98.2bp (296.8bp)  | PB0128.1_Gcm1_2/Jaspar(0.755)<br><a href="#">More Information</a>   <a href="#">Similar Motifs Found</a>                            |
| 6    | TTCGACG  | 1e-40   | -9.420e+01  | 1.78%        | 0.32%           | 182.3bp (156.2bp) | PB0179.1_Sp100_2/Jaspar(0.634)<br><a href="#">More Information</a>   <a href="#">Similar Motifs Found</a>                           |
| 7    | AACTCAGT | 1e-40   | -9.342e+01  | 3.57%        | 1.19%           | 201.6bp (325.3bp) | POL007.1_BREd/Jaspar(0.642)<br><a href="#">More Information</a>   <a href="#">Similar Motifs Found</a>                              |
| 8    | ACAGCGGT | 1e-39   | -9.103e+01  | 1.45%        | 0.22%           | 105.5bp (152.4bp) | Myf5(bHLH)/GM-Myf5-ChIP-Seq(GSE24852)/Homer(0.750)<br><a href="#">More Information</a>   <a href="#">Similar Motifs Found</a>       |
| 9    | CGGTGGCA | 1e-38   | -8.866e+01  | 2.35%        | 0.60%           | 119.2bp (180.8bp) | Hic1/MA0739.1/Jaspar(0.767)<br><a href="#">More Information</a>   <a href="#">Similar Motifs Found</a>                              |
| 10   | GCCCCACA | 1e-37   | -8.563e+01  | 2.34%        | 0.61%           | 172.6bp (294.9bp) | PB0110.1_Bcl6b_2/Jaspar(0.728)<br><a href="#">More Information</a>   <a href="#">Similar Motifs Found</a>                           |
| 11   | GCCTAGGT | 1e-36   | -8.459e+01  | 1.29%        | 0.18%           | 126.0bp (349.6bp) | ZNF711(Zf)/SHS Y5-ZNF711-ChIP-Seq(GSE20673)/Homer(0.705)<br><a href="#">More Information</a>   <a href="#">Similar Motifs Found</a> |
| 12   | ATTAGTGC | 1e-34   | -7.832e+01  | 0.92%        | 0.09%           | 115.0bp (272.0bp) | HOXA5/MA0158.1/Jaspar(0.785)<br><a href="#">More Information</a>   <a href="#">Similar Motifs Found</a>                             |
| 13   | AACCTTAG | 1e-32   | -7.435e+01  | 1.10%        | 0.15%           | 137.9bp (390.2bp) | HLTF/MA0109.1/Jaspar(0.683)<br><a href="#">More Information</a>   <a href="#">Similar Motifs Found</a>                              |
| 14   | ATGAACGT | 1e-31   | -7.217e+01  | 2.27%        | 0.66%           | 159.9bp (551.9bp) | PB0178.1_Sox8_2/Jaspar(0.712)<br><a href="#">More Information</a>   <a href="#">Similar Motifs Found</a>                            |
| 15   | GCAATTC  | 1e-30   | -6.991e+01  | 3.49%        | 1.37%           | 162.8bp (344.3bp) | YY2/MA0748.1/Jaspar(0.712)<br><a href="#">More Information</a>   <a href="#">Similar Motifs Found</a>                               |

**B**

\* - possible false positive

| Rank | Motif     | P-value | log P-value | % of Targets | % of Background | STD(Bg STD)       | Best Match/Details                                                                                                                      |
|------|-----------|---------|-------------|--------------|-----------------|-------------------|-----------------------------------------------------------------------------------------------------------------------------------------|
| 1    | GAGTCAAC  | 1e-22   | -5.174e+01  | 4.19%        | 0.17%           | 59.7bp (173.0bp)  | FOS::JUN/MA0099.2/Jaspar(0.768)<br><a href="#">More Information</a>   <a href="#">Similar Motifs Found</a>                              |
| 2    | GCTCGTCA  | 1e-21   | -4.890e+01  | 5.71%        | 0.50%           | 122.1bp (237.1bp) | PB0108.1_Atf1_2/Jaspar(0.758)<br><a href="#">More Information</a>   <a href="#">Similar Motifs Found</a>                                |
| 3    | ACAGGGGT  | 1e-21   | -4.856e+01  | 7.62%        | 1.05%           | 95.3bp (288.4bp)  | POL009.1_DCE_S_II/Jaspar(0.727)<br><a href="#">More Information</a>   <a href="#">Similar Motifs Found</a>                              |
| 4    | TGGGGCTT  | 1e-19   | -4.436e+01  | 10.48%       | 2.33%           | 169.2bp (240.2bp) | LRF(Zf)/Erythroblasts-ZBTB7A-ChIP-Seq(GSE74977)/Homer(0.724)<br><a href="#">More Information</a>   <a href="#">Similar Motifs Found</a> |
| 5    | CGACCGCT  | 1e-18   | -4.334e+01  | 4.76%        | 0.38%           | 460.6bp (190.7bp) | HINFP/MA0131.2/Jaspar(0.692)<br><a href="#">More Information</a>   <a href="#">Similar Motifs Found</a>                                 |
| 6    | GAATCAGA  | 1e-18   | -4.152e+01  | 4.19%        | 0.28%           | 95.7bp (251.4bp)  | Gfi1/MA0038.1/Jaspar(0.701)<br><a href="#">More Information</a>   <a href="#">Similar Motifs Found</a>                                  |
| 7    | TATCAGCG  | 1e-17   | -4.042e+01  | 2.67%        | 0.07%           | 59.6bp (317.5bp)  | NRL/MA0842.1/Jaspar(0.689)<br><a href="#">More Information</a>   <a href="#">Similar Motifs Found</a>                                   |
| 8    | CGCTTTTCG | 1e-17   | -3.947e+01  | 6.10%        | 0.83%           | 58.3bp (187.5bp)  | IRF7/MA0772.1/Jaspar(0.734)<br><a href="#">More Information</a>   <a href="#">Similar Motifs Found</a>                                  |
| 9    | AGTGACAG  | 1e-17   | -3.931e+01  | 14.67%       | 4.83%           | 192.2bp (236.0bp) | PBX1(Homeobox)/MCF7-PBX1-ChIP-Seq(GSE28007)/Homer(0.801)<br><a href="#">More Information</a>   <a href="#">Similar Motifs Found</a>     |
| 10   | GATCTCAG  | 1e-16   | -3.893e+01  | 10.86%       | 2.83%           | 124.9bp (239.8bp) | PB0126.1_Gata5_2/Jaspar(0.683)<br><a href="#">More Information</a>   <a href="#">Similar Motifs Found</a>                               |
| 11   | GTGCAATC  | 1e-15   | -3.534e+01  | 6.10%        | 0.96%           | 101.4bp (221.4bp) | Ddit3::Cebpa/MA0019.1/Jaspar(0.766)<br><a href="#">More Information</a>   <a href="#">Similar Motifs Found</a>                          |
| 12   | CGTTTTTCG | 1e-14   | -3.329e+01  | 6.67%        | 1.26%           | 357.8bp (243.3bp) | NFATC2/MA0152.1/Jaspar(0.663)<br><a href="#">More Information</a>   <a href="#">Similar Motifs Found</a>                                |
| 13   | GACCAA    | 1e-12   | -2.932e+01  | 13.33%       | 5.01%           | 399.0bp (268.2bp) | RORA(var.2)/MA0072.1/Jaspar(0.738)<br><a href="#">More Information</a>   <a href="#">Similar Motifs Found</a>                           |
