# Supplementary material for: Cardiac mitochondrial function depends on BUD23 mediated ribosome programming
Source: eLife. 2020 Jan 15;9:e50705. doi: 10.7554/eLife.50705 (PMC7002040; doi:10.7554/eLife.50705)
Supplement: Supplementary file 1. [file elife-50705-supp1.xlsx]

## Sheet: Sheet1
Name	Species	Target	Application	Sequence (5'-3')
BUD23_F	Mm	Bud23	Genotyping primers	5’-CCTGGCTGATGTGTTGCTTT-3’
BUD23_R	Mm	Bud23	Genotyping primers	5’-GCTGCACATCTCTCCTCACT-3’
MT-ND1_F	Hs	MT-ND1	qPCR primers	5’-GAAGTCACCCTAGCCATCATTC-3’
MT-ND1_R	Hs	MT-ND1	qPCR primers	5’GCAGGAGTAATCAGAGGTGTTC-3’
HPRT_F	Hs	HPRT	qPCR primers	GCACAGAGAGGGCTACAATG
HPRT_R	Hs	HPRT	qPCR primers	TGGCGTCGTGATTAGTGATG
MT-ATP6_F	Hs	MT-ATP6	qPCR primers	CACTAAAGGACGAACCTGATCTC
MT-ATP6_R	Hs	MT-ATP6	qPCR primers	GATAGTTGGGTGGTTGGTGTAA
MT-ATP8_F	Hs	MT-ATP8	qPCR primers	CCCTCACCAAAGCCCATAAA
MT-ATP8_R	Hs	MT-ATP8	qPCR primers	GGCAATGAATGAAGCGAACAG
PGC1A _F	Mm	PGC1A	qPCR primers	TTGACGGGCGTCATTCGGG
PGC1A_R	Mm	PGC1A	qPCR primers	AGAGCAGCACAGTCTATGTCAC
NRF2_F	Mm	NRF2	qPCR primers	GCTGCTCGGACTAGCCATTG
NRF2_R	Mm	NRF2	qPCR primers	TCAAATCCATGTCCTGCTGGG
GAPDH_F	Mm	GAPDH	qPCR primers	GCAGTGGCAAAGTGGAGATTG
GAPDH_R	Mm	GAPDH	qPCR primers	GCCGTTGAATTTGCCGTGAG
MT-ND1_F	Mm	MT-ND1	qPCR primers	TCCGAGCATCTTATCCAGGC
MT-ND1_R	Mm	MT-ND1	qPCR primers	GTATGGTGGTACTCCCGCTG
PGC1B_F	Mm	PGC1B	qPCR primers	GACGAGAAGTAAAAGAGGCCAG
PGC1B_R	Mm	PGC1B	qPCR primers	AGATGAGGGAAGGGACTCCTC
NRF1_F	Mm	NRF1	qPCR primers	TGGCCCTCAACAGTGAAGC
NRF1_R	Mm	NRF1	qPCR primers	CTCCAGTAAGTGCTCCGACG
HK2_F	Mm	HK2	qPCR primers	TTCTCTATTTGGCCCCGACTC
HK2_R	Mm	HK2	qPCR primers	TGGTCAACCTTCTGCACTTGG
PKM_F	Mm	PKM	qPCR primers	TTCGCATGGAGCACCTGATAG
PKM_R	Mm	PKM	qPCR primers	CTCCATGAGGTCTGTGGACTG
GCK_F	Mm	GCK	qPCR primers	CCTCGGGAGTCAGGAACATC
GCK_R	Mm	GCK	qPCR primers	ATCTGCTCTACCAGAGTCAACG
Mck-Cre Forward	Mm	Mck-cre	Genotyping primers	5’-GTG AAA CAG CAT TGC TGT CAC TT-3’
Mck-Cre Reverse	Mm	Mck-cre	Genotyping primers	5’-TAA GTC TGA ACC CGG TCT GC-3’
