# Supplementary figures and images for: Cardiac mitochondrial function depends on BUD23 mediated ribosome programming
Source: eLife journal article supplement (doi:10.7554/elife.50705), 2020-01-15

Figure 4 – figure supplement 1

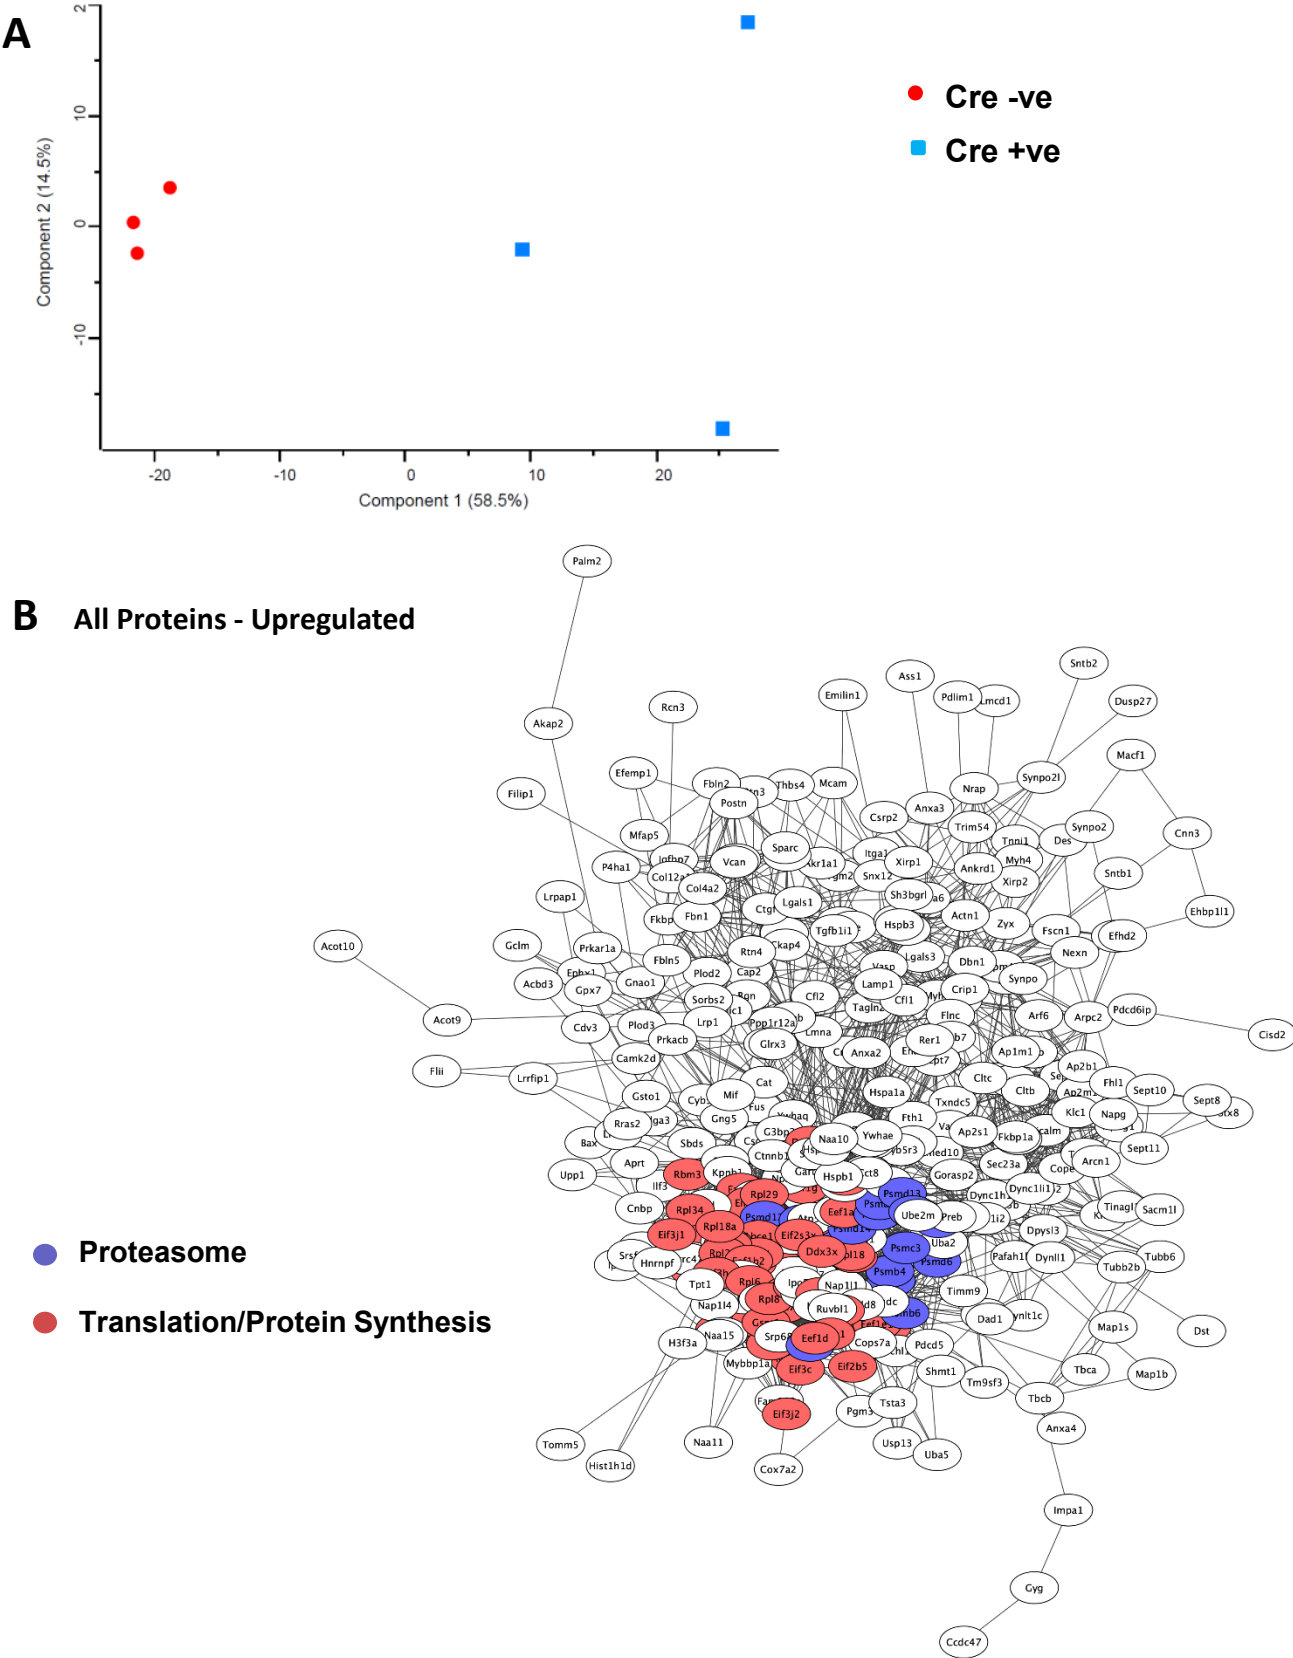

Supplement: supp [file elife-50705-supp-v1.zip]

Figure 1 – figure supplement 1

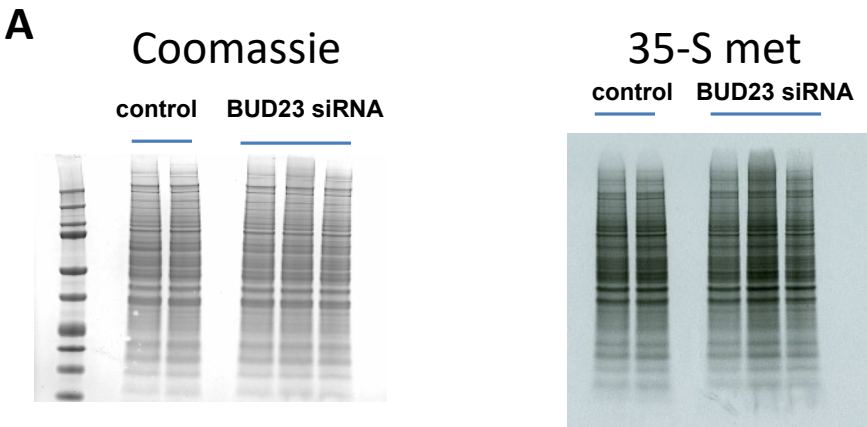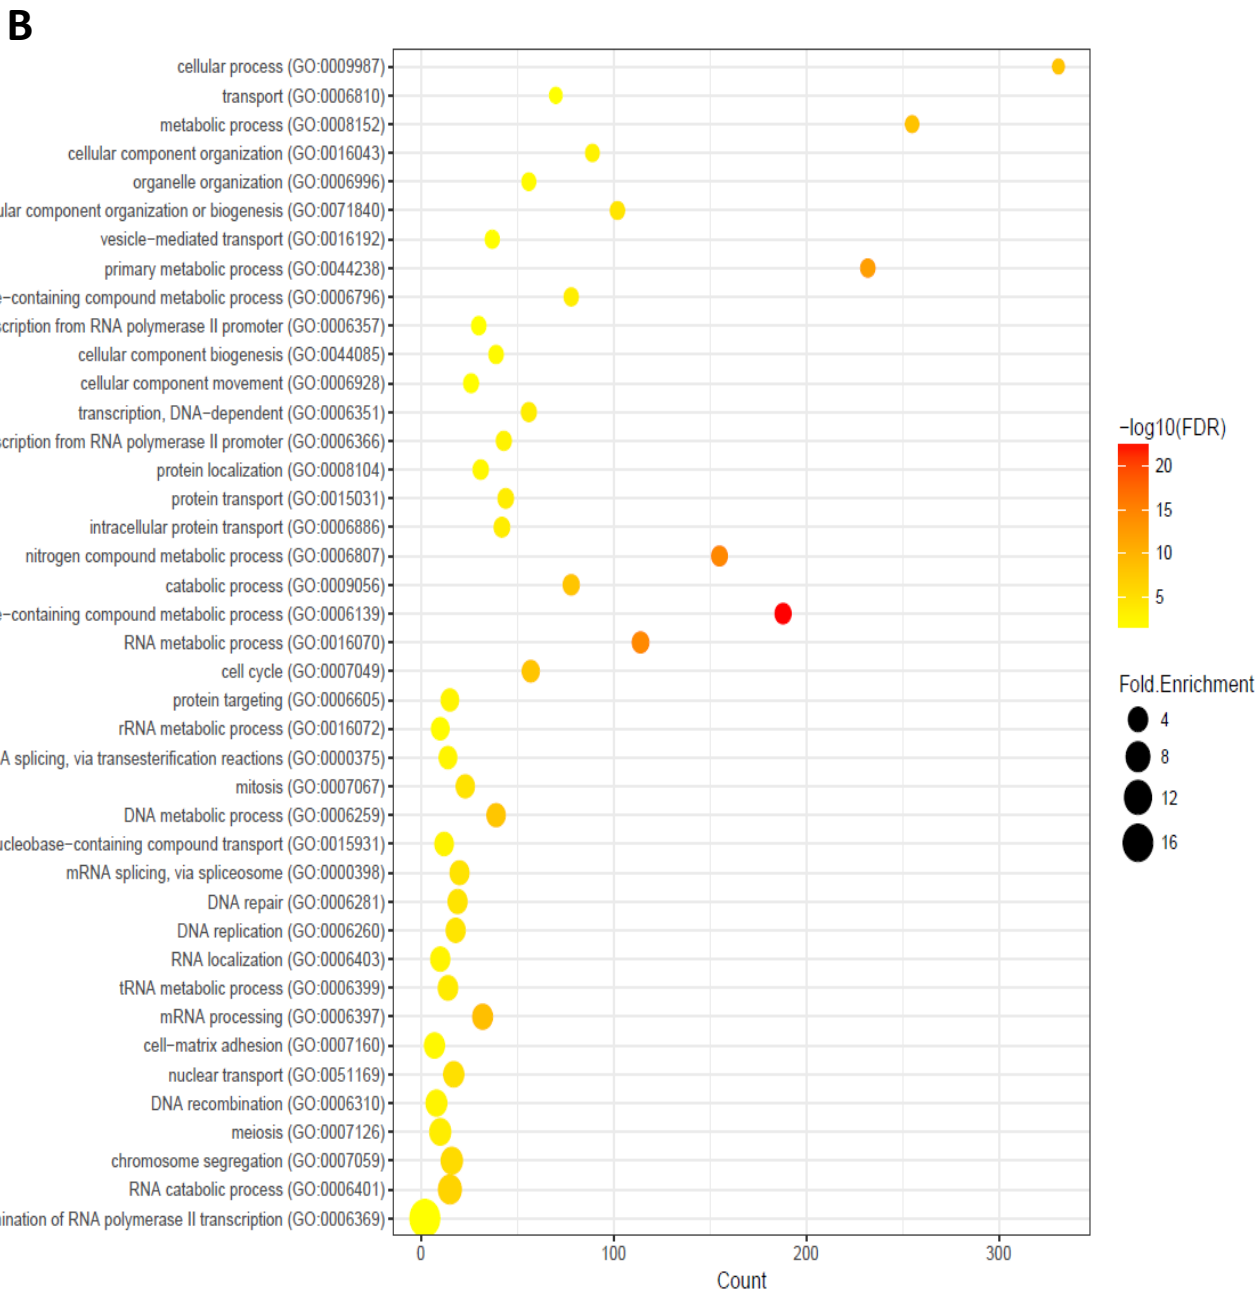

Supplement: supp [file elife-50705-supp-v1.zip]

Figure 1 – figure supplement 3

**A**

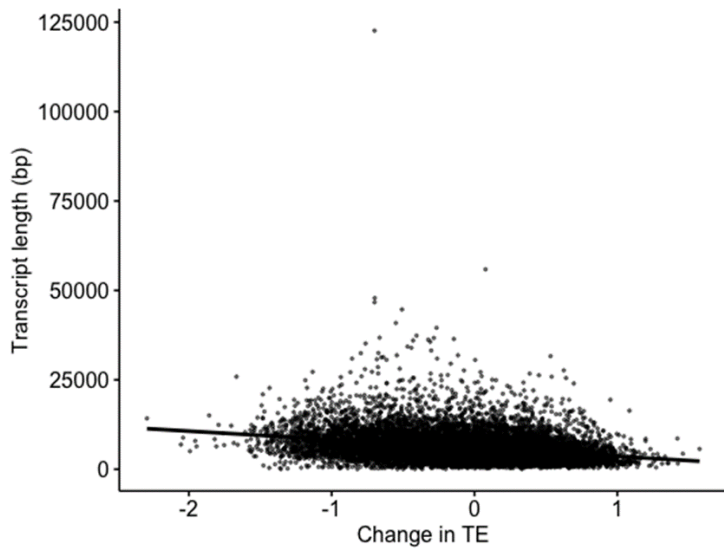

**B**

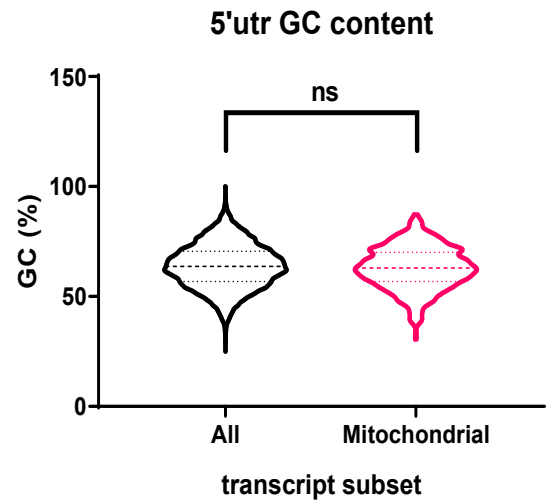

Supplement: supp [file elife-50705-supp-v1.zip]

Figure 5 – figure supplement 1

**A**

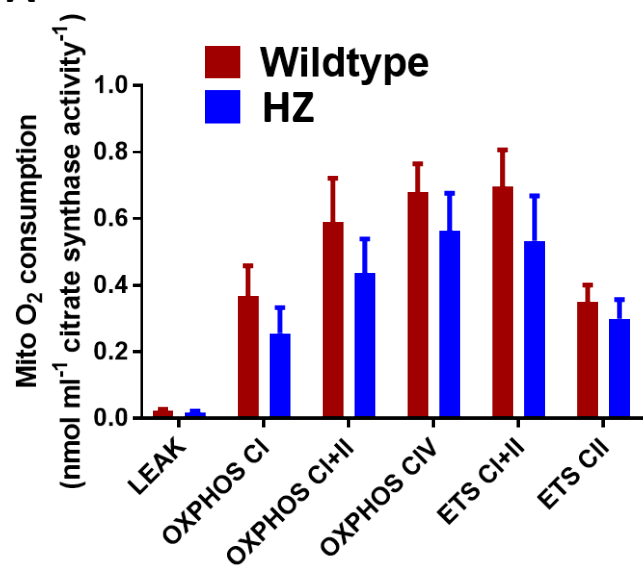

**B**

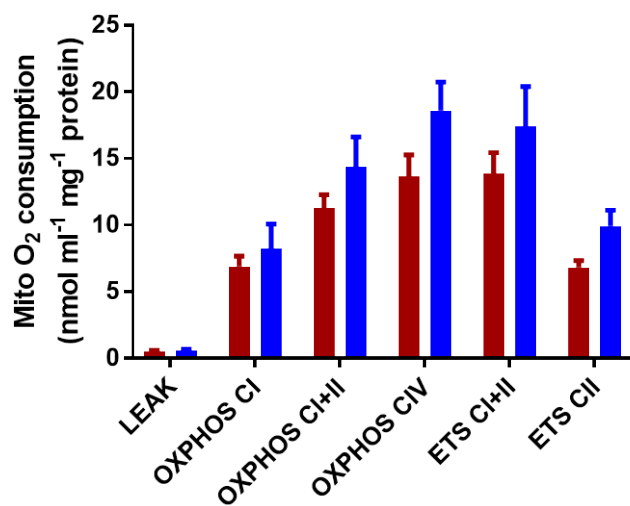

**C**

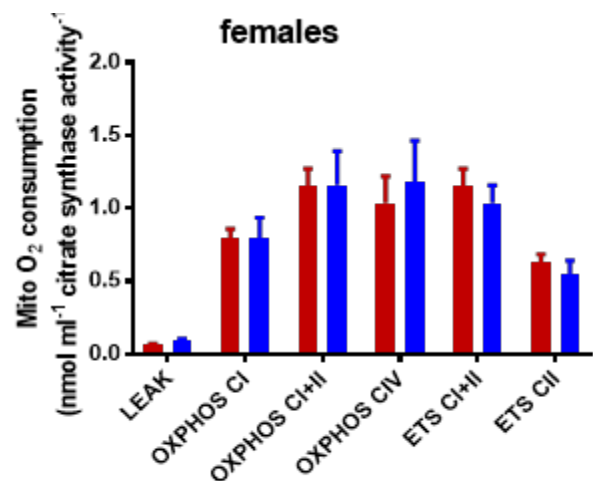

**D**

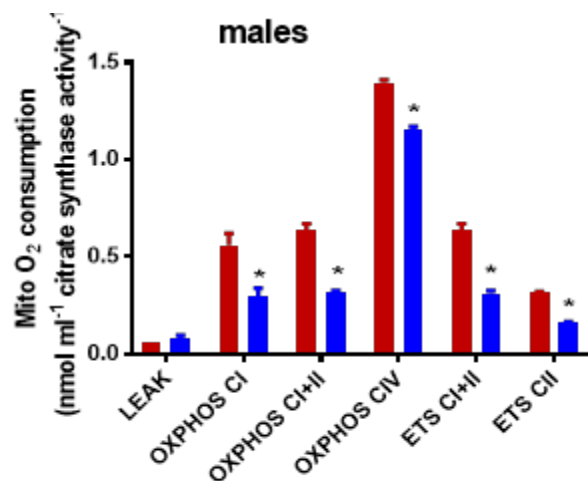

Supplement: supp [file elife-50705-supp-v1.zip]

Figure 4 – figure supplement 2

**A**

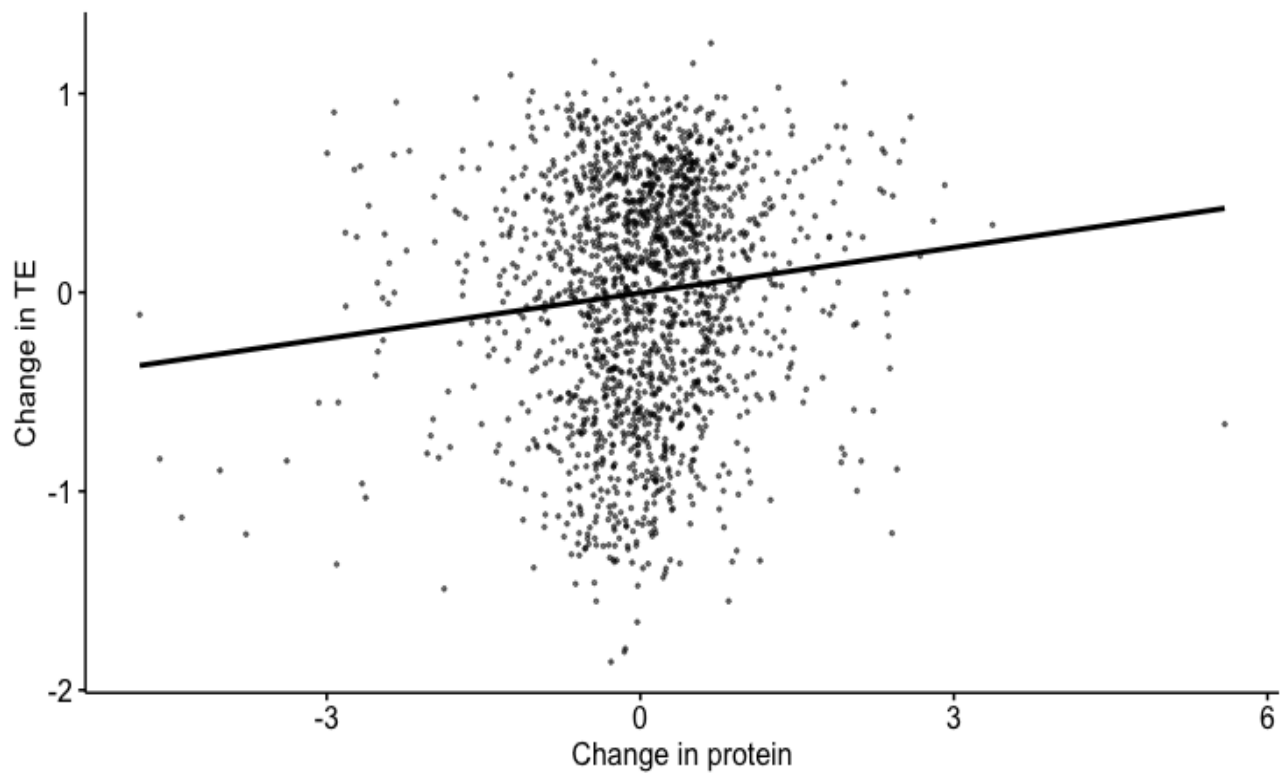

Supplement: supp [file elife-50705-supp-v1.zip]

Figure 2 – figure supplement 2

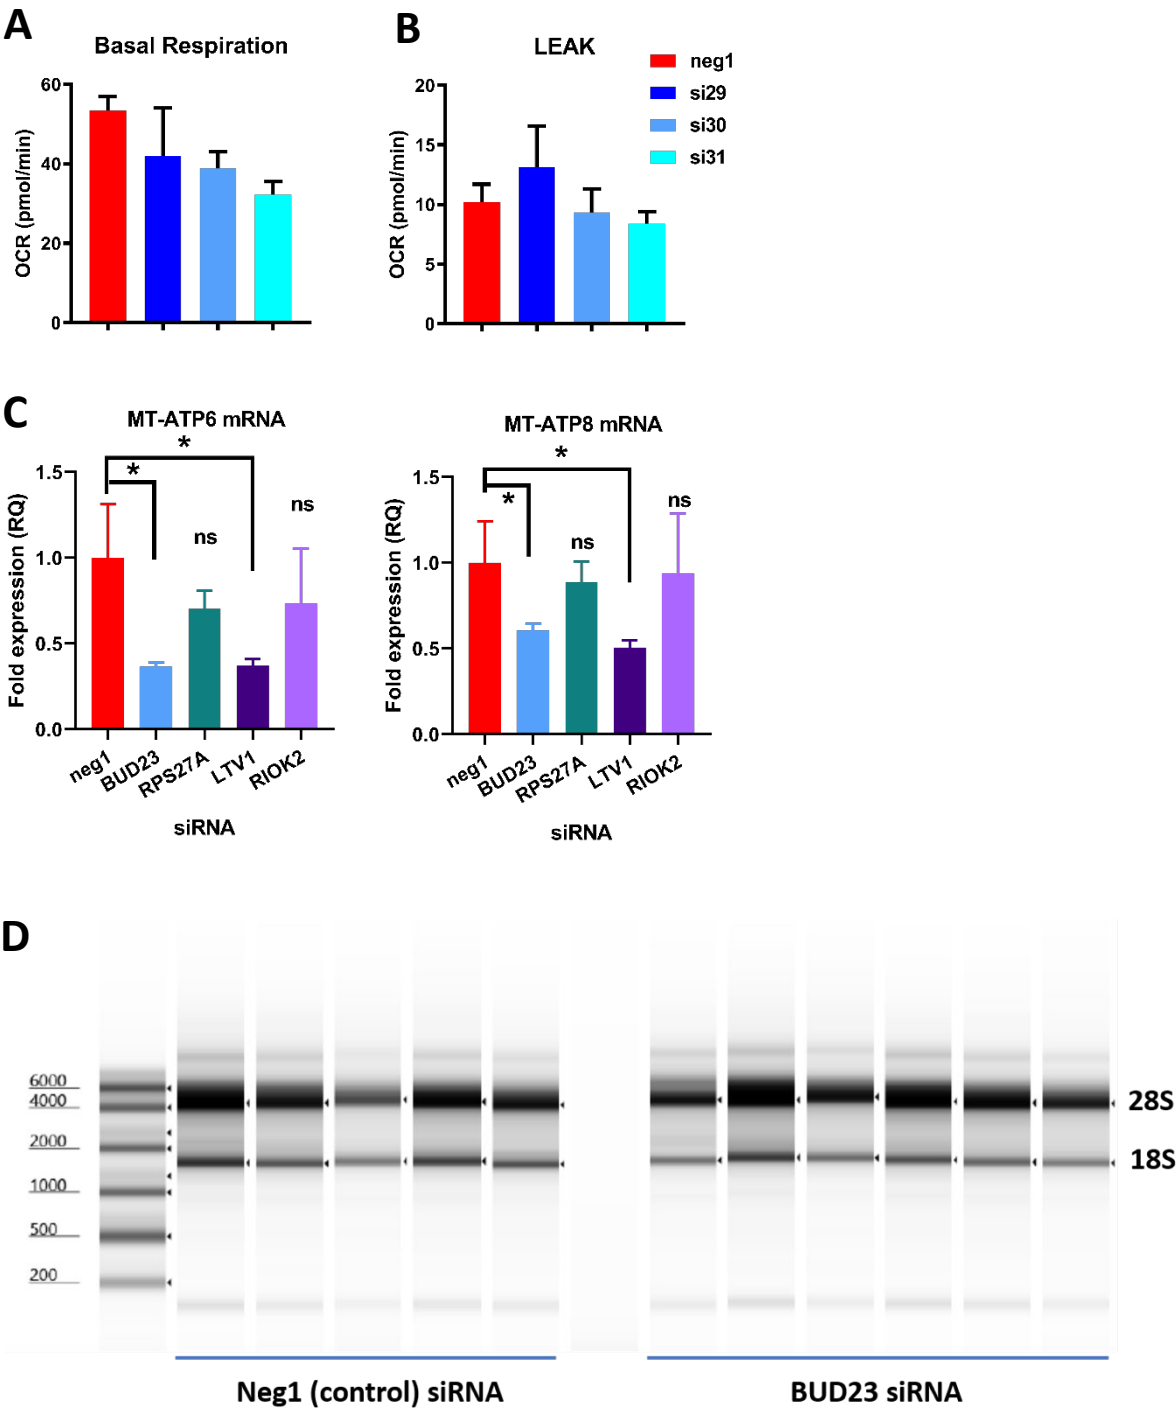

Supplement: supp [file elife-50705-supp-v1.zip]

Figure 6 – figure supplement 1

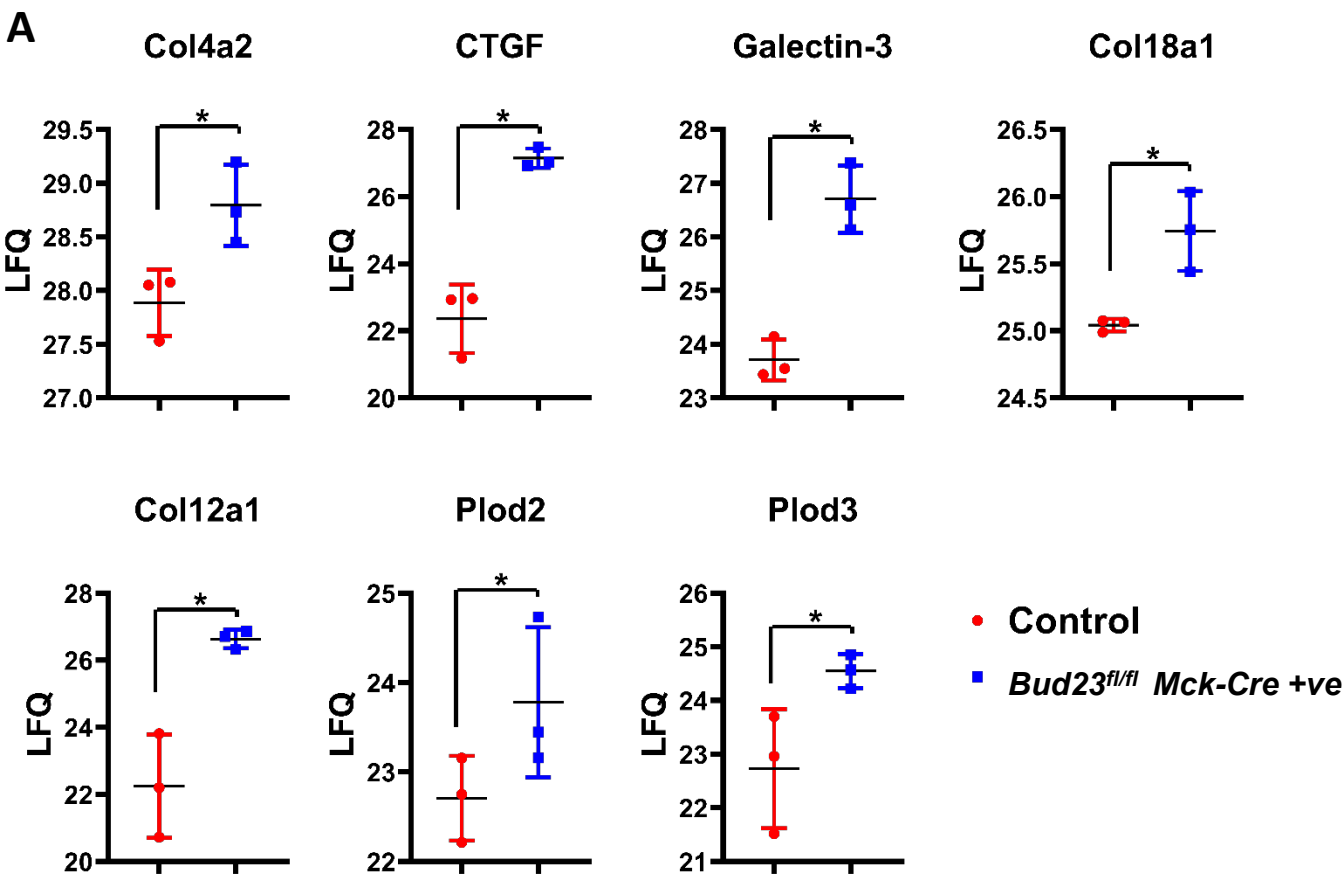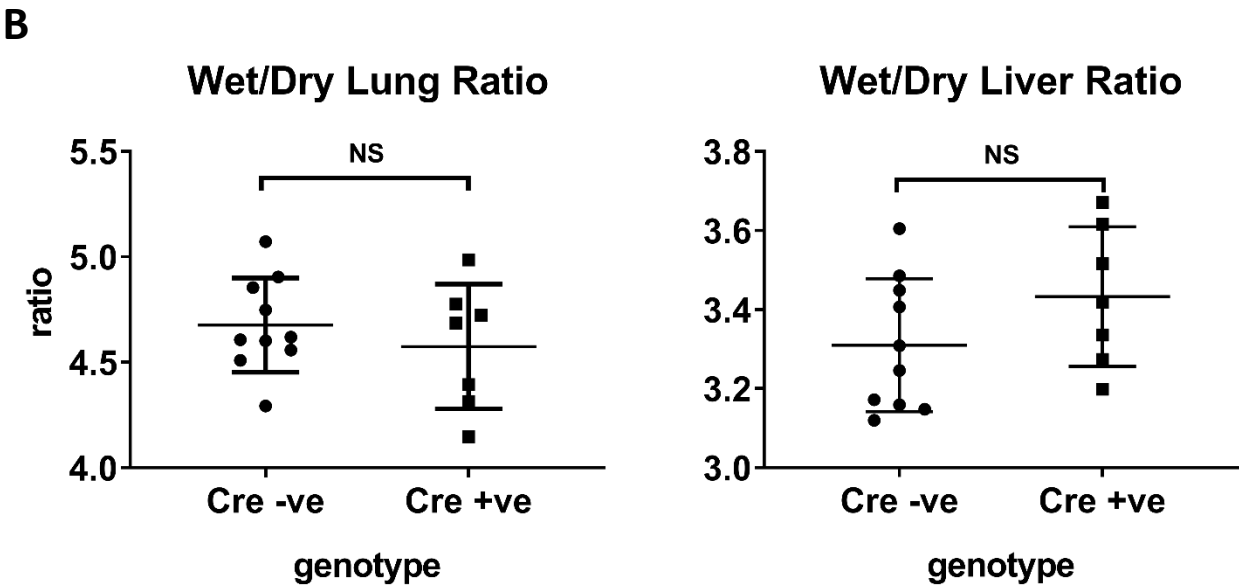

Supplement: supp [file elife-50705-supp-v1.zip]

Figure 3 – figure supplement 1

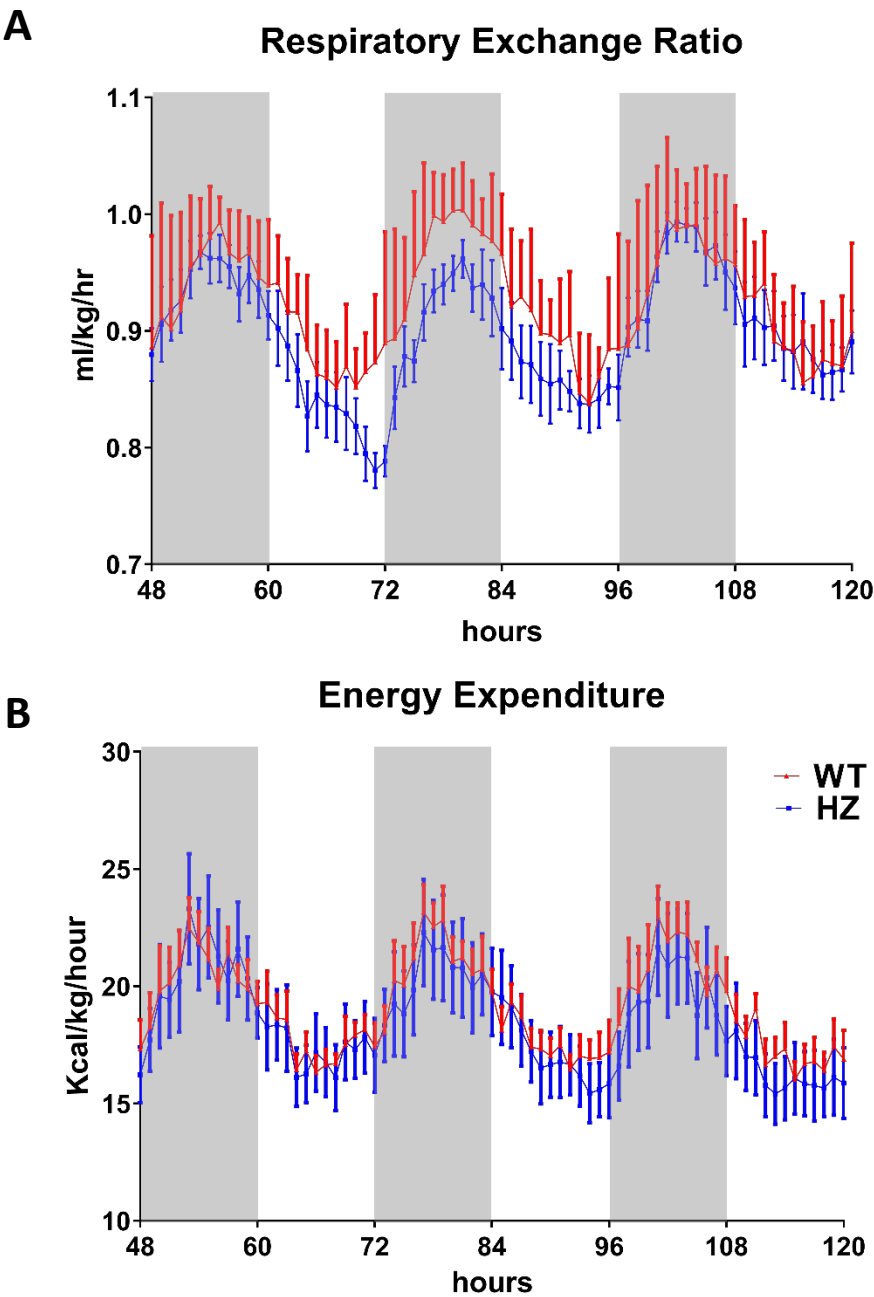

Supplement: supp [file elife-50705-supp-v1.zip]

Figure 2 – figure supplement 1

A Up-regulated  
proteins

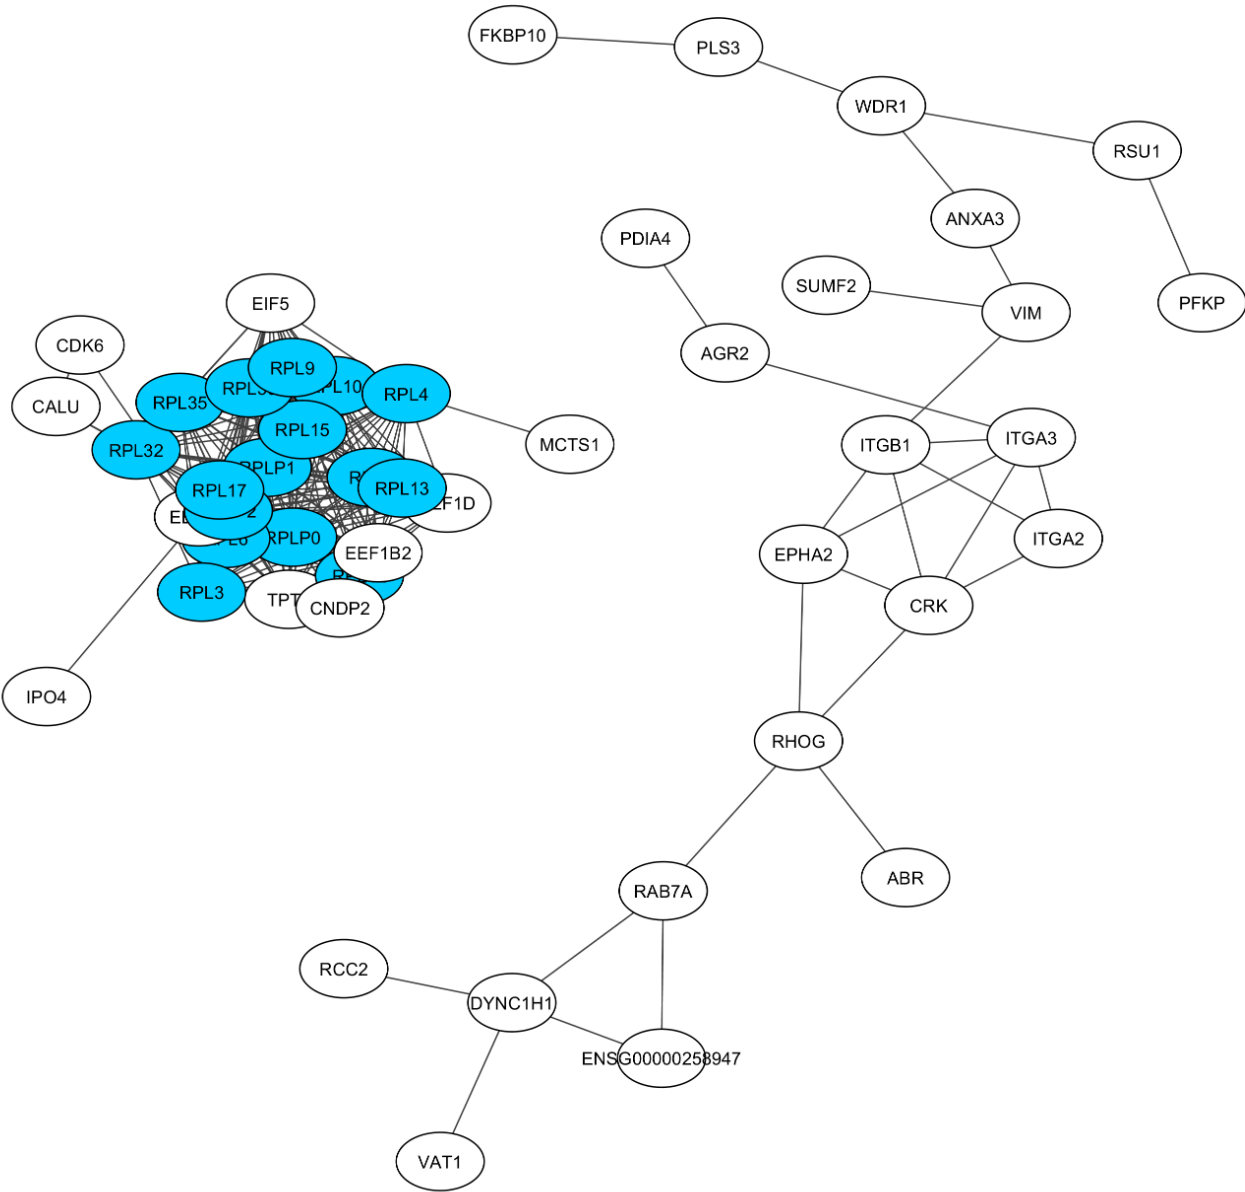

Supplement: supp [file elife-50705-supp-v1.zip]

Figure 4 – figure supplement 3

**A** Mitochondrial Proteins – Down Regulated

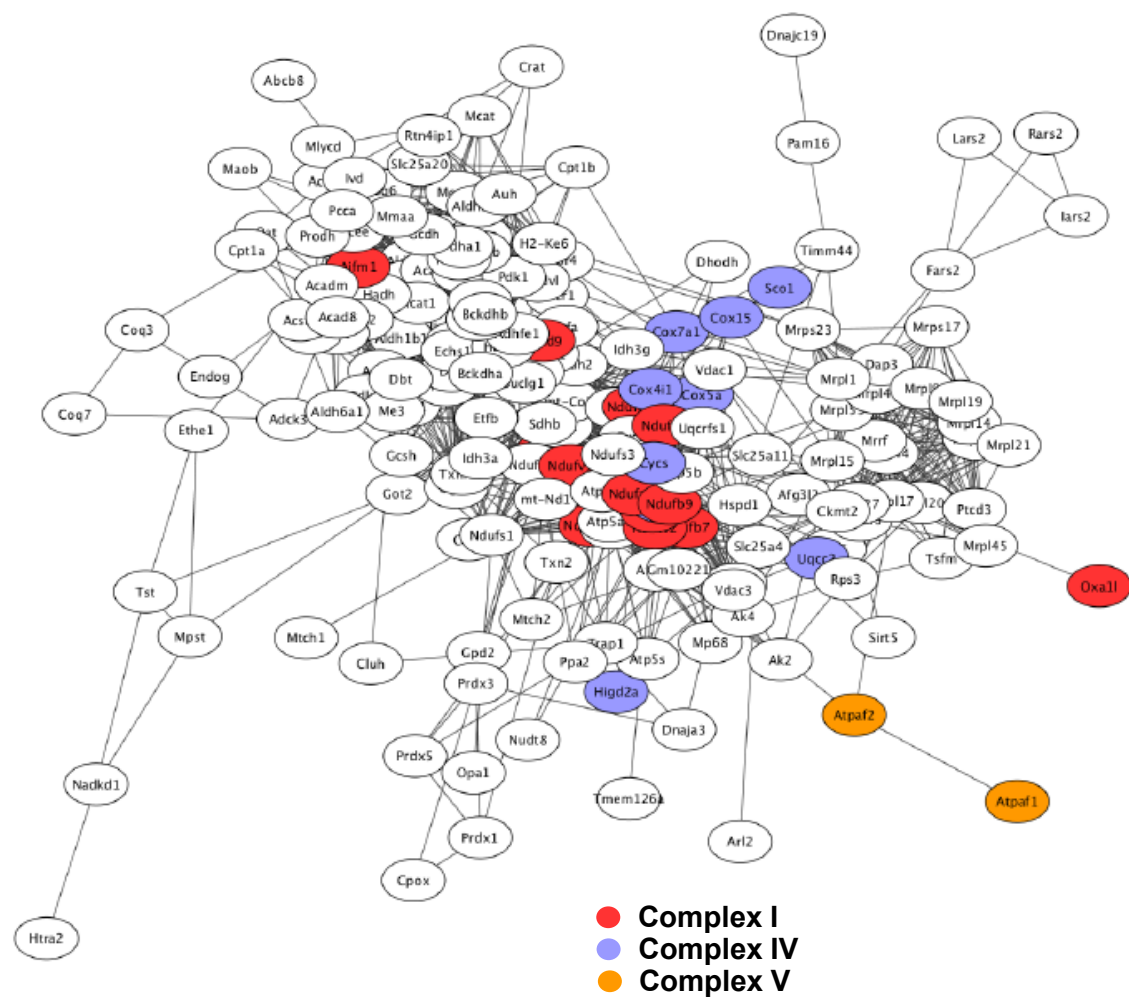

Supplement: supp [file elife-50705-supp-v1.zip]
